# Supplementary material for: Human endogenous retrovirus K activation in the lower respiratory tract of severe COVID-19 patients associates with early mortality
Source: Research Square preprint supplement (doi:10.21203/rs.3.rs-514541/v1), 2021-05-11
Supplement: Supplementary file 2 [file df6366968b4dba2294265bac.xlsx]

## Sheet: All_align
Peptides	HERV	% OF IDENTICAL MATCHES	COVER	evalue	Pep sequence length	Alignment length	MISTACHES	GAPS	Start of alignment in query	End of alignment in query	Start of alignment in subject	End of alignment in subject	Bitscore
peptide76	sp|P62684|GA113_HUMAN	66.667	100	0.34	12	9	3	0	4	12	658	666	14.6
peptide76	sp|P62684|GA113_HUMAN	36.364	100	0.64	12	11	7	0	1	11	211	221	13.9
peptide582	sp|P62684|GA113_HUMAN	55.556	100	0.13	9	9	4	0	1	9	456	464	15
peptide911	sp|P62684|GA113_HUMAN	80	100	1.2	9	5	1	0	5	9	657	661	13.1
peptide911	sp|P62684|GA113_HUMAN	44.444	100	9.1	9	9	5	0	1	9	241	249	11.2
peptide1215	sp|P62684|GA113_HUMAN	45.455	100	3.7	11	11	6	0	1	11	235	245	12.3
peptide1475	sp|P62684|GA113_HUMAN	71.429	100	0.13	8	7	2	0	1	7	626	632	15
peptide1475	sp|P62684|GA113_HUMAN	66.667	100	0.24	8	6	2	0	3	8	47	52	14.6
peptide1910	sp|P62684|GA113_HUMAN	45.455	100	4	11	11	6	0	1	11	235	245	12.3
peptide2302	sp|P62684|GA113_HUMAN	45.455	100	2.4	11	11	6	0	1	11	235	245	12.7
peptide2356	sp|P62684|GA113_HUMAN	77.778	100	0.041	17	9	2	0	9	17	232	240	17.3
peptide2356	sp|P62684|GA113_HUMAN	50	100	0.28	17	14	7	0	1	14	615	628	15
peptide2356	sp|P62684|GA113_HUMAN	45.455	100	1.1	17	11	6	0	7	17	296	306	13.9
peptide2356	sp|P62684|GA113_HUMAN	35.714	100	2.9	17	14	9	0	4	17	214	227	13.1
peptide2356	sp|P62684|GA113_HUMAN	50	100	3.3	17	10	5	0	7	16	653	662	12.7
peptide2356	sp|P62684|GA113_HUMAN	55.556	100	5.1	17	9	4	0	5	13	652	660	12.3
peptide2356	sp|P62684|GA113_HUMAN	50	100	5.8	17	10	5	0	6	15	610	619	12.3
peptide2444	sp|P62684|GA113_HUMAN	36.364	100	7.1	11	11	7	0	1	11	574	584	11.5
peptide2505	sp|P62684|GA113_HUMAN	33.333	100	0.15	21	21	14	0	1	21	473	493	16.2
peptide2691	sp|P62684|GA113_HUMAN	50	100	0.21	14	14	7	0	1	14	615	628	15
peptide3081	sp|P62684|GA113_HUMAN	45.455	100	2.8	11	11	6	0	1	11	235	245	12.7
peptide3250	sp|P62684|GA113_HUMAN	36.364	100	4	11	11	7	0	1	11	574	584	12.3
peptide3783	sp|P62684|GA113_HUMAN	29.412	100	0.7	17	17	12	0	1	17	535	551	14.2
peptide3831	sp|P62684|GA113_HUMAN	71.429	100	0.097	7	7	2	0	1	7	626	632	15
peptide4006	sp|P62684|GA113_HUMAN	44.444	100	1.9	9	9	5	0	1	9	64	72	12.7
peptide4024	sp|P62684|GA113_HUMAN	45.455	100	2.5	11	11	6	0	1	11	235	245	12.7
peptide4053	sp|P62684|GA113_HUMAN	33.333	100	0.15	21	21	14	0	1	21	473	493	16.2
peptide4826	sp|P62684|GA113_HUMAN	50	100	0.6	23	12	6	0	1	12	613	624	15
peptide4826	sp|P62684|GA113_HUMAN	43.75	100	1.4	23	16	9	0	5	20	603	618	13.9
peptide4826	sp|P62684|GA113_HUMAN	55.556	100	5.4	23	9	4	0	15	23	232	240	12.7
peptide4854	sp|P62684|GA113_HUMAN	41.667	100	9.2	12	12	7	0	1	12	389	400	11.5
peptide5403	sp|P62684|GA113_HUMAN	40	100	1.8	12	10	6	0	1	10	181	190	13.1
peptide5403	sp|P62684|GA113_HUMAN	62.5	100	4.5	12	8	3	0	5	12	242	249	12.3
peptide5436	sp|P62684|GA113_HUMAN	33.333	100	0.15	21	21	14	0	1	21	473	493	16.2
peptide5437	sp|P62684|GA113_HUMAN	36.842	100	6.4	19	19	12	0	1	19	144	162	12.3
peptide6073	sp|P62684|GA113_HUMAN	41.176	100	0.066	17	17	10	0	1	17	441	457	16.5
peptide6087	sp|P62684|GA113_HUMAN	66.667	100	0.39	9	9	3	0	1	9	658	666	14.2
peptide6087	sp|P62684|GA113_HUMAN	50	100	1.6	9	8	4	0	1	8	214	221	13.1
peptide6344	sp|P62684|GA113_HUMAN	46.154	100	0.037	13	13	7	0	1	13	533	545	16.9
peptide6652	sp|P62684|GA113_HUMAN	33.333	100	2.3	12	12	8	0	1	12	148	159	12.7
peptide6652	sp|P62684|GA113_HUMAN	66.667	100	2.6	12	6	2	0	6	11	447	452	12.7
peptide6652	sp|P62684|GA113_HUMAN	57.143	100	4.1	12	7	3	0	3	9	381	387	12.3
peptide6806	sp|P62684|GA113_HUMAN	46.154	100	0.084	13	13	7	0	1	13	228	240	15.8
peptide7114	sp|P62684|GA113_HUMAN	33.333	100	0.15	21	21	14	0	1	21	473	493	16.2
peptide7402	sp|P62684|GA113_HUMAN	54.545	100	0.24	27	11	5	0	14	24	235	245	16.2
peptide7402	sp|P62684|GA113_HUMAN	41.667	100	2.3	27	12	7	0	16	27	51	62	13.9
peptide7402	sp|P62684|GA113_HUMAN	37.037	100	2.7	27	27	16	1	1	26	129	155	13.5
peptide7792	sp|P62684|GA113_HUMAN	50	100	0.15	12	12	6	0	1	12	613	624	15.4
peptide8517	sp|P62684|GA113_HUMAN	58.333	100	0.23	23	12	5	0	3	14	232	243	15.8
peptide8517	sp|P62684|GA113_HUMAN	52.381	100	0.64	23	21	8	1	4	22	222	242	14.6
peptide8517	sp|P62684|GA113_HUMAN	41.667	100	2.7	23	12	7	0	4	15	255	266	13.5
peptide8517	sp|P62684|GA113_HUMAN	42.105	100	3.5	23	19	11	0	5	23	628	646	13.1
peptide8517	sp|P62684|GA113_HUMAN	50	100	7.8	23	10	5	0	1	10	178	187	12.3
peptide8664	sp|P62684|GA113_HUMAN	62.5	100	0.57	15	8	3	0	1	8	643	650	14.2
peptide8664	sp|P62684|GA113_HUMAN	50	100	2.1	15	10	5	0	6	15	641	650	13.1
peptide8669	sp|P62684|GA113_HUMAN	50	100	0.023	12	12	6	0	1	12	409	420	17.3
peptide8732	sp|P62684|GA113_HUMAN	30	100	0.67	10	10	7	0	1	10	370	379	13.9
peptide8932	sp|P62684|GA113_HUMAN	33.333	100	5.4	12	12	8	0	1	12	459	470	11.9
peptide9342	sp|P62684|GA113_HUMAN	37.5	100	0.59	8	8	5	0	1	8	58	65	13.9
peptide9641	sp|P62684|GA113_HUMAN	44.444	100	2.8	9	9	5	0	1	9	645	653	12.3
peptide9723	sp|P62684|GA113_HUMAN	36.842	100	6.4	19	19	12	0	1	19	144	162	12.3
peptide10103	sp|P62684|GA113_HUMAN	57.143	100	4.4	7	7	3	0	1	7	173	179	11.9
peptide10760	sp|P62684|GA113_HUMAN	40	100	1.6	15	15	9	0	1	15	106	120	13.5
peptide10872	sp|P62684|GA113_HUMAN	38.462	100	4.9	13	13	8	0	1	13	13	25	12.3
peptide11166	sp|P62684|GA113_HUMAN	50	100	0.027	11	10	5	0	1	10	216	225	17.3
peptide11166	sp|P62684|GA113_HUMAN	71.429	100	1.4	11	7	2	0	4	10	655	661	13.1
peptide11166	sp|P62684|GA113_HUMAN	40	100	6	11	10	6	0	2	11	250	259	11.9
peptide12135	sp|P62684|GA113_HUMAN	50	100	0.1	12	12	6	0	1	12	335	346	15.4
peptide12778	sp|P62684|GA113_HUMAN	45.455	100	5.6	11	11	6	0	1	11	129	139	11.9
peptide12876	sp|P62684|GA113_HUMAN	62.5	100	1.2	21	8	3	0	8	15	182	189	13.9
peptide12876	sp|P62684|GA113_HUMAN	23.81	100	2.3	21	21	16	0	1	21	478	498	13.5
peptide12960	sp|P62684|GA113_HUMAN	33.333	100	4.3	21	21	14	0	1	21	171	191	12.7
peptide13123	sp|P62684|GA113_HUMAN	45.455	100	0.95	11	11	6	0	1	11	455	465	13.5
peptide13433	sp|P62684|GA113_HUMAN	36.842	100	0.82	19	19	12	0	1	19	236	254	14.2
peptide13433	sp|P62684|GA113_HUMAN	80	100	2.8	19	5	1	0	8	12	614	618	13.1
peptide13433	sp|P62684|GA113_HUMAN	50	100	5.4	19	10	5	0	2	11	207	216	12.3
peptide13668	sp|P62684|GA113_HUMAN	41.176	100	0.5	17	17	10	0	1	17	428	444	14.6
peptide13741	sp|P62684|GA113_HUMAN	13.636	100	1.9	22	22	19	0	1	22	329	350	13.9
peptide13799	sp|P62684|GA113_HUMAN	71.429	100	0.52	15	7	2	0	1	7	613	619	14.2
peptide13799	sp|P62684|GA113_HUMAN	83.333	100	0.91	15	6	1	0	10	15	254	259	13.9
peptide13799	sp|P62684|GA113_HUMAN	50	100	8.4	15	8	4	0	6	13	652	659	11.5
peptide13842	sp|P62684|GA113_HUMAN	40	100	1.8	12	10	6	0	1	10	181	190	13.1
peptide13842	sp|P62684|GA113_HUMAN	62.5	100	4.5	12	8	3	0	5	12	242	249	12.3
peptide13961	sp|P62684|GA113_HUMAN	40	100	6.7	10	10	6	0	1	10	297	306	11.5
peptide14442	sp|P62684|GA113_HUMAN	41.667	100	5.3	12	12	7	0	1	12	239	250	11.9
peptide14567	sp|P62684|GA113_HUMAN	57.143	100	1.2	7	7	3	0	1	7	106	112	13.1
peptide14612	sp|P62684|GA113_HUMAN	77.778	100	0.048	19	9	2	0	9	17	232	240	17.3
peptide14612	sp|P62684|GA113_HUMAN	50	100	0.42	19	14	7	0	1	14	615	628	15
peptide14612	sp|P62684|GA113_HUMAN	45.455	100	1.3	19	11	6	0	7	17	296	306	13.9
peptide14612	sp|P62684|GA113_HUMAN	46.154	100	2.3	19	13	7	0	7	19	653	665	13.1
peptide14612	sp|P62684|GA113_HUMAN	38.462	100	5	19	13	8	0	4	16	214	226	12.3
peptide14612	sp|P62684|GA113_HUMAN	55.556	100	6.9	19	9	4	0	5	13	652	660	12.3
peptide14612	sp|P62684|GA113_HUMAN	50	100	8.4	19	10	5	0	6	15	610	619	11.9
peptide14613	sp|P62684|GA113_HUMAN	43.75	100	0.96	21	16	9	0	3	18	603	618	14.2
peptide14613	sp|P62684|GA113_HUMAN	55.556	100	4	21	9	4	0	13	21	232	240	12.7
peptide14613	sp|P62684|GA113_HUMAN	50	100	4.1	21	10	5	0	1	10	615	624	12.7
peptide14613	sp|P62684|GA113_HUMAN	38.889	100	8	21	18	10	1	4	21	290	306	12.3
peptide15223	sp|P62684|GA113_HUMAN	37.5	100	2.6	8	8	5	0	1	8	13	20	12.3
peptide15363	sp|P62684|GA113_HUMAN	50	100	0.91	10	10	5	0	1	10	49	58	13.5
peptide15946	sp|P62684|GA113_HUMAN	70	100	0.12	14	10	3	0	4	13	631	640	15.4
peptide15946	sp|P62684|GA113_HUMAN	58.333	100	5.3	14	12	4	1	1	12	232	242	12.3
peptide15946	sp|P62684|GA113_HUMAN	50	100	5.4	14	12	6	0	3	14	214	225	11.9
peptide15948	sp|P62684|GA113_HUMAN	64.286	100	0.45	16	14	4	1	3	16	232	244	14.6
peptide15948	sp|P62684|GA113_HUMAN	53.846	100	1.8	16	13	6	0	4	16	222	234	13.5
peptide15948	sp|P62684|GA113_HUMAN	66.667	100	2	16	9	3	0	1	9	237	245	13.1
peptide15948	sp|P62684|GA113_HUMAN	50	100	6.8	16	8	4	0	9	16	445	452	11.9
peptide15948	sp|P62684|GA113_HUMAN	46.154	100	7.8	16	13	7	0	1	13	178	190	11.9
peptide17053	sp|P62684|GA113_HUMAN	44.444	100	0.74	9	9	5	0	1	9	593	601	13.5
peptide17069	sp|P62684|GA113_HUMAN	45.455	100	4.7	11	11	6	0	1	11	262	272	11.9
peptide17498	sp|P62684|GA113_HUMAN	62.5	100	0.18	8	8	3	0	1	8	413	420	14.6
peptide17902	sp|P62684|GA113_HUMAN	55.556	100	0.04	10	9	4	0	1	9	217	225	16.5
peptide17902	sp|P62684|GA113_HUMAN	71.429	100	1.3	10	7	2	0	3	9	655	661	13.1
peptide17902	sp|P62684|GA113_HUMAN	40	100	5.2	10	10	6	0	1	10	250	259	11.9
peptide18101	sp|P62684|GA113_HUMAN	41.176	100	0.066	17	17	10	0	1	17	441	457	16.5
peptide18137	sp|P62684|GA113_HUMAN	33.333	100	3.3	9	9	6	0	1	9	113	121	12.3
peptide18751	sp|P62684|GA113_HUMAN	58.333	100	0.077	14	12	5	0	3	14	232	243	16.2
peptide18751	sp|P62684|GA113_HUMAN	66.667	100	1.4	14	9	3	0	1	9	237	245	13.5
peptide18751	sp|P62684|GA113_HUMAN	60	100	1.5	14	10	4	0	4	13	222	231	13.5
peptide18751	sp|P62684|GA113_HUMAN	50	100	1.5	14	10	5	0	5	14	256	265	13.5
peptide18751	sp|P62684|GA113_HUMAN	46.154	100	4.1	14	13	7	0	1	13	178	190	12.3
peptide18751	sp|P62684|GA113_HUMAN	66.667	100	6.6	14	6	2	0	6	11	658	663	11.9
peptide602	sp|P63121|VP113_HUMAN	40	100	2.3	10	10	6	0	1	10	140	149	12.7
peptide7214	sp|P63121|VP113_HUMAN	38.889	100	2.3	18	18	11	0	1	18	127	144	13.1
peptide8548	sp|P63121|VP113_HUMAN	26.667	100	3.9	15	15	11	0	1	15	84	98	12.7
peptide11601	sp|P63121|VP113_HUMAN	40	100	8.6	10	10	6	0	1	10	68	77	11.5
peptide17315	sp|P63121|VP113_HUMAN	57.143	100	0.41	7	7	3	0	1	7	35	41	13.9
peptide115	sp|P63132|PO113_HUMAN	37.5	100	1.3	16	16	10	0	1	16	290	305	13.5
peptide253	sp|P63132|PO113_HUMAN	80	100	0.3	10	5	1	0	4	8	103	107	14.6
peptide253	sp|P63132|PO113_HUMAN	50	100	5.2	10	10	5	0	1	10	94	103	11.9
peptide568	sp|P63132|PO113_HUMAN	27.586	100	0.81	27	29	19	1	1	27	924	952	14.6
peptide889	sp|P63132|PO113_HUMAN	50	100	0.25	8	8	4	0	1	8	197	204	14.6
peptide1710	sp|P63132|PO113_HUMAN	45.455	100	0.16	11	11	6	0	1	11	427	437	15
peptide2169	sp|P63132|PO113_HUMAN	38.889	100	0.002	18	18	11	0	1	18	935	952	21.2
peptide2340	sp|P63132|PO113_HUMAN	42.857	100	2.8	14	14	8	0	1	14	462	475	12.7
peptide2451	sp|P63132|PO113_HUMAN	40	100	3.3	10	10	6	0	1	10	943	952	12.3
peptide2502	sp|P63132|PO113_HUMAN	83.333	100	0.16	10	6	1	0	5	10	265	270	15
peptide2502	sp|P63132|PO113_HUMAN	50	100	1.8	10	8	4	0	1	8	180	187	12.7
peptide2778	sp|P63132|PO113_HUMAN	50	100	7.3	10	10	5	0	1	10	466	475	11.5
peptide2847	sp|P63132|PO113_HUMAN	38.889	100	0.002	18	18	11	0	1	18	935	952	21.2
peptide3001	sp|P63132|PO113_HUMAN	21.429	100	0.35	14	14	11	0	1	14	266	279	14.6
peptide3068	sp|P63132|PO113_HUMAN	33.333	100	0.19	27	30	17	1	1	27	536	565	16.2
peptide3286	sp|P63132|PO113_HUMAN	44.444	100	0.11	9	9	5	0	1	9	95	103	15.4
peptide3286	sp|P63132|PO113_HUMAN	50	100	0.18	9	8	4	0	2	9	331	338	15
peptide3451	sp|P63132|PO113_HUMAN	50	100	0.035	14	14	7	0	1	14	30	43	17.3
peptide3881	sp|P63132|PO113_HUMAN	33.333	100	3.8	18	18	12	0	1	18	645	662	12.7
peptide3992	sp|P63132|PO113_HUMAN	35.714	100	0.67	14	14	9	0	1	14	759	772	14.2
peptide4342	sp|P63132|PO113_HUMAN	50	100	1.6	8	8	4	0	1	8	519	526	12.7
peptide4504	sp|P63132|PO113_HUMAN	36.842	100	0.14	19	19	12	0	1	19	309	327	16.2
peptide4669	sp|P63132|PO113_HUMAN	36.364	100	0.72	11	11	7	0	1	11	942	952	13.9
peptide4743	sp|P63132|PO113_HUMAN	40	100	8.5	10	10	6	0	1	10	856	865	11.5
peptide4764	sp|P63132|PO113_HUMAN	42.857	100	4.8	14	14	8	0	1	14	462	475	12.3
peptide4792	sp|P63132|PO113_HUMAN	42.857	100	0.066	15	14	8	0	1	14	222	235	16.5
peptide4792	sp|P63132|PO113_HUMAN	100	100	0.45	15	5	0	0	11	15	310	314	14.6
peptide4795	sp|P63132|PO113_HUMAN	62.5	100	1.9	8	8	3	0	1	8	400	407	12.7
peptide5087	sp|P63132|PO113_HUMAN	54.545	100	0.008	11	11	5	0	1	11	95	105	18.5
peptide5126	sp|P63132|PO113_HUMAN	41.667	100	5.4	12	12	7	0	1	12	471	482	11.9
peptide5323	sp|P63132|PO113_HUMAN	30.769	100	3.7	13	13	9	0	1	13	799	811	12.3
peptide5766	sp|P63132|PO113_HUMAN	40	100	4.5	10	10	6	0	1	10	763	772	11.9
peptide5831	sp|P63132|PO113_HUMAN	83.333	100	0.08	16	6	1	0	11	16	571	576	16.2
peptide5831	sp|P63132|PO113_HUMAN	33.333	100	4.9	16	15	10	0	1	15	13	27	12.3
peptide6198	sp|P63132|PO113_HUMAN	40	100	4.5	10	10	6	0	1	10	412	421	11.9
peptide6286	sp|P63132|PO113_HUMAN	45.455	100	0.33	11	11	6	0	1	11	842	852	14.6
peptide7102	sp|P63132|PO113_HUMAN	38.462	100	0.24	21	13	8	0	1	13	339	351	15.4
peptide7102	sp|P63132|PO113_HUMAN	50	100	0.71	21	10	5	0	7	16	843	852	14.6
peptide7102	sp|P63132|PO113_HUMAN	26.667	100	5.2	21	15	11	0	7	21	790	804	12.7
peptide7297	sp|P63132|PO113_HUMAN	80	100	0.27	16	5	1	0	4	8	103	107	15
peptide7297	sp|P63132|PO113_HUMAN	36.364	100	0.51	16	11	7	0	6	16	734	744	14.6
peptide7297	sp|P63132|PO113_HUMAN	50	100	5	16	10	5	0	1	10	94	103	12.3
peptide7938	sp|P63132|PO113_HUMAN	42.857	100	0.075	14	14	8	0	1	14	171	184	16.2
peptide8778	sp|P63132|PO113_HUMAN	40	100	1.5	24	15	9	0	1	15	339	353	13.9
peptide8778	sp|P63132|PO113_HUMAN	31.25	100	8.4	24	16	11	0	9	24	806	821	12.3
peptide8798	sp|P63132|PO113_HUMAN	40	100	1.3	10	10	6	0	1	10	802	811	13.1
peptide8936	sp|P63132|PO113_HUMAN	40	100	3.2	10	10	6	0	1	10	763	772	12.3
peptide9513	sp|P63132|PO113_HUMAN	37.5	100	1	14	8	5	0	7	14	414	421	13.9
peptide9513	sp|P63132|PO113_HUMAN	30.769	100	1.1	14	13	9	0	1	13	27	39	13.5
peptide10117	sp|P63132|PO113_HUMAN	55.556	100	0.12	9	9	4	0	1	9	170	178	15.4
peptide10606	sp|P63132|PO113_HUMAN	62.5	100	0.92	8	8	3	0	1	8	36	43	13.5
peptide10645	sp|P63132|PO113_HUMAN	30	100	0.44	10	10	7	0	1	10	818	827	14.2
peptide10764	sp|P63132|PO113_HUMAN	44.444	100	1.5	9	9	5	0	1	9	225	233	13.1
peptide10789	sp|P63132|PO113_HUMAN	60	100	0.033	10	10	4	0	1	10	682	691	16.9
peptide11394	sp|P63132|PO113_HUMAN	41.667	100	0.68	12	12	7	0	1	12	761	772	13.9
peptide11736	sp|P63132|PO113_HUMAN	25	100	6.9	16	16	12	0	1	16	743	758	11.9
peptide11827	sp|P63132|PO113_HUMAN	40	100	0.051	15	15	9	0	1	15	877	891	16.9
peptide12058	sp|P63132|PO113_HUMAN	60	100	0.13	19	10	4	0	10	19	329	338	16.2
peptide12058	sp|P63132|PO113_HUMAN	44.444	100	2.1	19	9	5	0	1	9	401	409	13.5
peptide12350	sp|P63132|PO113_HUMAN	41.667	100	0.6	23	12	7	0	12	23	376	387	15
peptide12350	sp|P63132|PO113_HUMAN	34.783	100	1.6	23	23	15	0	1	23	504	526	13.9
peptide12433	sp|P63132|PO113_HUMAN	44.444	100	0.47	9	9	5	0	1	9	476	484	13.9
peptide12710	sp|P63132|PO113_HUMAN	42.857	100	3.7	14	14	8	0	1	14	839	852	12.3
peptide13517	sp|P63132|PO113_HUMAN	37.5	100	1	14	8	5	0	7	14	414	421	13.9
peptide13517	sp|P63132|PO113_HUMAN	30.769	100	1.1	14	13	9	0	1	13	27	39	13.5
peptide13653	sp|P63132|PO113_HUMAN	38.462	100	0.2	16	13	8	0	1	13	339	351	15.4
peptide13653	sp|P63132|PO113_HUMAN	50	100	0.61	16	10	5	0	7	16	843	852	14.2
peptide13773	sp|P63132|PO113_HUMAN	50	100	5.1	12	12	6	0	1	12	464	475	11.9
peptide13827	sp|P63132|PO113_HUMAN	50	100	3	12	12	6	0	1	12	464	475	12.7
peptide14290	sp|P63132|PO113_HUMAN	33.333	100	7.7	18	18	12	0	1	18	894	911	11.9
peptide14673	sp|P63132|PO113_HUMAN	55.556	100	0.32	13	9	4	0	1	9	558	566	14.6
peptide14673	sp|P63132|PO113_HUMAN	36.364	100	1	13	11	7	0	3	13	737	747	13.5
peptide14951	sp|P63132|PO113_HUMAN	37.5	100	1.3	18	16	10	0	2	17	900	915	13.9
peptide14951	sp|P63132|PO113_HUMAN	33.333	100	4.5	18	18	12	0	1	18	910	927	12.7
peptide15284	sp|P63132|PO113_HUMAN	33.333	100	0.08	11	9	6	0	2	10	670	678	15.8
peptide15284	sp|P63132|PO113_HUMAN	36.364	100	2.4	11	11	7	0	1	11	605	615	12.7
peptide15320	sp|P63132|PO113_HUMAN	45.455	100	0.16	11	11	6	0	1	11	427	437	15
peptide15457	sp|P63132|PO113_HUMAN	37.5	100	2.5	15	16	9	1	1	15	191	206	13.1
peptide15503	sp|P63132|PO113_HUMAN	41.667	100	0.17	12	12	7	0	1	12	707	718	15
peptide15933	sp|P63132|PO113_HUMAN	55.556	100	2.4	9	9	4	0	1	9	142	150	12.7
peptide16101	sp|P63132|PO113_HUMAN	42.857	100	0.33	14	14	8	0	1	14	137	150	14.6
peptide16184	sp|P63132|PO113_HUMAN	30.769	100	9.5	13	13	9	0	1	13	122	134	11.5
peptide16193	sp|P63132|PO113_HUMAN	27.778	100	0.15	18	18	13	0	1	18	60	77	15.8
peptide16215	sp|P63132|PO113_HUMAN	35.714	100	0.28	16	14	9	0	1	14	501	514	15
peptide16215	sp|P63132|PO113_HUMAN	50	100	6.8	16	12	6	0	5	16	123	134	11.9
peptide16615	sp|P63132|PO113_HUMAN	50	100	1.4	8	8	4	0	1	8	837	844	13.1
peptide17007	sp|P63132|PO113_HUMAN	50	100	0.73	8	8	4	0	1	8	609	616	13.5
peptide17166	sp|P63132|PO113_HUMAN	40	100	0.063	20	20	9	1	1	20	936	952	16.9
peptide17166	sp|P63132|PO113_HUMAN	54.545	100	0.12	20	11	5	0	10	20	672	682	16.2
peptide17446	sp|P63132|PO113_HUMAN	55.556	100	0.18	9	9	4	0	1	9	170	178	15
peptide17660	sp|P63132|PO113_HUMAN	50	100	1.3	10	10	5	0	1	10	744	753	13.1
peptide18684	sp|P63132|PO113_HUMAN	41.667	100	0.047	19	24	9	2	1	19	132	155	17.3
peptide18947	sp|P63132|PO113_HUMAN	36.364	100	6.2	11	11	7	0	1	11	652	662	11.9
peptide18978	sp|P63132|PO113_HUMAN	41.667	100	0.59	12	12	7	0	1	12	800	811	14.2
peptide19530	sp|P63132|PO113_HUMAN	25	100	6.5	12	12	9	0	1	12	845	856	11.9
peptide19672	sp|P63132|PO113_HUMAN	50	100	0.14	10	10	5	0	1	10	545	554	15
peptide19722	sp|P63132|PO113_HUMAN	38.462	100	1.1	13	13	8	0	1	13	102	114	13.5
peptide19746	sp|P63132|PO113_HUMAN	27.273	100	0.19	11	11	8	0	1	11	360	370	15
peptide19895	sp|P63132|PO113_HUMAN	46.154	100	0.72	13	13	7	0	1	13	934	946	13.9
peptide20115	sp|P63132|PO113_HUMAN	36.842	100	0.34	19	19	10	1	1	19	354	370	15
peptide20136	sp|P63132|PO113_HUMAN	30	100	1.3	20	20	14	0	1	20	900	919	13.9
peptide1116	sp|Q902F9|EN113_HUMAN	60	100	0.53	8	10	2	1	1	8	135	144	13.9
peptide2098	sp|Q902F9|EN113_HUMAN	45.455	100	0.32	11	11	6	0	1	11	589	599	14.6
peptide2432	sp|Q902F9|EN113_HUMAN	40	100	0.071	10	10	6	0	1	10	530	539	15.8
peptide3045	sp|Q902F9|EN113_HUMAN	50	100	2.1	8	8	4	0	1	8	184	191	12.7
peptide3134	sp|Q902F9|EN113_HUMAN	62.5	100	0.39	8	8	3	0	1	8	47	54	14.2
peptide3134	sp|Q902F9|EN113_HUMAN	66.667	100	1.2	8	6	2	0	3	8	33	38	13.1
peptide3491	sp|Q902F9|EN113_HUMAN	44.444	100	2.4	9	9	5	0	1	9	363	371	12.7
peptide4446	sp|Q902F9|EN113_HUMAN	45.455	100	1.6	11	11	6	0	1	11	431	441	13.1
peptide4944	sp|Q902F9|EN113_HUMAN	33.333	100	0.91	15	15	10	0	1	15	202	216	13.9
peptide6483	sp|Q902F9|EN113_HUMAN	28.571	100	3.3	21	21	15	0	1	21	199	219	13.1
peptide7200	sp|Q902F9|EN113_HUMAN	40	100	0.86	10	10	6	0	1	10	214	223	13.5
peptide7649	sp|Q902F9|EN113_HUMAN	41.667	100	0.72	17	12	7	0	4	15	502	513	14.2
peptide7649	sp|Q902F9|EN113_HUMAN	23.529	100	2.3	17	17	13	0	1	17	405	421	13.1
peptide8436	sp|Q902F9|EN113_HUMAN	45.455	100	1.6	11	11	6	0	1	11	431	441	13.1
peptide9051	sp|Q902F9|EN113_HUMAN	54.545	100	0.37	11	11	5	0	1	11	219	229	14.2
peptide9219	sp|Q902F9|EN113_HUMAN	60	100	0.016	10	10	4	0	1	10	105	114	17.7
peptide9303	sp|Q902F9|EN113_HUMAN	33.333	100	2.9	15	15	10	0	1	15	317	331	12.7
peptide9798	sp|Q902F9|EN113_HUMAN	42.857	100	3.2	7	7	4	0	1	7	363	369	12.3
peptide9834	sp|Q902F9|EN113_HUMAN	45.455	100	1.1	11	11	6	0	1	11	181	191	13.5
peptide10107	sp|Q902F9|EN113_HUMAN	41.667	100	0.065	12	12	7	0	1	12	269	280	16.2
peptide10324	sp|Q902F9|EN113_HUMAN	50	100	0.49	12	14	5	1	1	12	293	306	14.2
peptide10325	sp|Q902F9|EN113_HUMAN	41.667	100	3.6	12	12	7	0	1	12	597	608	12.3
peptide10785	sp|Q902F9|EN113_HUMAN	31.579	100	1	19	19	13	0	1	19	197	215	14.2
peptide10790	sp|Q902F9|EN113_HUMAN	33.333	100	1.2	12	12	8	0	1	12	133	144	13.5
peptide12611	sp|Q902F9|EN113_HUMAN	21.739	100	0.23	23	23	18	0	1	23	246	268	15.8
peptide12751	sp|Q902F9|EN113_HUMAN	54.545	100	0.018	11	11	5	0	1	11	391	401	17.7
peptide12924	sp|Q902F9|EN113_HUMAN	55.556	100	0.46	9	9	4	0	1	9	293	301	13.9
peptide12930	sp|Q902F9|EN113_HUMAN	55.556	100	0.46	9	9	4	0	1	9	293	301	13.9
peptide13228	sp|Q902F9|EN113_HUMAN	42.857	100	0.36	14	14	8	0	1	14	508	521	14.6
peptide13500	sp|Q902F9|EN113_HUMAN	21.429	100	0.4	14	14	11	0	1	14	504	517	14.6
peptide14262	sp|Q902F9|EN113_HUMAN	40	100	0.33	10	10	6	0	1	10	544	553	14.2
peptide18570	sp|Q902F9|EN113_HUMAN	66.667	100	0.44	6	6	2	0	1	6	139	144	13.9
peptide19144	sp|Q902F9|EN113_HUMAN	50	100	2.3	10	10	5	0	1	10	220	229	12.7
peptide19364	sp|Q902F9|EN113_HUMAN	37.5	100	0.23	16	16	10	0	1	16	531	546	15
peptide19927	sp|Q902F9|EN113_HUMAN	29.412	100	0.99	18	17	12	0	1	17	613	629	13.9
peptide19927	sp|Q902F9|EN113_HUMAN	50	100	1.1	18	6	3	0	13	18	500	505	13.9
peptide19964	sp|Q902F9|EN113_HUMAN	50	100	0.033	10	10	5	0	1	10	220	229	16.9
peptide20107	sp|Q902F9|EN113_HUMAN	62.5	100	0.052	8	8	3	0	1	8	548	555	15.8
peptide20314	sp|Q902F9|EN113_HUMAN	66.667	100	0.069	12	12	4	0	1	12	373	384	16.2
peptide3134	sp|P61574|RE113_HUMAN	62.5	100	0.77	8	8	3	0	1	8	47	54	13.5
peptide3134	sp|P61574|RE113_HUMAN	66.667	100	1	8	6	2	0	3	8	33	38	13.5
peptide4203	sp|P61574|RE113_HUMAN	42.857	100	6.3	14	14	8	0	1	14	83	96	11.9
peptide3869	sp|P62684|GA113_HUMAN	77.778	97	0.17	32	9	2	0	9	17	232	240	16.9
peptide3869	sp|P62684|GA113_HUMAN	50	97	0.27	32	16	8	0	16	31	613	628	16.2
peptide3869	sp|P62684|GA113_HUMAN	50	97	1.1	32	14	7	0	1	14	615	628	14.6
peptide3869	sp|P62684|GA113_HUMAN	45.455	97	2.7	32	11	6	0	7	17	296	306	13.9
peptide3869	sp|P62684|GA113_HUMAN	46.154	97	3.6	32	13	7	0	7	19	653	665	13.5
peptide13623	sp|P62684|GA113_HUMAN	28.571	97	0.5	29	21	15	0	1	21	140	160	15.4
peptide13623	sp|P62684|GA113_HUMAN	35.294	97	5.4	29	17	11	0	12	28	215	231	13.1
peptide13623	sp|P62684|GA113_HUMAN	35.714	97	6.5	29	14	9	0	13	26	502	515	12.7
peptide16162	sp|P63132|PO113_HUMAN	27.586	97	0.98	30	29	19	1	2	30	539	565	14.6
peptide347	sp|P62684|GA113_HUMAN	25	96	2.9	24	16	12	0	2	17	580	595	13.5
peptide347	sp|P62684|GA113_HUMAN	37.5	96	3.8	24	8	5	0	17	24	111	118	13.1
peptide9943	sp|P62684|GA113_HUMAN	50	96	0.69	24	12	6	0	1	12	613	624	14.6
peptide9943	sp|P62684|GA113_HUMAN	43.75	96	1.4	24	16	9	0	5	20	603	618	13.9
peptide9943	sp|P62684|GA113_HUMAN	55.556	96	5.8	24	9	4	0	15	23	232	240	12.7
peptide11170	sp|P62684|GA113_HUMAN	50	96	0.16	26	10	5	0	16	25	216	225	16.5
peptide11170	sp|P62684|GA113_HUMAN	71.429	96	3.3	26	7	2	0	19	25	655	661	13.5
peptide11170	sp|P62684|GA113_HUMAN	33.333	96	9.3	26	15	10	0	1	15	91	105	12.3
peptide14815	sp|P62684|GA113_HUMAN	42.857	96	1.9	24	14	8	0	9	22	605	618	13.9
peptide14815	sp|P62684|GA113_HUMAN	45.455	96	3.2	24	11	6	0	13	23	176	186	13.1
peptide14815	sp|P62684|GA113_HUMAN	45.455	96	5	24	11	6	0	2	12	613	623	12.7
peptide14815	sp|P62684|GA113_HUMAN	45.455	96	9	24	11	6	0	1	11	607	617	12.3
peptide14817	sp|P62684|GA113_HUMAN	42.857	96	1.9	23	14	8	0	8	21	605	618	13.9
peptide14817	sp|P62684|GA113_HUMAN	45.455	96	2.9	23	11	6	0	12	22	176	186	13.1
peptide14817	sp|P62684|GA113_HUMAN	45.455	96	4.5	23	11	6	0	1	11	613	623	12.7
peptide14865	sp|P62684|GA113_HUMAN	47.619	96	0.11	24	21	10	1	2	22	641	660	16.5
peptide14865	sp|P62684|GA113_HUMAN	62.5	96	1.6	24	8	3	0	17	24	252	259	13.9
peptide14865	sp|P62684|GA113_HUMAN	55.556	96	4.5	24	9	4	0	12	20	216	224	13.1
peptide1186	sp|P63132|PO113_HUMAN	27.273	96	9.5	23	22	16	0	2	23	163	184	11.9
peptide1630	sp|P63132|PO113_HUMAN	27.273	96	9.5	23	22	16	0	2	23	163	184	11.9
peptide1652	sp|P63132|PO113_HUMAN	31.25	96	1.1	25	16	11	0	1	16	110	125	14.2
peptide1652	sp|P63132|PO113_HUMAN	21.053	96	5.7	25	19	15	0	6	24	448	466	12.7
peptide1859	sp|P63132|PO113_HUMAN	27.273	96	9.5	23	22	16	0	2	23	163	184	11.9
peptide2623	sp|P63132|PO113_HUMAN	27.273	96	9.5	23	22	16	0	2	23	163	184	11.9
peptide8103	sp|P63132|PO113_HUMAN	34.783	96	1.3	24	23	15	0	1	23	523	545	14.2
peptide9960	sp|P63132|PO113_HUMAN	35.714	96	4.9	24	14	9	0	11	24	69	82	12.7
peptide9960	sp|P63132|PO113_HUMAN	27.273	96	6.7	24	11	8	0	2	12	814	824	12.3
peptide10621	sp|P63132|PO113_HUMAN	54.545	96	1	23	11	5	0	11	21	16	26	14.2
peptide10621	sp|P63132|PO113_HUMAN	55.556	96	2.8	23	9	4	0	8	16	145	153	13.5
peptide10621	sp|P63132|PO113_HUMAN	32	96	2.8	23	25	12	1	4	23	19	43	13.5
peptide10621	sp|P63132|PO113_HUMAN	30.769	96	7.4	23	13	9	0	2	14	309	321	12.3
peptide14081	sp|P63132|PO113_HUMAN	34.783	96	0.068	24	23	15	0	1	23	711	733	17.3
peptide16316	sp|P63132|PO113_HUMAN	54.545	96	1	23	11	5	0	11	21	16	26	14.2
peptide16316	sp|P63132|PO113_HUMAN	55.556	96	2.8	23	9	4	0	8	16	145	153	13.5
peptide16316	sp|P63132|PO113_HUMAN	32	96	2.8	23	25	12	1	4	23	19	43	13.5
peptide16316	sp|P63132|PO113_HUMAN	30.769	96	7.4	23	13	9	0	2	14	309	321	12.3
peptide20334	sp|P63132|PO113_HUMAN	40	96	0.71	25	15	9	0	1	15	339	353	14.6
peptide20334	sp|P63132|PO113_HUMAN	31.25	96	1.7	25	16	11	0	9	24	806	821	13.9
peptide9389	sp|Q902F9|EN113_HUMAN	26.667	96	0.91	24	30	15	1	2	24	547	576	14.6
peptide2664	sp|P62684|GA113_HUMAN	28.571	95	0.83	22	21	15	0	1	21	140	160	14.6
peptide2694	sp|P62684|GA113_HUMAN	40.909	95	3.9	21	22	10	2	1	20	213	233	12.7
peptide4213	sp|P62684|GA113_HUMAN	25	95	6.5	21	20	15	0	2	21	300	319	12.3
peptide6448	sp|P62684|GA113_HUMAN	40	95	1	21	20	12	0	2	21	244	263	14.2
peptide6448	sp|P62684|GA113_HUMAN	45.455	95	4.1	21	11	6	0	9	19	613	623	12.7
peptide6448	sp|P62684|GA113_HUMAN	41.667	95	9.1	21	12	7	0	6	17	206	217	11.9
peptide8460	sp|P62684|GA113_HUMAN	33.333	95	0.91	19	18	12	0	2	19	599	616	14.2
peptide8481	sp|P62684|GA113_HUMAN	40	95	0.36	21	20	7	1	1	20	570	584	15
peptide8924	sp|P62684|GA113_HUMAN	42.105	95	0.52	20	19	10	1	1	19	174	191	14.6
peptide14120	sp|P62684|GA113_HUMAN	38.095	95	6.6	22	21	13	0	2	22	142	162	12.3
peptide14126	sp|P62684|GA113_HUMAN	38.095	95	6.6	22	21	13	0	2	22	142	162	12.3
peptide14814	sp|P62684|GA113_HUMAN	50	95	2.6	19	12	6	0	2	13	290	301	13.1
peptide14814	sp|P62684|GA113_HUMAN	50	95	3.3	19	10	5	0	6	15	613	622	13.1
peptide14814	sp|P62684|GA113_HUMAN	100	95	4.6	19	4	0	0	16	19	269	272	12.7
peptide15949	sp|P62684|GA113_HUMAN	33.333	95	0.55	19	18	12	0	2	19	246	263	14.6
peptide15949	sp|P62684|GA113_HUMAN	58.333	95	0.9	19	12	5	0	3	14	290	301	14.2
peptide18340	sp|P62684|GA113_HUMAN	31.579	95	2	20	19	13	0	1	19	396	414	13.5
peptide19026	sp|P62684|GA113_HUMAN	44.444	95	0.038	20	18	10	0	1	18	227	244	17.7
peptide19026	sp|P62684|GA113_HUMAN	31.579	95	9.1	20	19	13	0	1	19	611	629	11.9
peptide682	sp|P63132|PO113_HUMAN	30	95	0.25	21	20	14	0	1	20	761	780	15.4
peptide3089	sp|P63132|PO113_HUMAN	66.667	95	0.009	21	9	3	0	1	9	626	634	19.6
peptide3089	sp|P63132|PO113_HUMAN	50	95	0.88	21	6	3	0	15	20	60	65	14.2
peptide3089	sp|P63132|PO113_HUMAN	29.412	95	7.6	21	17	12	0	2	18	190	206	12.3
peptide3303	sp|P63132|PO113_HUMAN	31.579	95	0.31	20	19	13	0	1	19	762	780	15.4
peptide3484	sp|P63132|PO113_HUMAN	30	95	0.25	21	20	14	0	1	20	761	780	15.4
peptide4786	sp|P63132|PO113_HUMAN	50	95	0.078	21	16	8	0	6	21	308	323	16.9
peptide4786	sp|P63132|PO113_HUMAN	57.143	95	2.8	21	7	3	0	2	8	834	840	13.1
peptide7838	sp|P63132|PO113_HUMAN	35	95	1.2	21	20	13	0	1	20	793	812	13.9
peptide11246	sp|P63132|PO113_HUMAN	47.619	95	0.007	21	21	10	1	1	20	236	256	19.6
peptide12224	sp|P63132|PO113_HUMAN	30.769	95	0.97	21	26	12	1	1	20	44	69	14.2
peptide12840	sp|P63132|PO113_HUMAN	42.105	95	0.49	20	19	7	1	1	19	729	743	14.6
peptide12840	sp|P63132|PO113_HUMAN	57.143	95	0.61	20	7	3	0	10	16	167	173	14.6
peptide12840	sp|P63132|PO113_HUMAN	38.462	95	2.9	20	13	8	0	2	14	674	686	13.1
peptide13789	sp|P63132|PO113_HUMAN	32	95	6.5	21	25	12	1	2	21	683	707	12.3
peptide14593	sp|P63132|PO113_HUMAN	33.333	95	5.8	19	18	12	0	2	19	806	823	12.3
peptide15031	sp|P63132|PO113_HUMAN	38.889	95	0.28	19	18	11	0	1	18	933	950	15.4
peptide19463	sp|P63132|PO113_HUMAN	27.778	95	1.5	19	18	13	0	2	19	772	789	13.9
peptide663	sp|Q902F9|EN113_HUMAN	38.889	95	0.9	21	18	11	0	2	19	496	513	14.2
peptide663	sp|Q902F9|EN113_HUMAN	23.529	95	2.9	21	17	13	0	5	21	405	421	13.1
peptide2551	sp|Q902F9|EN113_HUMAN	33.333	95	5.5	19	18	12	0	2	19	37	54	12.3
peptide3371	sp|Q902F9|EN113_HUMAN	33.333	95	5.5	19	18	12	0	2	19	37	54	12.3
peptide5364	sp|Q902F9|EN113_HUMAN	44.444	95	0.11	19	18	10	0	1	18	588	605	16.2
peptide12083	sp|Q902F9|EN113_HUMAN	38.889	95	0.83	19	18	11	0	1	18	271	288	14.2
peptide12366	sp|Q902F9|EN113_HUMAN	30	95	4.9	21	20	14	0	1	20	277	296	12.7
peptide17138	sp|Q902F9|EN113_HUMAN	35	95	0.075	21	20	12	1	1	20	432	450	16.9
peptide19049	sp|Q902F9|EN113_HUMAN	27.778	95	0.86	19	18	13	0	1	18	23	40	14.2
peptide19498	sp|Q902F9|EN113_HUMAN	30.769	95	0.17	20	13	9	0	1	13	344	356	15.8
peptide19498	sp|Q902F9|EN113_HUMAN	46.667	95	0.96	20	15	8	0	5	19	237	251	14.2
peptide20115	sp|Q902F9|EN113_HUMAN	27.778	95	1.1	19	18	13	0	1	18	236	253	13.9
peptide19049	sp|P61574|RE113_HUMAN	27.778	95	2	19	18	13	0	1	18	23	40	13.5
peptide1503	sp|P62684|GA113_HUMAN	41.176	94	0.56	18	17	10	0	2	18	428	444	14.6
peptide2242	sp|P62684|GA113_HUMAN	33.333	94	9	16	15	10	0	2	16	621	635	11.5
peptide2631	sp|P62684|GA113_HUMAN	26.667	94	9	16	15	11	0	2	16	479	493	11.5
peptide3028	sp|P62684|GA113_HUMAN	29.412	94	0.76	18	17	12	0	2	18	535	551	14.2
peptide3731	sp|P62684|GA113_HUMAN	41.176	94	0.071	18	17	10	0	2	18	441	457	16.5
peptide4682	sp|P62684|GA113_HUMAN	40	94	4.5	16	15	9	0	2	16	330	344	12.3
peptide5600	sp|P62684|GA113_HUMAN	64.286	94	0.48	17	14	4	1	3	16	232	244	14.6
peptide5600	sp|P62684|GA113_HUMAN	53.846	94	1.6	17	13	6	0	4	16	222	234	13.5
peptide5600	sp|P62684|GA113_HUMAN	66.667	94	2	17	9	3	0	1	9	237	245	13.1
peptide5600	sp|P62684|GA113_HUMAN	50	94	6.5	17	8	4	0	9	16	445	452	11.9
peptide5600	sp|P62684|GA113_HUMAN	46.154	94	8	17	13	7	0	1	13	178	190	11.9
peptide5675	sp|P62684|GA113_HUMAN	50	94	0.097	17	16	8	0	1	16	461	476	16.2
peptide7632	sp|P62684|GA113_HUMAN	36.364	94	0.44	16	11	7	0	5	15	207	217	14.6
peptide7632	sp|P62684|GA113_HUMAN	20	94	6.6	16	15	12	0	1	15	417	431	11.9
peptide8400	sp|P62684|GA113_HUMAN	41.176	94	0.071	18	17	10	0	2	18	441	457	16.5
peptide10028	sp|P62684|GA113_HUMAN	40	94	1.6	18	20	9	1	2	18	244	263	13.5
peptide10028	sp|P62684|GA113_HUMAN	45.455	94	2.7	18	11	6	0	6	16	613	623	13.1
peptide10028	sp|P62684|GA113_HUMAN	41.667	94	8.4	18	12	7	0	3	14	206	217	11.9
peptide11371	sp|P62684|GA113_HUMAN	46.667	94	0.64	36	15	8	0	3	17	185	199	15.4
peptide11371	sp|P62684|GA113_HUMAN	26.316	94	7.7	36	19	14	0	18	36	430	448	13.1
peptide13117	sp|P62684|GA113_HUMAN	35.294	94	6.9	18	17	11	0	2	18	500	516	11.9
peptide14195	sp|P62684|GA113_HUMAN	30.769	94	0.83	16	13	9	0	3	15	218	230	13.9
peptide14195	sp|P62684|GA113_HUMAN	50	94	6.2	16	8	4	0	1	8	284	291	11.9
peptide17058	sp|P62684|GA113_HUMAN	26.667	94	5.2	16	15	11	0	1	15	139	153	12.3
peptide17062	sp|P62684|GA113_HUMAN	26.667	94	5.2	16	15	11	0	1	15	139	153	12.3
peptide18512	sp|P62684|GA113_HUMAN	33.333	94	3.3	16	15	10	0	2	16	606	620	12.7
peptide5122	sp|P63121|VP113_HUMAN	40	94	1.6	16	15	9	0	1	15	104	118	13.5
peptide8342	sp|P63121|VP113_HUMAN	41.176	94	1.4	18	17	10	0	1	17	65	81	13.9
peptide407	sp|P63132|PO113_HUMAN	29.412	94	7.1	18	17	12	0	1	17	48	64	11.9
peptide2881	sp|P63132|PO113_HUMAN	40	94	0.022	16	15	9	0	2	16	862	876	18.1
peptide5248	sp|P63132|PO113_HUMAN	40	94	0.12	16	15	9	0	2	16	758	772	15.8
peptide8284	sp|P63132|PO113_HUMAN	55.556	94	0.2	17	9	4	0	8	16	707	715	15.4
peptide8284	sp|P63132|PO113_HUMAN	25	94	0.25	17	16	12	0	2	17	904	919	15.4
peptide9607	sp|P63132|PO113_HUMAN	40	94	0.31	16	15	9	0	1	15	562	576	15
peptide10803	sp|P63132|PO113_HUMAN	23.529	94	4.3	18	17	13	0	2	18	134	150	12.7
peptide11013	sp|P63132|PO113_HUMAN	40	94	0.23	16	15	9	0	2	16	461	475	15
peptide12346	sp|P63132|PO113_HUMAN	35.294	94	0.015	18	17	11	0	2	18	936	952	18.5
peptide12668	sp|P63132|PO113_HUMAN	46.667	94	0.019	16	15	8	0	2	16	192	206	18.1
peptide14235	sp|P63132|PO113_HUMAN	42.857	94	0.036	16	14	8	0	2	15	222	235	17.3
peptide14235	sp|P63132|PO113_HUMAN	100	94	0.71	16	5	0	0	12	16	310	314	14.2
peptide15348	sp|P63132|PO113_HUMAN	25	94	7.3	17	16	12	0	2	17	62	77	11.9
peptide15472	sp|P63132|PO113_HUMAN	37.5	94	2.4	16	16	9	1	2	16	191	206	13.1
peptide18873	sp|P63132|PO113_HUMAN	46.154	94	0.43	18	13	5	1	6	18	936	946	14.6
peptide18873	sp|P63132|PO113_HUMAN	35.294	94	1.6	18	17	11	0	2	18	788	804	13.5
peptide2331	sp|Q902F9|EN113_HUMAN	20	94	5.5	16	15	12	0	2	16	387	401	12.3
peptide2331	sp|Q902F9|EN113_HUMAN	45.455	94	8.2	16	11	6	0	4	14	39	49	11.9
peptide4682	sp|Q902F9|EN113_HUMAN	33.333	94	2	16	15	10	0	2	16	145	159	13.1
peptide6322	sp|Q902F9|EN113_HUMAN	41.667	94	0.72	18	12	7	0	5	16	502	513	14.2
peptide6322	sp|Q902F9|EN113_HUMAN	23.529	94	2.2	18	17	13	0	2	18	405	421	13.1
peptide13377	sp|Q902F9|EN113_HUMAN	47.059	94	0.14	18	17	9	0	1	17	589	605	15.8
peptide15226	sp|Q902F9|EN113_HUMAN	40	94	0.74	16	15	9	0	2	16	209	223	14.2
peptide18545	sp|Q902F9|EN113_HUMAN	40	94	0.5	16	15	9	0	2	16	222	236	14.6
peptide19476	sp|Q902F9|EN113_HUMAN	44.444	94	0.25	18	9	5	0	2	10	354	362	15.4
peptide19476	sp|Q902F9|EN113_HUMAN	66.667	94	2.1	18	6	2	0	2	7	610	615	13.5
peptide19476	sp|Q902F9|EN113_HUMAN	29.412	94	3.4	18	17	12	0	1	17	580	596	12.7
peptide19941	sp|Q902F9|EN113_HUMAN	30.769	94	0.25	17	13	9	0	2	14	274	286	15.4
peptide19941	sp|Q902F9|EN113_HUMAN	38.462	94	0.38	17	13	8	0	5	17	372	384	15
peptide13823	sp|P61574|RE113_HUMAN	35.294	94	6.3	18	17	11	0	1	17	89	105	12.3
peptide851	sp|P62684|GA113_HUMAN	80	93	0.3	14	5	1	0	2	6	545	549	14.6
peptide851	sp|P62684|GA113_HUMAN	46.154	93	0.33	14	13	7	0	2	14	653	665	14.6
peptide1174	sp|P62684|GA113_HUMAN	100	93	0.32	14	5	0	0	2	6	486	490	14.6
peptide1174	sp|P62684|GA113_HUMAN	50	93	4	14	8	4	0	7	14	59	66	12.3
peptide1747	sp|P62684|GA113_HUMAN	50	93	0.19	15	14	7	0	1	14	615	628	15.4
peptide2946	sp|P62684|GA113_HUMAN	62.5	93	1.5	14	8	3	0	1	8	447	454	13.5
peptide2946	sp|P62684|GA113_HUMAN	30	93	7.9	14	10	7	0	4	13	650	659	11.5
peptide3564	sp|P62684|GA113_HUMAN	38.462	93	0.16	14	13	8	0	2	14	233	245	15.4
peptide3765	sp|P62684|GA113_HUMAN	35.714	93	0.42	15	14	9	0	1	14	425	438	14.6
peptide7081	sp|P62684|GA113_HUMAN	50	93	0.029	15	14	7	0	1	14	455	468	17.7
peptide7868	sp|P62684|GA113_HUMAN	46.154	93	2	14	13	7	0	1	13	297	309	13.1
peptide11810	sp|P62684|GA113_HUMAN	30.769	93	1.7	14	13	9	0	1	13	266	278	13.1
peptide12082	sp|P62684|GA113_HUMAN	100	93	0.32	14	4	0	0	2	5	657	660	14.6
peptide12082	sp|P62684|GA113_HUMAN	41.667	93	0.68	14	12	7	0	3	14	433	444	14.2
peptide12122	sp|P62684|GA113_HUMAN	45.455	93	2.2	14	11	6	0	4	14	613	623	13.1
peptide12122	sp|P62684|GA113_HUMAN	66.667	93	4.2	14	6	2	0	9	14	658	663	12.3
peptide12122	sp|P62684|GA113_HUMAN	50	93	5.1	14	10	5	0	2	11	214	223	12.3
peptide13667	sp|P62684|GA113_HUMAN	42.857	93	1.1	15	14	8	0	2	15	431	444	13.9
peptide14871	sp|P62684|GA113_HUMAN	42.857	93	0.62	15	14	8	0	2	15	331	344	14.2
peptide17358	sp|P62684|GA113_HUMAN	30.769	93	6.6	14	13	9	0	2	14	458	470	11.9
peptide17556	sp|P62684|GA113_HUMAN	71.429	93	0.58	15	7	2	0	8	14	185	191	14.2
peptide17556	sp|P62684|GA113_HUMAN	66.667	93	0.81	15	6	2	0	8	13	237	242	13.9
peptide17556	sp|P62684|GA113_HUMAN	40	93	8.9	15	10	6	0	1	10	266	275	11.5
peptide11584	sp|P63121|VP113_HUMAN	42.857	93	1.1	15	14	8	0	1	14	47	60	13.9
peptide198	sp|P63132|PO113_HUMAN	38.462	93	3.9	14	13	8	0	1	13	938	950	12.3
peptide477	sp|P63132|PO113_HUMAN	38.462	93	0.14	14	13	8	0	2	14	239	251	15.4
peptide864	sp|P63132|PO113_HUMAN	26.923	93	3.1	28	26	19	0	2	27	806	831	13.5
peptide1125	sp|P63132|PO113_HUMAN	57.143	93	0.19	27	14	4	1	13	26	12	23	16.2
peptide1125	sp|P63132|PO113_HUMAN	38.462	93	0.25	27	13	8	0	2	14	100	112	16.2
peptide2262	sp|P63132|PO113_HUMAN	38.462	93	7.3	14	13	8	0	2	14	315	327	11.9
peptide5131	sp|P63132|PO113_HUMAN	35.714	93	0.31	15	14	9	0	1	14	934	947	15
peptide6285	sp|P63132|PO113_HUMAN	46.154	93	1.1	14	13	7	0	1	13	830	842	13.5
peptide8211	sp|P63132|PO113_HUMAN	80	93	0.66	14	5	1	0	9	13	764	768	14.2
peptide8211	sp|P63132|PO113_HUMAN	23.077	93	5.7	14	13	10	0	1	13	125	137	11.9
peptide10287	sp|P63132|PO113_HUMAN	37.037	93	0.92	29	27	13	1	1	27	97	119	14.6
peptide12125	sp|P63132|PO113_HUMAN	35.714	93	0.61	15	14	9	0	2	15	144	157	14.2
peptide14792	sp|P63132|PO113_HUMAN	21.429	93	6.7	15	14	11	0	2	15	848	861	11.9
peptide15441	sp|P63132|PO113_HUMAN	42.857	93	0.08	15	14	8	0	2	15	171	184	16.2
peptide16177	sp|P63132|PO113_HUMAN	35.294	93	0.87	15	17	8	1	1	14	614	630	13.9
peptide16358	sp|P63132|PO113_HUMAN	38.462	93	0.85	14	13	8	0	1	13	519	531	13.9
peptide16624	sp|P63132|PO113_HUMAN	100	93	0.35	14	5	0	0	10	14	310	314	14.6
peptide16624	sp|P63132|PO113_HUMAN	41.667	93	0.51	14	12	7	0	2	13	224	235	14.2
peptide18145	sp|P63132|PO113_HUMAN	46.154	93	0.05	14	13	7	0	1	13	406	418	16.5
peptide19133	sp|P63132|PO113_HUMAN	38.462	93	0.023	14	13	8	0	2	14	127	139	17.7
peptide1304	sp|Q902F9|EN113_HUMAN	50	93	0.3	14	6	3	0	2	7	116	121	15
peptide1304	sp|Q902F9|EN113_HUMAN	50	93	4.5	14	10	5	0	1	10	307	316	12.3
peptide1304	sp|Q902F9|EN113_HUMAN	38.462	93	7.7	14	13	8	0	1	13	262	274	11.9
peptide3970	sp|Q902F9|EN113_HUMAN	38.462	93	0.7	14	13	8	0	1	13	598	610	14.2
peptide4904	sp|Q902F9|EN113_HUMAN	44.444	93	1.3	15	9	5	0	1	9	222	230	13.5
peptide4904	sp|Q902F9|EN113_HUMAN	55.556	93	3.7	15	9	4	0	6	14	161	169	12.7
peptide5905	sp|Q902F9|EN113_HUMAN	32.353	93	0.26	45	34	17	1	3	30	141	174	16.9
peptide5905	sp|Q902F9|EN113_HUMAN	40	93	4.4	45	10	6	0	35	44	302	311	13.9
peptide5905	sp|Q902F9|EN113_HUMAN	38.462	93	8.9	45	13	8	0	29	41	135	147	13.1
peptide7617	sp|Q902F9|EN113_HUMAN	66.667	93	2.5	29	6	2	0	4	9	447	452	13.9
peptide7617	sp|Q902F9|EN113_HUMAN	34.483	93	2.6	29	29	17	1	2	28	220	248	13.9
peptide9814	sp|Q902F9|EN113_HUMAN	46.154	93	0.27	14	13	6	1	1	13	135	146	15
peptide10270	sp|Q902F9|EN113_HUMAN	35.714	93	0.77	15	14	9	0	1	14	157	170	13.9
peptide12724	sp|Q902F9|EN113_HUMAN	26.923	93	0.97	28	26	19	0	2	27	501	526	14.6
peptide13509	sp|Q902F9|EN113_HUMAN	36.364	93	5.2	14	11	7	0	3	13	385	395	12.3
peptide13509	sp|Q902F9|EN113_HUMAN	44.444	93	9.4	14	9	5	0	1	9	445	453	11.5
peptide13627	sp|Q902F9|EN113_HUMAN	38.462	93	9.7	14	13	8	0	2	14	32	44	11.5
peptide14334	sp|Q902F9|EN113_HUMAN	46.154	93	0.27	14	13	6	1	1	13	135	146	15
peptide14580	sp|Q902F9|EN113_HUMAN	35.714	93	2.6	15	14	9	0	1	14	253	266	12.7
peptide14955	sp|Q902F9|EN113_HUMAN	53.846	93	0.27	14	13	6	0	2	14	56	68	15
peptide16299	sp|Q902F9|EN113_HUMAN	30.769	93	0.81	14	13	9	0	1	13	566	578	13.9
peptide13182	sp|P61574|RE113_HUMAN	42.857	93	2.5	15	14	8	0	1	14	91	104	13.1
peptide14955	sp|P61574|RE113_HUMAN	53.846	93	0.65	14	13	6	0	2	14	56	68	14.2
peptide958	sp|P62684|GA113_HUMAN	36.364	92	0.59	12	11	7	0	1	11	225	235	14.2
peptide1849	sp|P62684|GA113_HUMAN	45.455	92	0.5	12	11	6	0	2	12	239	249	14.2
peptide3333	sp|P62684|GA113_HUMAN	41.667	92	2.3	13	12	7	0	1	12	289	300	12.7
peptide3963	sp|P62684|GA113_HUMAN	36.364	92	3.1	12	11	7	0	2	12	384	394	12.7
peptide4133	sp|P62684|GA113_HUMAN	41.667	92	3.8	13	12	7	0	2	13	295	306	12.3
peptide4296	sp|P62684|GA113_HUMAN	50	92	0.85	25	12	6	0	1	12	613	624	14.6
peptide4296	sp|P62684|GA113_HUMAN	43.75	92	1.8	25	16	9	0	5	20	603	618	13.9
peptide4296	sp|P62684|GA113_HUMAN	55.556	92	6	25	9	4	0	15	23	232	240	12.7
peptide4558	sp|P62684|GA113_HUMAN	50	92	8.7	13	12	6	0	2	13	446	457	11.5
peptide4733	sp|P62684|GA113_HUMAN	45.455	92	1.1	12	11	6	0	1	11	468	478	13.5
peptide8207	sp|P62684|GA113_HUMAN	41.667	92	3.1	13	12	7	0	1	12	202	213	12.7
peptide9130	sp|P62684|GA113_HUMAN	33.333	92	5.1	13	12	8	0	1	12	427	438	11.9
peptide9608	sp|P62684|GA113_HUMAN	40	92	2.1	13	10	6	0	2	11	181	190	13.1
peptide9608	sp|P62684|GA113_HUMAN	62.5	92	4.8	13	8	3	0	6	13	242	249	12.3
peptide10489	sp|P62684|GA113_HUMAN	64.286	92	0.74	24	14	4	1	3	16	232	244	14.6
peptide10489	sp|P62684|GA113_HUMAN	100	92	1	24	6	0	0	18	23	635	640	14.2
peptide10489	sp|P62684|GA113_HUMAN	53.846	92	2.9	24	13	6	0	4	16	222	234	13.5
peptide10489	sp|P62684|GA113_HUMAN	66.667	92	4.3	24	9	3	0	1	9	237	245	13.1
peptide10489	sp|P62684|GA113_HUMAN	50	92	8.1	24	10	5	0	1	10	178	187	12.3
peptide12287	sp|P62684|GA113_HUMAN	66.667	92	0.32	13	9	3	0	5	13	658	666	14.6
peptide12287	sp|P62684|GA113_HUMAN	36.364	92	0.62	13	11	7	0	2	12	211	221	14.2
peptide12978	sp|P62684|GA113_HUMAN	54.545	92	0.64	12	11	5	0	2	12	23	33	13.9
peptide13073	sp|P62684|GA113_HUMAN	36.364	92	0.45	12	11	7	0	1	11	465	475	14.2
peptide14553	sp|P62684|GA113_HUMAN	25	92	2.8	25	16	12	0	2	17	580	595	13.5
peptide14553	sp|P62684|GA113_HUMAN	37.5	92	3.7	25	8	5	0	17	24	111	118	13.1
peptide16513	sp|P62684|GA113_HUMAN	54.545	92	1.7	12	11	5	0	1	11	207	217	13.1
peptide18755	sp|P62684|GA113_HUMAN	75	92	0.33	12	8	2	0	3	10	232	239	14.6
peptide18755	sp|P62684|GA113_HUMAN	66.667	92	1.2	12	9	3	0	1	9	237	245	13.5
peptide18755	sp|P62684|GA113_HUMAN	66.667	92	4.8	12	6	2	0	6	11	658	663	11.9
peptide18755	sp|P62684|GA113_HUMAN	50	92	4.9	12	10	5	0	1	10	178	187	11.9
peptide4830	sp|P63121|VP113_HUMAN	33.333	92	1.8	13	12	8	0	2	13	136	147	13.1
peptide11163	sp|P63121|VP113_HUMAN	33.333	92	2.2	13	12	8	0	2	13	127	138	13.1
peptide14108	sp|P63121|VP113_HUMAN	36.364	92	4.6	12	11	7	0	1	11	54	64	12.3
peptide16033	sp|P63121|VP113_HUMAN	42.857	92	2.7	13	14	6	1	2	13	104	117	12.7
peptide484	sp|P63132|PO113_HUMAN	36.364	92	0.21	24	22	12	1	3	24	351	370	15.8
peptide1870	sp|P63132|PO113_HUMAN	54.545	92	0.92	12	11	5	0	2	12	104	114	13.5
peptide3092	sp|P63132|PO113_HUMAN	54.545	92	0.2	12	11	5	0	1	11	15	25	15
peptide3155	sp|P63132|PO113_HUMAN	41.667	92	6.3	13	12	7	0	2	13	844	855	11.9
peptide3247	sp|P63132|PO113_HUMAN	41.667	92	0.69	13	12	7	0	2	13	761	772	13.9
peptide3646	sp|P63132|PO113_HUMAN	45.455	92	0.016	12	11	6	0	1	11	929	939	18.1
peptide5288	sp|P63132|PO113_HUMAN	33.333	92	0.3	38	24	16	0	2	25	393	416	16.5
peptide5288	sp|P63132|PO113_HUMAN	30.435	92	5.4	38	23	16	0	14	36	858	880	13.5
peptide5496	sp|P63132|PO113_HUMAN	26.316	92	4.2	37	19	14	0	13	31	347	365	13.5
peptide5496	sp|P63132|PO113_HUMAN	33.333	92	9.1	37	12	8	0	26	37	71	82	12.7
peptide5496	sp|P63132|PO113_HUMAN	44.444	92	9.4	37	9	5	0	3	11	881	889	12.7
peptide6270	sp|P63132|PO113_HUMAN	36.364	92	9.6	12	11	7	0	2	12	377	387	11.5
peptide6339	sp|P63132|PO113_HUMAN	18.182	92	3.9	24	22	18	0	1	22	49	70	13.1
peptide6948	sp|P63132|PO113_HUMAN	57.143	92	0.31	12	7	3	0	5	11	29	35	14.6
peptide6948	sp|P63132|PO113_HUMAN	55.556	92	2.5	12	9	4	0	1	9	867	875	12.7
peptide7209	sp|P63132|PO113_HUMAN	36.364	92	9.9	12	11	7	0	2	12	198	208	11.5
peptide7376	sp|P63132|PO113_HUMAN	45.455	92	2.6	12	11	6	0	1	11	482	492	12.7
peptide7806	sp|P63132|PO113_HUMAN	35.714	92	5.1	25	14	9	0	11	24	69	82	12.7
peptide7806	sp|P63132|PO113_HUMAN	27.273	92	6.8	25	11	8	0	2	12	814	824	12.7
peptide7954	sp|P63132|PO113_HUMAN	41.667	92	1.5	13	12	7	0	1	12	467	478	13.1
peptide8072	sp|P63132|PO113_HUMAN	36.364	92	0.091	12	11	7	0	1	11	923	933	15.8
peptide9586	sp|P63132|PO113_HUMAN	44.444	92	1.5	24	9	5	0	14	22	627	635	13.9
peptide9586	sp|P63132|PO113_HUMAN	33.333	92	2.9	24	15	10	0	1	15	769	783	13.5
peptide10237	sp|P63132|PO113_HUMAN	27.273	92	1.4	12	11	8	0	1	11	391	401	13.1
peptide10733	sp|P63132|PO113_HUMAN	50	92	0.052	24	12	6	0	11	22	731	742	17.7
peptide10733	sp|P63132|PO113_HUMAN	33.333	92	7.1	24	12	8	0	1	12	665	676	12.3
peptide10972	sp|P63132|PO113_HUMAN	54.545	92	0.008	12	11	5	0	1	11	830	840	18.9
peptide11603	sp|P63132|PO113_HUMAN	25	92	3.4	26	24	18	0	3	26	729	752	13.5
peptide12027	sp|P63132|PO113_HUMAN	50	92	0.029	13	12	6	0	1	12	518	529	17.3
peptide12126	sp|P63132|PO113_HUMAN	45.455	92	7.3	12	11	6	0	1	11	826	836	11.5
peptide12189	sp|P63132|PO113_HUMAN	36.364	92	9.9	12	11	7	0	2	12	198	208	11.5
peptide13840	sp|P63132|PO113_HUMAN	45.455	92	0.63	12	11	6	0	1	11	566	576	13.9
peptide14590	sp|P63132|PO113_HUMAN	41.667	92	0.72	13	12	7	0	1	12	871	882	13.9
peptide14620	sp|P63132|PO113_HUMAN	44.444	92	0.1	13	9	5	0	4	12	828	836	15.8
peptide14620	sp|P63132|PO113_HUMAN	42.857	92	5.9	13	7	4	0	1	7	271	277	11.9
peptide15324	sp|P63132|PO113_HUMAN	45.455	92	0.18	12	11	6	0	2	12	427	437	15
peptide15392	sp|P63132|PO113_HUMAN	55.556	92	1	13	9	4	0	3	11	144	152	13.5
peptide15392	sp|P63132|PO113_HUMAN	25	92	2.3	13	12	9	0	2	13	450	461	12.7
peptide15618	sp|P63132|PO113_HUMAN	41.667	92	1.9	13	12	7	0	2	13	808	819	13.1
peptide16387	sp|P63132|PO113_HUMAN	33.333	92	0.057	13	12	8	0	2	13	428	439	16.5
peptide17794	sp|P63132|PO113_HUMAN	45.455	92	0.7	12	11	6	0	1	11	24	34	13.9
peptide20371	sp|P63132|PO113_HUMAN	41.667	92	4.9	13	12	7	0	2	13	761	772	12.3
peptide747	sp|Q902F9|EN113_HUMAN	36.364	92	8.2	12	11	7	0	1	11	684	694	11.5
peptide899	sp|Q902F9|EN113_HUMAN	41.667	92	1	13	12	7	0	2	13	135	146	13.5
peptide1106	sp|Q902F9|EN113_HUMAN	33.333	92	0.27	13	12	8	0	2	13	565	576	15
peptide1380	sp|Q902F9|EN113_HUMAN	41.667	92	0.7	13	12	7	0	2	13	430	441	13.9
peptide1454	sp|Q902F9|EN113_HUMAN	41.667	92	1.3	13	12	7	0	2	13	658	669	13.5
peptide7650	sp|Q902F9|EN113_HUMAN	33.333	92	0.27	13	12	8	0	2	13	565	576	15
peptide9110	sp|Q902F9|EN113_HUMAN	45.455	92	0.26	12	11	6	0	2	12	44	54	14.6
peptide9833	sp|Q902F9|EN113_HUMAN	45.455	92	1	12	11	6	0	2	12	181	191	13.5
peptide11307	sp|Q902F9|EN113_HUMAN	41.667	92	0.7	13	12	7	0	2	13	430	441	13.9
peptide11478	sp|Q902F9|EN113_HUMAN	33.333	92	4	13	12	8	0	1	12	113	124	12.3
peptide11488	sp|Q902F9|EN113_HUMAN	45.455	92	0.3	12	11	6	0	2	12	340	350	14.6
peptide14176	sp|Q902F9|EN113_HUMAN	36.364	92	0.068	12	11	7	0	1	11	530	540	16.2
peptide16528	sp|Q902F9|EN113_HUMAN	33.333	92	0.27	25	27	14	1	1	23	159	185	15.8
peptide16749	sp|Q902F9|EN113_HUMAN	40.909	92	0.11	24	22	10	1	3	24	129	147	16.5
peptide17418	sp|Q902F9|EN113_HUMAN	50	92	0.37	12	8	4	0	4	11	114	121	14.6
peptide17418	sp|Q902F9|EN113_HUMAN	45.455	92	1.2	12	11	6	0	1	11	497	507	13.5
peptide17800	sp|Q902F9|EN113_HUMAN	45.455	92	1.7	12	11	6	0	2	12	658	668	13.1
peptide19007	sp|Q902F9|EN113_HUMAN	41.667	92	8.5	13	12	7	0	2	13	225	236	11.5
peptide20051	sp|Q902F9|EN113_HUMAN	41.667	92	1.6	13	12	7	0	1	12	135	146	13.1
peptide20262	sp|Q902F9|EN113_HUMAN	66.667	92	0.065	13	12	4	0	2	13	373	384	16.2
peptide9110	sp|P61574|RE113_HUMAN	45.455	92	0.1	12	11	6	0	2	12	44	54	15.8
peptide237	sp|P62684|GA113_HUMAN	83.333	91	0.51	11	6	1	0	6	11	254	259	14.2
peptide237	sp|P62684|GA113_HUMAN	50	91	5.4	11	8	4	0	2	9	652	659	11.9
peptide1368	sp|P62684|GA113_HUMAN	40	91	0.71	11	10	6	0	1	10	620	629	13.9
peptide1967	sp|P62684|GA113_HUMAN	40.909	91	3.8	22	22	10	2	1	20	213	233	13.1
peptide4257	sp|P62684|GA113_HUMAN	38.095	91	6.3	23	21	13	0	3	23	142	162	12.3
peptide5048	sp|P62684|GA113_HUMAN	50	91	2.8	11	10	5	0	1	10	214	223	12.7
peptide5048	sp|P62684|GA113_HUMAN	50	91	5.8	11	10	5	0	1	10	206	215	11.9
peptide5750	sp|P62684|GA113_HUMAN	37.5	91	0.76	22	16	10	0	1	16	260	275	14.6
peptide5750	sp|P62684|GA113_HUMAN	71.429	91	0.96	22	7	2	0	14	20	185	191	14.2
peptide5750	sp|P62684|GA113_HUMAN	66.667	91	1.2	22	6	2	0	14	19	237	242	14.2
peptide6762	sp|P62684|GA113_HUMAN	40	91	7.4	11	10	6	0	2	11	567	576	11.5
peptide7665	sp|P62684|GA113_HUMAN	38.095	91	6.3	23	21	13	0	3	23	142	162	12.3
peptide7828	sp|P62684|GA113_HUMAN	66.667	91	3	11	6	2	0	4	9	613	618	12.3
peptide7828	sp|P62684|GA113_HUMAN	50	91	6.7	11	10	5	0	2	11	214	223	11.5
peptide7929	sp|P62684|GA113_HUMAN	50	91	1.2	11	10	5	0	1	10	49	58	13.5
peptide9028	sp|P62684|GA113_HUMAN	60	91	0.31	11	10	4	0	1	10	490	499	14.6
peptide9218	sp|P62684|GA113_HUMAN	80	91	1.3	11	5	1	0	7	11	245	249	13.5
peptide9218	sp|P62684|GA113_HUMAN	66.667	91	8.9	11	6	2	0	2	7	656	661	11.5
peptide9718	sp|P62684|GA113_HUMAN	50	91	0.085	11	10	5	0	1	10	473	482	15.8
peptide10094	sp|P62684|GA113_HUMAN	40.909	91	3.8	22	22	10	2	2	21	213	233	13.1
peptide10490	sp|P62684|GA113_HUMAN	50	91	2.2	22	20	9	1	1	20	613	631	13.5
peptide10490	sp|P62684|GA113_HUMAN	50	91	4.4	22	12	6	0	9	20	319	330	12.7
peptide12709	sp|P62684|GA113_HUMAN	40	91	2.2	11	10	6	0	2	11	411	420	12.7
peptide13327	sp|P62684|GA113_HUMAN	50	91	0.22	11	10	5	0	1	10	153	162	15
peptide14106	sp|P62684|GA113_HUMAN	50	91	0.085	11	10	5	0	1	10	473	482	15.8
peptide14801	sp|P62684|GA113_HUMAN	60	91	0.037	11	10	4	0	1	10	456	465	16.9
peptide16943	sp|P62684|GA113_HUMAN	40	91	7.6	11	10	6	0	1	10	150	159	11.5
peptide17992	sp|P62684|GA113_HUMAN	50	91	8	11	10	5	0	1	10	91	100	11.5
peptide19608	sp|P62684|GA113_HUMAN	60	91	6.7	11	10	4	0	1	10	491	500	11.5
peptide7694	sp|P63121|VP113_HUMAN	40	91	2.6	11	10	6	0	2	11	140	149	12.7
peptide15902	sp|P63121|VP113_HUMAN	50	91	0.2	11	10	5	0	1	10	99	108	15
peptide816	sp|P63132|PO113_HUMAN	83.333	91	0.2	11	6	1	0	5	10	265	270	15
peptide816	sp|P63132|PO113_HUMAN	50	91	2.2	11	8	4	0	1	8	180	187	12.7
peptide1904	sp|P63132|PO113_HUMAN	40	91	3	11	10	6	0	2	11	763	772	12.3
peptide2183	sp|P63132|PO113_HUMAN	40	91	2.5	22	20	11	1	2	21	127	145	13.5
peptide2222	sp|P63132|PO113_HUMAN	50	91	0.37	11	10	5	0	2	11	763	772	14.2
peptide3613	sp|P63132|PO113_HUMAN	60	91	0.27	11	10	4	0	1	10	16	25	14.6
peptide3681	sp|P63132|PO113_HUMAN	50	91	2.4	11	10	5	0	1	10	669	678	12.7
peptide3834	sp|P63132|PO113_HUMAN	50	91	1.6	11	10	5	0	1	10	838	847	13.1
peptide5390	sp|P63132|PO113_HUMAN	50	91	0.71	11	10	5	0	2	11	843	852	13.9
peptide7194	sp|P63132|PO113_HUMAN	40	91	3.3	11	10	6	0	1	10	763	772	12.3
peptide7364	sp|P63132|PO113_HUMAN	46.154	91	0.85	22	13	7	0	8	20	398	410	14.2
peptide7364	sp|P63132|PO113_HUMAN	62.5	91	0.92	22	8	3	0	1	8	138	145	14.2
peptide8189	sp|P63132|PO113_HUMAN	33.333	91	1.9	23	21	14	0	3	23	871	891	13.9
peptide8189	sp|P63132|PO113_HUMAN	66.667	91	2.4	23	6	2	0	18	23	860	865	13.5
peptide8668	sp|P63132|PO113_HUMAN	40	91	3.7	11	10	6	0	1	10	647	656	12.3
peptide10688	sp|P63132|PO113_HUMAN	40	91	2.2	11	10	6	0	1	10	128	137	12.7
peptide10946	sp|P63132|PO113_HUMAN	40	91	0.65	11	10	6	0	1	10	853	862	13.9
peptide12164	sp|P63132|PO113_HUMAN	33.333	91	1.3	23	9	6	0	7	15	168	176	14.2
peptide12164	sp|P63132|PO113_HUMAN	50	91	2	23	8	4	0	1	8	697	704	13.5
peptide12164	sp|P63132|PO113_HUMAN	66.667	91	2.1	23	6	2	0	17	22	423	428	13.5
peptide14285	sp|P63132|PO113_HUMAN	40	91	5.9	11	10	6	0	1	10	938	947	11.9
peptide15252	sp|P63132|PO113_HUMAN	23.333	91	0.49	33	30	23	0	3	32	646	675	15.8
peptide15252	sp|P63132|PO113_HUMAN	45.455	91	1	33	11	6	0	18	28	105	115	15
peptide15611	sp|P63132|PO113_HUMAN	28.571	91	5.7	23	21	15	0	2	22	835	855	12.7
peptide15611	sp|P63132|PO113_HUMAN	42.857	91	9.2	23	7	4	0	3	9	672	678	11.9
peptide15842	sp|P63132|PO113_HUMAN	50	91	1	11	10	5	0	1	10	624	633	13.5
peptide16554	sp|P63132|PO113_HUMAN	55.556	91	0.35	11	9	4	0	2	10	401	409	14.6
peptide16554	sp|P63132|PO113_HUMAN	50	91	1.7	11	10	5	0	1	10	94	103	13.1
peptide17773	sp|P63132|PO113_HUMAN	50	91	0.23	11	10	5	0	2	11	288	297	14.6
peptide19310	sp|P63132|PO113_HUMAN	30	91	1.8	11	10	7	0	2	11	650	659	13.1
peptide19489	sp|P63132|PO113_HUMAN	50	91	0.97	11	10	5	0	2	11	807	816	13.5
peptide20255	sp|P63132|PO113_HUMAN	40	91	0.98	11	10	6	0	2	11	943	952	13.5
peptide393	sp|Q902F9|EN113_HUMAN	50	91	2.8	11	10	5	0	1	10	133	142	12.7
peptide2709	sp|Q902F9|EN113_HUMAN	57.143	91	0.37	11	7	3	0	3	9	330	336	14.2
peptide2709	sp|Q902F9|EN113_HUMAN	40	91	1.6	11	10	6	0	1	10	140	149	13.1
peptide3235	sp|Q902F9|EN113_HUMAN	33.333	91	0.64	23	21	14	0	1	21	208	228	14.6
peptide5442	sp|Q902F9|EN113_HUMAN	40	91	1	11	10	6	0	2	11	135	144	13.5
peptide8039	sp|Q902F9|EN113_HUMAN	50	91	0.74	11	10	5	0	1	10	520	529	13.9
peptide13743	sp|Q902F9|EN113_HUMAN	41.667	91	2.8	23	12	7	0	12	23	135	146	13.5
peptide13743	sp|Q902F9|EN113_HUMAN	25	91	9.2	23	20	15	0	3	22	91	110	11.9
peptide19608	sp|Q902F9|EN113_HUMAN	40	91	2.6	11	10	6	0	2	11	224	233	12.7
peptide19623	sp|Q902F9|EN113_HUMAN	40	91	4.2	11	10	6	0	2	11	521	530	12.3
peptide19970	sp|Q902F9|EN113_HUMAN	50	91	0.035	11	10	5	0	2	11	220	229	16.9
peptide20007	sp|Q902F9|EN113_HUMAN	50	91	4.3	11	10	5	0	1	10	404	413	12.3
peptide58	sp|P62684|GA113_HUMAN	44.444	90	3.1	10	9	5	0	2	10	645	653	12.3
peptide156	sp|P62684|GA113_HUMAN	33.333	90	0.11	21	12	8	0	3	14	591	602	16.5
peptide156	sp|P62684|GA113_HUMAN	26.667	90	0.84	21	15	11	0	2	16	401	415	14.2
peptide156	sp|P62684|GA113_HUMAN	38.462	90	3.1	21	13	8	0	8	20	99	111	13.1
peptide156	sp|P62684|GA113_HUMAN	28.571	90	4.9	21	7	5	0	6	12	422	428	12.7
peptide766	sp|P62684|GA113_HUMAN	25	90	4.6	21	20	14	1	2	20	418	437	12.7
peptide2232	sp|P62684|GA113_HUMAN	33.333	90	2.5	10	9	6	0	2	10	113	121	12.7
peptide2257	sp|P62684|GA113_HUMAN	42.857	90	0.44	40	14	7	1	2	15	579	591	16.2
peptide2257	sp|P62684|GA113_HUMAN	31.818	90	1.6	40	22	15	0	19	40	575	596	15
peptide2406	sp|P62684|GA113_HUMAN	38.889	90	0.94	20	18	11	0	1	18	607	624	14.2
peptide2406	sp|P62684|GA113_HUMAN	55.556	90	4.5	20	9	4	0	7	15	236	244	12.7
peptide2406	sp|P62684|GA113_HUMAN	66.667	90	8.8	20	6	2	0	12	17	234	239	11.9
peptide2464	sp|P62684|GA113_HUMAN	25	90	4.4	31	28	21	0	2	29	579	606	13.1
peptide2464	sp|P62684|GA113_HUMAN	66.667	90	7.2	31	6	2	0	3	8	435	440	12.7
peptide4394	sp|P62684|GA113_HUMAN	26.667	90	3.9	20	15	11	0	6	20	282	296	12.7
peptide4394	sp|P62684|GA113_HUMAN	33.333	90	5.4	20	18	12	0	3	20	621	638	12.3
peptide5106	sp|P62684|GA113_HUMAN	42.857	90	0.44	40	14	7	1	2	15	579	591	16.2
peptide5106	sp|P62684|GA113_HUMAN	31.818	90	2.9	40	22	15	0	19	40	575	596	14.2
peptide7400	sp|P62684|GA113_HUMAN	30	90	1.5	21	20	13	1	2	20	418	437	13.9
peptide7666	sp|P62684|GA113_HUMAN	44.444	90	0.76	10	9	5	0	1	9	620	628	13.9
peptide8457	sp|P62684|GA113_HUMAN	66.667	90	0.37	10	9	3	0	2	10	658	666	14.2
peptide8457	sp|P62684|GA113_HUMAN	50	90	1.5	10	8	4	0	2	9	214	221	13.1
peptide11661	sp|P62684|GA113_HUMAN	41.176	90	0.44	20	17	10	0	4	20	243	259	15
peptide11661	sp|P62684|GA113_HUMAN	43.75	90	1.5	20	16	8	1	3	17	229	244	13.9
peptide11661	sp|P62684|GA113_HUMAN	45.455	90	3.5	20	11	6	0	8	18	222	232	13.1
peptide11733	sp|P62684|GA113_HUMAN	55.556	90	2.4	10	9	4	0	2	10	232	240	12.7
peptide14202	sp|P62684|GA113_HUMAN	55.556	90	0.65	10	9	4	0	1	9	227	235	13.9
peptide14921	sp|P62684|GA113_HUMAN	36.842	90	0.2	21	19	12	0	1	19	176	194	15.8
peptide16306	sp|P62684|GA113_HUMAN	55.556	90	0.028	10	9	4	0	2	10	315	323	16.9
peptide16309	sp|P62684|GA113_HUMAN	55.556	90	0.028	10	9	4	0	2	10	315	323	16.9
peptide17056	sp|P62684|GA113_HUMAN	44.444	90	0.8	10	9	5	0	2	10	593	601	13.5
peptide17110	sp|P62684|GA113_HUMAN	26.667	90	3.9	20	15	11	0	6	20	282	296	12.7
peptide17110	sp|P62684|GA113_HUMAN	33.333	90	5.4	20	18	12	0	3	20	621	638	12.3
peptide18379	sp|P62684|GA113_HUMAN	55.556	90	0.78	10	9	4	0	1	9	537	545	13.5
peptide19039	sp|P62684|GA113_HUMAN	44.444	90	0.039	21	18	10	0	1	18	227	244	17.7
peptide19039	sp|P62684|GA113_HUMAN	31.579	90	9.1	21	19	13	0	1	19	611	629	11.9
peptide985	sp|P63121|VP113_HUMAN	26.316	90	9.6	21	19	14	0	3	21	126	144	11.9
peptide18664	sp|P63121|VP113_HUMAN	55.556	90	0.22	10	9	4	0	2	10	11	19	14.6
peptide1916	sp|P63132|PO113_HUMAN	44.444	90	3.2	10	9	5	0	2	10	742	750	12.3
peptide2197	sp|P63132|PO113_HUMAN	33.333	90	8.8	20	18	12	0	3	20	894	911	11.9
peptide2781	sp|P63132|PO113_HUMAN	36.842	90	0.43	21	19	12	0	2	20	715	733	15
peptide4488	sp|P63132|PO113_HUMAN	30.769	90	0.66	29	26	18	0	1	26	260	285	15
peptide4488	sp|P63132|PO113_HUMAN	66.667	90	1.6	29	6	2	0	11	16	640	645	14.2
peptide6191	sp|P63132|PO113_HUMAN	42.105	90	0.47	21	19	7	1	2	20	729	743	15
peptide6191	sp|P63132|PO113_HUMAN	57.143	90	0.59	21	7	3	0	11	17	167	173	14.6
peptide6191	sp|P63132|PO113_HUMAN	38.462	90	2.8	21	13	8	0	3	15	674	686	13.1
peptide8481	sp|P63132|PO113_HUMAN	27.273	90	0.52	21	22	13	1	2	20	697	718	15
peptide8494	sp|P63132|PO113_HUMAN	66.667	90	0.004	10	9	3	0	1	9	626	634	19.2
peptide8515	sp|P63132|PO113_HUMAN	47.368	90	3.8	21	19	4	1	1	19	98	110	12.7
peptide9131	sp|P63132|PO113_HUMAN	44.444	90	0.52	10	9	5	0	1	9	476	484	13.9
peptide9581	sp|P63132|PO113_HUMAN	66.667	90	5.8	10	6	2	0	5	10	20	25	11.9
peptide9581	sp|P63132|PO113_HUMAN	57.143	90	7.5	10	7	3	0	2	8	567	573	11.5
peptide12314	sp|P63132|PO113_HUMAN	47.619	90	2.8	20	21	8	1	3	20	94	114	13.1
peptide13050	sp|P63132|PO113_HUMAN	42.105	90	0.071	21	19	6	1	2	20	567	580	16.9
peptide13375	sp|P63132|PO113_HUMAN	33.333	90	0.13	20	18	12	0	2	19	401	418	16.2
peptide16243	sp|P63132|PO113_HUMAN	30.435	90	3.9	21	23	12	1	1	19	503	525	12.7
peptide17332	sp|P63132|PO113_HUMAN	55.556	90	0.041	10	9	4	0	1	9	137	145	16.5
peptide20184	sp|P63132|PO113_HUMAN	38.889	90	0.47	20	18	11	0	1	18	199	216	15
peptide1804	sp|Q902F9|EN113_HUMAN	44.444	90	1.1	10	9	5	0	1	9	378	386	13.5
peptide1900	sp|Q902F9|EN113_HUMAN	44.444	90	0.97	10	9	5	0	2	10	208	216	13.5
peptide2013	sp|Q902F9|EN113_HUMAN	38.889	90	0.99	20	18	11	0	2	19	271	288	14.2
peptide2232	sp|Q902F9|EN113_HUMAN	44.444	90	1.3	10	9	5	0	1	9	63	71	13.1
peptide2235	sp|Q902F9|EN113_HUMAN	55.556	90	0.28	10	9	4	0	1	9	63	71	14.6
peptide2376	sp|Q902F9|EN113_HUMAN	44.444	90	2.5	10	9	5	0	1	9	633	641	12.7
peptide5446	sp|Q902F9|EN113_HUMAN	44.444	90	2.4	10	9	5	0	1	9	363	371	12.7
peptide7223	sp|Q902F9|EN113_HUMAN	44.444	90	6.8	10	9	5	0	2	10	46	54	11.5
peptide7473	sp|Q902F9|EN113_HUMAN	44.444	90	1.3	10	9	5	0	1	9	405	413	13.1
peptide8657	sp|Q902F9|EN113_HUMAN	44.444	90	6.5	10	9	5	0	2	10	389	397	11.5
peptide8683	sp|Q902F9|EN113_HUMAN	55.556	90	2.6	10	9	4	0	1	9	454	462	12.7
peptide9198	sp|Q902F9|EN113_HUMAN	26.316	90	0.021	21	19	14	0	1	19	200	218	18.5
peptide14745	sp|Q902F9|EN113_HUMAN	33.333	90	0.24	10	9	6	0	1	9	88	96	14.6
peptide19305	sp|Q902F9|EN113_HUMAN	66.667	90	1.2	20	6	2	0	10	15	187	192	13.9
peptide19305	sp|Q902F9|EN113_HUMAN	27.778	90	3.9	20	18	13	0	1	18	512	529	12.7
peptide2232	sp|P61574|RE113_HUMAN	44.444	90	1.1	10	9	5	0	1	9	63	71	13.5
peptide2235	sp|P61574|RE113_HUMAN	55.556	90	0.66	10	9	4	0	1	9	63	71	13.9
peptide7223	sp|P61574|RE113_HUMAN	44.444	90	8.1	10	9	5	0	2	10	46	54	11.5
peptide1098	sp|P62684|GA113_HUMAN	50	89	2.7	9	8	4	0	1	8	236	243	12.3
peptide5047	sp|P62684|GA113_HUMAN	35.294	89	4.3	19	17	11	0	1	17	608	624	12.7
peptide5047	sp|P62684|GA113_HUMAN	55.556	89	4.3	19	9	4	0	6	14	236	244	12.7
peptide5047	sp|P62684|GA113_HUMAN	66.667	89	8.7	19	6	2	0	11	16	234	239	11.9
peptide5483	sp|P62684|GA113_HUMAN	50	89	4.4	9	8	4	0	2	9	59	66	11.9
peptide5591	sp|P62684|GA113_HUMAN	50	89	0.1	19	18	8	1	1	17	91	108	16.2
peptide6815	sp|P62684|GA113_HUMAN	62.5	89	0.051	9	8	3	0	1	8	218	225	16.2
peptide6815	sp|P62684|GA113_HUMAN	71.429	89	1.4	9	7	2	0	2	8	655	661	13.1
peptide7049	sp|P62684|GA113_HUMAN	50	89	0.43	19	10	5	0	3	12	237	246	15
peptide7049	sp|P62684|GA113_HUMAN	66.667	89	3.5	19	6	2	0	3	8	640	645	12.7
peptide7049	sp|P62684|GA113_HUMAN	38.462	89	3.9	19	13	8	0	1	13	220	232	12.7
peptide7049	sp|P62684|GA113_HUMAN	50	89	3.9	19	8	4	0	10	17	433	440	12.7
peptide7509	sp|P62684|GA113_HUMAN	50	89	1.2	9	8	4	0	1	8	363	370	13.1
peptide7788	sp|P62684|GA113_HUMAN	50	89	2.5	9	8	4	0	2	9	592	599	12.7
peptide8992	sp|P62684|GA113_HUMAN	62.5	89	1.5	9	8	3	0	1	8	111	118	13.1
peptide9536	sp|P62684|GA113_HUMAN	50	89	5.8	9	8	4	0	1	8	177	184	11.5
peptide9951	sp|P62684|GA113_HUMAN	50	89	6	9	8	4	0	1	8	59	66	11.5
peptide10580	sp|P62684|GA113_HUMAN	55.556	89	0.72	19	9	4	0	1	9	130	138	14.2
peptide10580	sp|P62684|GA113_HUMAN	36.364	89	9.6	19	11	7	0	7	17	581	591	11.9
peptide13563	sp|P62684|GA113_HUMAN	29.268	89	2.8	46	41	22	1	1	41	228	261	14.6
peptide13669	sp|P62684|GA113_HUMAN	50	89	2	9	8	4	0	2	9	74	81	12.7
peptide14009	sp|P62684|GA113_HUMAN	35.294	89	1.7	19	17	11	0	1	17	649	665	13.5
peptide14074	sp|P62684|GA113_HUMAN	71.429	89	0.12	9	7	2	0	2	8	626	632	15
peptide14074	sp|P62684|GA113_HUMAN	66.667	89	0.23	9	6	2	0	4	9	47	52	14.6
peptide15597	sp|P62684|GA113_HUMAN	41.176	89	0.095	19	17	10	0	2	18	49	65	16.5
peptide15597	sp|P62684|GA113_HUMAN	55.556	89	0.42	19	9	4	0	7	15	101	109	15
peptide16522	sp|P62684|GA113_HUMAN	33.333	89	3.6	18	15	10	0	1	15	480	494	12.7
peptide16522	sp|P62684|GA113_HUMAN	37.5	89	4.5	18	16	10	0	1	16	209	224	12.7
peptide18750	sp|P62684|GA113_HUMAN	58.333	89	0.15	19	12	5	0	3	14	232	243	15.8
peptide18750	sp|P62684|GA113_HUMAN	57.143	89	0.39	19	14	6	0	4	17	222	235	15
peptide18750	sp|P62684|GA113_HUMAN	45.455	89	2	19	11	6	0	5	15	256	266	13.5
peptide18750	sp|P62684|GA113_HUMAN	46.154	89	7	19	13	7	0	1	13	178	190	12.3
peptide18750	sp|P62684|GA113_HUMAN	46.154	89	7.7	19	13	7	0	5	17	628	640	11.9
peptide6606	sp|P63121|VP113_HUMAN	62.5	89	0.24	9	8	3	0	1	8	101	108	14.6
peptide15074	sp|P63121|VP113_HUMAN	37.5	89	0.74	18	16	10	0	1	16	71	86	14.2
peptide1478	sp|P63132|PO113_HUMAN	62.5	89	2.1	9	8	3	0	2	9	400	407	12.7
peptide2031	sp|P63132|PO113_HUMAN	38.462	89	0.007	19	13	8	0	2	14	128	140	19.6
peptide2031	sp|P63132|PO113_HUMAN	30.769	89	8.1	19	13	9	0	6	18	200	212	11.9
peptide3706	sp|P63132|PO113_HUMAN	26.087	89	1.4	19	23	9	1	3	17	97	119	13.9
peptide3706	sp|P63132|PO113_HUMAN	42.857	89	2.1	19	7	4	0	13	19	157	163	13.5
peptide3706	sp|P63132|PO113_HUMAN	50	89	7.3	19	6	3	0	13	18	360	365	11.9
peptide5730	sp|P63132|PO113_HUMAN	55.556	89	0.22	18	9	4	0	9	17	707	715	15.4
peptide5730	sp|P63132|PO113_HUMAN	25	89	0.27	18	16	12	0	3	18	904	919	15.4
peptide6318	sp|P63132|PO113_HUMAN	62.5	89	0.12	9	8	3	0	1	8	63	70	15.4
peptide6397	sp|P63132|PO113_HUMAN	26.667	89	0.11	19	15	11	0	1	15	941	955	16.2
peptide6397	sp|P63132|PO113_HUMAN	71.429	89	0.26	19	7	2	0	11	17	932	938	15.4
peptide6547	sp|P63132|PO113_HUMAN	50	89	7.4	9	8	4	0	2	9	488	495	11.5
peptide7751	sp|P63132|PO113_HUMAN	50	89	0.28	9	8	4	0	2	9	197	204	14.6
peptide13446	sp|P63132|PO113_HUMAN	62.5	89	0.16	9	8	3	0	2	9	569	576	15
peptide13592	sp|P63132|PO113_HUMAN	44.444	89	0.033	19	18	9	1	1	17	92	109	17.7
peptide13845	sp|P63132|PO113_HUMAN	75	89	0.014	9	8	2	0	1	8	567	574	17.7
peptide14024	sp|P63132|PO113_HUMAN	57.143	89	0.18	9	7	3	0	2	8	949	955	15
peptide14024	sp|P63132|PO113_HUMAN	57.143	89	0.29	9	7	3	0	3	9	946	952	14.6
peptide14310	sp|P63132|PO113_HUMAN	31.25	89	0.61	18	16	10	1	3	18	837	851	14.6
peptide14321	sp|P63132|PO113_HUMAN	31.25	89	0.61	18	16	10	1	3	18	837	851	14.6
peptide14500	sp|P63132|PO113_HUMAN	21.429	89	4.6	47	42	31	1	4	45	678	717	13.9
peptide15638	sp|P63132|PO113_HUMAN	35.294	89	0.48	37	17	11	0	13	29	658	674	15.8
peptide15638	sp|P63132|PO113_HUMAN	35	89	4.6	37	20	12	1	5	24	715	733	13.5
peptide15638	sp|P63132|PO113_HUMAN	27.778	89	8.1	37	18	13	0	20	37	61	78	12.7
peptide16296	sp|P63132|PO113_HUMAN	37.5	89	3.6	9	8	5	0	2	9	420	427	12.3
peptide16359	sp|P63132|PO113_HUMAN	50	89	4.8	9	8	4	0	1	8	357	364	11.9
peptide17383	sp|P63132|PO113_HUMAN	50	89	0.81	9	8	4	0	1	8	853	860	13.5
peptide17628	sp|P63132|PO113_HUMAN	29.412	89	1.2	19	17	12	0	1	17	499	515	13.9
peptide17801	sp|P63132|PO113_HUMAN	37.5	89	9.5	9	8	5	0	2	9	913	920	11.2
peptide18114	sp|P63132|PO113_HUMAN	50	89	1.8	9	8	4	0	1	8	429	436	12.7
peptide18795	sp|P63132|PO113_HUMAN	50	89	0.8	9	8	4	0	1	8	853	860	13.5
peptide18890	sp|P63132|PO113_HUMAN	37.5	89	0.71	9	8	5	0	2	9	711	718	13.9
peptide1015	sp|Q902F9|EN113_HUMAN	50	89	0.12	9	8	4	0	2	9	532	539	15
peptide6805	sp|Q902F9|EN113_HUMAN	31.25	89	0.65	18	16	11	0	2	17	658	673	14.2
peptide7625	sp|Q902F9|EN113_HUMAN	43.75	89	0.036	18	16	9	0	2	17	571	586	17.7
peptide8448	sp|Q902F9|EN113_HUMAN	42.105	89	0.36	28	19	9	1	1	19	370	386	15.8
peptide8448	sp|Q902F9|EN113_HUMAN	66.667	89	3	28	6	2	0	21	26	221	226	13.5
peptide9674	sp|Q902F9|EN113_HUMAN	41.667	89	0.81	19	12	7	0	6	17	502	513	14.2
peptide9674	sp|Q902F9|EN113_HUMAN	23.529	89	2.5	19	17	13	0	3	19	405	421	13.1
peptide9701	sp|Q902F9|EN113_HUMAN	31.25	89	0.44	18	16	11	0	3	18	386	401	14.6
peptide12023	sp|Q902F9|EN113_HUMAN	41.176	89	0.39	19	17	10	0	2	18	589	605	15
peptide12569	sp|Q902F9|EN113_HUMAN	29.268	89	0.55	46	41	24	1	2	42	585	620	16.2
peptide14371	sp|Q902F9|EN113_HUMAN	50	89	2.5	9	8	4	0	2	9	184	191	12.7
peptide14465	sp|Q902F9|EN113_HUMAN	35.294	89	0.67	19	17	11	0	2	18	599	615	14.6
peptide1363	sp|P62684|GA113_HUMAN	50	88	1.3	17	6	3	0	2	7	109	114	13.9
peptide1363	sp|P62684|GA113_HUMAN	44.444	88	3.5	17	9	5	0	8	16	651	659	12.7
peptide3013	sp|P62684|GA113_HUMAN	42.857	88	0.22	16	14	8	0	3	16	237	250	15.4
peptide3013	sp|P62684|GA113_HUMAN	66.667	88	3.5	16	6	2	0	3	8	640	645	12.7
peptide3506	sp|P62684|GA113_HUMAN	62.5	88	0.69	33	8	3	0	23	30	225	232	15.4
peptide3506	sp|P62684|GA113_HUMAN	25	88	3.1	33	16	12	0	2	17	580	595	13.9
peptide3506	sp|P62684|GA113_HUMAN	25	88	3.8	33	20	13	1	5	24	101	118	13.5
peptide6567	sp|P62684|GA113_HUMAN	57.143	88	0.86	8	7	3	0	2	8	578	584	13.5
peptide8491	sp|P62684|GA113_HUMAN	40	88	0.43	17	15	9	0	1	15	172	186	14.6
peptide8715	sp|P62684|GA113_HUMAN	57.143	88	0.85	8	7	3	0	1	7	488	494	13.5
peptide10029	sp|P62684|GA113_HUMAN	40	88	2.6	17	15	9	0	1	15	608	622	13.1
peptide10029	sp|P62684|GA113_HUMAN	50	88	3	17	12	6	0	2	13	290	301	13.1
peptide10029	sp|P62684|GA113_HUMAN	40	88	8.3	17	15	9	0	1	15	603	617	11.9
peptide12038	sp|P62684|GA113_HUMAN	50	88	0.037	16	14	7	0	2	15	455	468	17.3
peptide12121	sp|P62684|GA113_HUMAN	38.095	88	4.7	24	21	9	1	4	24	161	177	12.7
peptide13009	sp|P62684|GA113_HUMAN	42.857	88	1.8	8	7	4	0	2	8	275	281	12.7
peptide13265	sp|P62684|GA113_HUMAN	57.143	88	4.6	8	7	3	0	1	7	166	172	11.9
peptide14034	sp|P62684|GA113_HUMAN	46.667	88	0.08	17	15	8	0	2	16	55	69	16.5
peptide14539	sp|P62684|GA113_HUMAN	25	88	4.7	26	16	12	0	4	19	580	595	13.1
peptide14539	sp|P62684|GA113_HUMAN	37.5	88	6	26	8	5	0	19	26	111	118	12.7
peptide14616	sp|P62684|GA113_HUMAN	57.143	88	3.4	8	7	3	0	1	7	234	240	12.3
peptide16200	sp|P62684|GA113_HUMAN	45.455	88	0.13	17	11	6	0	6	16	145	155	15.8
peptide16200	sp|P62684|GA113_HUMAN	55.556	88	2.7	17	9	4	0	2	10	126	134	13.1
peptide16878	sp|P62684|GA113_HUMAN	57.143	88	1.2	8	7	3	0	1	7	543	549	13.1
peptide16885	sp|P62684|GA113_HUMAN	57.143	88	0.17	8	7	3	0	2	8	325	331	15
peptide18013	sp|P62684|GA113_HUMAN	40	88	4.3	17	15	9	0	1	15	385	399	12.7
peptide19416	sp|P62684|GA113_HUMAN	40	88	4.7	17	15	9	0	3	17	330	344	12.3
peptide15071	sp|P63121|VP113_HUMAN	40	88	1	17	15	9	0	1	15	72	86	13.9
peptide17318	sp|P63121|VP113_HUMAN	57.143	88	0.48	8	7	3	0	2	8	35	41	13.9
peptide19599	sp|P63121|VP113_HUMAN	35.714	88	5.3	16	14	9	0	3	16	125	138	12.3
peptide690	sp|P63132|PO113_HUMAN	50	88	0.02	16	14	7	0	3	16	776	789	18.1
peptide1116	sp|P63132|PO113_HUMAN	42.857	88	0.61	8	7	4	0	1	7	712	718	13.9
peptide1279	sp|P63132|PO113_HUMAN	28.571	88	0.52	24	21	14	1	3	23	837	856	15
peptide1583	sp|P63132|PO113_HUMAN	57.143	88	0.11	8	7	3	0	2	8	813	819	15
peptide1899	sp|P63132|PO113_HUMAN	57.143	88	0.9	8	7	3	0	2	8	144	150	13.5
peptide2045	sp|P63132|PO113_HUMAN	26.667	88	10	17	15	11	0	3	17	805	819	11.5
peptide2054	sp|P63132|PO113_HUMAN	42.857	88	1.6	8	7	4	0	1	7	710	716	12.7
peptide2066	sp|P63132|PO113_HUMAN	42.857	88	2.7	16	14	8	0	3	16	462	475	13.1
peptide2435	sp|P63132|PO113_HUMAN	28.571	88	0.52	24	21	14	1	3	23	837	856	15
peptide2669	sp|P63132|PO113_HUMAN	42.857	88	4.6	16	14	8	0	3	16	462	475	12.3
peptide3447	sp|P63132|PO113_HUMAN	42.857	88	0.9	16	14	8	0	1	14	55	68	13.9
peptide3865	sp|P63132|PO113_HUMAN	21.429	88	4.7	48	42	31	1	5	46	678	717	13.9
peptide4537	sp|P63132|PO113_HUMAN	40	88	0.078	17	15	9	0	2	16	239	253	16.5
peptide4806	sp|P63132|PO113_HUMAN	71.429	88	1.1	8	7	2	0	2	8	364	370	13.1
peptide5389	sp|P63132|PO113_HUMAN	46.667	88	0.11	17	15	8	0	2	16	828	842	16.2
peptide5404	sp|P63132|PO113_HUMAN	71.429	88	0.16	8	7	2	0	1	7	568	574	15
peptide5858	sp|P63132|PO113_HUMAN	40	88	1	17	15	9	0	1	15	776	790	13.9
peptide6707	sp|P63132|PO113_HUMAN	57.143	88	0.26	8	7	3	0	2	8	332	338	14.6
peptide7851	sp|P63132|PO113_HUMAN	42.857	88	1.4	16	14	8	0	2	15	900	913	13.5
peptide8629	sp|P63132|PO113_HUMAN	75	88	0.066	17	8	2	0	10	17	177	184	16.5
peptide8629	sp|P63132|PO113_HUMAN	42.857	88	5.8	17	7	4	0	3	9	64	70	12.3
peptide9001	sp|P63132|PO113_HUMAN	28.571	88	2.5	16	14	10	0	2	15	180	193	13.1
peptide10515	sp|P63132|PO113_HUMAN	33.333	88	2.7	16	12	8	0	2	13	771	782	13.1
peptide10515	sp|P63132|PO113_HUMAN	100	88	7.8	16	3	0	0	13	15	364	366	11.9
peptide10743	sp|P63132|PO113_HUMAN	26.087	88	1.1	26	23	17	0	2	24	13	35	14.2
peptide11745	sp|P63132|PO113_HUMAN	28.571	88	2.8	8	7	5	0	1	7	508	514	12.3
peptide11897	sp|P63132|PO113_HUMAN	57.143	88	0.46	8	7	3	0	1	7	935	941	13.9
peptide13400	sp|P63132|PO113_HUMAN	36.364	88	0.79	25	22	14	0	1	22	520	541	14.6
peptide13924	sp|P63132|PO113_HUMAN	42.857	88	0.5	16	14	8	0	2	15	799	812	14.6
peptide14063	sp|P63132|PO113_HUMAN	34.783	88	0.087	26	23	15	0	3	25	711	733	17.3
peptide14237	sp|P63132|PO113_HUMAN	42.857	88	0.086	17	14	8	0	3	16	222	235	16.2
peptide14237	sp|P63132|PO113_HUMAN	100	88	0.57	17	5	0	0	13	17	310	314	14.6
peptide14437	sp|P63132|PO113_HUMAN	57.143	88	0.45	8	7	3	0	2	8	172	178	13.9
peptide14798	sp|P63132|PO113_HUMAN	21.429	88	6.9	16	14	11	0	2	15	848	861	11.9
peptide15829	sp|P63132|PO113_HUMAN	35.714	88	0.28	16	14	9	0	1	14	352	365	15
peptide16150	sp|P63132|PO113_HUMAN	35.714	88	0.7	16	14	9	0	1	14	454	467	14.2
peptide16763	sp|P63132|PO113_HUMAN	38.095	88	0.26	24	21	13	0	3	23	639	659	15.8
peptide16763	sp|P63132|PO113_HUMAN	23.529	88	8	24	17	13	0	3	19	250	266	12.3
peptide17131	sp|P63132|PO113_HUMAN	55.556	88	0.33	17	9	4	0	9	17	923	931	15
peptide17131	sp|P63132|PO113_HUMAN	30.769	88	4	17	13	9	0	3	15	72	84	12.7
peptide456	sp|Q902F9|EN113_HUMAN	42.857	88	3.4	8	7	4	0	1	7	363	369	12.3
peptide700	sp|Q902F9|EN113_HUMAN	35.714	88	3	16	14	9	0	2	15	253	266	12.7
peptide1563	sp|Q902F9|EN113_HUMAN	57.143	88	0.16	8	7	3	0	2	8	656	662	15
peptide3940	sp|Q902F9|EN113_HUMAN	57.143	88	1.2	8	7	3	0	1	7	140	146	13.1
peptide5124	sp|Q902F9|EN113_HUMAN	71.429	88	0.076	8	7	2	0	1	7	139	145	15.4
peptide7044	sp|Q902F9|EN113_HUMAN	64.286	88	0.043	16	14	5	0	3	16	371	384	16.9
peptide8339	sp|Q902F9|EN113_HUMAN	26.667	88	5.2	17	15	11	0	2	16	325	339	12.3
peptide10706	sp|Q902F9|EN113_HUMAN	42.857	88	1.2	8	7	4	0	1	7	245	251	13.1
peptide15948	sp|Q902F9|EN113_HUMAN	44.444	88	1.6	16	9	5	0	1	9	222	230	13.5
peptide15948	sp|Q902F9|EN113_HUMAN	55.556	88	4.4	16	9	4	0	6	14	161	169	12.3
peptide17761	sp|Q902F9|EN113_HUMAN	57.143	88	3.9	8	7	3	0	1	7	616	622	11.9
peptide19416	sp|Q902F9|EN113_HUMAN	33.333	88	2.1	17	15	10	0	3	17	145	159	13.1
peptide20386	sp|Q902F9|EN113_HUMAN	26.087	88	6.1	26	23	17	0	3	25	317	339	12.7
peptide20386	sp|Q902F9|EN113_HUMAN	57.143	88	6.5	26	7	3	0	19	25	200	206	12.7
peptide20386	sp|Q902F9|EN113_HUMAN	33.333	88	8.7	26	12	8	0	13	24	63	74	12.3
peptide301	sp|P62684|GA113_HUMAN	71.429	87	2.5	30	7	2	0	21	27	184	190	13.9
peptide301	sp|P62684|GA113_HUMAN	62.5	87	7.6	30	8	3	0	1	8	656	663	12.7
peptide301	sp|P62684|GA113_HUMAN	27.778	87	10	30	18	13	0	13	30	149	166	12.3
peptide1971	sp|P62684|GA113_HUMAN	30.769	87	1.4	15	13	9	0	3	15	437	449	13.5
peptide4904	sp|P62684|GA113_HUMAN	63.636	87	0.41	15	11	4	0	3	13	232	242	14.6
peptide4904	sp|P62684|GA113_HUMAN	60	87	1.5	15	10	4	0	4	13	222	231	13.5
peptide4904	sp|P62684|GA113_HUMAN	66.667	87	1.8	15	9	3	0	1	9	237	245	13.1
peptide4904	sp|P62684|GA113_HUMAN	46.154	87	6	15	13	7	0	1	13	178	190	11.9
peptide4904	sp|P62684|GA113_HUMAN	66.667	87	9	15	6	2	0	6	11	658	663	11.5
peptide6909	sp|P62684|GA113_HUMAN	62.5	87	0.69	15	8	3	0	6	13	237	244	14.2
peptide6909	sp|P62684|GA113_HUMAN	45.455	87	1	15	11	6	0	4	14	176	186	13.9
peptide6909	sp|P62684|GA113_HUMAN	41.667	87	2.9	15	12	7	0	2	13	607	618	12.7
peptide7156	sp|P62684|GA113_HUMAN	40.909	87	3.8	23	22	10	2	2	21	213	233	13.1
peptide7829	sp|P62684|GA113_HUMAN	45.455	87	2	15	11	6	0	4	14	613	623	13.1
peptide7829	sp|P62684|GA113_HUMAN	66.667	87	3.9	15	6	2	0	9	14	658	663	12.3
peptide7829	sp|P62684|GA113_HUMAN	50	87	4.7	15	10	5	0	2	11	214	223	12.3
peptide8192	sp|P62684|GA113_HUMAN	30.769	87	4.8	15	13	9	0	2	14	167	179	12.3
peptide9690	sp|P62684|GA113_HUMAN	50	87	0.4	23	14	7	0	10	23	257	270	15.4
peptide9690	sp|P62684|GA113_HUMAN	50	87	1.5	23	6	3	0	3	8	111	116	13.9
peptide12905	sp|P62684|GA113_HUMAN	38.462	87	0.14	15	13	8	0	1	13	285	297	15.4
peptide15945	sp|P62684|GA113_HUMAN	50	87	2.9	23	20	9	1	2	21	613	631	13.5
peptide15945	sp|P62684|GA113_HUMAN	50	87	4.4	23	12	6	0	10	21	319	330	12.7
peptide18765	sp|P62684|GA113_HUMAN	53.846	87	0.04	15	13	6	0	1	13	276	288	16.9
peptide19406	sp|P62684|GA113_HUMAN	30.769	87	2.3	15	13	9	0	2	14	547	559	13.1
peptide19673	sp|P62684|GA113_HUMAN	57.143	87	4.3	15	14	5	1	3	15	236	249	12.3
peptide19673	sp|P62684|GA113_HUMAN	66.667	87	9.2	15	6	2	0	9	14	231	236	11.5
peptide2699	sp|P63121|VP113_HUMAN	38.462	87	4.7	15	13	8	0	1	13	74	86	12.3
peptide1716	sp|P63132|PO113_HUMAN	38.462	87	1.8	15	13	8	0	2	14	157	169	13.1
peptide4332	sp|P63132|PO113_HUMAN	38.462	87	8.5	15	13	8	0	2	14	401	413	11.5
peptide5645	sp|P63132|PO113_HUMAN	35.294	87	0.3	30	17	11	0	5	21	566	582	16.2
peptide5645	sp|P63132|PO113_HUMAN	30	87	1.5	30	10	7	0	21	30	818	827	14.2
peptide8848	sp|P63132|PO113_HUMAN	38.462	87	0.16	15	13	8	0	2	14	239	251	15.4
peptide8888	sp|P63132|PO113_HUMAN	26.316	87	4.2	39	19	14	0	15	33	347	365	13.9
peptide8888	sp|P63132|PO113_HUMAN	33.333	87	9.2	39	12	8	0	28	39	71	82	12.7
peptide8888	sp|P63132|PO113_HUMAN	44.444	87	9.2	39	9	5	0	5	13	881	889	12.7
peptide10349	sp|P63132|PO113_HUMAN	38.462	87	0.02	15	13	8	0	1	13	767	779	18.1
peptide10349	sp|P63132|PO113_HUMAN	50	87	5.3	15	10	5	0	4	13	649	658	12.3
peptide10850	sp|P63132|PO113_HUMAN	42.857	87	0.35	23	7	4	0	8	14	844	850	15.4
peptide10850	sp|P63132|PO113_HUMAN	35	87	8.2	23	20	13	0	1	20	136	155	12.3
peptide11492	sp|P63132|PO113_HUMAN	38.462	87	3	15	13	8	0	1	13	254	266	12.7
peptide15245	sp|P63132|PO113_HUMAN	38.462	87	1.7	15	13	8	0	1	13	817	829	13.5
peptide16000	sp|P63132|PO113_HUMAN	38.462	87	0.6	15	13	8	0	1	13	393	405	14.2
peptide16613	sp|P63132|PO113_HUMAN	46.154	87	0.18	15	13	7	0	1	13	112	124	15.4
peptide16839	sp|P63132|PO113_HUMAN	25.641	87	0.23	31	39	17	1	2	28	33	71	16.5
peptide18954	sp|P63132|PO113_HUMAN	50	87	0.14	15	12	5	1	1	12	430	440	15.4
peptide18954	sp|P63132|PO113_HUMAN	46.154	87	0.69	15	13	7	0	1	13	209	221	14.2
peptide19673	sp|P63132|PO113_HUMAN	46.154	87	1.7	15	13	7	0	1	13	13	25	13.5
peptide3140	sp|Q902F9|EN113_HUMAN	38.889	87	1	23	18	11	0	4	21	496	513	14.2
peptide3140	sp|Q902F9|EN113_HUMAN	23.529	87	3.1	23	17	13	0	7	23	405	421	13.1
peptide10079	sp|Q902F9|EN113_HUMAN	53.846	87	0.29	15	13	6	0	3	15	56	68	15
peptide10704	sp|Q902F9|EN113_HUMAN	30.769	87	9.3	15	13	9	0	1	13	388	400	11.5
peptide12351	sp|Q902F9|EN113_HUMAN	30.769	87	0.36	15	13	9	0	2	14	364	376	14.6
peptide13187	sp|Q902F9|EN113_HUMAN	46.154	87	3.2	15	13	7	0	2	14	138	150	12.7
peptide13911	sp|Q902F9|EN113_HUMAN	34.483	87	2.4	31	29	17	1	5	31	220	248	13.9
peptide13911	sp|Q902F9|EN113_HUMAN	66.667	87	2.5	31	6	2	0	7	12	447	452	13.9
peptide17451	sp|Q902F9|EN113_HUMAN	46.154	87	0.35	15	13	7	0	3	15	131	143	14.6
peptide18160	sp|Q902F9|EN113_HUMAN	28	87	7	30	25	18	0	3	27	611	635	12.7
peptide18160	sp|Q902F9|EN113_HUMAN	60	87	8.1	30	10	4	0	2	11	529	538	12.7
peptide10079	sp|P61574|RE113_HUMAN	53.846	87	0.63	15	13	6	0	3	15	56	68	14.2
peptide646	sp|P62684|GA113_HUMAN	41.667	86	0.085	14	12	7	0	3	14	151	162	16.2
peptide2049	sp|P62684|GA113_HUMAN	66.667	86	0.18	7	6	2	0	1	6	368	373	14.6
peptide2928	sp|P62684|GA113_HUMAN	45	86	0.19	22	20	10	1	1	19	512	531	15.8
peptide4370	sp|P62684|GA113_HUMAN	41.667	86	0.62	14	12	7	0	3	14	437	448	14.2
peptide4448	sp|P62684|GA113_HUMAN	33.333	86	2.2	14	12	8	0	3	14	437	448	13.1
peptide5533	sp|P62684|GA113_HUMAN	27.778	86	1.8	21	18	13	0	1	18	191	208	13.5
peptide5533	sp|P62684|GA113_HUMAN	37.5	86	3	21	16	10	0	3	18	626	641	13.1
peptide5984	sp|P62684|GA113_HUMAN	41.667	86	2.2	14	12	7	0	2	13	289	300	13.1
peptide6424	sp|P62684|GA113_HUMAN	50	86	0.26	14	12	6	0	1	12	613	624	15
peptide7054	sp|P62684|GA113_HUMAN	83.333	86	0.044	7	6	1	0	2	7	579	584	15.8
peptide7167	sp|P62684|GA113_HUMAN	27.778	86	1.8	21	18	13	0	1	18	191	208	13.5
peptide7167	sp|P62684|GA113_HUMAN	37.5	86	3	21	16	10	0	3	18	626	641	13.1
peptide7211	sp|P62684|GA113_HUMAN	44.444	86	0.039	21	18	10	0	3	20	634	651	17.7
peptide7422	sp|P62684|GA113_HUMAN	33.333	86	2.7	14	12	8	0	1	12	381	392	12.7
peptide9414	sp|P62684|GA113_HUMAN	41.667	86	0.085	14	12	7	0	3	14	151	162	16.2
peptide11406	sp|P62684|GA113_HUMAN	31.579	86	0.11	28	19	13	0	7	25	286	304	16.9
peptide11406	sp|P62684|GA113_HUMAN	40	86	4.8	28	5	3	0	2	6	81	85	13.1
peptide11590	sp|P62684|GA113_HUMAN	38.889	86	0.87	21	18	11	0	2	19	607	624	14.2
peptide11590	sp|P62684|GA113_HUMAN	55.556	86	4.2	21	9	4	0	8	16	236	244	12.7
peptide11590	sp|P62684|GA113_HUMAN	66.667	86	8.6	21	6	2	0	13	18	234	239	11.9
peptide12085	sp|P62684|GA113_HUMAN	50	86	0.76	7	6	3	0	2	7	366	371	13.5
peptide12286	sp|P62684|GA113_HUMAN	66.667	86	0.32	14	9	3	0	6	14	658	666	14.6
peptide12286	sp|P62684|GA113_HUMAN	36.364	86	0.56	14	11	7	0	3	13	211	221	14.2
peptide12744	sp|P62684|GA113_HUMAN	44.444	86	0.83	21	18	7	1	2	19	311	325	14.2
peptide13332	sp|P62684|GA113_HUMAN	41.667	86	0.085	14	12	7	0	3	14	151	162	16.2
peptide14016	sp|P62684|GA113_HUMAN	33.333	86	8	28	24	16	0	3	26	106	129	12.3
peptide14800	sp|P62684|GA113_HUMAN	66.667	86	0.69	7	6	2	0	2	7	459	464	13.5
peptide14813	sp|P62684|GA113_HUMAN	45.455	86	1.4	14	11	6	0	2	12	613	623	13.5
peptide14813	sp|P62684|GA113_HUMAN	45.455	86	8.4	14	11	6	0	1	11	607	617	11.5
peptide14825	sp|P62684|GA113_HUMAN	22.222	86	3.8	21	18	14	0	3	20	486	503	13.1
peptide15107	sp|P62684|GA113_HUMAN	41.667	86	7.2	14	12	7	0	1	12	382	393	11.9
peptide15531	sp|P62684|GA113_HUMAN	33.333	86	1.5	14	12	8	0	3	14	437	448	13.5
peptide19693	sp|P62684|GA113_HUMAN	33.333	86	1.1	21	18	12	0	3	20	495	512	14.2
peptide20160	sp|P63121|VP113_HUMAN	100	86	0.016	7	6	0	0	2	7	123	128	17.3
peptide1294	sp|P63132|PO113_HUMAN	41.667	86	4.6	14	12	7	0	3	14	761	772	12.3
peptide6923	sp|P63132|PO113_HUMAN	36.842	86	0.036	22	19	12	0	3	21	511	529	17.7
peptide7180	sp|P63132|PO113_HUMAN	32	86	0.11	29	25	17	0	4	28	453	477	16.9
peptide7312	sp|P63132|PO113_HUMAN	50	86	0.25	14	12	6	0	1	12	539	550	15
peptide8911	sp|P63132|PO113_HUMAN	42.105	86	0.004	22	19	11	0	2	20	632	650	20.8
peptide10008	sp|P63132|PO113_HUMAN	25	86	3	14	12	9	0	2	13	160	171	12.7
peptide10187	sp|P63132|PO113_HUMAN	33.333	86	2.3	14	12	8	0	1	12	118	129	13.1
peptide10365	sp|P63132|PO113_HUMAN	32	86	0.11	29	25	17	0	4	28	453	477	16.9
peptide11585	sp|P63132|PO113_HUMAN	83.333	86	1.4	7	6	1	0	1	6	20	25	12.7
peptide13300	sp|P63132|PO113_HUMAN	41.667	86	6.1	14	12	7	0	3	14	471	482	11.9
peptide13608	sp|P63132|PO113_HUMAN	31.579	86	1.7	22	19	13	0	2	20	649	667	13.9
peptide13709	sp|P63132|PO113_HUMAN	50	86	0.41	7	6	3	0	1	6	814	819	13.9
peptide14988	sp|P63132|PO113_HUMAN	40	86	2.2	14	10	6	0	4	13	18	27	13.1
peptide14988	sp|P63132|PO113_HUMAN	57.143	86	2.7	14	7	3	0	2	8	103	109	12.7
peptide16142	sp|P63132|PO113_HUMAN	41.667	86	0.84	14	12	7	0	1	12	456	467	13.9
peptide16355	sp|P63132|PO113_HUMAN	31.579	86	4.5	22	19	13	0	4	22	72	90	12.7
peptide16662	sp|P63132|PO113_HUMAN	41.667	86	0.48	14	12	7	0	3	14	761	772	14.2
peptide16768	sp|P63132|PO113_HUMAN	41.667	86	5.8	14	12	7	0	2	13	271	282	11.9
peptide17422	sp|P63132|PO113_HUMAN	24	86	1.1	29	25	19	0	1	25	141	165	14.6
peptide17528	sp|P63132|PO113_HUMAN	50	86	0.55	14	12	6	0	1	12	539	550	14.2
peptide18227	sp|P63132|PO113_HUMAN	83.333	86	0.51	35	6	1	0	15	20	783	788	15.8
peptide18227	sp|P63132|PO113_HUMAN	27.273	86	0.65	35	22	16	0	2	23	453	474	15.4
peptide18227	sp|P63132|PO113_HUMAN	50	86	4.1	35	8	4	0	28	35	527	534	13.5
peptide19577	sp|P63132|PO113_HUMAN	50	86	0.031	14	12	6	0	2	13	777	788	17.3
peptide19913	sp|P63132|PO113_HUMAN	66.667	86	0.43	7	6	2	0	1	6	944	949	13.9
peptide20357	sp|P63132|PO113_HUMAN	42.105	86	0.42	22	19	7	1	3	21	729	743	15
peptide20357	sp|P63132|PO113_HUMAN	57.143	86	0.58	22	7	3	0	12	18	167	173	14.6
peptide20357	sp|P63132|PO113_HUMAN	38.462	86	2.8	22	13	8	0	4	16	674	686	13.1
peptide20373	sp|P63132|PO113_HUMAN	26.316	86	8.1	22	19	14	0	3	21	503	521	12.3
peptide1893	sp|Q902F9|EN113_HUMAN	33.333	86	5.5	14	12	8	0	3	14	164	175	11.9
peptide3307	sp|Q902F9|EN113_HUMAN	33.333	86	5.5	14	12	8	0	3	14	164	175	11.9
peptide5449	sp|Q902F9|EN113_HUMAN	50	86	0.053	14	12	6	0	1	12	577	588	16.5
peptide6285	sp|Q902F9|EN113_HUMAN	41.667	86	5.8	14	12	7	0	1	12	279	290	11.9
peptide6931	sp|Q902F9|EN113_HUMAN	33.333	86	2.8	14	12	8	0	1	12	319	330	12.7
peptide7033	sp|Q902F9|EN113_HUMAN	83.333	86	0.15	14	6	1	0	6	11	182	187	15.4
peptide7033	sp|Q902F9|EN113_HUMAN	41.667	86	2.8	14	12	7	0	3	14	345	356	12.7
peptide8481	sp|Q902F9|EN113_HUMAN	46.667	86	0.025	21	15	8	0	4	18	545	559	18.1
peptide8481	sp|Q902F9|EN113_HUMAN	60	86	1.6	21	10	2	1	14	21	135	144	13.9
peptide9602	sp|Q902F9|EN113_HUMAN	50	86	0.13	14	12	6	0	1	12	135	146	15.4
peptide9672	sp|Q902F9|EN113_HUMAN	41.667	86	0.69	14	12	7	0	1	12	502	513	14.2
peptide11397	sp|Q902F9|EN113_HUMAN	25	86	3.3	14	12	9	0	3	14	178	189	12.7
peptide11454	sp|Q902F9|EN113_HUMAN	66.667	86	0.98	7	6	2	0	1	6	171	176	13.1
peptide11792	sp|Q902F9|EN113_HUMAN	31.579	86	0.21	22	19	13	0	4	22	279	297	15.8
peptide12194	sp|Q902F9|EN113_HUMAN	37.5	86	0.039	37	32	16	2	6	37	120	147	18.9
peptide14750	sp|Q902F9|EN113_HUMAN	50	86	0.33	14	6	3	0	8	13	416	421	14.6
peptide14750	sp|Q902F9|EN113_HUMAN	50	86	3.3	14	6	3	0	7	12	624	629	12.7
peptide14750	sp|Q902F9|EN113_HUMAN	27.273	86	5.3	14	11	8	0	2	12	255	265	12.3
peptide15032	sp|Q902F9|EN113_HUMAN	62.5	86	0.66	22	8	3	0	3	10	168	175	14.6
peptide15032	sp|Q902F9|EN113_HUMAN	35.714	86	1.2	22	14	9	0	8	21	135	148	14.2
peptide15032	sp|Q902F9|EN113_HUMAN	40	86	2.1	22	10	6	0	7	16	281	290	13.5
peptide17240	sp|Q902F9|EN113_HUMAN	66.667	86	0.71	7	6	2	0	2	7	224	229	13.5
peptide17532	sp|Q902F9|EN113_HUMAN	66.667	86	0.68	7	6	2	0	1	6	206	211	13.5
peptide18804	sp|Q902F9|EN113_HUMAN	33.333	86	4	14	12	8	0	1	12	113	124	12.3
peptide19299	sp|Q902F9|EN113_HUMAN	50	86	0.22	7	6	3	0	2	7	418	423	14.6
peptide19994	sp|Q902F9|EN113_HUMAN	29.412	86	1.1	21	17	12	0	4	20	613	629	14.2
peptide19994	sp|Q902F9|EN113_HUMAN	50	86	1.3	21	6	3	0	16	21	500	505	13.9
peptide20035	sp|Q902F9|EN113_HUMAN	33.333	86	3.1	14	12	8	0	3	14	412	423	12.7
peptide170	sp|P62684|GA113_HUMAN	35.294	85	8.5	20	17	11	0	2	18	500	516	11.9
peptide306	sp|P62684|GA113_HUMAN	35.294	85	8.5	20	17	11	0	2	18	500	516	11.9
peptide1107	sp|P62684|GA113_HUMAN	35.294	85	0.84	20	17	11	0	4	20	477	493	14.2
peptide1573	sp|P62684|GA113_HUMAN	50	85	0.065	33	12	5	1	18	28	364	375	18.1
peptide1573	sp|P62684|GA113_HUMAN	12.5	85	2.4	33	24	21	0	1	24	329	352	13.9
peptide2493	sp|P62684|GA113_HUMAN	57.143	85	0.072	33	7	3	0	22	28	369	375	17.7
peptide2493	sp|P62684|GA113_HUMAN	12.5	85	2	33	24	21	0	1	24	329	352	14.2
peptide2506	sp|P62684|GA113_HUMAN	35.294	85	0.84	20	17	11	0	4	20	477	493	14.2
peptide5154	sp|P62684|GA113_HUMAN	36.364	85	0.76	13	11	7	0	2	12	225	235	13.9
peptide5481	sp|P62684|GA113_HUMAN	50	85	3.9	20	12	6	0	4	15	290	301	12.7
peptide5481	sp|P62684|GA113_HUMAN	45.455	85	4	20	11	6	0	8	18	613	623	12.7
peptide5481	sp|P62684|GA113_HUMAN	45.455	85	4.9	20	11	6	0	10	20	253	263	12.7
peptide5481	sp|P62684|GA113_HUMAN	66.667	85	7.4	20	6	2	0	13	18	658	663	12.3
peptide7795	sp|P62684|GA113_HUMAN	54.545	85	0.2	13	11	5	0	1	11	615	625	15
peptide9294	sp|P62684|GA113_HUMAN	54.545	85	0.57	13	11	5	0	3	13	23	33	14.2
peptide9534	sp|P62684|GA113_HUMAN	29.412	85	3.8	20	17	12	0	3	19	144	160	12.7
peptide9727	sp|P62684|GA113_HUMAN	35.294	85	0.84	20	17	11	0	4	20	477	493	14.2
peptide10189	sp|P62684|GA113_HUMAN	26.087	85	1.3	27	23	17	0	3	25	515	537	14.2
peptide11909	sp|P62684|GA113_HUMAN	45.455	85	0.19	13	11	6	0	3	13	228	238	15
peptide12340	sp|P62684|GA113_HUMAN	50	85	1.7	33	6	3	0	4	9	109	114	14.2
peptide12340	sp|P62684|GA113_HUMAN	38.462	85	2.6	33	13	8	0	17	29	654	666	13.9
peptide12340	sp|P62684|GA113_HUMAN	30.435	85	4.6	33	23	16	0	2	24	237	259	13.5
peptide12340	sp|P62684|GA113_HUMAN	57.143	85	5.4	33	7	3	0	17	23	230	236	13.1
peptide12833	sp|P62684|GA113_HUMAN	55.556	85	0.22	26	9	4	0	1	9	131	139	16.2
peptide12833	sp|P62684|GA113_HUMAN	33.333	85	3	26	21	14	0	2	22	380	400	13.5
peptide13020	sp|P62684|GA113_HUMAN	45.455	85	1.7	13	11	6	0	1	11	339	349	13.1
peptide13144	sp|P62684|GA113_HUMAN	54.545	85	0.082	13	11	5	0	2	12	458	468	15.8
peptide13325	sp|P62684|GA113_HUMAN	45.455	85	1.2	13	11	6	0	2	12	468	478	13.5
peptide13469	sp|P62684|GA113_HUMAN	45.455	85	1.8	13	11	6	0	1	11	198	208	13.1
peptide14115	sp|P62684|GA113_HUMAN	35.294	85	0.84	20	17	11	0	4	20	477	493	14.2
peptide15103	sp|P62684|GA113_HUMAN	45.455	85	0.91	13	11	6	0	3	13	483	493	13.9
peptide15790	sp|P62684|GA113_HUMAN	45.455	85	0.45	13	11	6	0	3	13	239	249	14.2
peptide18172	sp|P62684|GA113_HUMAN	80	85	0.15	20	5	1	0	11	15	230	234	16.2
peptide18172	sp|P62684|GA113_HUMAN	35.294	85	0.42	20	17	11	0	3	19	443	459	15
peptide18172	sp|P62684|GA113_HUMAN	45.455	85	0.5	20	11	6	0	7	17	239	249	14.6
peptide18277	sp|P62684|GA113_HUMAN	54.545	85	0.001	13	11	5	0	1	11	549	559	21.6
peptide19157	sp|P62684|GA113_HUMAN	54.545	85	0.12	13	11	5	0	3	13	296	306	15.4
peptide6575	sp|P63121|VP113_HUMAN	45.455	85	3.2	13	11	6	0	1	11	95	105	12.7
peptide7880	sp|P63121|VP113_HUMAN	45.455	85	0.16	13	11	6	0	1	11	114	124	15.4
peptide8656	sp|P63121|VP113_HUMAN	29.412	85	1.1	20	17	12	0	1	17	139	155	14.2
peptide10312	sp|P63121|VP113_HUMAN	36.364	85	8.9	13	11	7	0	1	11	95	105	11.5
peptide1445	sp|P63132|PO113_HUMAN	36.364	85	6.4	13	11	7	0	1	11	442	452	11.9
peptide2399	sp|P63132|PO113_HUMAN	36.364	85	0.69	13	11	7	0	2	12	453	463	13.9
peptide3653	sp|P63132|PO113_HUMAN	31.579	85	1.5	20	19	11	1	1	17	714	732	13.9
peptide7035	sp|P63132|PO113_HUMAN	36.364	85	8	26	22	14	0	2	23	585	606	12.3
peptide8581	sp|P63132|PO113_HUMAN	54.545	85	0.16	13	11	5	0	2	12	15	25	15.4
peptide9221	sp|P63132|PO113_HUMAN	45.455	85	0.017	13	11	6	0	2	12	929	939	18.1
peptide11864	sp|P63132|PO113_HUMAN	54.545	85	0.008	13	11	5	0	1	11	95	105	18.9
peptide12639	sp|P63132|PO113_HUMAN	27.273	85	1.6	26	22	16	0	4	25	839	860	13.9
peptide13603	sp|P63132|PO113_HUMAN	31.579	85	1.5	20	19	11	1	1	17	714	732	13.9
peptide13763	sp|P63132|PO113_HUMAN	44.444	85	1.3	20	9	5	0	10	18	627	635	13.9
peptide13763	sp|P63132|PO113_HUMAN	50	85	1.3	20	8	4	0	2	9	281	288	13.9
peptide15229	sp|P63132|PO113_HUMAN	27.273	85	1.6	13	11	8	0	3	13	823	833	13.1
peptide18144	sp|P63132|PO113_HUMAN	45.455	85	2.2	13	11	6	0	2	12	603	613	13.1
peptide18222	sp|P63132|PO113_HUMAN	52.941	85	0.013	20	17	5	1	4	20	943	956	18.9
peptide20308	sp|P63132|PO113_HUMAN	54.545	85	0.008	13	11	5	0	1	11	935	945	18.9
peptide311	sp|Q902F9|EN113_HUMAN	35.294	85	0.58	20	17	11	0	1	17	58	74	14.6
peptide357	sp|Q902F9|EN113_HUMAN	36.364	85	8.7	13	11	7	0	1	11	684	694	11.5
peptide812	sp|Q902F9|EN113_HUMAN	54.545	85	0.1	13	11	5	0	2	12	135	145	15.8
peptide1125	sp|Q902F9|EN113_HUMAN	80	85	0.52	27	5	1	0	2	6	224	228	15.4
peptide1125	sp|Q902F9|EN113_HUMAN	58.333	85	1.1	27	12	4	1	2	12	135	146	14.6
peptide1125	sp|Q902F9|EN113_HUMAN	41.667	85	3	27	12	7	0	16	27	135	146	13.5
peptide1125	sp|Q902F9|EN113_HUMAN	100	85	7.4	27	3	0	0	22	24	109	111	12.7
peptide1406	sp|Q902F9|EN113_HUMAN	36.364	85	4.2	13	11	7	0	2	12	385	395	12.3
peptide3502	sp|Q902F9|EN113_HUMAN	35.294	85	0.71	20	17	11	0	3	19	599	615	14.6
peptide5952	sp|Q902F9|EN113_HUMAN	54.545	85	3.1	13	11	5	0	1	11	383	393	12.7
peptide6376	sp|Q902F9|EN113_HUMAN	45.455	85	1.9	13	11	6	0	3	13	181	191	13.1
peptide7111	sp|Q902F9|EN113_HUMAN	54.545	85	3.1	13	11	5	0	1	11	383	393	12.7
peptide7369	sp|Q902F9|EN113_HUMAN	36.364	85	0.46	13	11	7	0	3	13	351	361	14.2
peptide7533	sp|Q902F9|EN113_HUMAN	36.364	85	4.2	13	11	7	0	2	12	385	395	12.3
peptide13785	sp|Q902F9|EN113_HUMAN	36.364	85	3.5	13	11	7	0	1	11	264	274	12.3
peptide13803	sp|Q902F9|EN113_HUMAN	36.364	85	5.1	13	11	7	0	2	12	264	274	11.9
peptide13952	sp|Q902F9|EN113_HUMAN	45.455	85	0.24	13	11	6	0	1	11	126	136	15
peptide14936	sp|Q902F9|EN113_HUMAN	36.364	85	8.7	13	11	7	0	2	12	684	694	11.5
peptide17633	sp|Q902F9|EN113_HUMAN	36.364	85	2.9	26	22	11	1	1	22	157	175	13.5
peptide18050	sp|Q902F9|EN113_HUMAN	45.455	85	4.8	13	11	6	0	3	13	501	511	12.3
peptide19085	sp|Q902F9|EN113_HUMAN	36.364	85	4.6	13	11	7	0	1	11	245	255	12.3
peptide311	sp|P61574|RE113_HUMAN	35.294	85	1.1	20	17	11	0	1	17	58	74	14.2
peptide13820	sp|P61574|RE113_HUMAN	35.294	85	5	20	17	11	0	1	17	89	105	12.7
peptide4998	sp|P62684|GA113_HUMAN	37.5	84	0.12	19	16	10	0	2	17	446	461	16.2
peptide7415	sp|P62684|GA113_HUMAN	29.167	84	3	25	24	14	1	3	23	414	437	13.5
peptide12952	sp|P62684|GA113_HUMAN	36.364	84	0.33	31	22	14	0	1	22	171	192	16.2
peptide12952	sp|P62684|GA113_HUMAN	46.154	84	2.9	31	13	7	0	14	26	177	189	13.9
peptide14113	sp|P62684|GA113_HUMAN	38.095	84	2.8	25	21	13	0	3	23	142	162	13.5
peptide13212	sp|P63121|VP113_HUMAN	25	84	2.4	19	16	12	0	4	19	102	117	13.1
peptide127	sp|P63132|PO113_HUMAN	28.571	84	0.91	31	21	14	1	3	23	837	856	15
peptide127	sp|P63132|PO113_HUMAN	31.579	84	6.7	31	19	13	0	10	28	894	912	12.7
peptide159	sp|P63132|PO113_HUMAN	28.571	84	0.91	31	21	14	1	3	23	837	856	15
peptide159	sp|P63132|PO113_HUMAN	31.579	84	6.7	31	19	13	0	10	28	894	912	12.7
peptide607	sp|P63132|PO113_HUMAN	30.769	84	0.9	31	26	18	0	3	28	260	285	15
peptide607	sp|P63132|PO113_HUMAN	66.667	84	2.1	31	6	2	0	13	18	640	645	14.2
peptide2981	sp|P63132|PO113_HUMAN	50	84	0.046	19	16	5	1	4	19	943	955	17.3
peptide4484	sp|P63132|PO113_HUMAN	50	84	1.9	37	8	4	0	12	19	949	956	14.6
peptide4484	sp|P63132|PO113_HUMAN	24.242	84	2.3	37	33	23	1	4	34	633	665	14.2
peptide5606	sp|P63132|PO113_HUMAN	38.095	84	2.6	25	21	13	0	1	21	216	236	13.5
peptide9803	sp|P63132|PO113_HUMAN	31.25	84	0.57	19	16	10	1	3	18	837	851	14.6
peptide12025	sp|P63132|PO113_HUMAN	25	84	6.9	19	16	12	0	1	16	6	21	12.3
peptide14311	sp|P63132|PO113_HUMAN	31.25	84	0.57	19	16	10	1	3	18	837	851	14.6
peptide15506	sp|P63132|PO113_HUMAN	31.25	84	0.88	19	16	11	0	1	16	696	711	14.2
peptide15571	sp|P63132|PO113_HUMAN	33.333	84	1.4	25	9	6	0	9	17	168	176	14.2
peptide15571	sp|P63132|PO113_HUMAN	50	84	2.3	25	8	4	0	3	10	697	704	13.5
peptide15571	sp|P63132|PO113_HUMAN	66.667	84	2.3	25	6	2	0	19	24	423	428	13.5
peptide17796	sp|P63132|PO113_HUMAN	42.857	84	0.036	19	14	8	0	6	19	101	114	17.7
peptide17796	sp|P63132|PO113_HUMAN	40	84	8.1	19	10	6	0	4	13	763	772	11.9
peptide17809	sp|P63132|PO113_HUMAN	37.5	84	1.6	19	16	8	1	3	18	763	776	13.5
peptide89	sp|Q902F9|EN113_HUMAN	34.483	84	2.5	32	29	17	1	5	31	220	248	13.9
peptide89	sp|Q902F9|EN113_HUMAN	66.667	84	2.6	32	6	2	0	7	12	447	452	13.9
peptide372	sp|Q902F9|EN113_HUMAN	40	84	0.21	31	15	9	0	17	31	153	167	16.5
peptide372	sp|Q902F9|EN113_HUMAN	71.429	84	0.37	31	7	2	0	2	8	329	335	15.8
peptide372	sp|Q902F9|EN113_HUMAN	40	84	4.2	31	10	6	0	13	22	396	405	13.5
peptide5433	sp|Q902F9|EN113_HUMAN	31.25	84	0.47	19	16	11	0	4	19	386	401	14.6
peptide6350	sp|Q902F9|EN113_HUMAN	45.455	84	1.2	19	11	4	1	1	11	224	232	13.9
peptide6350	sp|Q902F9|EN113_HUMAN	40	84	3.7	19	15	6	1	2	16	380	391	12.7
peptide7830	sp|Q902F9|EN113_HUMAN	47.368	84	1.6	19	19	7	1	2	17	283	301	13.5
peptide9126	sp|Q902F9|EN113_HUMAN	42.857	84	0.38	32	14	8	0	19	32	154	167	15.8
peptide9126	sp|Q902F9|EN113_HUMAN	62.5	84	0.54	32	8	3	0	3	10	329	336	15.4
peptide9126	sp|Q902F9|EN113_HUMAN	40	84	3.9	32	10	6	0	14	23	396	405	13.5
peptide10295	sp|Q902F9|EN113_HUMAN	31.25	84	7.2	19	16	11	0	3	18	127	142	11.9
peptide18394	sp|Q902F9|EN113_HUMAN	31.25	84	0.092	19	16	11	0	3	18	352	367	16.5
peptide1038	sp|P62684|GA113_HUMAN	60	83	0.028	12	10	4	0	1	10	272	281	17.3
peptide1336	sp|P62684|GA113_HUMAN	30	83	6	12	10	7	0	1	10	582	591	11.9
peptide1632	sp|P62684|GA113_HUMAN	54.545	83	1.7	24	11	5	0	4	14	615	625	13.9
peptide1632	sp|P62684|GA113_HUMAN	47.368	83	2.4	24	19	8	1	7	23	224	242	13.5
peptide2422	sp|P62684|GA113_HUMAN	36.842	83	2.1	23	19	12	0	3	21	498	516	13.5
peptide2947	sp|P62684|GA113_HUMAN	30	83	8	12	10	7	0	2	11	650	659	11.5
peptide3695	sp|P62684|GA113_HUMAN	40	83	4.3	12	10	6	0	1	10	554	563	12.3
peptide3881	sp|P62684|GA113_HUMAN	46.667	83	1.2	18	15	6	1	3	17	385	397	13.9
peptide5096	sp|P62684|GA113_HUMAN	38.462	83	2.6	18	13	8	0	5	17	99	111	13.1
peptide5096	sp|P62684|GA113_HUMAN	28.571	83	4.1	18	7	5	0	3	9	422	428	12.7
peptide5763	sp|P62684|GA113_HUMAN	50	83	1.2	12	10	5	0	3	12	610	619	13.5
peptide6639	sp|P62684|GA113_HUMAN	40	83	8.5	12	10	6	0	2	11	541	550	11.5
peptide6924	sp|P62684|GA113_HUMAN	40	83	3.4	24	20	12	0	3	22	635	654	13.1
peptide6976	sp|P62684|GA113_HUMAN	50	83	1.9	12	10	5	0	3	12	641	650	13.1
peptide7633	sp|P62684|GA113_HUMAN	42.857	83	1.2	18	7	4	0	7	13	207	213	13.9
peptide7633	sp|P62684|GA113_HUMAN	20	83	6.9	18	15	12	0	3	17	417	431	11.9
peptide7640	sp|P62684|GA113_HUMAN	33.333	83	7.7	29	24	16	0	4	27	106	129	12.7
peptide7945	sp|P62684|GA113_HUMAN	53.846	83	3	12	13	3	1	3	12	221	233	12.7
peptide8847	sp|P62684|GA113_HUMAN	60	83	0.36	12	10	4	0	3	12	261	270	14.6
peptide9309	sp|P62684|GA113_HUMAN	26.667	83	2.4	18	15	11	0	4	18	108	122	13.1
peptide9354	sp|P62684|GA113_HUMAN	36.842	83	2.1	23	19	12	0	3	21	498	516	13.5
peptide9676	sp|P62684|GA113_HUMAN	33.333	83	7.7	29	24	16	0	4	27	106	129	12.7
peptide9965	sp|P62684|GA113_HUMAN	50	83	6.3	12	10	5	0	2	11	99	108	11.9
peptide11894	sp|P62684|GA113_HUMAN	50	83	2.3	18	6	3	0	3	8	109	114	13.1
peptide11894	sp|P62684|GA113_HUMAN	44.444	83	5.7	18	9	5	0	9	17	651	659	12.3
peptide11950	sp|P62684|GA113_HUMAN	33.333	83	0.13	23	12	8	0	5	16	591	602	16.5
peptide11950	sp|P62684|GA113_HUMAN	26.667	83	0.96	23	15	11	0	4	18	401	415	14.2
peptide11950	sp|P62684|GA113_HUMAN	38.462	83	3.5	23	13	8	0	10	22	99	111	13.1
peptide11950	sp|P62684|GA113_HUMAN	28.571	83	5.5	23	7	5	0	8	14	422	428	12.7
peptide14803	sp|P62684|GA113_HUMAN	26.667	83	4.3	36	30	22	0	5	34	515	544	13.5
peptide15303	sp|P62684|GA113_HUMAN	36.842	83	5.4	23	19	12	0	5	23	148	166	12.7
peptide15943	sp|P62684|GA113_HUMAN	60	83	1.2	12	10	4	0	1	10	222	231	13.5
peptide15943	sp|P62684|GA113_HUMAN	66.667	83	1.4	12	9	3	0	2	10	234	242	13.1
peptide15943	sp|P62684|GA113_HUMAN	66.667	83	7.5	12	6	2	0	3	8	658	663	11.5
peptide16183	sp|P62684|GA113_HUMAN	50	83	0.93	12	10	5	0	2	11	166	175	13.5
peptide17439	sp|P62684|GA113_HUMAN	40	83	2.8	12	10	6	0	1	10	272	281	12.7
peptide18839	sp|P62684|GA113_HUMAN	40	83	0.76	18	15	9	0	1	15	388	402	14.2
peptide18842	sp|P62684|GA113_HUMAN	33.333	83	4.6	18	15	10	0	1	15	388	402	12.7
peptide18944	sp|P62684|GA113_HUMAN	33.333	83	2.3	18	15	10	0	4	18	207	221	13.1
peptide20092	sp|P62684|GA113_HUMAN	46.154	83	0.61	18	13	7	0	5	17	99	111	14.6
peptide20092	sp|P62684|GA113_HUMAN	28.571	83	4.1	18	7	5	0	3	9	422	428	12.7
peptide251	sp|P63121|VP113_HUMAN	40	83	1.7	12	10	6	0	3	12	140	149	13.1
peptide3874	sp|P63121|VP113_HUMAN	50	83	0.79	12	10	5	0	3	12	38	47	13.9
peptide8185	sp|P63121|VP113_HUMAN	50	83	1.3	12	10	5	0	2	11	59	68	13.5
peptide16764	sp|P63121|VP113_HUMAN	40	83	3.2	24	20	10	1	3	22	129	146	13.1
peptide403	sp|P63132|PO113_HUMAN	46.667	83	0.12	18	15	8	0	3	17	828	842	16.2
peptide617	sp|P63132|PO113_HUMAN	33.333	83	2.2	18	15	10	0	1	15	934	948	13.1
peptide1218	sp|P63132|PO113_HUMAN	40	83	1.4	18	15	9	0	3	17	828	842	13.9
peptide1372	sp|P63132|PO113_HUMAN	40	83	9.1	12	10	6	0	1	10	443	452	11.5
peptide1373	sp|P63132|PO113_HUMAN	40	83	0.057	18	15	9	0	2	16	636	650	16.9
peptide1632	sp|P63132|PO113_HUMAN	100	83	2.6	24	4	0	0	2	5	19	22	13.5
peptide1632	sp|P63132|PO113_HUMAN	31.25	83	7.6	24	16	11	0	7	22	704	719	12.3
peptide1724	sp|P63132|PO113_HUMAN	46.667	83	0.48	18	15	8	0	3	17	828	842	14.6
peptide2130	sp|P63132|PO113_HUMAN	40	83	0.05	18	15	9	0	3	17	899	913	16.9
peptide2813	sp|P63132|PO113_HUMAN	40	83	3.1	12	10	6	0	2	11	763	772	12.7
peptide3467	sp|P63132|PO113_HUMAN	36.842	83	0.17	23	19	12	0	2	20	859	877	16.2
peptide3817	sp|P63132|PO113_HUMAN	36.842	83	0.17	23	19	12	0	2	20	859	877	16.2
peptide4482	sp|P63132|PO113_HUMAN	66.667	83	1.1	23	6	2	0	5	10	640	645	14.2
peptide4482	sp|P63132|PO113_HUMAN	31.579	83	2.9	23	19	13	0	2	20	267	285	13.1
peptide4770	sp|P63132|PO113_HUMAN	50	83	1.1	12	10	5	0	1	10	562	571	13.5
peptide5924	sp|P63132|PO113_HUMAN	42.105	83	0.36	23	19	7	1	4	22	729	743	15.4
peptide5924	sp|P63132|PO113_HUMAN	57.143	83	0.55	23	7	3	0	13	19	167	173	15
peptide5924	sp|P63132|PO113_HUMAN	38.462	83	2.6	23	13	8	0	5	17	674	686	13.5
peptide7013	sp|P63132|PO113_HUMAN	42.857	83	2.3	18	7	4	0	11	17	824	830	13.1
peptide7013	sp|P63132|PO113_HUMAN	35.714	83	5.1	18	14	9	0	3	16	167	180	12.3
peptide7399	sp|P63132|PO113_HUMAN	40	83	4.4	12	10	6	0	1	10	722	731	12.3
peptide7519	sp|P63132|PO113_HUMAN	46.667	83	0.015	18	15	8	0	4	18	29	43	18.5
peptide7690	sp|P63132|PO113_HUMAN	42.857	83	0.088	18	14	8	0	4	17	222	235	16.5
peptide7690	sp|P63132|PO113_HUMAN	100	83	0.58	18	5	0	0	14	18	310	314	14.6
peptide8599	sp|P63132|PO113_HUMAN	30	83	1.9	12	10	7	0	2	11	650	659	13.1
peptide9216	sp|P63132|PO113_HUMAN	33.333	83	2.2	18	15	10	0	1	15	250	264	13.1
peptide9551	sp|P63132|PO113_HUMAN	50	83	0.82	12	10	5	0	3	12	843	852	13.9
peptide10927	sp|P63132|PO113_HUMAN	30	83	0.76	12	10	7	0	1	10	818	827	13.9
peptide11983	sp|P63132|PO113_HUMAN	40	83	1.3	12	10	6	0	3	12	943	952	13.5
peptide12474	sp|P63132|PO113_HUMAN	46.667	83	0.48	18	15	8	0	3	17	828	842	14.6
peptide14017	sp|P63132|PO113_HUMAN	30	83	0.86	12	10	7	0	2	11	107	116	13.9
peptide15815	sp|P63132|PO113_HUMAN	40	83	0.13	18	15	9	0	1	15	719	733	15.8
peptide16811	sp|P63132|PO113_HUMAN	33.333	83	6.9	18	15	10	0	4	18	164	178	11.9
peptide17001	sp|P63132|PO113_HUMAN	40	83	0.68	18	15	9	0	4	18	469	483	14.2
peptide17339	sp|P63132|PO113_HUMAN	50	83	2	12	10	5	0	1	10	472	481	13.1
peptide17669	sp|P63132|PO113_HUMAN	53.333	83	0.058	23	15	7	0	9	23	744	758	17.3
peptide17669	sp|P63132|PO113_HUMAN	33.333	83	3.6	23	15	10	0	5	19	197	211	13.1
peptide17918	sp|P63132|PO113_HUMAN	40	83	4.2	12	10	6	0	3	12	763	772	12.3
peptide18095	sp|P63132|PO113_HUMAN	35	83	3.4	24	20	13	0	1	20	856	875	13.1
peptide613	sp|Q902F9|EN113_HUMAN	26.087	83	0.71	24	23	14	1	4	23	541	563	14.6
peptide680	sp|Q902F9|EN113_HUMAN	50	83	8.9	12	10	5	0	3	12	501	510	11.5
peptide2166	sp|Q902F9|EN113_HUMAN	26.087	83	0.71	24	23	14	1	4	23	541	563	14.6
peptide3040	sp|Q902F9|EN113_HUMAN	26.667	83	1.2	18	15	11	0	2	16	124	138	13.9
peptide3605	sp|Q902F9|EN113_HUMAN	50	83	0.89	12	10	5	0	1	10	281	290	13.9
peptide4158	sp|Q902F9|EN113_HUMAN	40	83	0.58	18	15	9	0	4	18	222	236	14.6
peptide4739	sp|Q902F9|EN113_HUMAN	44.444	83	0.16	29	18	10	0	11	28	588	605	16.5
peptide4739	sp|Q902F9|EN113_HUMAN	66.667	83	1.8	29	6	2	0	4	9	244	249	14.2
peptide5156	sp|Q902F9|EN113_HUMAN	60	83	0.018	12	10	4	0	3	12	135	144	17.7
peptide5999	sp|Q902F9|EN113_HUMAN	33.333	83	0.28	18	15	10	0	3	17	156	170	15
peptide6556	sp|Q902F9|EN113_HUMAN	50	83	0.071	18	16	7	1	3	17	379	394	16.5
peptide7578	sp|Q902F9|EN113_HUMAN	40	83	0.44	24	20	12	0	1	20	47	66	15
peptide7578	sp|Q902F9|EN113_HUMAN	66.667	83	3.2	24	6	2	0	3	8	33	38	13.1
peptide10901	sp|Q902F9|EN113_HUMAN	40	83	0.15	18	15	9	0	1	15	310	324	15.8
peptide12667	sp|Q902F9|EN113_HUMAN	30.769	83	3.5	36	13	9	0	1	13	64	76	13.9
peptide12667	sp|Q902F9|EN113_HUMAN	29.63	83	7.4	36	27	19	0	4	30	96	122	13.1
peptide14015	sp|Q902F9|EN113_HUMAN	38.889	83	1	24	18	11	0	5	22	496	513	14.2
peptide14015	sp|Q902F9|EN113_HUMAN	23.529	83	3.2	24	17	13	0	8	24	405	421	13.1
peptide14804	sp|Q902F9|EN113_HUMAN	40	83	0.12	24	20	8	1	1	20	555	570	16.5
peptide17552	sp|Q902F9|EN113_HUMAN	50	83	1.7	12	10	5	0	2	11	281	290	13.1
peptide19701	sp|Q902F9|EN113_HUMAN	31.579	83	0.23	23	19	13	0	4	22	279	297	15.8
peptide7578	sp|P61574|RE113_HUMAN	40	83	0.96	24	20	12	0	1	20	47	66	14.6
peptide7578	sp|P61574|RE113_HUMAN	66.667	83	6	24	6	2	0	3	8	33	38	12.7
peptide866	sp|P62684|GA113_HUMAN	44.444	82	1.9	11	9	5	0	1	9	295	303	13.1
peptide1778	sp|P62684|GA113_HUMAN	50	82	1.1	22	12	6	0	10	21	257	268	14.2
peptide1778	sp|P62684|GA113_HUMAN	50	82	1.3	22	6	3	0	3	8	111	116	13.9
peptide3254	sp|P62684|GA113_HUMAN	38.889	82	1.2	22	18	11	0	3	20	607	624	14.2
peptide3254	sp|P62684|GA113_HUMAN	55.556	82	5	22	9	4	0	9	17	236	244	12.7
peptide3254	sp|P62684|GA113_HUMAN	66.667	82	9.2	22	6	2	0	14	19	234	239	11.9
peptide3347	sp|P62684|GA113_HUMAN	44.444	82	1.2	11	9	5	0	1	9	206	214	13.5
peptide3347	sp|P62684|GA113_HUMAN	44.444	82	4.5	11	9	5	0	1	9	214	222	11.9
peptide3473	sp|P62684|GA113_HUMAN	44.444	82	2.9	11	9	5	0	3	11	645	653	12.7
peptide3474	sp|P62684|GA113_HUMAN	44.444	82	2.5	11	9	5	0	1	9	645	653	12.7
peptide3578	sp|P62684|GA113_HUMAN	35.714	82	4.4	17	14	9	0	2	15	140	153	12.3
peptide3723	sp|P62684|GA113_HUMAN	35.714	82	4.4	17	14	9	0	2	15	140	153	12.3
peptide4647	sp|P62684|GA113_HUMAN	33.333	82	8.1	11	9	6	0	3	11	579	587	11.5
peptide6173	sp|P62684|GA113_HUMAN	44.444	82	7.6	11	9	5	0	2	10	617	625	11.5
peptide6543	sp|P62684|GA113_HUMAN	50	82	0.93	11	8	4	0	2	9	552	559	13.5
peptide6543	sp|P62684|GA113_HUMAN	57.143	82	4.7	11	7	3	0	1	7	387	393	11.9
peptide7295	sp|P62684|GA113_HUMAN	44.444	82	5	11	9	5	0	2	10	651	659	11.9
peptide8177	sp|P62684|GA113_HUMAN	44.444	82	9.3	11	9	5	0	1	9	397	405	11.5
peptide8542	sp|P62684|GA113_HUMAN	44.444	82	3.6	11	9	5	0	2	10	284	292	12.3
peptide8673	sp|P62684|GA113_HUMAN	55.556	82	0.98	11	9	4	0	1	9	385	393	13.5
peptide8673	sp|P62684|GA113_HUMAN	80	82	3.1	11	5	1	0	2	6	658	662	12.3
peptide9750	sp|P62684|GA113_HUMAN	55.556	82	0.43	11	9	4	0	2	10	231	239	14.2
peptide10020	sp|P62684|GA113_HUMAN	66.667	82	0.64	11	9	3	0	3	11	232	240	13.9
peptide10054	sp|P62684|GA113_HUMAN	42.857	82	0.73	17	14	8	0	4	17	331	344	14.2
peptide11899	sp|P62684|GA113_HUMAN	30	82	0.91	17	10	7	0	8	17	262	271	13.9
peptide11899	sp|P62684|GA113_HUMAN	38.462	82	4.4	17	13	8	0	4	16	326	338	12.3
peptide11996	sp|P62684|GA113_HUMAN	42.857	82	0.23	17	14	8	0	3	16	237	250	15.4
peptide11996	sp|P62684|GA113_HUMAN	66.667	82	3.6	17	6	2	0	3	8	640	645	12.7
peptide12191	sp|P62684|GA113_HUMAN	44.444	82	0.042	22	18	10	0	3	20	634	651	17.7
peptide14100	sp|P62684|GA113_HUMAN	55.556	82	3.3	11	9	4	0	3	11	514	522	12.3
peptide14648	sp|P62684|GA113_HUMAN	35.714	82	5.3	17	14	9	0	4	17	577	590	12.3
peptide14827	sp|P62684|GA113_HUMAN	55.556	82	1.7	11	9	4	0	2	10	561	569	13.1
peptide15234	sp|P62684|GA113_HUMAN	26.087	82	1.2	28	23	17	0	4	26	515	537	14.6
peptide18757	sp|P62684|GA113_HUMAN	55.556	82	4.8	11	9	4	0	2	10	290	298	11.9
peptide19029	sp|P62684|GA113_HUMAN	66.667	82	0.59	11	9	3	0	2	10	102	110	13.9
peptide19659	sp|P62684|GA113_HUMAN	55.556	82	0.9	11	9	4	0	3	11	503	511	13.5
peptide20296	sp|P62684|GA113_HUMAN	42.857	82	0.23	17	14	8	0	4	17	237	250	15.4
peptide20296	sp|P62684|GA113_HUMAN	66.667	82	3.6	17	6	2	0	4	9	640	645	12.7
peptide5673	sp|P63121|VP113_HUMAN	35.714	82	0.73	17	14	9	0	1	14	69	82	14.2
peptide10528	sp|P63121|VP113_HUMAN	44.444	82	4.1	11	9	5	0	3	11	109	117	12.3
peptide10895	sp|P63121|VP113_HUMAN	44.444	82	9.1	11	9	5	0	1	9	127	135	11.5
peptide15880	sp|P63121|VP113_HUMAN	44.444	82	5.2	11	9	5	0	3	11	130	138	11.9
peptide386	sp|P63132|PO113_HUMAN	44.444	82	5.3	11	9	5	0	1	9	25	33	11.9
peptide906	sp|P63132|PO113_HUMAN	38.889	82	2.9	22	18	11	0	2	19	32	49	13.1
peptide961	sp|P63132|PO113_HUMAN	28.571	82	2.5	34	28	20	0	4	31	199	226	13.9
peptide1497	sp|P63132|PO113_HUMAN	50	82	0.021	17	14	7	0	3	16	776	789	18.1
peptide2008	sp|P63132|PO113_HUMAN	42.857	82	3.2	17	14	8	0	1	14	462	475	12.7
peptide2335	sp|P63132|PO113_HUMAN	44.444	82	0.41	11	9	5	0	1	9	63	71	14.2
peptide2415	sp|P63132|PO113_HUMAN	55.556	82	0.11	11	9	4	0	3	11	944	952	15.4
peptide3580	sp|P63132|PO113_HUMAN	55.556	82	0.042	11	9	4	0	2	10	137	145	16.5
peptide4242	sp|P63132|PO113_HUMAN	66.667	82	0.86	11	6	2	0	5	10	20	25	13.5
peptide4242	sp|P63132|PO113_HUMAN	57.143	82	9.4	11	7	3	0	2	8	567	573	11.5
peptide4506	sp|P63132|PO113_HUMAN	44.444	82	0.52	11	9	5	0	3	11	322	330	14.2
peptide5673	sp|P63132|PO113_HUMAN	28.571	82	1.8	17	14	10	0	1	14	239	252	13.5
peptide5722	sp|P63132|PO113_HUMAN	66.667	82	0.086	11	9	3	0	1	9	268	276	15.8
peptide5863	sp|P63132|PO113_HUMAN	44.444	82	0.71	11	9	5	0	3	11	14	22	13.9
peptide5939	sp|P63132|PO113_HUMAN	42.857	82	5.6	17	14	8	0	1	14	462	475	12.3
peptide6900	sp|P63132|PO113_HUMAN	66.667	82	0.005	11	9	3	0	1	9	626	634	19.2
peptide7595	sp|P63132|PO113_HUMAN	44.444	82	0.67	11	9	5	0	1	9	627	635	13.9
peptide8278	sp|P63132|PO113_HUMAN	55.556	82	0.042	11	9	4	0	2	10	137	145	16.5
peptide11190	sp|P63132|PO113_HUMAN	44.444	82	7.3	11	9	5	0	3	11	401	409	11.5
peptide11751	sp|P63132|PO113_HUMAN	44.444	82	2.4	11	9	5	0	1	9	504	512	12.7
peptide11840	sp|P63132|PO113_HUMAN	55.556	82	0.058	11	9	4	0	3	11	654	662	16.2
peptide13524	sp|P63132|PO113_HUMAN	35.714	82	0.12	17	14	9	0	4	17	814	827	15.8
peptide14648	sp|P63132|PO113_HUMAN	35.714	82	2.3	17	14	9	0	3	16	69	82	13.1
peptide14785	sp|P63132|PO113_HUMAN	21.429	82	6.6	17	14	11	0	4	17	848	861	11.9
peptide15206	sp|P63132|PO113_HUMAN	44.444	82	1.8	11	9	5	0	2	10	205	213	13.1
peptide15725	sp|P63132|PO113_HUMAN	45.455	82	0.069	17	11	6	0	5	15	357	367	16.5
peptide15725	sp|P63132|PO113_HUMAN	36.364	82	4.1	17	11	7	0	2	12	283	293	12.7
peptide19220	sp|P63132|PO113_HUMAN	33.333	82	3.9	11	9	6	0	1	9	627	635	12.3
peptide20000	sp|P63132|PO113_HUMAN	45.455	82	0.18	17	11	6	0	1	11	941	951	15.4
peptide20000	sp|P63132|PO113_HUMAN	37.5	82	1.5	17	8	5	0	7	14	168	175	13.5
peptide2417	sp|Q902F9|EN113_HUMAN	66.667	82	0.12	11	6	2	0	5	10	241	246	15.4
peptide2417	sp|Q902F9|EN113_HUMAN	44.444	82	2.2	11	9	5	0	2	10	132	140	12.7
peptide3755	sp|Q902F9|EN113_HUMAN	42.857	82	0.16	17	14	8	0	2	15	272	285	15.8
peptide4731	sp|Q902F9|EN113_HUMAN	55.556	82	0.18	11	9	4	0	3	11	492	500	15
peptide5048	sp|Q902F9|EN113_HUMAN	44.444	82	1.4	11	9	5	0	2	10	378	386	13.1
peptide5600	sp|Q902F9|EN113_HUMAN	44.444	82	1.5	17	9	5	0	1	9	222	230	13.5
peptide5600	sp|Q902F9|EN113_HUMAN	55.556	82	4.4	17	9	4	0	6	14	161	169	12.7
peptide7608	sp|Q902F9|EN113_HUMAN	44.444	82	0.24	11	9	5	0	2	10	608	616	14.6
peptide7675	sp|Q902F9|EN113_HUMAN	44.444	82	0.099	11	9	5	0	2	10	532	540	15.4
peptide9735	sp|Q902F9|EN113_HUMAN	44.444	82	2.9	11	9	5	0	1	9	105	113	12.7
peptide9750	sp|Q902F9|EN113_HUMAN	55.556	82	0.032	11	9	4	0	1	9	221	229	16.9
peptide12031	sp|Q902F9|EN113_HUMAN	55.556	82	0.55	11	9	4	0	3	11	293	301	13.9
peptide15206	sp|Q902F9|EN113_HUMAN	44.444	82	7.9	11	9	5	0	1	9	287	295	11.5
peptide15295	sp|Q902F9|EN113_HUMAN	55.556	82	0.81	11	9	4	0	3	11	293	301	13.9
peptide19929	sp|Q902F9|EN113_HUMAN	44.444	82	0.39	11	9	5	0	1	9	246	254	14.2
peptide20368	sp|Q902F9|EN113_HUMAN	36.364	82	0.014	28	22	14	0	5	26	138	159	19.6
peptide20368	sp|Q902F9|EN113_HUMAN	80	82	0.69	28	5	1	0	8	12	382	386	15
peptide20368	sp|Q902F9|EN113_HUMAN	44.444	82	0.73	28	9	5	0	19	27	543	551	15
peptide20382	sp|Q902F9|EN113_HUMAN	42.857	82	0.88	17	14	8	0	4	17	508	521	14.2
peptide15299	sp|P61574|RE113_HUMAN	55.556	82	1.4	11	9	4	0	1	9	95	103	13.1
peptide18737	sp|P61574|RE113_HUMAN	35.714	82	9.6	17	14	9	0	2	15	36	49	11.9
peptide248	sp|P62684|GA113_HUMAN	41.176	81	0.082	21	17	10	0	5	21	441	457	16.9
peptide800	sp|P62684|GA113_HUMAN	46.154	81	2.6	16	13	7	0	3	15	427	439	13.1
peptide800	sp|P62684|GA113_HUMAN	80	81	3.2	16	5	1	0	6	10	628	632	12.7
peptide813	sp|P62684|GA113_HUMAN	46.154	81	2.6	16	13	7	0	3	15	427	439	13.1
peptide813	sp|P62684|GA113_HUMAN	80	81	3.2	16	5	1	0	6	10	628	632	12.7
peptide2529	sp|P62684|GA113_HUMAN	42.857	81	1.8	26	14	8	0	11	24	605	618	13.9
peptide2529	sp|P62684|GA113_HUMAN	62.5	81	6.9	26	8	3	0	9	16	658	665	12.7
peptide2529	sp|P62684|GA113_HUMAN	45.455	81	7.4	26	11	6	0	4	14	613	623	12.3
peptide3527	sp|P62684|GA113_HUMAN	70	81	0.13	16	10	3	0	4	13	488	497	15.8
peptide3527	sp|P62684|GA113_HUMAN	50	81	4.2	16	8	4	0	9	16	604	611	12.3
peptide3976	sp|P62684|GA113_HUMAN	41.176	81	0.082	21	17	10	0	5	21	441	457	16.9
peptide4365	sp|P62684|GA113_HUMAN	36.842	81	0.25	21	19	10	1	1	17	262	280	15.4
peptide5140	sp|P62684|GA113_HUMAN	46.154	81	0.028	16	13	7	0	1	13	533	545	17.7
peptide6943	sp|P62684|GA113_HUMAN	38.462	81	5.4	16	13	8	0	3	15	609	621	12.3
peptide8515	sp|P62684|GA113_HUMAN	47.059	81	0.22	21	17	9	0	1	17	615	631	15.8
peptide8567	sp|P62684|GA113_HUMAN	53.846	81	0.22	16	13	6	0	3	15	98	110	15.4
peptide9339	sp|P62684|GA113_HUMAN	23.81	81	4.9	26	21	16	0	2	22	110	130	13.1
peptide10787	sp|P62684|GA113_HUMAN	30.769	81	4.6	16	13	9	0	3	15	167	179	12.3
peptide11246	sp|P62684|GA113_HUMAN	23.529	81	8	21	17	13	0	2	18	94	110	12.3
peptide18756	sp|P62684|GA113_HUMAN	75	81	0.53	16	8	2	0	7	14	232	239	14.6
peptide18756	sp|P62684|GA113_HUMAN	50	81	1.1	16	12	6	0	3	14	176	187	13.9
peptide18756	sp|P62684|GA113_HUMAN	66.667	81	1.6	16	9	3	0	5	13	237	245	13.5
peptide18756	sp|P62684|GA113_HUMAN	66.667	81	5.4	16	6	2	0	3	8	613	618	12.3
peptide18756	sp|P62684|GA113_HUMAN	66.667	81	6.9	16	6	2	0	10	15	658	663	11.9
peptide19037	sp|P62684|GA113_HUMAN	47.059	81	5.4	21	17	9	0	4	20	394	410	12.7
peptide19040	sp|P62684|GA113_HUMAN	53.846	81	0.22	16	13	6	0	3	15	98	110	15.4
peptide19611	sp|P62684|GA113_HUMAN	57.143	81	4.5	16	7	3	0	8	14	190	196	12.3
peptide19611	sp|P62684|GA113_HUMAN	46.154	81	5.5	16	13	7	0	3	15	202	214	12.3
peptide5520	sp|P63121|VP113_HUMAN	38.462	81	3.7	16	13	8	0	1	13	74	86	12.7
peptide509	sp|P63132|PO113_HUMAN	42.857	81	0.31	16	7	4	0	1	7	844	850	15
peptide509	sp|P63132|PO113_HUMAN	41.667	81	8.9	16	12	7	0	2	13	144	155	11.5
peptide2127	sp|P63132|PO113_HUMAN	27.586	81	2.6	36	29	21	0	2	30	861	889	14.2
peptide2542	sp|P63132|PO113_HUMAN	30.769	81	0.31	16	13	9	0	1	13	709	721	15
peptide4523	sp|P63132|PO113_HUMAN	31.579	81	1.7	21	19	11	1	2	18	714	732	13.9
peptide5840	sp|P63132|PO113_HUMAN	21.429	81	1.5	27	14	11	0	14	27	266	279	14.2
peptide5840	sp|P63132|PO113_HUMAN	37.5	81	4.1	27	8	5	0	4	11	645	652	13.1
peptide5876	sp|P63132|PO113_HUMAN	38.462	81	0.08	16	13	8	0	2	14	616	628	16.2
peptide5936	sp|P63132|PO113_HUMAN	31.579	81	1.7	21	19	11	1	2	18	714	732	13.9
peptide7044	sp|P63132|PO113_HUMAN	71.429	81	0.11	16	7	2	0	2	8	164	170	15.8
peptide7044	sp|P63132|PO113_HUMAN	80	81	0.73	16	5	1	0	7	11	98	102	14.2
peptide7044	sp|P63132|PO113_HUMAN	55.556	81	2	16	9	4	0	6	14	947	955	13.1
peptide7352	sp|P63132|PO113_HUMAN	38.462	81	1.1	16	13	8	0	3	15	828	840	13.9
peptide7563	sp|P63132|PO113_HUMAN	46.154	81	0.57	16	13	7	0	1	13	339	351	14.2
peptide7834	sp|P63132|PO113_HUMAN	36.364	81	1.8	27	22	14	0	4	25	166	187	13.9
peptide8760	sp|P63132|PO113_HUMAN	24	81	0.093	31	25	19	0	3	27	76	100	17.3
peptide9804	sp|P63132|PO113_HUMAN	28.571	81	0.7	26	21	14	1	2	22	837	856	15
peptide10675	sp|P63132|PO113_HUMAN	38.462	81	0.007	21	13	8	0	4	16	128	140	19.6
peptide10675	sp|P63132|PO113_HUMAN	30.769	81	8.7	21	13	9	0	8	20	200	212	11.9
peptide12908	sp|P63132|PO113_HUMAN	53.846	81	0.003	16	13	6	0	2	14	508	520	20.4
peptide14288	sp|P63132|PO113_HUMAN	28.571	81	0.66	26	21	14	1	3	23	837	856	15
peptide14295	sp|P63132|PO113_HUMAN	28.571	81	0.66	26	21	14	1	3	23	837	856	15
peptide14319	sp|P63132|PO113_HUMAN	28.571	81	0.7	26	21	14	1	2	22	837	856	15
peptide14921	sp|P63132|PO113_HUMAN	66.667	81	1.5	21	6	2	0	1	6	858	863	13.9
peptide14921	sp|P63132|PO113_HUMAN	33.333	81	1.7	21	15	10	0	3	17	641	655	13.9
peptide14964	sp|P63132|PO113_HUMAN	46.154	81	3.1	16	13	7	0	1	13	290	302	12.7
peptide17601	sp|P63132|PO113_HUMAN	36.364	81	0.67	26	22	13	1	5	25	85	106	15
peptide17602	sp|P63132|PO113_HUMAN	36.364	81	0.67	26	22	13	1	5	25	85	106	15
peptide17708	sp|P63132|PO113_HUMAN	23.529	81	9	21	17	13	0	3	19	657	673	11.9
peptide17775	sp|P63132|PO113_HUMAN	71.429	81	0.048	16	7	2	0	10	16	940	946	16.9
peptide17775	sp|P63132|PO113_HUMAN	66.667	81	0.94	16	6	2	0	4	9	377	382	13.9
peptide18039	sp|P63132|PO113_HUMAN	30.769	81	2.6	16	13	9	0	2	14	829	841	13.1
peptide18214	sp|P63132|PO113_HUMAN	52.941	81	0.014	21	17	5	1	4	20	943	956	18.9
peptide19977	sp|P63132|PO113_HUMAN	38.462	81	0.08	16	13	8	0	2	14	616	628	16.2
peptide20101	sp|P63132|PO113_HUMAN	38.462	81	3.6	16	13	8	0	1	13	936	948	12.7
peptide5261	sp|Q902F9|EN113_HUMAN	38.462	81	0.78	16	13	8	0	1	13	158	170	14.2
peptide7986	sp|Q902F9|EN113_HUMAN	45.455	81	0.083	21	11	6	0	8	18	563	573	16.9
peptide7986	sp|Q902F9|EN113_HUMAN	83.333	81	0.32	21	6	1	0	1	6	357	362	15.4
peptide8449	sp|Q902F9|EN113_HUMAN	23.529	81	0.82	21	17	13	0	4	20	258	274	14.2
peptide9043	sp|Q902F9|EN113_HUMAN	33.333	81	1.3	26	21	14	0	5	25	168	188	14.2
peptide11431	sp|Q902F9|EN113_HUMAN	46.154	81	0.076	16	13	7	0	4	16	170	182	16.5
peptide11508	sp|Q902F9|EN113_HUMAN	50	81	0.011	21	12	6	0	6	17	93	104	19.2
peptide11508	sp|Q902F9|EN113_HUMAN	37.5	81	2.3	21	16	5	1	1	11	432	447	13.5
peptide11595	sp|Q902F9|EN113_HUMAN	46.154	81	0.58	16	13	7	0	3	15	353	365	14.2
peptide12555	sp|Q902F9|EN113_HUMAN	38.462	81	0.76	16	13	8	0	1	13	62	74	14.2
peptide14446	sp|Q902F9|EN113_HUMAN	23.529	81	5.4	21	17	13	0	3	19	544	560	12.7
peptide17810	sp|Q902F9|EN113_HUMAN	34.783	81	0.14	26	23	13	1	5	25	362	384	16.5
peptide19715	sp|Q902F9|EN113_HUMAN	54.545	81	0.017	26	11	5	0	10	20	101	111	19.2
peptide19715	sp|Q902F9|EN113_HUMAN	23.81	81	3.4	26	21	16	0	1	21	151	171	13.5
peptide12555	sp|P61574|RE113_HUMAN	38.462	81	0.58	16	13	8	0	1	13	62	74	14.2
peptide625	sp|P62684|GA113_HUMAN	71.429	80	0.55	20	7	2	0	1	7	613	619	14.6
peptide625	sp|P62684|GA113_HUMAN	71.429	80	0.61	20	7	2	0	10	16	254	260	14.6
peptide625	sp|P62684|GA113_HUMAN	44.444	80	6.9	20	18	7	1	1	15	232	249	12.3
peptide625	sp|P62684|GA113_HUMAN	50	80	7.9	20	8	4	0	6	13	652	659	11.9
peptide940	sp|P62684|GA113_HUMAN	40	80	2.3	15	10	6	0	4	13	181	190	13.1
peptide940	sp|P62684|GA113_HUMAN	62.5	80	6.6	15	8	3	0	8	15	242	249	11.9
peptide940	sp|P62684|GA113_HUMAN	50	80	9.4	15	8	4	0	6	13	235	242	11.5
peptide1148	sp|P62684|GA113_HUMAN	40	80	2.3	15	10	6	0	4	13	181	190	13.1
peptide1148	sp|P62684|GA113_HUMAN	62.5	80	6.6	15	8	3	0	8	15	242	249	11.9
peptide1148	sp|P62684|GA113_HUMAN	50	80	9.4	15	8	4	0	6	13	235	242	11.5
peptide2162	sp|P62684|GA113_HUMAN	66.667	80	0.69	10	6	2	0	3	8	638	643	13.9
peptide2162	sp|P62684|GA113_HUMAN	50	80	2.4	10	8	4	0	3	10	299	306	12.7
peptide2217	sp|P62684|GA113_HUMAN	50	80	3.6	25	20	9	1	4	23	613	631	13.1
peptide2217	sp|P62684|GA113_HUMAN	50	80	4.6	25	12	6	0	12	23	319	330	13.1
peptide2322	sp|P62684|GA113_HUMAN	37.5	80	3.1	10	8	5	0	3	10	58	65	12.3
peptide2485	sp|P62684|GA113_HUMAN	41.667	80	0.09	15	12	7	0	3	14	151	162	16.2
peptide2805	sp|P62684|GA113_HUMAN	50	80	0.47	10	8	4	0	1	8	182	189	14.2
peptide3225	sp|P62684|GA113_HUMAN	50	80	2.2	10	8	4	0	2	9	632	639	12.7
peptide3517	sp|P62684|GA113_HUMAN	41.667	80	6.6	15	12	7	0	4	15	578	589	11.9
peptide3968	sp|P62684|GA113_HUMAN	50	80	1.5	10	8	4	0	3	10	628	635	13.1
peptide4734	sp|P62684|GA113_HUMAN	41.667	80	0.09	15	12	7	0	3	14	151	162	16.2
peptide5807	sp|P62684|GA113_HUMAN	54.545	80	1.6	25	11	5	0	5	15	615	625	13.9
peptide5807	sp|P62684|GA113_HUMAN	47.368	80	2.2	25	19	8	1	8	24	224	242	13.9
peptide6294	sp|P62684|GA113_HUMAN	71.429	80	0.55	20	7	2	0	1	7	613	619	14.6
peptide6294	sp|P62684|GA113_HUMAN	71.429	80	0.61	20	7	2	0	10	16	254	260	14.6
peptide6294	sp|P62684|GA113_HUMAN	44.444	80	6.9	20	18	7	1	1	15	232	249	12.3
peptide6294	sp|P62684|GA113_HUMAN	50	80	7.9	20	8	4	0	6	13	652	659	11.9
peptide6474	sp|P62684|GA113_HUMAN	41.667	80	6.6	15	12	7	0	4	15	578	589	11.9
peptide6731	sp|P62684|GA113_HUMAN	50	80	0.73	15	12	6	0	4	15	262	273	14.2
peptide7799	sp|P62684|GA113_HUMAN	50	80	5.8	10	8	4	0	2	9	59	66	11.9
peptide8685	sp|P62684|GA113_HUMAN	37.5	80	1.5	10	8	5	0	1	8	45	52	13.1
peptide9285	sp|P62684|GA113_HUMAN	41.667	80	2.2	15	12	7	0	2	13	466	477	13.1
peptide9328	sp|P62684|GA113_HUMAN	50	80	2.9	10	8	4	0	1	8	298	305	12.3
peptide9904	sp|P62684|GA113_HUMAN	50	80	2.2	10	8	4	0	2	9	592	599	12.7
peptide10131	sp|P62684|GA113_HUMAN	41.667	80	7.7	15	12	7	0	1	12	382	393	11.9
peptide10907	sp|P62684|GA113_HUMAN	50	80	0.35	15	12	6	0	1	12	448	459	14.6
peptide11317	sp|P62684|GA113_HUMAN	29.167	80	5	30	24	17	0	2	25	461	484	13.1
peptide12232	sp|P62684|GA113_HUMAN	62.5	80	0.054	10	8	3	0	3	10	550	557	16.2
peptide13324	sp|P62684|GA113_HUMAN	41.667	80	0.09	15	12	7	0	3	14	151	162	16.2
peptide15093	sp|P62684|GA113_HUMAN	41.667	80	0.65	15	12	7	0	4	15	391	402	14.2
peptide17471	sp|P62684|GA113_HUMAN	62.5	80	1.6	10	8	3	0	2	9	111	118	13.1
peptide18713	sp|P62684|GA113_HUMAN	50	80	0.42	10	8	4	0	1	8	599	606	14.2
peptide18760	sp|P62684|GA113_HUMAN	33.333	80	2.4	15	12	8	0	1	12	533	544	13.1
peptide18967	sp|P62684|GA113_HUMAN	66.667	80	0.69	10	6	2	0	3	8	638	643	13.9
peptide18967	sp|P62684|GA113_HUMAN	50	80	2.4	10	8	4	0	3	10	299	306	12.7
peptide20174	sp|P62684|GA113_HUMAN	80	80	2.2	10	5	1	0	4	8	223	227	12.7
peptide20174	sp|P62684|GA113_HUMAN	83.333	80	5.2	10	6	1	0	1	6	357	362	11.9
peptide104	sp|P63121|VP113_HUMAN	62.5	80	0.26	10	8	3	0	2	9	101	108	14.6
peptide585	sp|P63121|VP113_HUMAN	50	80	9	10	8	4	0	2	9	134	141	11.5
peptide1391	sp|P63121|VP113_HUMAN	33.333	80	1.7	15	12	8	0	4	15	136	147	13.5
peptide4195	sp|P63121|VP113_HUMAN	62.5	80	0.4	10	8	3	0	2	9	101	108	14.2
peptide4997	sp|P63121|VP113_HUMAN	41.667	80	5.5	15	12	7	0	1	12	96	107	12.3
peptide6168	sp|P63121|VP113_HUMAN	62.5	80	0.34	10	8	3	0	2	9	101	108	14.2
peptide6461	sp|P63121|VP113_HUMAN	50	80	0.69	10	8	4	0	2	9	32	39	13.9
peptide8361	sp|P63121|VP113_HUMAN	33.333	80	1.4	15	12	8	0	4	15	127	138	13.5
peptide10622	sp|P63121|VP113_HUMAN	50	80	0.12	15	12	6	0	1	12	101	112	15.8
peptide12697	sp|P63121|VP113_HUMAN	50	80	0.035	15	12	6	0	3	14	10	21	17.3
peptide15865	sp|P63121|VP113_HUMAN	62.5	80	0.25	10	8	3	0	2	9	101	108	14.6
peptide16185	sp|P63121|VP113_HUMAN	37.5	80	0.28	20	16	10	0	4	19	70	85	15.4
peptide73	sp|P63132|PO113_HUMAN	80	80	0.54	15	5	1	0	4	8	627	631	14.2
peptide73	sp|P63132|PO113_HUMAN	41.667	80	0.61	15	12	7	0	1	12	917	928	14.2
peptide166	sp|P63132|PO113_HUMAN	27.273	80	5.1	15	11	8	0	2	12	150	160	12.3
peptide166	sp|P63132|PO113_HUMAN	33.333	80	9.9	15	12	8	0	2	13	31	42	11.5
peptide1127	sp|P63132|PO113_HUMAN	62.5	80	0.11	10	8	3	0	2	9	63	70	15.4
peptide1839	sp|P63132|PO113_HUMAN	62.5	80	0.007	10	8	3	0	1	8	185	192	18.9
peptide1839	sp|P63132|PO113_HUMAN	57.143	80	0.23	10	7	3	0	1	7	207	213	14.6
peptide3107	sp|P63132|PO113_HUMAN	37.5	80	1.7	10	8	5	0	2	9	677	684	13.1
peptide3145	sp|P63132|PO113_HUMAN	83.333	80	0.14	15	6	1	0	4	9	469	474	15.4
peptide3145	sp|P63132|PO113_HUMAN	41.667	80	3.2	15	12	7	0	4	15	711	722	12.7
peptide4145	sp|P63132|PO113_HUMAN	25	80	6.4	15	12	9	0	4	15	640	651	11.9
peptide5807	sp|P63132|PO113_HUMAN	100	80	2.9	25	4	0	0	3	6	19	22	13.5
peptide5807	sp|P63132|PO113_HUMAN	31.25	80	8.5	25	16	11	0	8	23	704	719	12.3
peptide7572	sp|P63132|PO113_HUMAN	33.333	80	6.9	15	12	8	0	1	12	533	544	11.9
peptide7760	sp|P63132|PO113_HUMAN	50	80	0.1	15	12	6	0	3	14	98	109	15.8
peptide8097	sp|P63132|PO113_HUMAN	50	80	1.9	10	8	4	0	2	9	569	576	12.7
peptide9081	sp|P63132|PO113_HUMAN	41.667	80	0.32	15	12	7	0	4	15	376	387	15
peptide9610	sp|P63132|PO113_HUMAN	75	80	0.015	10	8	2	0	2	9	567	574	17.7
peptide9645	sp|P63132|PO113_HUMAN	37.5	80	0.091	20	16	10	0	4	19	749	764	16.5
peptide9645	sp|P63132|PO113_HUMAN	71.429	80	0.71	20	7	2	0	7	13	354	360	14.6
peptide11554	sp|P63132|PO113_HUMAN	50	80	0.32	10	8	4	0	2	9	62	69	14.6
peptide11806	sp|P63132|PO113_HUMAN	62.5	80	0.5	10	8	3	0	1	8	27	34	14.2
peptide11942	sp|P63132|PO113_HUMAN	42.857	80	0.19	25	14	8	0	3	16	832	845	16.2
peptide11942	sp|P63132|PO113_HUMAN	30	80	1.2	25	20	14	0	2	21	695	714	14.2
peptide11942	sp|P63132|PO113_HUMAN	33.333	80	3.3	25	15	10	0	6	20	650	664	13.1
peptide12351	sp|P63132|PO113_HUMAN	33.333	80	9.3	15	12	8	0	4	15	195	206	11.5
peptide13309	sp|P63132|PO113_HUMAN	41.667	80	6.5	15	12	7	0	4	15	471	482	11.9
peptide13640	sp|P63132|PO113_HUMAN	50	80	0.58	10	8	4	0	1	8	26	33	13.9
peptide14313	sp|P63132|PO113_HUMAN	31.25	80	0.59	20	16	10	1	3	18	837	851	14.6
peptide14314	sp|P63132|PO113_HUMAN	31.25	80	0.59	20	16	10	1	3	18	837	851	14.6
peptide14460	sp|P63132|PO113_HUMAN	50	80	0.3	10	8	4	0	3	10	197	204	14.6
peptide14540	sp|P63132|PO113_HUMAN	28.571	80	2.6	35	28	20	0	5	32	199	226	13.9
peptide14972	sp|P63132|PO113_HUMAN	80	80	0.6	10	5	1	0	4	8	169	173	13.9
peptide14972	sp|P63132|PO113_HUMAN	57.143	80	0.84	10	7	3	0	1	7	555	561	13.5
peptide15272	sp|P63132|PO113_HUMAN	62.5	80	0.039	10	8	3	0	2	9	888	895	16.5
peptide15711	sp|P63132|PO113_HUMAN	38.095	80	2.1	25	21	12	1	6	25	932	952	13.9
peptide15888	sp|P63132|PO113_HUMAN	37.5	80	6.2	10	8	5	0	3	10	117	124	11.5
peptide15950	sp|P63132|PO113_HUMAN	42.857	80	0.54	20	14	8	0	4	17	633	646	14.6
peptide15950	sp|P63132|PO113_HUMAN	62.5	80	2.7	20	8	3	0	12	19	98	105	13.1
peptide16028	sp|P63132|PO113_HUMAN	37.5	80	4.1	20	16	10	0	3	18	285	300	12.7
peptide16246	sp|P63132|PO113_HUMAN	25	80	6.2	25	20	15	0	2	21	284	303	12.7
peptide16663	sp|P63132|PO113_HUMAN	41.667	80	0.52	15	12	7	0	4	15	761	772	14.2
peptide16664	sp|P63132|PO113_HUMAN	41.667	80	0.52	15	12	7	0	4	15	761	772	14.2
peptide17301	sp|P63132|PO113_HUMAN	40	80	0.72	25	20	11	1	1	20	718	736	14.6
peptide17609	sp|P63132|PO113_HUMAN	35	80	0.14	25	20	13	0	6	25	836	855	16.5
peptide17695	sp|P63132|PO113_HUMAN	41.667	80	0.074	15	12	7	0	1	12	189	200	16.2
peptide18115	sp|P63132|PO113_HUMAN	50	80	1.9	10	8	4	0	2	9	429	436	12.7
peptide18247	sp|P63132|PO113_HUMAN	50	80	4.4	10	8	4	0	1	8	923	930	11.9
peptide18791	sp|P63132|PO113_HUMAN	40	80	1.3	25	20	12	0	6	25	437	456	14.2
peptide19685	sp|P63132|PO113_HUMAN	33.333	80	0.49	15	12	8	0	1	12	829	840	14.6
peptide19854	sp|P63132|PO113_HUMAN	50	80	1.7	10	8	4	0	2	9	527	534	13.1
peptide19923	sp|P63132|PO113_HUMAN	62.5	80	0.079	10	8	3	0	2	9	934	941	15.8
peptide20129	sp|P63132|PO113_HUMAN	50	80	1	25	10	5	0	3	12	832	841	14.6
peptide20129	sp|P63132|PO113_HUMAN	30	80	6.8	25	20	14	0	2	21	695	714	12.7
peptide1954	sp|Q902F9|EN113_HUMAN	41.667	80	0.67	15	12	7	0	2	13	502	513	14.2
peptide2174	sp|Q902F9|EN113_HUMAN	50	80	1.2	10	8	4	0	3	10	298	305	13.5
peptide3107	sp|Q902F9|EN113_HUMAN	50	80	1.6	10	8	4	0	1	8	171	178	13.1
peptide3278	sp|Q902F9|EN113_HUMAN	62.5	80	0.035	10	8	3	0	1	8	269	276	16.5
peptide3907	sp|Q902F9|EN113_HUMAN	25	80	6.3	10	8	6	0	1	8	553	560	11.5
peptide4175	sp|Q902F9|EN113_HUMAN	25	80	3.8	10	8	6	0	1	8	552	559	12.3
peptide4281	sp|Q902F9|EN113_HUMAN	41.667	80	1.4	15	12	7	0	3	14	604	615	13.5
peptide5143	sp|Q902F9|EN113_HUMAN	50	80	0.86	15	12	6	0	1	12	382	393	13.9
peptide5428	sp|Q902F9|EN113_HUMAN	38.889	80	1.1	25	18	11	0	6	23	496	513	14.2
peptide5428	sp|Q902F9|EN113_HUMAN	23.529	80	3.4	25	17	13	0	9	25	405	421	13.1
peptide6681	sp|Q902F9|EN113_HUMAN	80	80	0.11	10	5	1	0	1	5	118	122	15.4
peptide6681	sp|Q902F9|EN113_HUMAN	50	80	1.6	10	8	4	0	1	8	132	139	13.1
peptide7630	sp|Q902F9|EN113_HUMAN	43.75	80	0.048	20	16	9	0	2	17	571	586	17.3
peptide8528	sp|Q902F9|EN113_HUMAN	33.333	80	4.1	15	12	8	0	1	12	113	124	12.3
peptide9576	sp|Q902F9|EN113_HUMAN	62.5	80	0.57	10	8	3	0	3	10	47	54	13.9
peptide9576	sp|Q902F9|EN113_HUMAN	66.667	80	1.7	10	6	2	0	5	10	33	38	13.1
peptide10032	sp|Q902F9|EN113_HUMAN	47.368	80	1.7	20	19	7	1	2	17	283	301	13.5
peptide11906	sp|Q902F9|EN113_HUMAN	33.333	80	3.5	15	12	8	0	4	15	412	423	12.7
peptide12339	sp|Q902F9|EN113_HUMAN	26.087	80	0.64	25	23	14	1	4	23	541	563	15
peptide12872	sp|Q902F9|EN113_HUMAN	50	80	0.75	10	8	4	0	3	10	416	423	13.9
peptide13287	sp|Q902F9|EN113_HUMAN	50	80	2.8	10	8	4	0	3	10	492	499	12.3
peptide13549	sp|Q902F9|EN113_HUMAN	62.5	80	0.77	10	8	3	0	1	8	217	224	13.9
peptide13652	sp|Q902F9|EN113_HUMAN	41.667	80	0.35	15	12	7	0	1	12	625	636	14.6
peptide14051	sp|Q902F9|EN113_HUMAN	37.5	80	0.19	10	8	5	0	3	10	569	576	15
peptide14294	sp|Q902F9|EN113_HUMAN	33.333	80	5.4	15	12	8	0	3	14	164	175	12.3
peptide14301	sp|Q902F9|EN113_HUMAN	33.333	80	5.4	15	12	8	0	3	14	164	175	12.3
peptide14370	sp|Q902F9|EN113_HUMAN	50	80	2.9	10	8	4	0	3	10	184	191	12.3
peptide16613	sp|Q902F9|EN113_HUMAN	41.667	80	0.35	15	12	7	0	4	15	257	268	14.6
peptide17177	sp|Q902F9|EN113_HUMAN	50	80	0.33	10	8	4	0	1	8	610	617	14.2
peptide17606	sp|Q902F9|EN113_HUMAN	50	80	0.31	10	8	4	0	3	10	311	318	14.6
peptide18193	sp|Q902F9|EN113_HUMAN	58.333	80	0.061	15	12	5	0	3	14	142	153	16.5
peptide18644	sp|Q902F9|EN113_HUMAN	25	80	1.9	25	20	15	0	5	24	241	260	13.9
peptide9576	sp|P61574|RE113_HUMAN	62.5	80	2.4	10	8	3	0	3	10	47	54	12.7
peptide9576	sp|P61574|RE113_HUMAN	66.667	80	5.9	10	6	2	0	5	10	33	38	11.9
peptide454	sp|P62684|GA113_HUMAN	50	79	2.4	19	6	3	0	4	9	109	114	13.1
peptide454	sp|P62684|GA113_HUMAN	44.444	79	5.9	19	9	5	0	10	18	651	659	12.3
peptide1188	sp|P62684|GA113_HUMAN	55.556	79	4.2	14	9	4	0	1	9	236	244	12.3
peptide1188	sp|P62684|GA113_HUMAN	66.667	79	7.8	14	6	2	0	6	11	234	239	11.9
peptide1938	sp|P62684|GA113_HUMAN	54.545	79	0.59	14	11	5	0	4	14	23	33	14.2
peptide2031	sp|P62684|GA113_HUMAN	40	79	0.16	19	15	8	1	5	19	583	596	15.8
peptide2031	sp|P62684|GA113_HUMAN	50	79	1.3	19	6	3	0	12	17	367	372	13.9
peptide2728	sp|P62684|GA113_HUMAN	45.455	79	3.6	14	11	6	0	4	14	262	272	12.3
peptide6986	sp|P62684|GA113_HUMAN	45.455	79	2.4	14	11	6	0	2	12	644	654	12.7
peptide8475	sp|P62684|GA113_HUMAN	40.909	79	0.58	28	22	12	1	1	22	162	182	15
peptide8577	sp|P62684|GA113_HUMAN	45.455	79	0.91	14	11	6	0	4	14	86	96	13.9
peptide9420	sp|P62684|GA113_HUMAN	45.455	79	1.2	14	11	6	0	3	13	468	478	13.5
peptide11797	sp|P62684|GA113_HUMAN	40	79	1.7	19	15	9	0	1	15	635	649	13.5
peptide11932	sp|P62684|GA113_HUMAN	33.333	79	0.14	24	12	8	0	6	17	591	602	16.5
peptide11932	sp|P62684|GA113_HUMAN	26.667	79	1	24	15	11	0	5	19	401	415	14.2
peptide11932	sp|P62684|GA113_HUMAN	38.462	79	3.7	24	13	8	0	11	23	99	111	13.1
peptide11932	sp|P62684|GA113_HUMAN	28.571	79	5.7	24	7	5	0	9	15	422	428	12.7
peptide14615	sp|P62684|GA113_HUMAN	71.429	79	0.42	14	7	2	0	8	14	234	240	14.6
peptide14615	sp|P62684|GA113_HUMAN	50	79	2.5	14	10	5	0	4	13	653	662	12.7
peptide14615	sp|P62684|GA113_HUMAN	66.667	79	5.8	14	6	2	0	5	10	296	301	11.9
peptide16518	sp|P62684|GA113_HUMAN	54.545	79	1.6	14	11	5	0	3	13	207	217	13.5
peptide18729	sp|P62684|GA113_HUMAN	26.316	79	3.3	28	19	14	0	2	20	498	516	13.5
peptide18729	sp|P62684|GA113_HUMAN	35.714	79	8.6	28	14	9	0	10	23	315	328	12.3
peptide19376	sp|P62684|GA113_HUMAN	40	79	2	19	15	9	0	1	15	249	263	13.5
peptide19414	sp|P62684|GA113_HUMAN	40	79	6.1	19	15	9	0	2	16	330	344	12.3
peptide20100	sp|P62684|GA113_HUMAN	33.333	79	0.096	19	12	8	0	3	14	591	602	16.5
peptide20100	sp|P62684|GA113_HUMAN	26.667	79	0.73	19	15	11	0	2	16	401	415	14.2
peptide20100	sp|P62684|GA113_HUMAN	28.571	79	4.4	19	7	5	0	6	12	422	428	12.7
peptide20100	sp|P62684|GA113_HUMAN	44.444	79	5.9	19	9	5	0	8	16	99	107	12.3
peptide20111	sp|P62684|GA113_HUMAN	33.333	79	0.17	19	12	8	0	3	14	591	602	15.8
peptide20111	sp|P62684|GA113_HUMAN	26.667	79	2.6	19	15	11	0	2	16	401	415	13.1
peptide20127	sp|P62684|GA113_HUMAN	33.333	79	0.14	24	12	8	0	6	17	591	602	16.5
peptide20127	sp|P62684|GA113_HUMAN	26.667	79	1	24	15	11	0	5	19	401	415	14.2
peptide20127	sp|P62684|GA113_HUMAN	38.462	79	3.7	24	13	8	0	11	23	99	111	13.1
peptide20127	sp|P62684|GA113_HUMAN	28.571	79	5.7	24	7	5	0	9	15	422	428	12.7
peptide7660	sp|P63121|VP113_HUMAN	36.364	79	5.2	14	11	7	0	3	13	54	64	12.3
peptide15785	sp|P63121|VP113_HUMAN	45.455	79	0.94	14	11	6	0	2	12	81	91	13.9
peptide741	sp|P63132|PO113_HUMAN	40	79	0.054	19	15	9	0	3	17	899	913	16.9
peptide863	sp|P63132|PO113_HUMAN	42.857	79	0.097	19	14	8	0	5	18	222	235	16.5
peptide863	sp|P63132|PO113_HUMAN	100	79	0.64	19	5	0	0	15	19	310	314	14.6
peptide1501	sp|P63132|PO113_HUMAN	33.333	79	0.79	19	15	10	0	1	15	898	912	14.2
peptide2439	sp|P63132|PO113_HUMAN	27.273	79	4.6	14	11	8	0	1	11	150	160	12.3
peptide2546	sp|P63132|PO113_HUMAN	26.667	79	6.9	19	15	11	0	1	15	941	955	12.3
peptide3066	sp|P63132|PO113_HUMAN	62.5	79	0.94	24	8	3	0	3	10	370	377	14.6
peptide3066	sp|P63132|PO113_HUMAN	30.769	79	1	24	13	9	0	9	21	709	721	14.2
peptide3218	sp|P63132|PO113_HUMAN	66.667	79	0.74	19	6	2	0	10	15	642	647	14.2
peptide3218	sp|P63132|PO113_HUMAN	33.333	79	0.95	19	9	6	0	1	9	830	838	14.2
peptide3231	sp|P63132|PO113_HUMAN	45.455	79	7	14	11	6	0	3	13	273	283	11.9
peptide4057	sp|P63132|PO113_HUMAN	31.579	79	5.6	24	19	13	0	3	21	894	912	12.7
peptide5574	sp|P63132|PO113_HUMAN	40	79	0.2	19	15	9	0	4	18	453	467	15.4
peptide5843	sp|P63132|PO113_HUMAN	57.143	79	0.34	14	7	3	0	7	13	29	35	14.6
peptide5843	sp|P63132|PO113_HUMAN	55.556	79	3.7	14	9	4	0	3	11	867	875	12.3
peptide6924	sp|P63132|PO113_HUMAN	36.842	79	0.039	24	19	12	0	5	23	511	529	18.1
peptide7343	sp|P63132|PO113_HUMAN	33.333	79	0.4	43	24	16	0	7	30	393	416	16.5
peptide7343	sp|P63132|PO113_HUMAN	50	79	7.8	43	10	5	0	32	41	871	880	13.1
peptide7705	sp|P63132|PO113_HUMAN	31.579	79	5.6	24	19	13	0	3	21	894	912	12.7
peptide7985	sp|P63132|PO113_HUMAN	40	79	0.2	19	15	9	0	4	18	453	467	15.4
peptide8712	sp|P63132|PO113_HUMAN	66.667	79	1.1	24	6	2	0	6	11	640	645	14.2
peptide8712	sp|P63132|PO113_HUMAN	31.579	79	3	24	19	13	0	3	21	267	285	13.5
peptide10090	sp|P63132|PO113_HUMAN	36.364	79	1.8	14	11	7	0	2	12	612	622	13.1
peptide10634	sp|P63132|PO113_HUMAN	36.364	79	1.2	14	11	7	0	2	12	504	514	13.5
peptide11545	sp|P63132|PO113_HUMAN	36.842	79	0.046	24	19	12	0	3	21	511	529	17.7
peptide13313	sp|P63132|PO113_HUMAN	40	79	0.054	19	15	9	0	4	18	899	913	16.9
peptide13684	sp|P63132|PO113_HUMAN	45.455	79	0.3	14	11	6	0	4	14	842	852	14.6
peptide13759	sp|P63132|PO113_HUMAN	44.444	79	3	14	9	5	0	4	12	565	573	12.7
peptide13759	sp|P63132|PO113_HUMAN	66.667	79	4.7	14	6	2	0	9	14	20	25	12.3
peptide13914	sp|P63132|PO113_HUMAN	40	79	0.15	19	15	9	0	2	16	800	814	15.8
peptide14672	sp|P63132|PO113_HUMAN	36.364	79	1.1	14	11	7	0	3	13	666	676	13.5
peptide16313	sp|P63132|PO113_HUMAN	54.545	79	0.38	14	11	5	0	2	12	16	26	14.6
peptide18409	sp|P63132|PO113_HUMAN	34.783	79	0.35	29	23	15	0	3	25	853	875	15.8
peptide18717	sp|P63132|PO113_HUMAN	45.455	79	0.1	14	11	6	0	2	12	798	808	15.8
peptide19950	sp|P63132|PO113_HUMAN	54.545	79	0.013	14	11	5	0	1	11	95	105	18.5
peptide205	sp|Q902F9|EN113_HUMAN	45.455	79	2.4	14	11	6	0	4	14	181	191	13.1
peptide238	sp|Q902F9|EN113_HUMAN	36.364	79	5.3	14	11	7	0	2	12	264	274	12.3
peptide1114	sp|Q902F9|EN113_HUMAN	45.455	79	1.4	14	11	6	0	1	11	280	290	13.5
peptide1689	sp|Q902F9|EN113_HUMAN	33.333	79	3.3	24	15	10	0	7	21	135	149	13.1
peptide1689	sp|Q902F9|EN113_HUMAN	50	79	5.6	24	8	4	0	3	10	171	178	12.7
peptide1734	sp|Q902F9|EN113_HUMAN	80	79	1.2	19	5	1	0	10	14	413	417	13.9
peptide1734	sp|Q902F9|EN113_HUMAN	26.667	79	7.2	19	15	11	0	1	15	550	564	11.9
peptide6865	sp|Q902F9|EN113_HUMAN	30.435	79	6.8	29	23	12	1	1	23	606	624	12.7
peptide9613	sp|Q902F9|EN113_HUMAN	45.455	79	1.5	14	11	6	0	2	12	109	119	13.5
peptide13105	sp|Q902F9|EN113_HUMAN	45.455	79	0.29	14	11	6	0	2	12	330	340	15
peptide14264	sp|Q902F9|EN113_HUMAN	45.455	79	1.9	14	11	6	0	1	11	88	98	13.1
peptide15701	sp|Q902F9|EN113_HUMAN	46.667	79	0.16	19	15	8	0	5	19	666	680	15.8
peptide16227	sp|Q902F9|EN113_HUMAN	54.545	79	0.29	14	11	5	0	1	11	292	302	15
peptide16518	sp|Q902F9|EN113_HUMAN	71.429	79	3.1	14	7	2	0	3	9	93	99	12.7
peptide16518	sp|Q902F9|EN113_HUMAN	36.364	79	3.7	14	11	7	0	1	11	376	386	12.3
peptide18401	sp|Q902F9|EN113_HUMAN	30.435	79	6.8	29	23	12	1	1	23	606	624	12.7
peptide19414	sp|Q902F9|EN113_HUMAN	33.333	79	2.4	19	15	10	0	2	16	145	159	13.1
peptide273	sp|P62684|GA113_HUMAN	57.143	78	4.6	9	7	3	0	3	9	173	179	11.9
peptide1346	sp|P62684|GA113_HUMAN	57.143	78	4.6	9	7	3	0	3	9	173	179	11.9
peptide2430	sp|P62684|GA113_HUMAN	50	78	0.1	18	14	7	0	1	14	56	69	16.2
peptide3266	sp|P62684|GA113_HUMAN	50	78	0.028	18	14	7	0	1	14	641	654	17.7
peptide5279	sp|P62684|GA113_HUMAN	44.444	78	3	23	9	5	0	1	9	536	544	13.1
peptide5279	sp|P62684|GA113_HUMAN	44.444	78	9.6	23	9	5	0	10	18	536	544	11.9
peptide6330	sp|P62684|GA113_HUMAN	50	78	0.2	18	14	7	0	5	18	257	270	15.4
peptide6614	sp|P62684|GA113_HUMAN	57.143	78	2	18	14	5	1	4	17	613	625	13.5
peptide6987	sp|P62684|GA113_HUMAN	50	78	0.96	18	8	4	0	2	9	498	505	13.9
peptide6987	sp|P62684|GA113_HUMAN	36.364	78	6.3	18	11	7	0	5	15	445	455	12.3
peptide9593	sp|P62684|GA113_HUMAN	71.429	78	0.28	9	7	2	0	1	7	613	619	14.6
peptide9644	sp|P62684|GA113_HUMAN	71.429	78	0.39	9	7	2	0	2	8	185	191	14.2
peptide9946	sp|P62684|GA113_HUMAN	42.857	78	0.12	18	14	8	0	4	17	435	448	16.2
peptide10742	sp|P62684|GA113_HUMAN	40	78	1.4	18	15	8	1	5	18	170	184	13.9
peptide11903	sp|P62684|GA113_HUMAN	50	78	2.2	36	6	3	0	7	12	109	114	14.2
peptide11903	sp|P62684|GA113_HUMAN	38.462	78	3.2	36	13	8	0	20	32	654	666	13.9
peptide11903	sp|P62684|GA113_HUMAN	57.143	78	4.8	36	7	3	0	20	26	230	236	13.5
peptide11903	sp|P62684|GA113_HUMAN	30.435	78	6.2	36	23	16	0	5	27	237	259	13.1
peptide12363	sp|P62684|GA113_HUMAN	57.143	78	0.35	9	7	3	0	1	7	276	282	14.2
peptide12452	sp|P62684|GA113_HUMAN	42.857	78	6.9	9	7	4	0	3	9	369	375	11.5
peptide12576	sp|P62684|GA113_HUMAN	42.857	78	2.5	9	7	4	0	2	8	110	116	12.7
peptide13387	sp|P62684|GA113_HUMAN	57.143	78	1.4	9	7	3	0	2	8	427	433	13.1
peptide14068	sp|P62684|GA113_HUMAN	50	78	0.26	18	14	7	0	4	17	217	230	15.4
peptide14068	sp|P62684|GA113_HUMAN	45.455	78	5.5	18	11	6	0	5	15	251	261	12.3
peptide17530	sp|P62684|GA113_HUMAN	57.143	78	0.22	9	7	3	0	3	9	550	556	14.6
peptide19865	sp|P62684|GA113_HUMAN	42.857	78	0.13	18	14	8	0	1	14	384	397	15.8
peptide63	sp|P63132|PO113_HUMAN	28.571	78	0.76	27	21	14	1	3	23	837	856	15
peptide98	sp|P63132|PO113_HUMAN	28.571	78	0.76	27	21	14	1	3	23	837	856	15
peptide273	sp|P63132|PO113_HUMAN	57.143	78	2.3	9	7	3	0	2	8	103	109	12.7
peptide711	sp|P63132|PO113_HUMAN	42.857	78	0.32	18	14	8	0	5	18	137	150	15
peptide915	sp|P63132|PO113_HUMAN	33.333	78	1.6	27	9	6	0	11	19	168	176	14.2
peptide915	sp|P63132|PO113_HUMAN	50	78	2.6	27	8	4	0	5	12	697	704	13.5
peptide915	sp|P63132|PO113_HUMAN	66.667	78	2.6	27	6	2	0	21	26	423	428	13.5
peptide1346	sp|P63132|PO113_HUMAN	57.143	78	2.3	9	7	3	0	2	8	103	109	12.7
peptide3005	sp|P63132|PO113_HUMAN	33.333	78	0.64	23	18	12	0	2	19	705	722	14.6
peptide3965	sp|P63132|PO113_HUMAN	25	78	1.4	23	28	11	1	5	22	405	432	13.9
peptide5096	sp|P63132|PO113_HUMAN	28.571	78	5.9	18	14	10	0	5	18	939	952	12.3
peptide5822	sp|P63132|PO113_HUMAN	57.143	78	0.62	9	7	3	0	2	8	60	66	13.9
peptide5861	sp|P63132|PO113_HUMAN	71.429	78	0.052	9	7	2	0	2	8	777	783	16.2
peptide6557	sp|P63132|PO113_HUMAN	57.143	78	5.6	9	7	3	0	1	7	652	658	11.9
peptide7754	sp|P63132|PO113_HUMAN	71.429	78	0.1	9	7	2	0	1	7	932	938	15.4
peptide8191	sp|P63132|PO113_HUMAN	22.222	78	4.3	23	18	14	0	2	19	688	705	12.7
peptide8256	sp|P63132|PO113_HUMAN	35.714	78	3.6	18	14	9	0	1	14	527	540	12.7
peptide9849	sp|P63132|PO113_HUMAN	42.857	78	5.5	9	7	4	0	2	8	509	515	11.9
peptide9920	sp|P63132|PO113_HUMAN	57.143	78	0.041	9	7	3	0	1	7	186	192	16.2
peptide12054	sp|P63132|PO113_HUMAN	57.143	78	0.45	9	7	3	0	3	9	685	691	14.2
peptide12173	sp|P63132|PO113_HUMAN	42.857	78	0.13	18	14	8	0	1	14	392	405	15.8
peptide12256	sp|P63132|PO113_HUMAN	27.778	78	3.1	23	18	13	0	4	21	824	841	13.1
peptide13030	sp|P63132|PO113_HUMAN	71.429	78	0.36	9	7	2	0	1	7	203	209	14.2
peptide13822	sp|P63132|PO113_HUMAN	42.857	78	3.2	18	14	8	0	2	15	462	475	12.7
peptide14422	sp|P63132|PO113_HUMAN	71.429	78	1.3	9	7	2	0	3	9	364	370	13.1
peptide14623	sp|P63132|PO113_HUMAN	28.571	78	0.76	18	14	10	0	5	18	939	952	14.2
peptide14841	sp|P63132|PO113_HUMAN	57.143	78	1.2	9	7	3	0	3	9	144	150	13.1
peptide15629	sp|P63132|PO113_HUMAN	50	78	0.013	18	14	7	0	4	17	264	277	18.9
peptide16407	sp|P63132|PO113_HUMAN	42.857	78	1.6	9	7	4	0	3	9	157	163	13.1
peptide16407	sp|P63132|PO113_HUMAN	50	78	5.6	9	6	3	0	3	8	360	365	11.9
peptide17053	sp|P63132|PO113_HUMAN	57.143	78	0.38	9	7	3	0	3	9	716	722	14.2
peptide17269	sp|P63132|PO113_HUMAN	28.571	78	4	18	14	10	0	5	18	693	706	12.7
peptide18910	sp|P63132|PO113_HUMAN	57.143	78	0.44	9	7	3	0	1	7	412	418	14.2
peptide20092	sp|P63132|PO113_HUMAN	28.571	78	5.5	18	14	10	0	5	18	939	952	12.3
peptide20247	sp|P63132|PO113_HUMAN	42.105	78	0.2	32	19	8	1	2	17	267	285	16.5
peptide20247	sp|P63132|PO113_HUMAN	35	78	0.52	32	20	13	0	7	26	627	646	15.4
peptide313	sp|Q902F9|EN113_HUMAN	35.714	78	3	18	14	9	0	4	17	253	266	13.1
peptide672	sp|Q902F9|EN113_HUMAN	57.143	78	1.7	9	7	3	0	1	7	139	145	12.7
peptide920	sp|Q902F9|EN113_HUMAN	57.143	78	6.3	9	7	3	0	2	8	121	127	11.5
peptide1037	sp|Q902F9|EN113_HUMAN	71.429	78	0.29	9	7	2	0	1	7	58	64	14.6
peptide1347	sp|Q902F9|EN113_HUMAN	85.714	78	0.36	9	7	1	0	1	7	341	347	14.2
peptide3176	sp|Q902F9|EN113_HUMAN	57.143	78	0.15	9	7	3	0	3	9	335	341	15
peptide5343	sp|Q902F9|EN113_HUMAN	62.5	78	0.5	23	8	3	0	10	17	141	148	15
peptide5343	sp|Q902F9|EN113_HUMAN	28.571	78	2.6	23	14	10	0	5	18	135	148	13.5
peptide5343	sp|Q902F9|EN113_HUMAN	44.444	78	3.2	23	9	5	0	14	22	405	413	13.1
peptide7479	sp|Q902F9|EN113_HUMAN	42.857	78	1.2	9	7	4	0	2	8	553	559	13.1
peptide7486	sp|Q902F9|EN113_HUMAN	71.429	78	0.078	9	7	2	0	2	8	139	145	15.4
peptide8225	sp|Q902F9|EN113_HUMAN	66.667	78	0.24	18	6	2	0	13	18	577	582	15.4
peptide8225	sp|Q902F9|EN113_HUMAN	35.714	78	0.34	18	14	9	0	5	18	293	306	15
peptide8321	sp|Q902F9|EN113_HUMAN	27.778	78	0.055	23	18	13	0	4	21	320	337	17.3
peptide9536	sp|Q902F9|EN113_HUMAN	57.143	78	4.4	9	7	3	0	1	7	324	330	11.9
peptide10488	sp|Q902F9|EN113_HUMAN	57.143	78	0.31	9	7	3	0	3	9	435	441	14.2
peptide11557	sp|Q902F9|EN113_HUMAN	57.143	78	0.48	9	7	3	0	1	7	412	418	13.9
peptide11846	sp|Q902F9|EN113_HUMAN	57.143	78	5.5	9	7	3	0	3	9	412	418	11.9
peptide13426	sp|Q902F9|EN113_HUMAN	57.143	78	0.94	9	7	3	0	1	7	105	111	13.5
peptide15301	sp|Q902F9|EN113_HUMAN	25.926	78	0.73	23	27	11	1	2	19	168	194	14.6
peptide17533	sp|Q902F9|EN113_HUMAN	57.143	78	0.31	9	7	3	0	2	8	205	211	14.2
peptide19297	sp|Q902F9|EN113_HUMAN	42.857	78	2.5	9	7	4	0	2	8	362	368	12.7
peptide1037	sp|P61574|RE113_HUMAN	71.429	78	0.67	9	7	2	0	1	7	58	64	13.9
peptide13174	sp|P61574|RE113_HUMAN	42.857	78	3.2	18	14	8	0	4	17	91	104	13.1
peptide1266	sp|P62684|GA113_HUMAN	29.167	77	1.2	39	24	17	0	5	28	513	536	15
peptide1266	sp|P62684|GA113_HUMAN	66.667	77	2.3	39	6	2	0	34	39	452	457	14.2
peptide1907	sp|P62684|GA113_HUMAN	29.167	77	0.74	31	24	17	0	4	27	513	536	15
peptide2975	sp|P62684|GA113_HUMAN	41.176	77	0.089	22	17	10	0	6	22	441	457	16.9
peptide3404	sp|P62684|GA113_HUMAN	50	77	1.1	13	10	5	0	1	10	574	583	13.5
peptide3409	sp|P62684|GA113_HUMAN	60	77	0.032	13	10	4	0	4	13	53	62	17.3
peptide3509	sp|P62684|GA113_HUMAN	34.783	77	8.1	30	23	15	0	3	25	326	348	12.7
peptide4788	sp|P62684|GA113_HUMAN	66.667	77	2.4	13	6	2	0	5	10	234	239	12.7
peptide4788	sp|P62684|GA113_HUMAN	62.5	77	4.2	13	8	3	0	1	8	611	618	12.3
peptide4991	sp|P62684|GA113_HUMAN	60	77	0.15	13	10	4	0	3	12	158	167	15.4
peptide5027	sp|P62684|GA113_HUMAN	50	77	1.1	13	10	5	0	1	10	574	583	13.5
peptide5423	sp|P62684|GA113_HUMAN	40	77	8.3	13	10	6	0	2	11	604	613	11.5
peptide5952	sp|P62684|GA113_HUMAN	40	77	8.8	13	10	6	0	1	10	492	501	11.5
peptide6502	sp|P62684|GA113_HUMAN	29.412	77	4.6	22	17	12	0	6	22	596	612	12.7
peptide6829	sp|P62684|GA113_HUMAN	41.176	77	0.089	22	17	10	0	6	22	441	457	16.9
peptide7111	sp|P62684|GA113_HUMAN	40	77	8.8	13	10	6	0	1	10	492	501	11.5
peptide8885	sp|P62684|GA113_HUMAN	50	77	0.39	13	10	5	0	1	10	248	257	14.6
peptide8964	sp|P62684|GA113_HUMAN	40	77	1.9	13	10	6	0	4	13	371	380	13.1
peptide8968	sp|P62684|GA113_HUMAN	40	77	2.2	13	10	6	0	2	11	272	281	13.1
peptide9145	sp|P62684|GA113_HUMAN	40	77	5.1	13	10	6	0	3	12	574	583	11.9
peptide11833	sp|P62684|GA113_HUMAN	66.667	77	0.36	13	9	3	0	2	10	287	295	14.6
peptide11833	sp|P62684|GA113_HUMAN	42.857	77	9.7	13	7	4	0	1	7	226	232	11.5
peptide13711	sp|P62684|GA113_HUMAN	50	77	2.5	13	10	5	0	3	12	172	181	12.7
peptide15208	sp|P62684|GA113_HUMAN	29.412	77	4.6	22	17	12	0	6	22	596	612	12.7
peptide15781	sp|P62684|GA113_HUMAN	35.294	77	0.18	22	17	11	0	6	22	233	249	15.8
peptide17673	sp|P62684|GA113_HUMAN	40	77	0.89	13	10	6	0	2	11	388	397	13.9
peptide18635	sp|P62684|GA113_HUMAN	40	77	7.4	13	10	6	0	4	13	578	587	11.9
peptide19024	sp|P62684|GA113_HUMAN	30	77	2	26	20	14	0	1	20	136	155	13.9
peptide19230	sp|P62684|GA113_HUMAN	41.176	77	0.075	22	17	10	0	6	22	441	457	16.9
peptide1898	sp|P63121|VP113_HUMAN	50	77	1.2	13	10	5	0	3	12	38	47	13.5
peptide6019	sp|P63121|VP113_HUMAN	50	77	0.3	13	10	5	0	3	12	99	108	14.6
peptide9008	sp|P63121|VP113_HUMAN	28.571	77	0.37	35	28	19	1	1	27	46	73	16.2
peptide12570	sp|P63121|VP113_HUMAN	50	77	0.38	13	10	5	0	3	12	99	108	14.6
peptide1494	sp|P63132|PO113_HUMAN	40	77	1.2	13	10	6	0	4	13	943	952	13.5
peptide1678	sp|P63132|PO113_HUMAN	40	77	5.2	13	10	6	0	4	13	763	772	11.9
peptide4352	sp|P63132|PO113_HUMAN	50	77	1.1	13	10	5	0	1	10	624	633	13.5
peptide5352	sp|P63132|PO113_HUMAN	50	77	0.42	13	10	5	0	4	13	526	535	14.6
peptide5952	sp|P63132|PO113_HUMAN	30	77	0.78	13	10	7	0	3	12	107	116	13.9
peptide7111	sp|P63132|PO113_HUMAN	30	77	0.78	13	10	7	0	3	12	107	116	13.9
peptide8149	sp|P63132|PO113_HUMAN	55.556	77	0.54	13	9	4	0	4	12	401	409	14.2
peptide8149	sp|P63132|PO113_HUMAN	50	77	2.5	13	10	5	0	3	12	94	103	12.7
peptide9608	sp|P63132|PO113_HUMAN	50	77	3.4	13	10	5	0	1	10	868	877	12.3
peptide9647	sp|P63132|PO113_HUMAN	50	77	1	13	10	5	0	3	12	418	427	13.5
peptide11255	sp|P63132|PO113_HUMAN	40	77	0.57	22	10	6	0	8	17	12	21	14.6
peptide11255	sp|P63132|PO113_HUMAN	29.412	77	1.8	22	17	12	0	2	18	265	281	13.9
peptide12749	sp|P63132|PO113_HUMAN	40	77	5.2	13	10	6	0	1	10	722	731	11.9
peptide13711	sp|P63132|PO113_HUMAN	50	77	4.3	13	10	5	0	4	13	280	289	12.3
peptide13821	sp|P63132|PO113_HUMAN	50	77	0.11	13	10	5	0	2	11	100	109	15.8
peptide14474	sp|P63132|PO113_HUMAN	40	77	0.52	13	10	6	0	1	10	110	119	14.2
peptide15315	sp|P63132|PO113_HUMAN	50	77	0.77	13	10	5	0	4	13	249	258	13.9
peptide15843	sp|P63132|PO113_HUMAN	50	77	1.1	13	10	5	0	1	10	624	633	13.5
peptide16042	sp|P63132|PO113_HUMAN	50	77	0.8	13	6	3	0	2	7	416	421	13.9
peptide16042	sp|P63132|PO113_HUMAN	50	77	2.1	13	6	3	0	6	11	815	820	13.1
peptide16106	sp|P63132|PO113_HUMAN	50	77	1.6	13	10	5	0	4	13	141	150	13.1
peptide17126	sp|P63132|PO113_HUMAN	62.5	77	1	30	8	3	0	3	10	593	600	14.6
peptide17126	sp|P63132|PO113_HUMAN	35.294	77	3.4	30	17	11	0	9	25	674	690	13.5
peptide644	sp|Q902F9|EN113_HUMAN	26.087	77	7.2	30	23	17	0	7	29	317	339	12.7
peptide644	sp|Q902F9|EN113_HUMAN	57.143	77	7.7	30	7	3	0	23	29	200	206	12.7
peptide1569	sp|Q902F9|EN113_HUMAN	26.087	77	7.2	30	23	17	0	7	29	317	339	12.7
peptide1569	sp|Q902F9|EN113_HUMAN	57.143	77	7.7	30	7	3	0	23	29	200	206	12.7
peptide1960	sp|Q902F9|EN113_HUMAN	35.294	77	1.1	22	17	11	0	5	21	599	615	14.2
peptide3776	sp|Q902F9|EN113_HUMAN	25.926	77	4.2	35	27	20	0	4	30	152	178	13.5
peptide3776	sp|Q902F9|EN113_HUMAN	57.143	77	4.2	35	7	3	0	4	10	605	611	13.5
peptide3786	sp|Q902F9|EN113_HUMAN	26.087	77	7.2	30	23	17	0	7	29	317	339	12.7
peptide3786	sp|Q902F9|EN113_HUMAN	57.143	77	7.7	30	7	3	0	23	29	200	206	12.7
peptide6647	sp|Q902F9|EN113_HUMAN	50	77	0.33	13	10	5	0	1	10	406	415	14.6
peptide7574	sp|Q902F9|EN113_HUMAN	40	77	0.41	26	20	12	0	3	22	47	66	15.4
peptide7574	sp|Q902F9|EN113_HUMAN	66.667	77	3	26	6	2	0	5	10	33	38	13.5
peptide8355	sp|Q902F9|EN113_HUMAN	40	77	0.39	13	10	6	0	2	11	270	279	14.6
peptide9397	sp|Q902F9|EN113_HUMAN	26.087	77	7.2	30	23	17	0	7	29	317	339	12.7
peptide9397	sp|Q902F9|EN113_HUMAN	57.143	77	7.7	30	7	3	0	23	29	200	206	12.7
peptide10641	sp|Q902F9|EN113_HUMAN	30	77	2	26	20	14	0	4	23	270	289	13.9
peptide13473	sp|Q902F9|EN113_HUMAN	40	77	7.5	13	10	6	0	4	13	126	135	11.5
peptide14487	sp|Q902F9|EN113_HUMAN	60	77	0.015	13	10	4	0	4	13	135	144	18.1
peptide14657	sp|Q902F9|EN113_HUMAN	50	77	0.089	13	10	5	0	3	12	197	206	15.8
peptide14704	sp|Q902F9|EN113_HUMAN	50	77	6	22	8	4	0	3	10	168	175	12.3
peptide14704	sp|Q902F9|EN113_HUMAN	36.364	77	9.6	22	11	7	0	9	19	609	619	11.9
peptide18407	sp|Q902F9|EN113_HUMAN	23.529	77	0.72	22	17	13	0	4	20	258	274	14.6
peptide19975	sp|Q902F9|EN113_HUMAN	50	77	0.55	13	10	5	0	3	12	101	110	14.2
peptide5103	sp|P61574|RE113_HUMAN	40	77	7.9	13	10	6	0	2	11	89	98	11.9
peptide7574	sp|P61574|RE113_HUMAN	40	77	0.62	26	20	12	0	3	22	47	66	15
peptide7574	sp|P61574|RE113_HUMAN	66.667	77	4.2	26	6	2	0	5	10	33	38	13.1
peptide3601	sp|P62684|GA113_HUMAN	53.846	76	0.11	17	13	6	0	5	17	486	498	16.2
peptide7441	sp|P62684|GA113_HUMAN	42.105	76	0.11	25	19	9	1	5	23	515	531	16.9
peptide7512	sp|P62684|GA113_HUMAN	31.25	76	0.2	21	16	11	0	5	20	95	110	15.8
peptide10287	sp|P62684|GA113_HUMAN	34.615	76	2	29	26	13	1	3	24	428	453	13.9
peptide10619	sp|P62684|GA113_HUMAN	41.667	76	1.2	17	12	7	0	5	16	224	235	13.9
peptide10619	sp|P62684|GA113_HUMAN	55.556	76	2.2	17	9	4	0	4	12	651	659	13.1
peptide11576	sp|P62684|GA113_HUMAN	43.75	76	0.34	21	16	9	0	2	17	93	108	15.4
peptide16927	sp|P62684|GA113_HUMAN	31.25	76	0.31	21	16	11	0	3	18	230	245	15.4
peptide16927	sp|P62684|GA113_HUMAN	44.444	76	3.5	21	9	5	0	9	17	617	625	13.1
peptide17913	sp|P62684|GA113_HUMAN	36.364	76	3.5	25	11	7	0	11	21	207	217	13.1
peptide17913	sp|P62684|GA113_HUMAN	31.579	76	7.6	25	19	13	0	7	25	220	238	12.3
peptide18862	sp|P62684|GA113_HUMAN	38.462	76	4.7	17	13	8	0	4	16	438	450	12.3
peptide18994	sp|P62684|GA113_HUMAN	40	76	4	21	10	6	0	7	16	236	245	12.7
peptide18994	sp|P62684|GA113_HUMAN	35.294	76	9.9	21	17	9	1	1	15	609	625	11.9
peptide19156	sp|P62684|GA113_HUMAN	57.143	76	1.3	17	7	3	0	4	10	221	227	13.5
peptide19156	sp|P62684|GA113_HUMAN	46.154	76	2.8	17	13	7	0	2	14	654	666	13.1
peptide19666	sp|P62684|GA113_HUMAN	71.429	76	0.26	17	7	2	0	11	17	244	250	15
peptide19666	sp|P62684|GA113_HUMAN	41.667	76	0.45	17	12	7	0	5	16	609	620	14.6
peptide18852	sp|P63121|VP113_HUMAN	37.5	76	1.2	21	16	10	0	4	19	141	156	13.9
peptide191	sp|P63132|PO113_HUMAN	38.462	76	1.5	17	13	8	0	1	13	362	374	13.5
peptide878	sp|P63132|PO113_HUMAN	38.462	76	0.7	17	13	8	0	1	13	393	405	14.2
peptide1324	sp|P63132|PO113_HUMAN	38.462	76	1.2	17	13	8	0	1	13	753	765	13.9
peptide1752	sp|P63132|PO113_HUMAN	66.667	76	0.52	17	6	2	0	7	12	143	148	14.6
peptide1752	sp|P63132|PO113_HUMAN	30.769	76	8.2	17	13	9	0	5	17	716	728	11.9
peptide2067	sp|P63132|PO113_HUMAN	46.154	76	0.084	17	13	7	0	4	16	391	403	16.5
peptide2782	sp|P63132|PO113_HUMAN	31.25	76	0.61	21	16	10	1	3	18	837	851	14.6
peptide2844	sp|P63132|PO113_HUMAN	42.105	76	0.23	33	19	8	1	3	18	267	285	16.5
peptide2844	sp|P63132|PO113_HUMAN	35	76	0.58	33	20	13	0	8	27	627	646	15.4
peptide4199	sp|P63132|PO113_HUMAN	30.769	76	6	17	13	9	0	3	15	806	818	12.3
peptide4270	sp|P63132|PO113_HUMAN	31.25	76	0.61	21	16	10	1	3	18	837	851	14.6
peptide5601	sp|P63132|PO113_HUMAN	46.154	76	0.23	17	13	7	0	1	13	97	109	15.4
peptide6701	sp|P63132|PO113_HUMAN	40	76	0.07	25	20	11	1	6	24	97	116	17.3
peptide7043	sp|P63132|PO113_HUMAN	31.579	76	2.1	25	19	13	0	2	20	930	948	13.9
peptide7677	sp|P63132|PO113_HUMAN	30.769	76	6.1	17	13	9	0	3	15	935	947	12.3
peptide9519	sp|P63132|PO113_HUMAN	23.077	76	6.5	17	13	10	0	5	17	899	911	11.9
peptide11189	sp|P63132|PO113_HUMAN	31.818	76	0.37	29	22	15	0	8	29	871	892	15.8
peptide11604	sp|P63132|PO113_HUMAN	30.769	76	3.2	17	13	9	0	2	14	200	212	12.7
peptide15072	sp|P63132|PO113_HUMAN	21.053	76	6.2	25	19	15	0	1	19	220	238	12.7
peptide15278	sp|P63132|PO113_HUMAN	50	76	0.019	21	16	8	0	6	21	888	903	18.5
peptide15462	sp|P63132|PO113_HUMAN	35.294	76	1.4	21	17	10	1	2	17	191	207	13.9
peptide15850	sp|P63132|PO113_HUMAN	30.769	76	3.8	17	13	9	0	1	13	339	351	12.7
peptide16462	sp|P63132|PO113_HUMAN	38.462	76	0.01	25	13	8	0	2	14	128	140	19.6
peptide16462	sp|P63132|PO113_HUMAN	33.333	76	3.9	25	15	10	0	6	20	200	214	13.1
peptide19937	sp|P63132|PO113_HUMAN	38.462	76	0.09	17	13	8	0	3	15	616	628	16.2
peptide20011	sp|P63132|PO113_HUMAN	30.769	76	1	34	26	18	0	3	28	260	285	15
peptide20011	sp|P63132|PO113_HUMAN	66.667	76	2.4	34	6	2	0	13	18	640	645	14.2
peptide20251	sp|P63132|PO113_HUMAN	36.842	76	0.43	25	19	12	0	2	20	930	948	15.4
peptide6374	sp|Q902F9|EN113_HUMAN	46.154	76	0.34	17	13	6	1	4	16	135	146	15
peptide12017	sp|Q902F9|EN113_HUMAN	37.5	76	1.1	21	16	10	0	3	18	575	590	14.2
peptide13670	sp|Q902F9|EN113_HUMAN	47.368	76	0.028	25	19	10	0	7	25	283	301	18.5
peptide14349	sp|Q902F9|EN113_HUMAN	46.154	76	0.34	17	13	6	1	4	16	135	146	15
peptide15030	sp|Q902F9|EN113_HUMAN	62.5	76	0.76	25	8	3	0	3	10	168	175	14.6
peptide15030	sp|Q902F9|EN113_HUMAN	35.714	76	1.4	25	14	9	0	8	21	135	148	14.2
peptide15030	sp|Q902F9|EN113_HUMAN	40	76	2.3	25	10	6	0	7	16	281	290	13.5
peptide283	sp|P62684|GA113_HUMAN	71.429	75	0.52	20	7	2	0	1	7	613	619	14.6
peptide283	sp|P62684|GA113_HUMAN	83.333	75	1.1	20	6	1	0	10	15	254	259	14.2
peptide283	sp|P62684|GA113_HUMAN	44.444	75	5.7	20	18	7	1	1	15	232	249	12.3
peptide283	sp|P62684|GA113_HUMAN	50	75	8	20	8	4	0	6	13	652	659	11.9
peptide455	sp|P62684|GA113_HUMAN	44.444	75	2.8	12	9	5	0	2	10	645	653	12.7
peptide508	sp|P62684|GA113_HUMAN	29.167	75	0.78	32	24	17	0	5	28	513	536	15
peptide1065	sp|P62684|GA113_HUMAN	55.556	75	0.48	24	9	4	0	12	20	236	244	15
peptide1065	sp|P62684|GA113_HUMAN	34.783	75	3.1	24	23	10	1	4	21	164	186	13.1
peptide1116	sp|P62684|GA113_HUMAN	66.667	75	0.1	8	6	2	0	2	7	579	584	15.4
peptide1583	sp|P62684|GA113_HUMAN	50	75	0.025	8	6	3	0	1	6	367	372	16.9
peptide2068	sp|P62684|GA113_HUMAN	46.667	75	0.084	20	15	8	0	2	16	55	69	16.5
peptide3087	sp|P62684|GA113_HUMAN	44.444	75	1.9	12	9	5	0	2	10	295	303	13.1
peptide5024	sp|P62684|GA113_HUMAN	33.333	75	2.7	20	15	10	0	6	20	606	620	13.1
peptide5207	sp|P62684|GA113_HUMAN	44.444	75	4.5	12	9	5	0	4	12	371	379	12.3
peptide5214	sp|P62684|GA113_HUMAN	44.444	75	8.4	12	9	5	0	1	9	623	631	11.5
peptide5499	sp|P62684|GA113_HUMAN	50	75	3.4	20	12	6	0	5	16	290	301	13.1
peptide5499	sp|P62684|GA113_HUMAN	40	75	4.2	20	15	9	0	4	18	608	622	12.7
peptide5604	sp|P62684|GA113_HUMAN	83.333	75	0.19	8	6	1	0	1	6	76	81	14.6
peptide5619	sp|P62684|GA113_HUMAN	33.333	75	3.8	16	12	8	0	5	16	459	470	12.7
peptide6484	sp|P62684|GA113_HUMAN	41.667	75	0.6	16	12	7	0	4	15	391	402	14.2
peptide7390	sp|P62684|GA113_HUMAN	33.333	75	1.8	16	12	8	0	5	16	459	470	13.5
peptide7582	sp|P62684|GA113_HUMAN	57.143	75	0.036	24	7	3	0	13	19	369	375	18.1
peptide7582	sp|P62684|GA113_HUMAN	14.286	75	4.6	24	14	12	0	2	15	339	352	12.7
peptide7590	sp|P62684|GA113_HUMAN	50	75	0.034	24	12	5	1	9	19	364	375	18.1
peptide7590	sp|P62684|GA113_HUMAN	14.286	75	5.9	24	14	12	0	2	15	339	352	12.7
peptide7602	sp|P62684|GA113_HUMAN	33.333	75	0.8	16	12	8	0	4	15	220	231	14.2
peptide7685	sp|P62684|GA113_HUMAN	33.333	75	0.73	20	15	10	0	1	15	98	112	14.6
peptide7687	sp|P62684|GA113_HUMAN	33.333	75	0.73	20	15	10	0	1	15	98	112	14.6
peptide8503	sp|P62684|GA113_HUMAN	50	75	0.093	16	12	6	0	5	16	107	118	16.2
peptide8575	sp|P62684|GA113_HUMAN	55.556	75	6.4	12	9	4	0	4	12	412	420	11.9
peptide8741	sp|P62684|GA113_HUMAN	33.333	75	0.18	20	12	8	0	2	13	591	602	15.8
peptide8741	sp|P62684|GA113_HUMAN	26.667	75	2.7	20	15	11	0	1	15	401	415	13.1
peptide8815	sp|P62684|GA113_HUMAN	44.444	75	2.1	12	9	5	0	2	10	297	305	13.1
peptide9005	sp|P62684|GA113_HUMAN	55.556	75	0.09	12	9	4	0	2	10	453	461	15.8
peptide9055	sp|P62684|GA113_HUMAN	33.333	75	6.9	28	21	14	0	1	21	497	517	12.7
peptide9231	sp|P62684|GA113_HUMAN	33.333	75	1.8	16	12	8	0	5	16	459	470	13.5
peptide10060	sp|P62684|GA113_HUMAN	66.667	75	1.3	8	6	2	0	2	7	599	604	13.1
peptide10499	sp|P62684|GA113_HUMAN	26.667	75	1.4	20	15	11	0	1	15	41	55	13.9
peptide10574	sp|P62684|GA113_HUMAN	44.444	75	0.62	12	9	5	0	2	10	524	532	13.9
peptide10606	sp|P62684|GA113_HUMAN	66.667	75	1.8	8	6	2	0	2	7	447	452	12.7
peptide11439	sp|P62684|GA113_HUMAN	50	75	0.093	16	12	6	0	5	16	107	118	16.2
peptide11592	sp|P62684|GA113_HUMAN	38.889	75	0.95	24	18	11	0	5	22	607	624	14.6
peptide11592	sp|P62684|GA113_HUMAN	55.556	75	7.1	24	9	4	0	11	19	236	244	12.3
peptide11595	sp|P62684|GA113_HUMAN	50	75	1.8	16	12	6	0	3	14	607	618	13.5
peptide11871	sp|P62684|GA113_HUMAN	44.444	75	4.3	12	9	5	0	3	11	651	659	12.3
peptide12070	sp|P62684|GA113_HUMAN	42.857	75	1.4	20	7	4	0	7	13	207	213	13.9
peptide12070	sp|P62684|GA113_HUMAN	20	75	7.8	20	15	12	0	3	17	417	431	11.9
peptide12281	sp|P62684|GA113_HUMAN	66.667	75	0.3	16	9	3	0	8	16	658	666	15
peptide12281	sp|P62684|GA113_HUMAN	36.364	75	0.76	16	11	7	0	5	15	211	221	14.2
peptide12315	sp|P62684|GA113_HUMAN	41.667	75	8.5	16	12	7	0	5	16	107	118	11.9
peptide12315	sp|P62684|GA113_HUMAN	57.143	75	8.7	16	7	3	0	6	12	290	296	11.9
peptide12422	sp|P62684|GA113_HUMAN	83.333	75	0.63	8	6	1	0	2	7	293	298	13.9
peptide12823	sp|P62684|GA113_HUMAN	33.333	75	7.5	12	9	6	0	2	10	261	269	11.5
peptide14591	sp|P62684|GA113_HUMAN	50	75	0.49	8	6	3	0	3	8	82	87	13.9
peptide15580	sp|P62684|GA113_HUMAN	83.333	75	0.19	8	6	1	0	1	6	530	535	14.6
peptide16141	sp|P62684|GA113_HUMAN	33.333	75	3.8	16	12	8	0	5	16	459	470	12.7
peptide17935	sp|P62684|GA113_HUMAN	41.667	75	0.38	16	12	7	0	5	16	50	61	14.6
peptide18575	sp|P62684|GA113_HUMAN	45.455	75	4.1	24	11	6	0	7	17	185	195	13.1
peptide18575	sp|P62684|GA113_HUMAN	28.571	75	4.5	24	14	10	0	4	17	481	494	13.1
peptide18575	sp|P62684|GA113_HUMAN	33.333	75	9.8	24	12	8	0	10	21	594	605	11.9
peptide19415	sp|P62684|GA113_HUMAN	40	75	6.4	20	15	9	0	3	17	330	344	12.3
peptide19530	sp|P62684|GA113_HUMAN	33.333	75	1.1	12	9	6	0	2	10	387	395	13.5
peptide19647	sp|P62684|GA113_HUMAN	50	75	0.83	8	6	3	0	1	6	366	371	13.5
peptide19658	sp|P62684|GA113_HUMAN	55.556	75	0.97	12	9	4	0	4	12	503	511	13.5
peptide3918	sp|P63121|VP113_HUMAN	44.444	75	5.5	12	9	5	0	4	12	130	138	11.9
peptide4509	sp|P63121|VP113_HUMAN	66.667	75	1.4	8	6	2	0	1	6	75	80	13.1
peptide13460	sp|P63121|VP113_HUMAN	66.667	75	0.34	8	6	2	0	2	7	72	77	14.2
peptide13802	sp|P63121|VP113_HUMAN	55.556	75	0.64	12	9	4	0	2	10	63	71	13.9
peptide17880	sp|P63121|VP113_HUMAN	33.333	75	0.53	16	12	8	0	5	16	101	112	14.6
peptide20036	sp|P63121|VP113_HUMAN	33.333	75	1.9	20	15	10	0	2	16	28	42	13.5
peptide20140	sp|P63121|VP113_HUMAN	55.556	75	0.17	12	9	4	0	3	11	74	82	15
peptide124	sp|P63132|PO113_HUMAN	33.333	75	0.45	32	24	16	0	2	25	393	416	15.8
peptide1019	sp|P63132|PO113_HUMAN	44.444	75	1.6	12	9	5	0	3	11	205	213	13.1
peptide1351	sp|P63132|PO113_HUMAN	66.667	75	0.45	8	6	2	0	3	8	657	662	13.9
peptide2039	sp|P63132|PO113_HUMAN	44.444	75	0.083	12	9	5	0	1	9	785	793	15.8
peptide2206	sp|P63132|PO113_HUMAN	55.556	75	0.052	24	9	4	0	10	18	165	173	17.7
peptide2206	sp|P63132|PO113_HUMAN	50	75	2.1	24	6	3	0	12	17	711	716	13.5
peptide2206	sp|P63132|PO113_HUMAN	31.25	75	2.7	24	16	11	0	1	16	645	660	13.5
peptide2453	sp|P63132|PO113_HUMAN	44.444	75	2	12	9	5	0	2	10	251	259	13.1
peptide2824	sp|P63132|PO113_HUMAN	44.444	75	2	12	9	5	0	2	10	251	259	13.1
peptide3033	sp|P63132|PO113_HUMAN	66.667	75	1.9	8	6	2	0	2	7	355	360	12.7
peptide3275	sp|P63132|PO113_HUMAN	66.667	75	0.48	8	6	2	0	2	7	936	941	13.9
peptide3812	sp|P63132|PO113_HUMAN	44.444	75	0.7	12	9	5	0	2	10	627	635	13.9
peptide3861	sp|P63132|PO113_HUMAN	50	75	0.26	8	6	3	0	1	6	187	192	14.6
peptide5399	sp|P63132|PO113_HUMAN	44.444	75	0.75	12	9	5	0	2	10	627	635	13.9
peptide5679	sp|P63132|PO113_HUMAN	26.667	75	0.93	20	15	11	0	1	15	848	862	14.2
peptide5928	sp|P63132|PO113_HUMAN	46.154	75	0.04	20	13	7	0	2	14	851	863	17.7
peptide5928	sp|P63132|PO113_HUMAN	40	75	0.14	20	10	6	0	7	16	127	136	16.2
peptide6104	sp|P63132|PO113_HUMAN	44.444	75	5.4	12	9	5	0	2	10	25	33	11.9
[truncated: 5,893 more rows]

## Sheet: All_50%_ID_50%_Cover_Pep20aa_al
Peptides	HERV	% OF IDENTICAL MATCHES	COVER	evalue	Pep sequence length	Alignment length	MISTACHES	GAPS	Start of alignment in query	End of alignment in query	Start of alignment in subject	End of alignment in subject	Bitscore
peptide4229	sp|P62684|GA113_HUMAN	50	63	8.4	46	10	5	0	2	11	207	216	13.1
peptide1573	sp|P62684|GA113_HUMAN	50	85	0.065	33	12	5	1	18	28	364	375	18.1
peptide7793	sp|P62684|GA113_HUMAN	50	61	1.5	33	12	6	0	1	12	613	624	14.6
peptide3869	sp|P62684|GA113_HUMAN	50	97	0.27	32	16	8	0	16	31	613	628	16.2
peptide3869	sp|P62684|GA113_HUMAN	50	97	1.1	32	14	7	0	1	14	615	628	14.6
peptide7794	sp|P62684|GA113_HUMAN	50	58	7.5	31	10	5	0	1	10	615	624	12.7
peptide7402	sp|P62684|GA113_HUMAN	54.545	100	0.24	27	11	5	0	14	24	235	245	16.2
peptide11170	sp|P62684|GA113_HUMAN	50	96	0.16	26	10	5	0	16	25	216	225	16.5
peptide12318	sp|P62684|GA113_HUMAN	50	69	0.07	26	10	5	0	5	14	591	600	17.3
peptide13781	sp|P62684|GA113_HUMAN	50	69	0.027	26	12	5	1	11	21	364	375	18.5
peptide2217	sp|P62684|GA113_HUMAN	50	80	3.6	25	20	9	1	4	23	613	631	13.1
peptide2217	sp|P62684|GA113_HUMAN	50	80	4.6	25	12	6	0	12	23	319	330	13.1
peptide4296	sp|P62684|GA113_HUMAN	50	92	0.85	25	12	6	0	1	12	613	624	14.6
peptide5807	sp|P62684|GA113_HUMAN	54.545	80	1.6	25	11	5	0	5	15	615	625	13.9
peptide12752	sp|P62684|GA113_HUMAN	54.545	52	0.37	25	11	5	0	11	21	207	217	15.4
peptide13780	sp|P62684|GA113_HUMAN	50	72	0.03	25	12	5	1	10	20	364	375	18.5
peptide15072	sp|P62684|GA113_HUMAN	50	64	0.53	25	18	7	1	10	25	476	493	15
peptide1632	sp|P62684|GA113_HUMAN	54.545	83	1.7	24	11	5	0	4	14	615	625	13.9
peptide7590	sp|P62684|GA113_HUMAN	50	75	0.034	24	12	5	1	9	19	364	375	18.1
peptide9024	sp|P62684|GA113_HUMAN	53.846	54	0.33	24	13	6	0	3	15	531	543	15.4
peptide9943	sp|P62684|GA113_HUMAN	50	96	0.69	24	12	6	0	1	12	613	624	14.6
peptide10489	sp|P62684|GA113_HUMAN	64.286	92	0.74	24	14	4	1	3	16	232	244	14.6
peptide10489	sp|P62684|GA113_HUMAN	53.846	92	2.9	24	13	6	0	4	16	222	234	13.5
peptide10489	sp|P62684|GA113_HUMAN	50	92	8.1	24	10	5	0	1	10	178	187	12.3
peptide4826	sp|P62684|GA113_HUMAN	50	100	0.6	23	12	6	0	1	12	613	624	15
peptide8517	sp|P62684|GA113_HUMAN	58.333	100	0.23	23	12	5	0	3	14	232	243	15.8
peptide8517	sp|P62684|GA113_HUMAN	52.381	100	0.64	23	21	8	1	4	22	222	242	14.6
peptide8517	sp|P62684|GA113_HUMAN	50	100	7.8	23	10	5	0	1	10	178	187	12.3
peptide9690	sp|P62684|GA113_HUMAN	50	87	0.4	23	14	7	0	10	23	257	270	15.4
peptide11679	sp|P62684|GA113_HUMAN	50	52	0.044	23	12	6	0	2	13	588	599	17.7
peptide15945	sp|P62684|GA113_HUMAN	50	87	2.9	23	20	9	1	2	21	613	631	13.5
peptide15945	sp|P62684|GA113_HUMAN	50	87	4.4	23	12	6	0	10	21	319	330	12.7
peptide1778	sp|P62684|GA113_HUMAN	50	82	1.1	22	12	6	0	10	21	257	268	14.2
peptide2450	sp|P62684|GA113_HUMAN	50	55	2.2	22	12	6	0	7	18	86	97	13.5
peptide10490	sp|P62684|GA113_HUMAN	50	91	2.2	22	20	9	1	1	20	613	631	13.5
peptide10490	sp|P62684|GA113_HUMAN	50	91	4.4	22	12	6	0	9	20	319	330	12.7
peptide15662	sp|P62684|GA113_HUMAN	54.545	50	0.45	22	11	5	0	2	12	458	468	15
peptide2055	sp|P62684|GA113_HUMAN	54.545	52	0.91	21	11	5	0	4	14	23	33	14.2
peptide3441	sp|P62684|GA113_HUMAN	54.545	52	0.6	21	11	5	0	11	21	23	33	14.6
peptide14613	sp|P62684|GA113_HUMAN	50	100	4.1	21	10	5	0	1	10	615	624	12.7
peptide14816	sp|P62684|GA113_HUMAN	50	67	3.1	21	12	6	0	6	17	290	301	13.1
peptide14816	sp|P62684|GA113_HUMAN	50	67	4.8	21	10	5	0	10	19	613	622	12.7
peptide16772	sp|P62684|GA113_HUMAN	63.636	57	0.44	21	11	4	0	6	16	236	246	15
peptide16772	sp|P62684|GA113_HUMAN	60	57	0.48	21	10	4	0	8	17	227	236	15
peptide17218	sp|P62684|GA113_HUMAN	50	57	2	21	12	6	0	6	17	86	97	13.5
peptide1829	sp|P62684|GA113_HUMAN	53.846	65	0.32	20	13	6	0	7	19	218	230	15
peptide3524	sp|P62684|GA113_HUMAN	50	60	6.6	20	12	6	0	3	14	451	462	12.3
peptide5481	sp|P62684|GA113_HUMAN	50	85	3.9	20	12	6	0	4	15	290	301	12.7
peptide5499	sp|P62684|GA113_HUMAN	50	75	3.4	20	12	6	0	5	16	290	301	13.1
peptide5552	sp|P62684|GA113_HUMAN	50	50	8.4	20	10	5	0	3	12	221	230	11.9
peptide6807	sp|P62684|GA113_HUMAN	50	50	2.2	20	10	5	0	6	15	610	619	13.5
peptide11155	sp|P62684|GA113_HUMAN	50	50	8.4	20	10	5	0	8	17	158	167	11.9
peptide15209	sp|P62684|GA113_HUMAN	50	60	6.6	20	12	6	0	3	14	451	462	12.3
peptide15950	sp|P62684|GA113_HUMAN	50	60	3.3	20	12	6	0	7	18	319	330	13.1
peptide16512	sp|P62684|GA113_HUMAN	54.545	55	2	20	11	5	0	5	15	207	217	13.5
peptide18608	sp|P62684|GA113_HUMAN	50	60	0.052	20	12	6	0	9	20	506	517	17.3
peptide18672	sp|P62684|GA113_HUMAN	50	60	0.19	20	12	6	0	9	20	229	240	15.8
peptide179	sp|P63121|VP113_HUMAN	52.941	55	0.019	31	17	8	0	1	17	25	41	19.2
peptide2129	sp|P63121|VP113_HUMAN	50	53	0.066	30	16	8	0	1	16	26	41	17.7
peptide7755	sp|P63121|VP113_HUMAN	50	50	0.14	24	12	6	0	8	19	135	146	16.5
peptide19203	sp|P63121|VP113_HUMAN	50	52	0.092	23	12	6	0	4	15	68	79	16.9
peptide7825	sp|P63121|VP113_HUMAN	50	55	0.035	22	12	6	0	8	19	105	116	18.1
peptide13789	sp|P63121|VP113_HUMAN	50	57	0.95	21	12	6	0	4	15	63	74	14.2
peptide16127	sp|P63121|VP113_HUMAN	60	50	0.041	20	10	4	0	4	13	128	137	17.7
peptide7343	sp|P63132|PO113_HUMAN	50	79	7.8	43	10	5	0	32	41	871	880	13.1
peptide418	sp|P63132|PO113_HUMAN	50	56	0.58	41	10	5	0	26	35	637	646	16.2
peptide16284	sp|P63132|PO113_HUMAN	52.381	58	0.32	36	21	8	1	12	32	253	271	16.5
peptide2982	sp|P63132|PO113_HUMAN	52.941	50	0.028	34	17	5	1	2	18	943	956	19.2
peptide5888	sp|P63132|PO113_HUMAN	50	59	1.6	34	10	5	0	8	17	832	841	14.6
peptide18221	sp|P63132|PO113_HUMAN	52.941	50	0.028	34	17	5	1	4	20	943	956	19.2
peptide1376	sp|P63132|PO113_HUMAN	52.941	52	0.027	33	17	5	1	2	18	943	956	19.2
peptide5775	sp|P63132|PO113_HUMAN	52.941	52	0.027	33	17	5	1	4	20	943	956	19.2
peptide18208	sp|P63132|PO113_HUMAN	52.941	53	0.025	32	17	5	1	1	17	943	956	19.2
peptide5004	sp|P63132|PO113_HUMAN	52.941	55	0.025	31	17	5	1	4	20	943	956	18.9
peptide14878	sp|P63132|PO113_HUMAN	60	71	0.46	31	10	4	0	21	30	14	23	15.8
peptide6076	sp|P63132|PO113_HUMAN	53.333	50	0.1	30	15	4	1	1	15	945	956	17.3
peptide9554	sp|P63132|PO113_HUMAN	54.545	57	5	30	11	5	0	6	16	468	478	13.1
peptide648	sp|P63132|PO113_HUMAN	50	69	1.3	29	10	5	0	3	12	832	841	14.6
peptide799	sp|P63132|PO113_HUMAN	50	69	1.3	29	10	5	0	3	12	832	841	14.6
peptide8734	sp|P63132|PO113_HUMAN	50	69	1.2	29	10	5	0	3	12	832	841	14.6
peptide8735	sp|P63132|PO113_HUMAN	50	69	1.2	29	10	5	0	3	12	832	841	14.6
peptide20095	sp|P63132|PO113_HUMAN	50	69	0.44	29	10	5	0	3	12	832	841	15.4
peptide11929	sp|P63132|PO113_HUMAN	50	71	0.41	28	10	5	0	2	11	832	841	15.4
peptide16903	sp|P63132|PO113_HUMAN	50	54	0.43	28	10	5	0	14	23	12	21	15.4
peptide136	sp|P63132|PO113_HUMAN	50	59	5.8	27	10	5	0	1	10	94	103	12.7
peptide1125	sp|P63132|PO113_HUMAN	57.143	93	0.19	27	14	4	1	13	26	12	23	16.2
peptide13661	sp|P63132|PO113_HUMAN	54.545	63	3.3	27	11	5	0	3	13	468	478	13.5
peptide16278	sp|P63132|PO113_HUMAN	58.824	65	0.22	26	17	5	1	6	22	257	271	16.2
peptide20129	sp|P63132|PO113_HUMAN	50	80	1	25	10	5	0	3	12	832	841	14.6
peptide9632	sp|P63132|PO113_HUMAN	50	75	0.059	24	18	9	0	7	24	467	484	17.3
peptide10733	sp|P63132|PO113_HUMAN	50	92	0.052	24	12	6	0	11	22	731	742	17.7
peptide13465	sp|P63132|PO113_HUMAN	53.846	54	0.18	24	13	6	0	5	17	364	376	16.2
peptide13574	sp|P63132|PO113_HUMAN	53.846	54	0.18	24	13	6	0	5	17	364	376	16.2
peptide13874	sp|P63132|PO113_HUMAN	50	75	0.058	24	18	9	0	7	24	467	484	17.3
peptide18204	sp|P63132|PO113_HUMAN	52.941	71	0.018	24	17	5	1	4	20	943	956	18.9
peptide18300	sp|P63132|PO113_HUMAN	50	58	1.3	24	10	5	0	3	12	593	602	14.2
peptide18303	sp|P63132|PO113_HUMAN	50	58	3.1	24	10	5	0	3	12	593	602	13.5
peptide1650	sp|P63132|PO113_HUMAN	53.846	57	0.15	23	13	6	0	5	17	364	376	16.2
peptide2980	sp|P63132|PO113_HUMAN	52.941	74	0.014	23	17	5	1	4	20	943	956	19.2
peptide5373	sp|P63132|PO113_HUMAN	53.846	57	0.15	23	13	6	0	5	17	364	376	16.2
peptide6356	sp|P63132|PO113_HUMAN	50	52	0.69	23	12	6	0	6	17	679	690	14.6
peptide10621	sp|P63132|PO113_HUMAN	54.545	96	1	23	11	5	0	11	21	16	26	14.2
peptide10897	sp|P63132|PO113_HUMAN	50	70	0.42	23	10	5	0	4	13	54	63	15
peptide15479	sp|P63132|PO113_HUMAN	53.846	52	0.15	23	13	5	1	5	16	936	948	16.2
peptide16316	sp|P63132|PO113_HUMAN	54.545	96	1	23	11	5	0	11	21	16	26	14.2
peptide17669	sp|P63132|PO113_HUMAN	53.333	83	0.058	23	15	7	0	9	23	744	758	17.3
peptide3945	sp|P63132|PO113_HUMAN	50	55	0.58	22	12	6	0	4	15	616	627	14.6
peptide5228	sp|P63132|PO113_HUMAN	50	55	0.53	22	12	6	0	10	21	55	66	15
peptide8682	sp|P63132|PO113_HUMAN	50	64	2.8	22	14	7	0	7	20	459	472	13.1
peptide16962	sp|P63132|PO113_HUMAN	50	55	0.58	22	12	6	0	4	15	616	627	14.6
peptide17603	sp|P63132|PO113_HUMAN	50	55	0.53	22	12	6	0	10	21	55	66	15
peptide4786	sp|P63132|PO113_HUMAN	50	95	0.078	21	16	8	0	6	21	308	323	16.9
peptide6448	sp|P63132|PO113_HUMAN	54.545	52	0.86	21	11	5	0	1	11	97	107	14.2
peptide7102	sp|P63132|PO113_HUMAN	50	100	0.71	21	10	5	0	7	16	843	852	14.6
peptide14816	sp|P63132|PO113_HUMAN	54.545	52	0.94	21	11	5	0	2	12	97	107	14.2
peptide15278	sp|P63132|PO113_HUMAN	50	76	0.019	21	16	8	0	6	21	888	903	18.5
peptide17138	sp|P63132|PO113_HUMAN	54.545	57	0.16	21	11	5	0	2	12	448	458	16.2
peptide18214	sp|P63132|PO113_HUMAN	52.941	81	0.014	21	17	5	1	4	20	943	956	18.9
peptide170	sp|P63132|PO113_HUMAN	50	50	0.61	20	10	5	0	6	15	163	172	14.6
peptide306	sp|P63132|PO113_HUMAN	50	50	0.61	20	10	5	0	6	15	163	172	14.6
peptide2421	sp|P63132|PO113_HUMAN	50	50	0.94	20	10	5	0	4	13	108	117	14.2
peptide2834	sp|P63132|PO113_HUMAN	50	50	1.7	20	10	5	0	3	12	418	427	13.5
peptide3753	sp|P63132|PO113_HUMAN	50	50	0.44	20	10	5	0	7	16	798	807	15
peptide5499	sp|P63132|PO113_HUMAN	54.545	55	1	20	11	5	0	1	11	97	107	14.2
peptide5930	sp|P63132|PO113_HUMAN	50	50	0.6	20	10	5	0	6	15	163	172	14.6
peptide7084	sp|P63132|PO113_HUMAN	50	50	0.6	20	10	5	0	6	15	163	172	14.6
peptide8253	sp|P63132|PO113_HUMAN	63.636	55	0.059	20	11	4	0	1	11	461	471	16.9
peptide11155	sp|P63132|PO113_HUMAN	50	50	0.28	20	10	5	0	1	10	16	25	15.4
peptide14112	sp|P63132|PO113_HUMAN	50	50	0.41	20	10	5	0	5	14	611	620	15
peptide16185	sp|P63132|PO113_HUMAN	50	50	1.5	20	10	5	0	6	15	640	649	13.9
peptide17166	sp|P63132|PO113_HUMAN	54.545	100	0.12	20	11	5	0	10	20	672	682	16.2
peptide17167	sp|P63132|PO113_HUMAN	63.636	55	0.059	20	11	4	0	1	11	461	471	16.9
peptide17335	sp|P63132|PO113_HUMAN	54.545	55	0.017	20	11	5	0	9	19	830	840	18.5
peptide18222	sp|P63132|PO113_HUMAN	52.941	85	0.013	20	17	5	1	4	20	943	956	18.9
peptide18235	sp|P63132|PO113_HUMAN	50	50	0.27	20	10	5	0	6	15	105	114	15.4
peptide19081	sp|Q902F9|EN113_HUMAN	54.545	66	2.2	41	11	5	0	11	21	373	383	14.6
peptide13468	sp|Q902F9|EN113_HUMAN	63.636	59	0.57	32	11	4	0	6	16	368	378	15.4
peptide18160	sp|Q902F9|EN113_HUMAN	60	87	8.1	30	10	4	0	2	11	529	538	12.7
peptide11396	sp|Q902F9|EN113_HUMAN	60	69	0.77	29	10	4	0	11	20	91	100	15
peptide1125	sp|Q902F9|EN113_HUMAN	58.333	85	1.1	27	12	4	1	2	12	135	146	14.6
peptide6894	sp|Q902F9|EN113_HUMAN	50	65	0.45	26	16	7	1	8	23	399	413	15.4
peptide11411	sp|Q902F9|EN113_HUMAN	50	65	0.45	26	16	7	1	8	23	399	413	15.4
peptide13094	sp|Q902F9|EN113_HUMAN	50	58	0.27	26	10	5	0	7	16	374	383	15.8
peptide19715	sp|Q902F9|EN113_HUMAN	54.545	81	0.017	26	11	5	0	10	20	101	111	19.2
peptide2587	sp|Q902F9|EN113_HUMAN	50	52	1.5	23	12	6	0	1	12	382	393	13.9
peptide2845	sp|Q902F9|EN113_HUMAN	64.286	61	0.054	23	14	5	0	10	23	371	384	17.3
peptide7824	sp|Q902F9|EN113_HUMAN	53.846	52	0.15	23	13	5	1	3	14	136	148	16.2
peptide989	sp|Q902F9|EN113_HUMAN	64.286	64	0.05	22	14	5	0	9	22	371	384	17.3
peptide15937	sp|Q902F9|EN113_HUMAN	53.846	50	0.26	22	13	4	1	8	18	127	139	15.4
peptide17938	sp|Q902F9|EN113_HUMAN	50	55	0.062	22	12	6	0	8	19	389	400	17.3
peptide61	sp|Q902F9|EN113_HUMAN	50	57	0.12	21	12	6	0	8	19	577	588	16.2
peptide3089	sp|Q902F9|EN113_HUMAN	50	57	0.79	21	12	6	0	7	18	135	146	14.6
peptide8481	sp|Q902F9|EN113_HUMAN	60	86	1.6	21	10	2	1	14	21	135	144	13.9
peptide11508	sp|Q902F9|EN113_HUMAN	50	81	0.011	21	12	6	0	6	17	93	104	19.2
peptide12132	sp|Q902F9|EN113_HUMAN	72.727	52	0.022	21	11	0	1	11	18	576	586	18.5
peptide16925	sp|Q902F9|EN113_HUMAN	50	67	0.021	21	14	6	1	3	16	355	367	18.5
peptide360	sp|Q902F9|EN113_HUMAN	50	50	4.2	20	10	5	0	7	16	529	538	12.7
peptide1033	sp|Q902F9|EN113_HUMAN	50	50	4.2	20	10	5	0	7	16	529	538	12.7
peptide3667	sp|Q902F9|EN113_HUMAN	50	60	0.36	20	12	6	0	6	17	87	98	15
peptide6363	sp|Q902F9|EN113_HUMAN	50	60	0.36	20	12	6	0	6	17	87	98	15
peptide9770	sp|Q902F9|EN113_HUMAN	50	60	1.2	20	12	6	0	1	12	382	393	13.9
peptide10342	sp|Q902F9|EN113_HUMAN	50	75	0.08	20	16	7	1	3	17	379	394	16.5
peptide10493	sp|Q902F9|EN113_HUMAN	50	50	1.3	20	10	5	0	10	19	520	529	13.9
peptide13099	sp|Q902F9|EN113_HUMAN	50	50	0.19	20	10	5	0	1	10	374	383	15.8
peptide13820	sp|Q902F9|EN113_HUMAN	58.333	55	0.45	20	12	4	1	2	12	135	146	15
peptide14324	sp|Q902F9|EN113_HUMAN	50	60	0.11	20	12	6	0	7	18	577	588	16.2
peptide18235	sp|Q902F9|EN113_HUMAN	50	50	0.67	20	10	5	0	6	15	224	233	14.6

## Sheet: GAG
Peptides	Sequences	SpectrumCount	TheoreticalMH	ProteinCount	ProteinLoci	HERV	% OF IDENTICAL MATCHES	COVER	evalue	Pep sequence length	Alignment length	MISTACHES	GAPS	Start of alignment in query	End of alignment in query	Start of alignment in subjetc	End of alignment in subject	Bitscore	Query	Alignment	Subjetc
peptide5807	KAEPPKAPEQEQAAPGPAAGGEAPK	10	2426.23	1	| nxp:NX_P80723-1	sp|P62684|GA113_HUMAN	54.545	80	1.6	25	11	5	0	5	15	615	625	13.9	PKAPEQEQAAP	P+AP+Q A P	PQAPQQTGAFP
peptide3869	PQGPPQQGGHPPPPQGRPQGPPQQGGHPRPPR	16	3318.69	1	| nxp:NX_P02810-1	sp|P62684|GA113_HUMAN	50	97	0.27	32	16	8	0	16	31	613	628	16.2	GRPQGPPQQGGHPRPP	G+PQ P Q G P P	GQPQAPQQTGAFPIQP
peptide6807	VSKQEEASGGPTAPKAESGR	8	1985.99	1	| nxp:NX_P50552-1	sp|P62684|GA113_HUMAN	50	50	2.2	20	10	5	0	6	15	610	619	13.5	EASGGPTAPK	E G P AP+	EQRGQPQAPQ
peptide12318	TLGAWGSLCNSHWDIEDAHVLCQQLK	3	3038.42	4	| nxp:NX_Q86VB7-3 | nxp:NX_Q86VB7-4 | nxp:NX_Q86VB7-1 | nxp:NX_Q86VB7-2	sp|P62684|GA113_HUMAN	50	69	0.07	26	10	5	0	5	14	591	600	17.3	WGSLCNSHWD	W S C S +D	WASQCRSKFD
peptide11679	HGDTWGSICDSDFSLEAASVLCR	4	2583.12	4	| nxp:NX_Q86VB7-3 | nxp:NX_Q86VB7-4 | nxp:NX_Q86VB7-1 | nxp:NX_Q86VB7-2	sp|P62684|GA113_HUMAN	50	52	0.044	23	12	6	0	2	13	588	599	17.7	GDTWGSICDSDF	G W S C S F	GKHWASQCRSKF
peptide9024	VETGVLKPGMVVTFAPVNVTTEVK	5	2515.38	2	| nxp:NX_P68104-1 | nxp:NX_Q5VTE0-1	sp|P62684|GA113_HUMAN	53.846	54	0.33	24	13	6	0	3	15	531	543	15.4	TGVLKPGMVVTFA	TGV+ G V TF	TGVVLGGQVRTFG
peptide18608	SEDCLCAALSSYVHACAAKG	2	2169.94	1	| nxp:NX_P98088-1	sp|P62684|GA113_HUMAN	50	60	0.052	20	12	6	0	9	20	506	517	17.3	LSSYVHACAAKG	(+)S YV AC G	ISEYVKACDGMG
peptide15072	VSNGAGTMSVSLVADENPFAQGALK	2	2463.22	1	| nxp:NX_P06396-4	sp|P62684|GA113_HUMAN	50	64	0.53	25	18	7	1	10	25	476	493	15	VSLVADEN--PFAQGALK	V L+A EN P Q A+K	VELMAYENANPECQSAIK
peptide15662	LLQDSVDFSLADAINTEFKNTR	2	2497.26	1	| nxp:NX_P08670-1	sp|P62684|GA113_HUMAN	54.545	50	0.45	22	11	5	0	2	12	458	468	15	LQDSVDFSLAD	LQD S+AD	LQDVAQKSIAD
peptide3524	AGYTDKVVIGMDVAASEFFR	18	2176.07	1	| nxp:NX_P06733-1	sp|P62684|GA113_HUMAN	50	60	6.6	20	12	6	0	3	14	451	462	12.3	YTDKVVIGMDVA	Y D V DVA	YPDFVARLQDVA
peptide1573	TPEVTCVVVDVSHEDPEVQFNWYVDGVEVHNAK	42	3797.78	1	| nxp:NX_P01859-1	sp|P62684|GA113_HUMAN	50	85	0.065	33	12	5	1	18	28	364	375	18.1	VQF-NWYVDGVE	+QF W++DGV+	LQFKTWWIDGVQ
peptide5481	SQGPPPPGKPQGPPPQGGSK	10	1894.98	1	| nxp:NX_P02812-1	sp|P62684|GA113_HUMAN	50	85	3.9	20	12	6	0	4	15	290	301	12.7	PPPPGKPQGPPP	PP G +G PP	PPGEGAQEGEPP
peptide9690	TPCTVSCNIPVVSGKECEEIIRK	4	2676.32	1	| nxp:NX_P02675-1	sp|P62684|GA113_HUMAN	50	87	0.4	23	14	7	0	10	23	257	270	15.4	PVVSGKECEEIIRK	P G E EII K	PSRQGSELHEIIDK
peptide16772	TKATCAPQHGAPGPGPADASK	2	2018.97	2	| nxp:NX_P21333-2 | nxp:NX_P21333-1	sp|P62684|GA113_HUMAN	63.636	57	0.44	21	11	4	0	6	16	236	246	15	APQHGAPGPGP	APQ AP P P	APQGRAPYPQP
peptide7402	SVHPYEVAEVIALPVEQGNFPYLQWVR	6	3140.62	2	| nxp:NX_O60888-1 | nxp:NX_O60888-2	sp|P62684|GA113_HUMAN	54.545	100	0.24	27	11	5	0	14	24	235	245	16.2	PVEQGNFPYLQ	P QG PY Q	PAPQGRAPYPQ
peptide18672	KAEGGGGGGRPGAPAAGDGK	2	1666.83	1	| nxp:NX_Q00839-1	sp|P62684|GA113_HUMAN	50	60	0.19	20	12	6	0	9	20	229	240	15.8	GRPGAPAAGDGK	G PG P A G+	GYPGMPPAPQGR
peptide8517	PQGPPPPPQGGRPHRPPQGQPPQ	6	2404.24	1	| nxp:NX_Q04118-1	sp|P62684|GA113_HUMAN	52.381	100	0.64	23	21	8	1	4	22	222	242	14.6	GPPPPPQGGRPH	G PP PQG P+	GMPPAPQGRAPY
peptide5552	SRQPEPEQEPGMSDPLPKPL	10	2248.09	1	| nxp:NX_P07988-1	sp|P62684|GA113_HUMAN	50	50	8.4	20	10	5	0	3	12	221	230	11.9	QPEPEQEPGM	QP PE + G	QPPPESQYGY
peptide1829	REEAPSLRPAPPPISGGGYR	36	2107.1	1	| nxp:NX_P02675-1	sp|P62684|GA113_HUMAN	53.846	65	0.32	20	13	6	0	7	19	218	230	15	LRPAPPPISGGGY	L+ PPP S GY	LQYQPPPESQYGY
peptide11170	APEPHVEEDDDDELDSKLNYKPPPQK	4	3005.4	1	| nxp:NX_P52566-1	sp|P62684|GA113_HUMAN	50	96	0.16	26	10	5	0	16	25	216	225	16.5	SKLNYKPPPQ	++L Y+PPP+	AELQYQPPPE
peptide4229	APVGHFYEPQAPSAEVEMTSYVLLAYLTAQPAPTSEDLTSATNIVK	14	4907.43	1	| nxp:NX_P01023-1	sp|P62684|GA113_HUMAN	50	63	8.4	46	10	5	0	2	11	207	216	13.1	PVGHFYEPQA	PV + Y P A	PVAYQYWPPA
peptide11155	SCVEEPEPEPEAAEGDGDKK	4	2172.92	3	| nxp:NX_P51858-2 | nxp:NX_P51858-1 | nxp:NX_P51858-3	sp|P62684|GA113_HUMAN	50	50	8.4	20	10	5	0	8	17	158	167	11.9	SCVEEPEPEP	(+) VE P+P P	ATVEPPKPIP
peptide2450	TSRPENAIIYNNNEDFQVGQAK	27	2508.21	2	| nxp:NX_P29401-1 | nxp:NX_P29401-2	sp|P62684|GA113_HUMAN	50	55	2.2	22	12	6	0	7	18	86	97	13.5	AIIYNNNEDFQV	AII E FQ	AIIKAALEPFQT
peptide3441	TLVVHEKADDLGKGGNEESTK	18	2227.12	1	| nxp:NX_P00441-1	sp|P62684|GA113_HUMAN	54.545	52	0.6	21	11	5	0	11	21	23	33	14.6	LGKGGNEESTK	L +GG + STK	LKRGGVKVSTK

## Sheet: PRO
Peptides	Sequences	SpectrumCount	TheoreticalMH	ProteinCount	ProteinLoci	HERV	% OF IDENTICAL MATCHES	COVER	evalue	Pep sequence length	Alignment length	MISTACHES	GAPS	Start of alignment in query	End of alignment in query	Start of alignment in subject	End of alignment in subject	Bitscore	Query	Alignment	Subjetc
peptide179	VDSGNDVTDIADDGCPKPPEIAHGYVEHSVR	318	3349.54	2	| nxp:NX_P00738-2 | nxp:NX_P00738-1	sp|P63121|VP113_HUMAN	52.941	55	0.019	31	17	9	0	1	17	25	41	19.2	VDSGNDVTDIADDGCPK	VD+G DV+ IA + PK	VDTGADVSIIALNQWPK
peptide7755	DYELLCLDGTRKPVEEYANCHLAR	6	2922.39	1	| nxp:NX_P02787-1	sp|P63121|VP113_HUMAN	50	50	0.14	24	12	6	0	8	19	135	146	16.5	DGTRKPVEEYAN	DG + PVE N	DGIKVPVEAKIN 146
peptide19203	VVGFHVLGPNAGEVTQGFAAALK	6	1608.91	3	| nxp:NX_P02768-3 | nxp:NX_P02768-2 | nxp:NX_P02768-1	sp|P63121|VP113_HUMAN	50	52	0.092	23	12	6	0	4	15	68	79	16.9	FHVLGPNAGEVT	H LGP+ E T	LHCLGPDNQEST
peptide7825	ELILSDETLPAPEFSPEPESGR	6	2413.18	1	| nxp:NX_P04217-1	sp|P63121|VP113_HUMAN	50	55	0.035	22	12	6	0	8	19	105	116	18.1	TLPAPEFSPEPE	T+PAP +SP +	TMPAPLYSPTSQ
peptide13789	STSESTAALGCLVKDYFPEPV	2	2271.08	1	| nxp:NX_P01859-1	sp|P63121|VP113_HUMAN	50	57	0.95	21	12	6	0	4	15	63	74	14.2	ESTAALGCLVKD	(+)ST L CL D	QSTEILHCLGPD
peptide16127	KSMKGAGTNEDALIEILTTR	2	2164.13	1	| nxp:NX_P12429-1	sp|P63121|VP113_HUMAN	60	50	0.041	20	10	6	0	4	13	128	137	17.7	KGAGTNEDAL	KG G NED +	KGLGKNEDGI

## Sheet: POL
Peptides	Sequences	SpectrumCount	TheoreticalMH	ProteinCount	ProteinLoci	HERV	% OF IDENTICAL MATCHES	COVER	evalue	Pep sequence length	Alignment length	MISTACHES	GAPS	Start of alignment in query	End of alignment in query	Start of alignment in subject	End of alignment in subject	Bitscore	Query	Alignment	Subjetc
peptide418	AQLCEDHCVDGCFCPPGTVLDDITHSGCLPLGQCPCTHGGR	147	4653.96	1	| nxp:NX_Q9HC84-1	sp|P63132|PO113_HUMAN	50	56	0.58	41	10	5	0	26	35	637	646	16.2	SGCLPLGQCP	(+)G P G CP	AGVNPRGLCP
peptide16284	SLPVLDLIDAIQPGSINYDLLKTENLNDDEKLNNAK	2	3996.08	2	| nxp:NX_P13796-2 | nxp:NX_P13796-1	sp|P63132|PO113_HUMAN	52.381	58	0.32	36	21	8	1	12	32	253	271	16.5	QPGSINYDLLKTENLNDDEKL	Q I D LKT LND +KL	QKIEIRKDTLKT--LNDFQKL
peptide14878	KYTLPPGVDPTQVSSSLSPEGTLTVEAPMPK	2	3226.66	1	| nxp:NX_P04792-1	sp|P63132|PO113_HUMAN	60	71	0.46	31	10	4	0	21	30	14	23	15.8	GTLTVEAPMP	G TVE P P	GAATVEPPKP
peptide9554	VTISCTGSSSNIGAGYDVHWYQQLPGTAPK	4	3194.52	1	| nxp:NX_P01703-1	sp|P63132|PO113_HUMAN	54.545	57	5	30	11	5	0	6	16	468	478	13.1	TGSSSNIGAGY	T SSN A Y	TDGSSNGKAAY
peptide11929	LGCGWAMLAPGNARFGQGSGPIVLDDVR	4	2914.45	5	| nxp:NX_Q9UGM3-5 | nxp:NX_Q9UGM3-3 | nxp:NX_Q9UGM3-1 | nxp:NX_Q9UGM3-7 | nxp:NX_Q9UGM3-6	sp|P63132|PO113_HUMAN	50	71	0.41	28	10	5	0	2	11	832	841	15.4	GCGWAMLAPG	G G+A ++PG	GRGFACVSPG
peptide1125	YGPPCPSCPAPEFLGGPSVFLFPPKPK	59	2943.46	1	| nxp:NX_P01861-1	sp|P63132|PO113_HUMAN	57.143	93	0.19	27	14	4	1	13	26	12	23	16.2	FLGGPSVFLFPPKP	FLG +V PPKP	FLGAATV--EPPKP
peptide16278	IQPGSINYDLLKTENLNDDEKLNNAK	2	2959.5	1	| nxp:NX_P13796-2	sp|P63132|PO113_HUMAN	58.824	65	0.22	26	17	5	1	6	22	257	271	16.2	INYDLLKTENLNDDEKL	I D LKT LND +KL	IRKDTLKT--LNDFQKL
peptide9632	DASGATFTWTPSSGKSAVQGPPER	4	2434.16	1	| nxp:NX_P01877-1	sp|P63132|PO113_HUMAN	50	75	0.059	24	18	9	0	7	24	467	484	17.3	FTWTPSSGKSAVQGPPER	FT S+GK+A G ER	FTDGSSNGKAAYTGLKER
peptide10733	FLHVPDTFEGHFDGVPVISKGQQK	4	2682.37	1	| nxp:NX_P19823-1	sp|P63132|PO113_HUMAN	50	92	0.052	24	12	6	0	11	22	731	742	17.7	HFDGVPVISKGQ	H G+P S+GQ	HTTGIPYNSQGQ
peptide18300	ADQELMTYSHDNIICGITSVSFSK	2	2716.26	2	| nxp:NX_P62873-2 | nxp:NX_P62873-1	sp|P63132|PO113_HUMAN	50	58	1.3	24	10	5	0	3	12	593	602	14.2	QELMTYSHDN	QEL +H N	QELHALTHVN
peptide1650	TMQALPYSTVGNSNNYLHLSVLR	40	2578.31	1	| nxp:NX_P01024-1	sp|P63132|PO113_HUMAN	53.846	57	0.15	23	13	6	0	5	17	364	376	16.2	LPYSTVGNSNNYL	LP+STV YL	LPHSTVKTFTLYL
peptide2980	YWCNDGKTPGAVNACHLSCSALL	22	2594.16	1	| nxp:NX_P61626-1	sp|P63132|PO113_HUMAN	52.941	74	0.014	23	17	5	1	4	20	943	956	19.2	NDGKTPGAVNACHLSCS	N GK+P AC SCS	NGGKSP---YACRSSCS
peptide6356	CDPHEATCYDDGKTYHVGEQWQK	8	2824.17	14	| nxp:NX_P02751-12 | nxp:NX_P02751-10 | nxp:NX_P02751-6 | nxp:NX_P02751-5 | nxp:NX_P02751-9 | nxp:NX_P02751-14 | nxp:NX_P02751-13 | nxp:NX_P02751-8 | nxp:NX_P02751-17 | nxp:NX_P02751-3 | nxp:NX_P02751-11 | nxp:NX_P02751-1 | nxp:NX_P02751-7 | nxp:NX_P02751-15	sp|P63132|PO113_HUMAN	50	52	0.69	23	12	6	0	6	17	679	690	14.6	ATCYDDGKTYHV	ATC T HV	ATCQTGESTSHV
peptide10621	RSPEAPQPVIAMEEPAVPAPLPK	4	2424.3	1	| nxp:NX_P14317-1	sp|P63132|PO113_HUMAN	54.545	96	1	23	11	5	0	11	21	16	26	14.2	AMEEPAVPAPL	A EP P PL	ATVEPPKPIPL
peptide10897	KIDNSQVESGSLEDDWDFLPPKK	4	2647.29	1	| nxp:NX_P27797-1	sp|P63132|PO113_HUMAN	50	70	0.42	23	10	5	0	4	13	54	63	15	NSQVESGSLE	N Q+E G +E	NEQLEKGHIE
peptide15479	LVLRCSMDDSAGPRSPTGEWLPR	2	2600.27	1	| nxp:NX_P07988-1	sp|P63132|PO113_HUMAN	53.846	52	0.15	23	13	5	1	5	16	936	948	16.2	CSMDDSA-GPRSP	CS+DD G +SP	CSLDDCINGGKSP
peptide17669	QEDKDDLDVTELTNEDLLDQLVK	2	2688.31	4	| nxp:NX_P42167-3 | nxp:NX_P42167-2 | nxp:NX_P42167-1 | nxp:NX_P42166-1	sp|P63132|PO113_HUMAN	53.333	83	0.058	23	15	7	0	9	23	744	758	17.3	VTELTNEDLLDQLVK	(+) E TN L QLVK	IVERTNRTLKTQLVK
peptide3945	QLPQQDQPVPHGTQCLAMGWGR	16	2504.19	1	| nxp:NX_P24158-1	sp|P63132|PO113_HUMAN	50	55	0.58	22	12	6	0	4	15	616	627	14.6	QQDQPVPHGTQC	Q V H TQC	QAKDIVQHCTQC
peptide5228	MQYAPNTQVEILPQGHESPIFK	11	2543.26	2	| nxp:NX_P40121-2 | nxp:NX_P40121-1	sp|P63132|PO113_HUMAN	50	55	0.53	22	12	6	0	10	21	55	66	15	EILPQGHESPIF	E L +GH P F	EQLEKGHIEPSF
peptide8682	TVDFTSPLFKPATGFPLGSSLR	6	2338.24	11	| nxp:NX_Q99102-12 | nxp:NX_Q99102-2 | nxp:NX_Q99102-13 | nxp:NX_Q99102-8 | nxp:NX_Q99102-7 | nxp:NX_Q99102-5 | nxp:NX_Q99102-16 | nxp:NX_Q99102-3 | nxp:NX_Q99102-17 | nxp:NX_Q99102-10 | nxp:NX_Q99102-1	sp|P63132|PO113_HUMAN	50	64	2.8	22	14	7	0	7	20	459	472	13.1	PLFKPATGFPLGSS	PL T F GSS	PLENALTVFTDGSS
peptide4786	EGFGHLSPTGTTEFWLGNEKI	12	2320.12	2	| nxp:NX_P02679-2 | nxp:NX_P02679-1	sp|P63132|PO113_HUMAN	50	95	0.078	21	16	8	0	6	21	308	323	16.9	LSPTGTTEFWLGNEKI	L+P T E L EKI	LTPETTKEIKLVEEKI
peptide6448	KPQGPPPPGKPQGPPAQGGSK	8	2007.08	1	| nxp:NX_P04280-1	sp|P63132|PO113_HUMAN	54.545	52	0.86	21	11	5	0	1	11	97	107	14.2	KPQGPPPPGKP	(+)P GP PG P	QPMGPLQPGLP
peptide7102	LLIYSNNQRPSGVPDRFSGSK	7	2335.22	2	| nxp:NX_P01700-1 | nxp:NX_P01699-1	sp|P63132|PO113_HUMAN	50	100	0.71	21	10	5	0	7	16	843	852	14.6	NQRPSGVPDR	NQ P +P R	NQLPVWMPTR
peptide15278	LVIIEGDLERTEERAELAESR	2	2428.27	3	| nxp:NX_P06753-3 | nxp:NX_P06753-6 | nxp:NX_P06753-2	sp|P63132|PO113_HUMAN	50	76	0.019	21	16	8	0	6	21	888	903	18.5	GDLERTEERAELAESR	GD+ RT+E A E R	GDVRRTDEVAIHQEGR
peptide17138	GTWIHPEIDNPEYSPDPSIYA	2	2401.1	1	| nxp:NX_P27797-1	sp|P63132|PO113_HUMAN	54.545	57	0.16	21	11	5	0	2	12	448	458	16.2	TWIHPEIDNPE	TWI P+I E	TWILPKITRRE
peptide170	SPVGVQPILNEHTFCAGMSK	335	2172.06	2	| nxp:NX_P00738-2 | nxp:NX_P00738-1	sp|P63132|PO113_HUMAN	50	50	0.61	20	10	5	0	6	15	163	172	14.6	QPILNEHTFC	Q +LN T C	QGMLNSPTIC
peptide2421	AHFSPSNIILDFPAAGSAAR	27	2042.05	2	| nxp:NX_O00391-2 | nxp:NX_O00391-1	sp|P63132|PO113_HUMAN	50	50	0.94	20	10	5	0	4	13	108	117	14.2	SPSNIILDFP	SP+ I D+P	SPAMIPKDWP
peptide2834	VLGAFSDGLAHLDNLKGTFA	23	2046.07	1	| nxp:NX_P68871-1	sp|P63132|PO113_HUMAN	50	50	1.7	20	10	5	0	3	12	418	427	13.5	GAFSDGLAHL	GA+ GLA+	GAWQIGLANF
peptide3753	QSLGHGQHGSGSGQSPSPSR	17	1947.9	1	| nxp:NX_Q86YZ3-1	sp|P63132|PO113_HUMAN	50	50	0.44	20	10	5	0	7	16	798	807	15	QHGSGSGQSP	QH +G SP	QHLTGKKNSP
peptide5930	SPVGVQPILNEHTFCVGMSK	9	2200.09	2	| nxp:NX_P00739-1 | nxp:NX_P00739-2	sp|P63132|PO113_HUMAN	50	50	0.6	20	10	5	0	6	15	163	172	14.6	QPILNEHTFC	Q +LN T C	QGMLNSPTIC
peptide8253	ENFMTVDQDGSGTVEHHELR	6	2301.02	1	| nxp:NX_P28676-1	sp|P63132|PO113_HUMAN	63.636	55	0.059	20	11	4	0	1	11	461	471	16.9	ENFMTVDQDGS	EN +TV DGS	ENALTVFTDGS
peptide14112	VQIHDITGKDCQDIANKGAK	2	2211.12	2	| nxp:NX_P02679-2 | nxp:NX_P02679-1	sp|P63132|PO113_HUMAN	50	50	0.41	20	10	5	0	5	14	611	620	15	DITGKDCQDI	D+T K +DI	DVTWKQAKDI
peptide16185	KIWCFGPDGTGPNILTDITK	2	2233.13	1	| nxp:NX_P13639-1	sp|P63132|PO113_HUMAN	50	50	1.5	20	10	5	0	6	15	640	649	13.9	GPDGTGPNIL	P G PN L	NPRGLCPNAL
peptide17166	CLTQSGINGTYSPFSLETCR	2	2291.04	1	| nxp:NX_P28676-1	sp|P63132|PO113_HUMAN	54.545	100	0.12	20	11	5	0	10	20	672	682	16.2	TYSPFSLETCR	TYS F TC+	TYSHFIWATCQ
peptide17335	EDVRVSQTTWDSGFCAVNPK	2	2296.07	1	| nxp:NX_P31146-1	sp|P63132|PO113_HUMAN	54.545	55	0.017	20	11	5	0	9	19	830	840	18.5	TWDSGFCAVNP	TW GF V+P	TWGRGFACVSP
peptide18235	HGILMGVPVPFPIPEPDGCK	2	2176.09	2	| nxp:NX_P61916-2 | nxp:NX_P61916-1	sp|P63132|PO113_HUMAN	50	50	0.27	20	10	5	0	6	15	105	114	15.4	GVPVPFPIPE	G+P P IP+	GLPSPAMIPK

## Sheet: ENV
Peptides	Sequences	SpectrumCount	TheoreticalMH	ProteinCount	ProteinLoci	HERV	% OF IDENTICAL MATCHES	COVER	evalue	Pep sequence length	Alignment length	MISTACHES	GAPS	Start of alignment in query	End of alignment in query	Start of alignment in subject	End of alignment in subject	Bitscore	Query	Alignment	Subjetc
peptide19081	GHFEEEKQQLSSLITDLQSSISNLSQAKEELEQASQAHGAR	2	4524.22	4	| nxp:NX_Q14980-4 | nxp:NX_Q14980-3 | nxp:NX_Q14980-2 | nxp:NX_Q14980-1	sp|Q902F9|EN113_HUMAN	54.545	66	2.2	41	11	5	0	11	21	373	383	14.6	SSLITDLQSSI	SSL LQS +	SSLTVPLQSCV
peptide13468	HQQTVTIPPKSSLSVPYVIVPLKTGLQEVEVK	2	3514.99	1	| nxp:NX_P01024-1	sp|Q902F9|EN113_HUMAN	63.636	59	0.57	32	11	4	0	6	16	368	378	15.4	TIPPKSSLSVP	TI SSL+VP	TIDLNSSLTVP
peptide18160	TLTGTVIDSGDGVTHVIPVAEGYVIGSCIK	2	3058.58	1	| nxp:NX_P61158-1	sp|Q902F9|EN113_HUMAN	60	87	8.1	30	10	4	0	2	11	529	538	12.7	LTGTVIDSGD	L TVI GD	LRQTVIWMGD
peptide11396	AQGPAASAEEPKPVEAPAANSDQTVTVKE	4	2892.42	2	| nxp:NX_P80723-2 | nxp:NX_P80723-1	sp|Q902F9|EN113_HUMAN	60	69	0.77	29	10	4	0	11	20	91	100	15	PKPVEAPAAN	P P A AAN	PMPAGAAAAN
peptide6894	VGHTVGMDCQECTCEAATWTLTCRPK	8	3068.32	1	| nxp:NX_P98088-1	sp|Q902F9|EN113_HUMAN	50	65	0.45	26	16	7	1	8	23	399	413	15.4	DCQECTCEAATWTLTC	D Q TCE LTC	DSQTITCENCR-LLTC
peptide13094	SEGSSVNLSPPLEQCVPDRGQQYQGR	2	2888.36	1	| nxp:NX_P00734-1	sp|Q902F9|EN113_HUMAN	50	58	0.27	26	10	5	0	7	16	374	383	15.8	NLSPPLEQCV	(+)L+ PL+ CV	SLTVPLQSCV
peptide19715	LLQLPLGFLYVHHTYVPAPPCTDFTR	2	3055.59	2	| nxp:NX_Q96PD5-1 | nxp:NX_Q96PD5-2	sp|Q902F9|EN113_HUMAN	54.545	81	0.017	26	11	5	0	10	20	101	111	19.2	YVHHTYVPAPP	Y + YVP PP	YTYWAYVPFPP
peptide2587	CVLFPYGGCQGNGNKFYSEKECR	25	2770.22	1	| nxp:NX_P02760-1	sp|Q902F9|EN113_HUMAN	50	52	1.5	23	12	6	0	1	12	382	393	13.9	CVLFPYGGCQGN	CV PY GN	CVKPPYMLVVGN
peptide2845	KYQKEEFCGLLSSPTGPLSSCHK	23	2653.27	1	| nxp:NX_Q9Y6R7-1	sp|Q902F9|EN113_HUMAN	64.286	61	0.054	23	14	5	0	10	23	371	384	17.3	LLSSPTGPLSSCHK	L SS T PL SC K	LNSSLTVPLQSCVK
peptide7824	VSPTDCSAVEPEAEKALDLINKR	6	2542.28	1	| nxp:NX_P04196-1	sp|Q902F9|EN113_HUMAN	53.846	52	0.15	23	13	5	1	3	14	136	148	16.2	PTD-CSAVEPEAE	PTD C +PE E	PTDDCCPAKPEEE
peptide15937	YFENGKDVNDWVGPPNDNGVTK	2	2465.14	1	| nxp:NX_P0DTE8-1	sp|Q902F9|EN113_HUMAN	53.846	50	0.26	22	13	4	1	8	18	127	139	15.4	VND--WVGPPNDN	VND WV P D+	VNDSVWVPGPTDD
peptide17938	LLQDHPWLLSQNLVVKPDQLIK	2	2597.48	1	| nxp:NX_P53396-3	sp|Q902F9|EN113_HUMAN	50	55	0.062	22	12	6	0	8	19	389	400	17.3	LLSQNLVVKPDQ	L+ N+V+KPD	LVVGNIVIKPDS
peptide61	QEPERNECFLQHKDDNPNLPR	670	2636.23	2	| nxp:NX_P02768-3 | nxp:NX_P02768-1	sp|Q902F9|EN113_HUMAN	50	57	0.12	21	12	6	0	8	19	577	588	16.2	CFLQHKDDNPNL	C LQ ++DN L	CHLQGREDNLTL
peptide8481	QCTHAGGLPQDWRGPDFCPQK	6	2455.1	1	| nxp:NX_P98088-1	sp|Q902F9|EN113_HUMAN	60	86	1.6	21	10	2	1	14	21	135	144	13.9	GP--DFCPQK	GP D CP K	GPTDDCCPAK
peptide11508	GTWERPGGAAPLGYDFWYQPR	4	2424.15	3	| nxp:NX_Q13228-3 | nxp:NX_Q13228-1 | nxp:NX_Q13228-4	sp|Q902F9|EN113_HUMAN	50	81	0.011	21	12	6	0	6	17	93	104	19.2	PGGAAPLGYDFW	P GAA Y +W	PAGAAAANYTYW
peptide12132	LGAILTPNDGRCHLEDNLYKR	3	2455.25	1	| nxp:NX_P05107-1	sp|Q902F9|EN113_HUMAN	72.727	52	0.022	21	11	0	1	11	18	576	586	18.5	RCHL---EDNL	RCHL EDNL	RCHLQGREDNL
peptide16925	DMNQVLDAYENKKPFYLYTGR	2	2565.24	1	| nxp:NX_P23381-1	sp|Q902F9|EN113_HUMAN	50	67	0.021	21	14	6	1	3	16	355	367	18.5	NQVLDAYENKKPFY	NQ L+ ++KPFY	NQTLET-RDRKPFY
peptide3667	HTFMGVVSLGSPSGEVSHPR	17	2097.02	1	| nxp:NX_P02765-1	sp|Q902F9|EN113_HUMAN	50	60	0.36	20	12	6	0	6	17	87	98	15	VVSLGSPSGEVS	VVSL P+G +	VVSLPMPAGAAA
peptide10342	EQVQSCGPPPELLNGNVKEK	4	2223.11	1	| nxp:NX_P08603-1	sp|Q902F9|EN113_HUMAN	50	75	0.08	20	16	7	1	3	17	379	394	16.5	VQSCGPPPELL-NGNV	(+)QSC PP +L GN+	LQSCVKPPYMLVVGNI
peptide10493	VGEFSGANKEKLEATINELV	4	2148.12	1	| nxp:NX_P10599-2	sp|Q902F9|EN113_HUMAN	50	50	1.3	20	10	5	0	10	19	520	529	13.9	EKLEATINEL	(+)KL IN+L	QKLANQINDL
peptide18235	HGILMGVPVPFPIPEPDGCK	2	2176.09	2	| nxp:NX_P61916-2 | nxp:NX_P61916-1	sp|Q902F9|EN113_HUMAN	50	50	0.67	20	10	5	0	6	15	224	233	14.6	GVPVPFPIPE	G P P IP+	GKPCPKEIPK
