# Supplementary material for: Human endogenous retrovirus K activation in the lower respiratory tract of severe COVID-19 patients associates with early mortality
Source: Research Square preprint supplement (doi:10.21203/rs.3.rs-514541/v1), 2021-05-11
Supplement: Supplementary file 3 [file 29902df17fde9b356986a49d.xlsx]

## Sheet: Samples
PatientID	Sample	Output	PeptideStatistics (%FDR)	ProteinStatistics (%FDR)
ICO1062	NS100	Non-Survivor	7 / 5451 = 0.13%	7 / 1003 = 0.7%
IOC1017	NS50	Non-Survivor	8 / 7508 = 0.11%	11 / 1407 = 0.78%
ICO1045	NS56	Non-Survivor	11 / 6886 = 0.16%	8 / 1409 = 0.57%
ICO1019	NS58	Non-Survivor	12 / 6296 = 0.19%	7 / 1044 = 0.67%
ICO1041	NS59	Non-Survivor	2 / 1377 = 0.15%	4 / 333 = 1.2%
ICO1050	NS74	Non-Survivor	8 / 8130 = 0.1%	4 / 1448 = 0.28%
ICO1052	NS80	Non-Survivor	5 / 2429 = 0.21%	4 / 536 = 0.75%
ICO1053	NS81	Non-Survivor	4 / 4929 = 0.08%	8 / 875 = 0.91%
ICO1063	S101	Survivor	8 / 2662 = 0.3%	5 / 594 = 0.84%
ICO1064	S102	Survivor	6 / 2872 = 0.21%	3 / 559 = 0.54%
ICO1018	S51	Survivor	7 / 3884 = 0.18%	6 / 925 = 0.65%
ICO1044	S57	Survivor	2 / 541 = 0.37%	2 / 248 = 0.81%
ICO1051	S75	Survivor	6 / 5116 = 0.12%	6 / 819 = 0.73%
ICO1058	S97	Survivor	3 / 2576 = 0.12%	5 / 985 = 0.51%
TOTAL			20698*	2249*
*(without reverses/contaminats IDs)

## Sheet: Proteins
ID	Length	UniquePeptides	MolWt	SequenceCount	SpectrumCount	NSAF	Coverage	proteinScore	GName	Description
nxp:NX_Q9Y6X5-1	453	2	51589.9	2	4	3.0594e-06	0.0419	6.2494	ENPP4	Bis(5'-adenosyl)-triphosphatase ENPP4 isoform Iso 1
nxp:NX_Q9Y6R7-1	5405	269	571621	269	3011	0.000193014	0.4028	5890.79	FCGBP	IgGFc-binding protein isoform Iso 1
nxp:NX_Q9Y6K5-1	1087	1	121075	1	4	1.27498e-06	0.0092	6.4768	OAS3	2'-5'-oligoadenylate synthase 3 isoform Iso 1
nxp:NX_Q9Y696-1	253	2	28735.7	4	40	5.47789e-05	0.166	53.7652	CLIC4	Chloride intracellular channel protein 4 isoform Iso 1
nxp:NX_Q9Y624-2	250	2	27172.8	2	4	5.54363e-06	0.08	6.9788	F11R	Junctional adhesion molecule A isoform Iso 2
nxp:NX_Q9Y613-1	1164	1	126454	1	4	1.19064e-06	0.006	5.9964	FHOD1	FH1/FH2 domain-containing protein 1 isoform Iso 1
nxp:NX_Q9Y608-2	400	1	45368.1	2	6	5.19715e-06	0.0325	8.1376	LRRFIP2	Leucine-rich repeat flightless-interacting protein 2 isoform Iso 2
nxp:NX_Q9Y5Z4-2	184	0	20828.3	4	20	3.76605e-05	0.2283	35.3904	HEBP2	Heme-binding protein 2 isoform Iso 2
nxp:NX_Q9Y5Z4-1	205	2	22843.2	6	24	4.05631e-05	0.278	41.9192	HEBP2	Heme-binding protein 2 isoform Iso 1
nxp:NX_Q9Y536-1	164	0	18152.2	4	82	0.000173238	0.1646	129.822	PPIAL4A	Peptidyl-prolyl cis-trans isomerase A-like 4A isoform Iso 1
nxp:NX_Q9Y4G6-1	2542	1	271425	3	10	1.36301e-06	0.0153	14.6206	TLN2	Talin-2 isoform Iso 1
nxp:NX_Q9Y490-1	2541	73	269581	74	401	5.46781e-05	0.3644	651.66	TLN1	Talin-1 isoform Iso 1
nxp:NX_Q9Y394-1	339	2	38256.1	2	4	4.08822e-06	0.1239	7.2514	DHRS7	Dehydrogenase/reductase SDR family member 7 isoform Iso 1
nxp:NX_Q9Y2S6-1	64	2	7043.9	2	6	3.24822e-05	0.375	11.0836	TMA7	Translation machinery-associated protein 7 isoform Iso 1
nxp:NX_Q9Y2J8-1	665	1	75497.3	1	6	3.1261e-06	0.018	11.3418	PADI2	Protein-arginine deiminase type-2 isoform Iso 1
nxp:NX_Q9Y2I7-1	2098	1	236968	1	2	3.30292e-07	0.0062	4.1186	PIKFYVE	1-phosphatidylinositol 3-phosphate 5-kinase isoform Iso 1
nxp:NX_Q9Y2A9-1	372	1	42488.9	1	2	1.86278e-06	0.0403	5.1502	B3GNT3	N-acetyllactosaminide beta-1,3-N-acetylglucosaminyltransferase 3 isoform Iso 1
nxp:NX_Q9Y281-1	166	1	18706.8	14	192	0.000400744	0.3494	308.493	CFL2	Cofilin-2 isoform CFL2b
nxp:NX_Q9Y266-1	331	2	38201.1	2	4	4.18703e-06	0.0634	6.7622	NUDC	Nuclear migration protein nudC isoform Iso 1
nxp:NX_Q9Y265-2	386	0	42082	3	6	5.38565e-06	0.1218	10.0966	RUVBL1	RuvB-like 1 isoform Iso 2
nxp:NX_Q9Y265-1	456	1	50178.3	4	8	6.07854e-06	0.1513	13.0892	RUVBL1	RuvB-like 1 isoform Iso 1
nxp:NX_Q9Y230-1	463	6	51106.5	6	12	8.97996e-06	0.1749	21.4934	RUVBL2	RuvB-like 2 isoform Iso 1
nxp:NX_Q9UQB8-6	522	0	57375.9	10	34	2.25674e-05	0.2203	54.9506	BAIAP2	Brain-specific angiogenesis inhibitor 1-associated protein 2 isoform Iso 6
nxp:NX_Q9UQB8-5	520	1	57390.9	10	36	2.39868e-05	0.2212	57.2544	BAIAP2	Brain-specific angiogenesis inhibitor 1-associated protein 2 isoform Iso 5
nxp:NX_Q9UQB8-4	521	0	57304.9	10	34	2.26108e-05	0.2207	54.9506	BAIAP2	Brain-specific angiogenesis inhibitor 1-associated protein 2 isoform Iso 4
nxp:NX_Q9UQB8-2	534	0	58958.8	10	34	2.20603e-05	0.2154	54.9506	BAIAP2	Brain-specific angiogenesis inhibitor 1-associated protein 2 isoform Iso 2
nxp:NX_Q9UQB8-1	552	0	60811.6	10	34	2.1341e-05	0.2083	54.9506	BAIAP2	Brain-specific angiogenesis inhibitor 1-associated protein 2 isoform Iso 1
nxp:NX_Q9UQ80-1	394	2	43741.2	2	4	3.51753e-06	0.0203	5.2502	PA2G4	Proliferation-associated protein 2G4 isoform Iso 1
nxp:NX_Q9UNZ2-6	259	0	28486.7	2	4	5.35099e-06	0.1042	6.5354	NSFL1C	NSFL1 cofactor p47 isoform Iso 4
nxp:NX_Q9UNZ2-5	372	0	40773.4	2	4	3.72556e-06	0.0726	6.5354	NSFL1C	NSFL1 cofactor p47 isoform Iso 3
nxp:NX_Q9UNZ2-1	370	0	40530.3	2	4	3.74569e-06	0.073	6.5354	NSFL1C	NSFL1 cofactor p47 isoform Iso 1
nxp:NX_Q9UN76-1	642	2	72087.2	2	12	6.4762e-06	0.0514	27.8636	SLC6A14	Sodium- and chloride-dependent neutral and basic amino acid transporter B(0+) isoform Iso 1
nxp:NX_Q9UM07-1	663	7	74013.4	7	14	7.31625e-06	0.1041	17.987	PADI4	Protein-arginine deiminase type-4 isoform Iso 1
nxp:NX_Q9ULZ3-3	135	1	15002.8	2	10	2.56649e-05	0.2222	17.6888	PYCARD	Apoptosis-associated speck-like protein containing a CARD isoform Iso 3
nxp:NX_Q9ULZ3-2	176	0	19938.4	1	8	1.57489e-05	0.0966	14.5752	PYCARD	Apoptosis-associated speck-like protein containing a CARD isoform Iso 2
nxp:NX_Q9ULZ3-1	195	0	21595.3	1	8	1.42144e-05	0.0872	14.5752	PYCARD	Apoptosis-associated speck-like protein containing a CARD isoform Iso 1
nxp:NX_Q9ULV4-3	527	7	58891.8	9	30	1.97235e-05	0.1157	44.515	CORO1C	Coronin-1C isoform Iso 3
nxp:NX_Q9UL46-1	239	10	27366.3	10	28	4.05914e-05	0.41	44.4904	PSME2	Proteasome activator complex subunit 2 isoform Iso 1
nxp:NX_Q9UKR3-1	277	2	30532.5	2	4	5.00327e-06	0.065	5.8038	KLK13	Kallikrein-13 isoform Iso 1
nxp:NX_Q9UK76-2	181	0	19885.7	1	2	3.82847e-06	0.0829	4.4092	JPT1	Jupiter microtubule associated homolog 1 isoform Iso 2
nxp:NX_Q9UK76-1	154	0	15986.9	1	2	4.4997e-06	0.0974	4.4092	JPT1	Jupiter microtubule associated homolog 1 isoform Iso 1
nxp:NX_Q9UK55-1	444	6	50656.2	6	12	9.36423e-06	0.1712	17.0818	SERPINA10	Protein Z-dependent protease inhibitor isoform Iso 1
nxp:NX_Q9UJU6-6	382	0	42996.1	3	8	7.25606e-06	0.0864	13.1734	DBNL	Drebrin-like protein isoform Iso 6
nxp:NX_Q9UJU6-4	336	1	37917.5	6	14	1.44365e-05	0.1964	20.891	DBNL	Drebrin-like protein isoform Iso 4
nxp:NX_Q9UJU6-3	439	0	48993.9	5	12	9.47089e-06	0.1367	17.865	DBNL	Drebrin-like protein isoform Iso 3
nxp:NX_Q9UJU6-2	431	0	48246.6	6	14	1.12545e-05	0.1671	21.1668	DBNL	Drebrin-like protein isoform Iso 2
nxp:NX_Q9UJU6-1	430	1	48159.6	7	20	1.61152e-05	0.1953	30.7858	DBNL	Drebrin-like protein isoform Iso 1
nxp:NX_Q9UII2-1	106	2	12223.3	2	40	0.000130746	0.1415	72.2437	ATP5IF1	ATPase inhibitor, mitochondrial isoform Iso 1
nxp:NX_Q9UHL4-1	492	3	54289.2	3	12	8.45065e-06	0.0874	22.3588	DPP7	Dipeptidyl peptidase 2 isoform Iso 1
nxp:NX_Q9UH65-1	585	2	68936.5	2	4	2.36907e-06	0.0325	6.443	SWAP70	Switch-associated protein 70 isoform Iso 1
nxp:NX_Q9UGM3-9	1133	57	124354	129	5507	0.00168407	0.5243	11712.3	DMBT1	Deleted in malignant brain tumors 1 protein isoform Iso 9
nxp:NX_Q9UGM3-8	1662	1	180840	128	6056	0.00126249	0.4049	12828.5	DMBT1	Deleted in malignant brain tumors 1 protein isoform Iso 8
nxp:NX_Q9UGM3-7	2532	0	273250	137	6254	0.000855792	0.3025	13242.8	DMBT1	Deleted in malignant brain tumors 1 protein isoform Iso 7
nxp:NX_Q9UGM3-6	2542	0	274272	137	6254	0.000852425	0.3013	13242.8	DMBT1	Deleted in malignant brain tumors 1 protein isoform Iso 6
nxp:NX_Q9UGM3-5	2393	5	258237	139	6268	0.000907528	0.3222	13268.5	DMBT1	Deleted in malignant brain tumors 1 protein isoform Iso 5
nxp:NX_Q9UGM3-4	1527	6	166377	127	6006	0.00136276	0.4296	12697.1	DMBT1	Deleted in malignant brain tumors 1 protein isoform Iso 4
nxp:NX_Q9UGM3-3	2403	0	259529	137	6254	0.000901733	0.3188	13242.8	DMBT1	Deleted in malignant brain tumors 1 protein isoform Iso 3
nxp:NX_Q9UGM3-2	1785	0	193829	127	6052	0.00117472	0.377	12822.7	DMBT1	Deleted in malignant brain tumors 1 protein isoform Iso 2
nxp:NX_Q9UGM3-1	2413	0	260551	137	6254	0.000897996	0.3174	13242.8	DMBT1	Deleted in malignant brain tumors 1 protein isoform Iso 1
nxp:NX_Q9UBX7-3	307	0	33719	8	36	4.06292e-05	0.2932	63.709	KLK11	Kallikrein-11 isoform Iso 3
nxp:NX_Q9UBX7-2	282	1	31020.8	9	40	4.91456e-05	0.3617	71.6756	KLK11	Kallikrein-11 isoform Iso 2
nxp:NX_Q9UBW5-3	539	0	59132.3	3	14	8.99939e-06	0.0853	23.4132	BIN2	Bridging integrator 2 isoform Iso 3
nxp:NX_Q9UBW5-2	533	1	57977	4	16	1.04008e-05	0.0863	26.8032	BIN2	Bridging integrator 2 isoform Iso 2
nxp:NX_Q9UBW5-1	565	0	61818.8	3	14	8.58526e-06	0.0814	23.4132	BIN2	Bridging integrator 2 isoform Iso 1
nxp:NX_Q9UBR2-1	303	6	33828.2	6	16	1.82958e-05	0.2904	22.3664	CTSZ	Cathepsin Z isoform Iso 1
nxp:NX_Q9UBI6-1	72	1	7983.2	1	4	1.92487e-05	0.1528	6.1242	GNG12	Guanine nucleotide-binding protein G(I)/G(S)/G(O) subunit gamma-12 isoform Iso 1
nxp:NX_Q9P2E9-3	977	2	108547	7	18	6.3834e-06	0.0798	26.3372	RRBP1	Ribosome-binding protein 1 isoform Iso 2
nxp:NX_Q9P2E9-1	1410	0	152347	5	14	3.44019e-06	0.0397	20.0948	RRBP1	Ribosome-binding protein 1 isoform Iso 1
nxp:NX_Q9P1W8-4	276	0	29929.7	2	14	1.75749e-05	0.0652	18.3092	SIRPG	Signal-regulatory protein gamma isoform Iso 4
nxp:NX_Q9P1W8-3	170	0	18435.8	2	14	2.85334e-05	0.1059	18.3092	SIRPG	Signal-regulatory protein gamma isoform Iso 3
nxp:NX_Q9P1W8-1	387	0	42452.9	2	14	1.2534e-05	0.0465	18.3092	SIRPG	Signal-regulatory protein gamma isoform Iso 1
nxp:NX_Q9P1U1-3	348	0	39654	2	4	3.98249e-06	0.0603	6.7134	ACTR3B	Actin-related protein 3B isoform Iso 3
nxp:NX_Q9P1U1-1	418	0	47559.2	3	10	8.28891e-06	0.0718	16.6306	ACTR3B	Actin-related protein 3B isoform Iso 1
nxp:NX_Q9P1F3-1	81	2	9032.9	2	8	3.42199e-05	0.1605	16.4298	ABRACL	Costars family protein ABRACL isoform Iso 1
nxp:NX_Q9P0V9-3	431	0	50015.5	2	4	3.21556e-06	0.0278	5.0794	SEPTIN10	Septin-10 isoform Iso 3
nxp:NX_Q9P0V9-2	503	0	58081.4	2	4	2.75528e-06	0.0239	5.0794	SEPTIN10	Septin-10 isoform Iso 2
nxp:NX_Q9P0V9-1	454	0	52541.5	2	4	3.05266e-06	0.0264	5.0794	SEPTIN10	Septin-10 isoform Iso 1
nxp:NX_Q9P0M6-1	372	0	40015.4	2	18	1.6765e-05	0.0323	38.0376	MACROH2A2	Core histone macro-H2A.2 isoform Iso 1
nxp:NX_Q9NZT1-1	146	1	15864.8	1	2	4.74626e-06	0.0616	2.7484	CALML5	Calmodulin-like protein 5 isoform Iso 1
nxp:NX_Q9NZP8-1	487	3	53446.3	3	12	8.53741e-06	0.0637	17.9114	C1RL	Complement C1r subcomponent-like protein isoform Iso 1
nxp:NX_Q9NZN3-2	175	0	19553.1	2	4	7.91947e-06	0.0971	6.239	EHD3	EH domain-containing protein 3 isoform Iso 2
nxp:NX_Q9NZN3-1	535	1	60830.7	4	8	5.18096e-06	0.0692	11.3464	EHD3	EH domain-containing protein 3 isoform Iso 1
nxp:NX_Q9NZM1-6	2048	0	233311	2	10	1.69178e-06	0.0073	11.3552	MYOF	Myoferlin isoform Iso 6
nxp:NX_Q9NZM1-5	1577	1	179420	3	12	2.63647e-06	0.014	13.95	MYOF	Myoferlin isoform Iso 5
nxp:NX_Q9NZM1-3	2050	0	233159	2	10	1.69013e-06	0.0073	11.3552	MYOF	Myoferlin isoform Iso 3
nxp:NX_Q9NZM1-2	2019	0	229732	2	10	1.71608e-06	0.0074	11.3552	MYOF	Myoferlin isoform Iso 2
nxp:NX_Q9NZM1-1	2061	0	234543	2	10	1.68111e-06	0.0073	11.3552	MYOF	Myoferlin isoform Iso 1
nxp:NX_Q9NY84-5	207	0	23176.7	1	4	6.6952e-06	0.0676	8.9892	VNN3	Vascular non-inflammatory molecule 3 isoform Iso 4
nxp:NX_Q9NY84-2	274	0	30681.5	1	4	5.05805e-06	0.0511	8.9892	VNN3	Vascular non-inflammatory molecule 3 isoform Iso 1
nxp:NX_Q9NY65-1	449	0	50043.5	19	119	9.18279e-05	0.3318	217.457	TUBA8	Tubulin alpha-8 chain isoform Iso 1
nxp:NX_Q9NY33-4	707	0	79240.1	4	10	4.90066e-06	0.0778	18.1422	DPP3	Dipeptidyl peptidase 3 isoform Iso 4
nxp:NX_Q9NY33-2	317	0	35449.1	2	4	4.37194e-06	0.0789	7.1546	DPP3	Dipeptidyl peptidase 3 isoform Iso 2
nxp:NX_Q9NY33-1	737	0	82519.8	4	10	4.70118e-06	0.0746	18.1422	DPP3	Dipeptidyl peptidase 3 isoform Iso 1
nxp:NX_Q9NUQ9-1	324	6	36706.6	9	24	2.56649e-05	0.2994	38.5826	CYRIB	CYFIP-related Rac1 interactor B isoform Iso 1
nxp:NX_Q9NSC7-1	600	4	68503.5	4	10	5.77461e-06	0.0833	13.1512	ST6GALNAC1	Alpha-N-acetylgalactosaminide alpha-2,6-sialyltransferase 1 isoform Iso 1
nxp:NX_Q9NSB2-1	600	0	64783.5	4	59	3.40702e-05	0.0483	95.0046	KRT84	Keratin, type II cuticular Hb4 isoform Iso 1
nxp:NX_Q9NRL2-2	1524	0	175258	2	2	4.54694e-07	0.0105	2.5509	BAZ1A	Bromodomain adjacent to zinc finger domain protein 1A isoform Iso 2
nxp:NX_Q9NRL2-1	1556	0	178574	2	2	4.45343e-07	0.0103	2.5509	BAZ1A	Bromodomain adjacent to zinc finger domain protein 1A isoform Iso 1
nxp:NX_Q9NR45-1	359	1	40263.4	1	4	3.86046e-06	0.0501	6.6702	NANS	Sialic acid synthase isoform Iso 1
nxp:NX_Q9NQC3-5	392	0	42229.9	4	12	1.06064e-05	0.1378	19.5282	RTN4	Reticulon-4 isoform B2
nxp:NX_Q9NQC3-4	960	0	106276	2	4	1.44365e-06	0.0292	7.8166	RTN4	Reticulon-4 isoform Iso 6
nxp:NX_Q9NQC3-3	199	0	22363.2	2	4	6.96435e-06	0.1407	7.8166	RTN4	Reticulon-4 isoform C
nxp:NX_Q9NQC3-2	373	0	40274.9	4	12	1.11467e-05	0.1448	19.5282	RTN4	Reticulon-4 isoform B
nxp:NX_Q9NQC3-1	1192	0	129833	3	8	2.32535e-06	0.0344	14.1088	RTN4	Reticulon-4 isoform A
nxp:NX_Q9NQ84-2	453	2	49338.3	2	4	3.0594e-06	0.0486	7.271	GPRC5C	G-protein coupled receptor family C group 5 member C isoform Iso 2
nxp:NX_Q9NQ48-3	256	1	29296.5	4	8	1.08274e-05	0.207	14.6742	LZTFL1	Leucine zipper transcription factor-like protein 1 isoform Iso 3
nxp:NX_Q9NQ48-1	299	0	34553.1	3	6	6.95271e-06	0.1271	12.0666	LZTFL1	Leucine zipper transcription factor-like protein 1 isoform Iso 1
nxp:NX_Q9NP55-2	242	2	25223.2	13	86	0.000123128	0.5579	159.792	BPIFA1	BPI fold-containing family A member 1 isoform Iso 2
nxp:NX_Q9NP55-1	256	0	26677.9	11	82	0.000110981	0.5273	153.834	BPIFA1	BPI fold-containing family A member 1 isoform Iso 1
nxp:NX_Q9HDC9-2	289	2	32122.7	6	44	5.27508e-05	0.2353	65.1696	APMAP	Adipocyte plasma membrane-associated protein isoform Iso 2
nxp:NX_Q9HDC9-1	416	3	46432.8	6	46	3.83123e-05	0.1779	71.2524	APMAP	Adipocyte plasma membrane-associated protein isoform Iso 1
nxp:NX_Q9HD89-2	82	7	8662.1	12	218	0.000921121	0.561	395.596	RETN	Resistin isoform Iso 2
nxp:NX_Q9HD89-1	108	11	11393.5	22	475	0.00152386	0.7778	841.589	RETN	Resistin isoform Iso 1
nxp:NX_Q9HC84-1	5762	412	595942	450	12479	0.000750379	0.293	24942.4	MUC5B	Mucin-5B isoform Iso 1
nxp:NX_Q9HC38-3	188	1	21226.5	3	6	1.10578e-05	0.1702	11.6666	GLOD4	Glyoxalase domain-containing protein 4 isoform Iso 3
nxp:NX_Q9HC38-2	298	2	33193.5	7	20	2.32535e-05	0.1946	38.6378	GLOD4	Glyoxalase domain-containing protein 4 isoform Iso 2
nxp:NX_Q9HC38-1	313	0	34753.2	4	12	1.32834e-05	0.1438	22.4262	GLOD4	Glyoxalase domain-containing protein 4 isoform Iso 1
nxp:NX_Q9HC35-1	981	2	108830	2	4	1.41275e-06	0.0265	5.1474	EML4	Echinoderm microtubule-associated protein-like 4 isoform Iso 1
nxp:NX_Q9HB71-2	80	1	8932.8	1	14	6.06334e-05	0.125	31.0744	CACYBP	Calcyclin-binding protein isoform Iso 2
nxp:NX_Q9HB71-1	228	1	26175.6	2	10	1.51963e-05	0.0833	21.5404	CACYBP	Calcyclin-binding protein isoform Iso 1
nxp:NX_Q9HB40-2	296	0	32917.5	1	2	2.34106e-06	0.0473	5.3894	SCPEP1	Retinoid-inducible serine carboxypeptidase isoform Iso 2
nxp:NX_Q9HB40-1	452	1	50779.7	2	4	3.06616e-06	0.0509	7.5536	SCPEP1	Retinoid-inducible serine carboxypeptidase isoform Iso 1
nxp:NX_Q9HAV0-1	340	0	37525	5	60	6.11429e-05	0.1294	85.7906	GNB4	Guanine nucleotide-binding protein subunit beta-4 isoform Iso 1
nxp:NX_Q9HAC8-1	227	2	25904.3	2	16	2.44213e-05	0.0749	24.8086	UBTD1	Ubiquitin domain-containing protein 1 isoform Iso 1
nxp:NX_Q9H977-4	349	0	37434.7	2	4	3.97108e-06	0.0659	5.3674	WDR54	WD repeat-containing protein 54 isoform Iso 2
nxp:NX_Q9H977-3	244	0	26214.2	2	4	5.67994e-06	0.0943	5.3674	WDR54	WD repeat-containing protein 54 isoform Iso 3
nxp:NX_Q9H853-1	241	1	27515.7	3	12	1.72519e-05	0.1162	24.6616	TUBA4B	Putative tubulin-like protein alpha-4B isoform Iso 1
nxp:NX_Q9H7M9-1	311	2	33869	2	4	4.45629e-06	0.0804	6.752	VSIR	V-type immunoglobulin domain-containing suppressor of T-cell activation isoform Iso 1
nxp:NX_Q9H4M9-1	534	9	60570.7	10	42	2.7251e-05	0.2172	67.8626	EHD1	EH domain-containing protein 1 isoform Iso 1
nxp:NX_Q9H4G4-1	154	10	17189.5	10	69	0.00015524	0.6623	104.575	GLIPR2	Golgi-associated plant pathogenesis-related protein 1 isoform Iso 1
nxp:NX_Q9H4E7-1	631	4	73846.3	4	8	4.39273e-06	0.084	11.3356	DEF6	Differentially expressed in FDCP 6 homolog isoform Iso 1
nxp:NX_Q9H4E5-2	192	0	21222.5	2	113	0.000203916	0.0625	196.82	RHOJ	Rho-related GTP-binding protein RhoJ isoform Iso 2
nxp:NX_Q9H4E5-1	214	0	23786.8	2	113	0.000182953	0.0561	196.82	RHOJ	Rho-related GTP-binding protein RhoJ isoform Iso 1
nxp:NX_Q9H4B7-1	451	0	50276.5	11	76	5.83863e-05	0.1397	121.118	TUBB1	Tubulin beta-1 chain isoform Iso 1
nxp:NX_Q9H4A4-1	650	9	72531.4	9	20	1.06608e-05	0.1815	33.3538	RNPEP	Aminopeptidase B isoform Iso 1
nxp:NX_Q9H444-1	224	2	24916.6	2	8	1.23742e-05	0.0804	11.2184	CHMP4B	Charged multivesicular body protein 4b isoform Iso 1
nxp:NX_Q9H3R2-1	512	4	54551.3	4	10	6.76712e-06	0.123	18.3449	MUC13	Mucin-13 isoform Iso 1
nxp:NX_Q9H2G2-2	1204	2	138892	2	4	1.15109e-06	0.015	5.7588	SLK	STE20-like serine/threonine-protein kinase isoform Iso 2
nxp:NX_Q9H299-1	93	13	10413.3	13	153	0.00057001	0.8495	281.376	SH3BGRL3	SH3 domain-binding glutamic acid-rich-like protein 3 isoform Iso 1
nxp:NX_Q9H223-1	541	5	61118.5	7	20	1.28087e-05	0.1516	36.5938	EHD4	EH domain-containing protein 4 isoform Iso 1
nxp:NX_Q9H1E3-1	243	1	27262	1	4	5.70332e-06	0.0617	6.0468	NUCKS1	Nuclear ubiquitous casein and cyclin-dependent kinase substrate 1 isoform Iso 1
nxp:NX_Q9H1C7-1	97	2	10605.8	2	4	1.42877e-05	0.1134	7.8994	CYSTM1	Cysteine-rich and transmembrane domain-containing protein 1 isoform Iso 1
nxp:NX_Q9H0U4-1	201	0	22139.2	4	8	1.37901e-05	0.2637	14.701	RAB1B	Ras-related protein Rab-1B isoform Iso 1
nxp:NX_Q9H0Q0-1	323	0	37270.7	3	6	6.4361e-06	0.0681	9.591	CYRIA	CYFIP-related Rac1 interactor A isoform Iso 1
nxp:NX_Q9H098-2	306	3	34719.6	3	6	6.79366e-06	0.1144	9.6178	FAM107B	Protein FAM107B isoform Iso 2
nxp:NX_Q9H008-1	270	1	29128.9	1	4	5.13299e-06	0.0444	7.1538	LHPP	Phospholysine phosphohistidine inorganic pyrophosphate phosphatase isoform Iso 1
nxp:NX_Q9GZV4-1	153	2	16764.2	5	22	4.98202e-05	0.2549	32.8238	EIF5A2	Eukaryotic translation initiation factor 5A-2 isoform Iso 1
nxp:NX_Q9C075-1	422	0	48083.2	2	4	3.28414e-06	0.0213	6.0986	KRT23	Keratin, type I cytoskeletal 23 isoform Iso 1
nxp:NX_Q9BZQ8-1	928	4	103052	4	10	3.73358e-06	0.0463	14.3564	NIBAN1	Protein Niban 1 isoform Iso 1
nxp:NX_Q9BYX7-1	375	29	41970.8	68	1973	0.00182293	0.4	4197.26	POTEKP	Putative beta-actin-like protein 3 isoform Iso 1
nxp:NX_Q9BYE4-1	73	0	8133.7	2	100	0.000474626	0.3014	152.726	SPRR2G	Small proline-rich protein 2G isoform Iso 1
nxp:NX_Q9BXR6-1	569	0	64359.1	2	21	1.27874e-05	0.0439	34.3181	CFHR5	Complement factor H-related protein 5 isoform Iso 1
nxp:NX_Q9BW30-1	176	14	18955.6	14	129	0.000253952	0.5568	236.917	TPPP3	Tubulin polymerization-promoting protein family member 3 isoform Iso 1
nxp:NX_Q9BVA1-1	445	0	49902.9	34	378	0.00029431	0.4427	657.844	TUBB2B	Tubulin beta-2B chain isoform Iso 1
nxp:NX_Q9BUP0-2	143	0	16117.3	1	16	3.87666e-05	0.0769	27.8814	EFHD1	EF-hand domain-containing protein D1 isoform Iso 2
nxp:NX_Q9BUP0-1	239	0	26892.8	1	10	1.44969e-05	0.046	19.1854	EFHD1	EF-hand domain-containing protein D1 isoform Iso 1
nxp:NX_Q9BUJ2-3	752	0	84429.1	2	4	1.84296e-06	0.0253	5.0538	HNRNPUL1	Heterogeneous nuclear ribonucleoprotein U-like protein 1 isoform Iso 3
nxp:NX_Q9BUJ2-2	804	0	90217.8	2	4	1.72376e-06	0.0236	5.0538	HNRNPUL1	Heterogeneous nuclear ribonucleoprotein U-like protein 1 isoform Iso 2
nxp:NX_Q9BUJ2-1	856	0	95661.3	2	4	1.61905e-06	0.0222	5.0538	HNRNPUL1	Heterogeneous nuclear ribonucleoprotein U-like protein 1 isoform Iso 1
nxp:NX_Q9BUF5-1	446	0	49807	20	157	0.000121966	0.2354	242.808	TUBB6	Tubulin beta-6 chain isoform Iso 1
nxp:NX_Q9BTM1-2	151	0	16081.8	25	1441	0.00330644	0.4768	2598.04	H2AJ	Histone H2A.J isoform Iso 2
nxp:NX_Q9BTM1-1	129	0	13992.9	28	1505	0.00404223	0.5891	2722.16	H2AJ	Histone H2A.J isoform Iso 1
nxp:NX_Q9BT09-1	278	3	30710.6	3	6	7.47791e-06	0.1367	10.021	CNPY3	Protein canopy homolog 3 isoform Iso 1
nxp:NX_Q9BRX5-3	255	0	28738.5	1	2	2.71746e-06	0.0392	4.4938	GINS3	DNA replication complex GINS protein PSF3 isoform Iso 3
nxp:NX_Q9BRX5-1	216	0	24501.2	1	2	3.20812e-06	0.0463	4.4938	GINS3	DNA replication complex GINS protein PSF3 isoform Iso 1
nxp:NX_Q9BRK5-6	348	0	39564.8	2	6	5.97373e-06	0.0718	12.4462	SDF4	45 kDa calcium-binding protein isoform Iso 6
nxp:NX_Q9BRK5-4	202	0	22998.5	2	6	1.02914e-05	0.1238	12.4462	SDF4	45 kDa calcium-binding protein isoform Iso 4
nxp:NX_Q9BRK5-3	254	0	27790.8	2	6	8.18449e-06	0.0984	12.4462	SDF4	45 kDa calcium-binding protein isoform Iso 3
nxp:NX_Q9BRK5-1	362	0	41762.5	2	6	5.74271e-06	0.0691	12.4462	SDF4	45 kDa calcium-binding protein isoform Iso 1
nxp:NX_Q9BRF8-2	172	2	19005.6	4	8	1.61152e-05	0.3023	11.451	CPPED1	Serine/threonine-protein phosphatase CPPED1 isoform Iso 2
nxp:NX_Q9BRF8-1	314	1	35507.9	3	6	6.62057e-06	0.1274	10.2192	CPPED1	Serine/threonine-protein phosphatase CPPED1 isoform Iso 1
nxp:NX_Q9BRA2-1	123	2	13913.8	2	4	1.12675e-05	0.2276	7.6562	TXNDC17	Thioredoxin domain-containing protein 17 isoform Iso 1
nxp:NX_Q9BQE3-1	449	0	49845.5	39	265	0.000204491	0.7439	456.851	TUBA1C	Tubulin alpha-1C chain isoform Iso 1
nxp:NX_Q99880-1	126	0	13925.6	50	2975	0.0081807	0.746	5693.3	H2BC13	Histone H2B type 1-L isoform Iso 1
nxp:NX_Q99879-1	126	31	13962.6	63	3402	0.00935487	0.8333	6322.14	H2BC14	Histone H2B type 1-M isoform Iso 1
nxp:NX_Q99878-1	128	22	13909.8	36	1595	0.00431742	0.6484	2898.66	H2AC14	Histone H2A type 1-J isoform Iso 1
nxp:NX_Q99877-1	126	0	13895.5	54	3309	0.00909914	0.8333	6173.04	H2BC15	Histone H2B type 1-N isoform Iso 1
nxp:NX_Q99832-4	456	0	50302	2	4	3.03927e-06	0.0395	6.8662	CCT7	T-complex protein 1 subunit eta isoform Iso 4
nxp:NX_Q99832-1	543	2	59310.9	4	8	5.10463e-06	0.0773	12.5808	CCT7	T-complex protein 1 subunit eta isoform Iso 1
nxp:NX_Q99829-1	537	2	59003.5	2	8	5.16166e-06	0.0335	11.7858	CPNE1	Copine-1 isoform Iso 1
nxp:NX_Q99828-2	231	0	25998.1	15	127	0.000190487	0.6623	233.77	CIB1	Calcium and integrin-binding protein 1 isoform Iso 2
nxp:NX_Q99828-1	191	5	21671.9	17	137	0.00024852	0.8429	244.773	CIB1	Calcium and integrin-binding protein 1 isoform Iso 1
nxp:NX_Q99729-4	286	0	30664.1	2	8	9.69165e-06	0.0804	15.0722	HNRNPAB	Heterogeneous nuclear ribonucleoprotein A/B isoform Iso 4
nxp:NX_Q99729-3	285	0	30551.1	2	8	9.72566e-06	0.0807	15.0722	HNRNPAB	Heterogeneous nuclear ribonucleoprotein A/B isoform Iso 3
nxp:NX_Q99729-2	332	0	35927.2	2	8	8.34883e-06	0.0693	15.0722	HNRNPAB	Heterogeneous nuclear ribonucleoprotein A/B isoform Iso 2
nxp:NX_Q99729-1	332	0	36184.4	2	8	8.34883e-06	0.0693	15.0722	HNRNPAB	Heterogeneous nuclear ribonucleoprotein A/B isoform Iso 1
nxp:NX_Q99674-4	318	2	33417.7	2	4	4.3582e-06	0.1069	9.876	CGREF1	Cell growth regulator with EF hand domain protein 1 isoform Iso 4
nxp:NX_Q99538-3	372	0	41962.7	2	4	3.72556e-06	0.0538	6.24	LGMN	Legumain isoform Iso 3
nxp:NX_Q99538-2	376	0	42902.1	2	4	3.68592e-06	0.0532	6.24	LGMN	Legumain isoform Iso 2
nxp:NX_Q99538-1	433	0	49361.4	2	4	3.20071e-06	0.0462	6.24	LGMN	Legumain isoform Iso 1
nxp:NX_Q99536-3	325	1	34849.6	9	34	3.62468e-05	0.3415	59.5512	VAT1	Synaptic vesicle membrane protein VAT-1 homolog isoform Iso 3
nxp:NX_Q99536-1	393	7	41875.4	15	66	5.81869e-05	0.3766	122.089	VAT1	Synaptic vesicle membrane protein VAT-1 homolog isoform Iso 1
nxp:NX_Q99525-1	98	0	10984.2	1	6	2.12129e-05	0.0816	10.128	H4C7	Histone H4-like protein type G isoform Iso 1
nxp:NX_Q99497-1	189	15	19860.5	15	62	0.000113659	0.7196	123.307	PARK7	Parkinson disease protein 7 isoform Iso 1
nxp:NX_Q99456-1	494	0	53460.4	2	56	3.92767e-05	0.0182	96.6067	KRT12	Keratin, type I cytoskeletal 12 isoform Iso 1
nxp:NX_Q99439-2	270	0	29463.2	4	24	3.07979e-05	0.1556	42.4638	CNN2	Calponin-2 isoform Iso 2
nxp:NX_Q99439-1	309	4	33657.3	7	40	4.48513e-05	0.2233	65.2439	CNN2	Calponin-2 isoform Iso 1
nxp:NX_Q99417-1	103	2	11941.3	2	4	1.34554e-05	0.1165	7.084	MYCBP	c-Myc-binding protein isoform Iso 1
nxp:NX_Q99102-8	1199	0	122954	2	10	2.88971e-06	0.0183	20.1402	MUC4	Mucin-4 isoform Iso 8
nxp:NX_Q99102-7	1201	0	123327	2	10	2.8849e-06	0.0183	20.1402	MUC4	Mucin-4 isoform Iso 7
nxp:NX_Q99102-5	1215	0	125258	4	14	3.99232e-06	0.0428	27.1304	MUC4	Mucin-4 isoform Iso 5
nxp:NX_Q99102-3	1827	0	194010	19	156	2.95842e-05	0.1554	311.39	MUC4	Mucin-4 isoform Iso 3
nxp:NX_Q99102-2	1157	0	118752	2	10	2.99461e-06	0.019	20.1402	MUC4	Mucin-4 isoform Iso 2
nxp:NX_Q99102-17	1943	0	206458	21	131	2.336e-05	0.1647	246.771	MUC4	Mucin-4 isoform Iso 17
nxp:NX_Q99102-16	1384	0	144740	6	20	5.00689e-06	0.0802	45.5042	MUC4	Mucin-4 isoform Iso 16
nxp:NX_Q99102-13	1176	0	130313	29	235	6.92364e-05	0.3571	458.353	MUC4	Mucin-4 isoform Iso 13
nxp:NX_Q99102-12	1125	11	125031	36	263	8.09985e-05	0.4418	502.367	MUC4	Mucin-4 isoform Iso 12
nxp:NX_Q99102-10	2117	0	225275	28	233	3.81337e-05	0.1842	451.77	MUC4	Mucin-4 isoform Iso 10
nxp:NX_Q99102-1	2169	0	231355	29	235	3.7539e-05	0.1936	458.353	MUC4	Mucin-4 isoform Iso 1
nxp:NX_Q96RM1-1	72	0	7781.5	1	72	0.000346477	0.125	125.921	SPRR2F	Small proline-rich protein 2F isoform Iso 1
nxp:NX_Q96QV6-1	131	0	14206.9	12	1109	0.00293315	0.3969	1789.07	H2AC1	Histone H2A type 1-A isoform Iso 1
nxp:NX_Q96QR1-1	104	11	10075.6	11	135	0.000449753	0.5962	267.386	SCGB3A1	Secretoglobin family 3A member 1 isoform Iso 1
nxp:NX_Q96QK1-1	796	3	91630.9	3	8	3.48218e-06	0.0515	10.7566	VPS35	Vacuolar protein sorting-associated protein 35 isoform Iso 1
nxp:NX_Q96QH2-1	670	6	73905	6	14	7.23981e-06	0.091	20.8918	PRAM1	PML-RARA-regulated adapter molecule 1 isoform Iso 1
nxp:NX_Q96PL1-1	93	3	10136.7	3	6	2.23533e-05	0.4516	8.315	SCGB3A2	Secretoglobin family 3A member 2 isoform Iso 1
nxp:NX_Q96PD5-2	634	0	67939.5	4	8	4.37194e-06	0.1183	14.1114	PGLYRP2	N-acetylmuramoyl-L-alanine amidase isoform Iso 2
nxp:NX_Q96PD5-1	576	1	62159.9	5	10	6.01522e-06	0.1528	16.1754	PGLYRP2	N-acetylmuramoyl-L-alanine amidase isoform Iso 1
nxp:NX_Q96NY7-2	686	4	70935.5	21	80	4.04054e-05	0.3586	163.533	CLIC6	Chloride intracellular channel protein 6 isoform A
nxp:NX_Q96NY7-1	704	0	72949.7	18	72	3.54351e-05	0.3139	154.599	CLIC6	Chloride intracellular channel protein 6 isoform B
nxp:NX_Q96N03-2	149	0	16525.3	2	4	9.30139e-06	0.1611	8.4266	VSTM2L	V-set and transmembrane domain-containing protein 2-like protein isoform Iso 2
nxp:NX_Q96N03-1	204	0	22317.3	2	4	6.79366e-06	0.1176	8.4266	VSTM2L	V-set and transmembrane domain-containing protein 2-like protein isoform Iso 1
nxp:NX_Q96LR9-2	248	0	27028.3	1	4	5.58833e-06	0.0484	6.0974	APOLD1	Apolipoprotein L domain-containing protein 1 isoform Iso 2
nxp:NX_Q96LR9-1	279	0	30509.1	1	4	4.96741e-06	0.043	6.0974	APOLD1	Apolipoprotein L domain-containing protein 1 isoform Iso 1
nxp:NX_Q96KP4-2	391	2	43787.3	8	24	2.12671e-05	0.2916	43.4238	CNDP2	Cytosolic non-specific dipeptidase isoform Iso 2
nxp:NX_Q96KP4-1	475	3	52826.9	9	36	2.62593e-05	0.2695	59.978	CNDP2	Cytosolic non-specific dipeptidase isoform Iso 1
nxp:NX_Q96K17-1	158	1	17242	1	2	4.38578e-06	0.1772	5.4386	BTF3L4	Transcription factor BTF3 homolog 4 isoform Iso 1
nxp:NX_Q96HJ5-2	168	0	17571.5	1	8	1.64989e-05	0.0833	10.7734	MS4A3	Membrane-spanning 4-domains subfamily A member 3 isoform Iso 2
nxp:NX_Q96HJ5-1	214	0	22900.3	1	8	1.29524e-05	0.0654	10.7734	MS4A3	Membrane-spanning 4-domains subfamily A member 3 isoform Iso 1
nxp:NX_Q96HE7-1	468	5	54340	5	10	7.40335e-06	0.1303	18.5262	ERO1A	ERO1-like protein alpha isoform Iso 1
nxp:NX_Q96G03-2	291	1	32685.6	2	4	4.76257e-06	0.11	7.2024	PGM2	Phosphoglucomutase-2 isoform Iso 2
nxp:NX_Q96G03-1	612	3	68222.4	4	10	5.66138e-06	0.0915	17.5976	PGM2	Phosphoglucomutase-2 isoform Iso 1
nxp:NX_Q96FJ2-1	89	0	10325.1	2	6	2.3358e-05	0.2472	9.4918	DYNLL2	Dynein light chain 2, cytoplasmic isoform Iso 1
nxp:NX_Q96E39-1	390	0	42098.2	3	7	6.21881e-06	0.0795	14.0503	RBMXL1	RNA binding motif protein, X-linked-like-1 isoform Iso 1
nxp:NX_Q96DA0-1	208	18	22706.6	18	220	0.000366466	0.524	377.883	ZG16B	Zymogen granule protein 16 homolog B isoform Iso 1
nxp:NX_Q96CX2-1	325	9	35660.7	9	22	2.34538e-05	0.3508	38.5122	KCTD12	BTB/POZ domain-containing protein KCTD12 isoform Iso 1
nxp:NX_Q96C23-1	342	2	37724.1	2	4	4.05236e-06	0.0468	5.867	GALM	Galactose mutarotase isoform Iso 1
nxp:NX_Q96C19-1	240	15	26662.5	16	77	0.000111161	0.5	125.23	EFHD2	EF-hand domain-containing protein D2 isoform Iso 1
nxp:NX_Q96BQ1-1	224	10	24928.8	10	22	3.4029e-05	0.433	32.8288	FAM3D	Protein FAM3D isoform Iso 1
nxp:NX_Q96AE4-2	653	0	68544	3	8	4.24474e-06	0.0444	9.2622	FUBP1	Far upstream element-binding protein 1 isoform Iso 2
nxp:NX_Q96AE4-1	644	1	67500.5	4	9	4.84206e-06	0.0559	11.0412	FUBP1	Far upstream element-binding protein 1 isoform Iso 1
nxp:NX_Q96A08-1	127	0	14140.7	19	2284	0.00623112	0.4409	4380.91	H2BC1	Histone H2B type 1-A isoform Iso 1
nxp:NX_Q969H8-1	173	5	18765.3	5	12	2.40331e-05	0.3006	19.8456	MYDGF	Myeloid-derived growth factor isoform Iso 1
nxp:NX_Q93084-7	1033	0	112688	2	4	1.34163e-06	0.0184	5.6024	ATP2A3	Sarcoplasmic/endoplasmic reticulum calcium ATPase 3 isoform SERCA3F
nxp:NX_Q93084-6	1044	0	114039	2	4	1.3275e-06	0.0182	5.6024	ATP2A3	Sarcoplasmic/endoplasmic reticulum calcium ATPase 3 isoform SERCA3D
nxp:NX_Q93084-5	1052	0	114839	2	4	1.3174e-06	0.0181	5.6024	ATP2A3	Sarcoplasmic/endoplasmic reticulum calcium ATPase 3 isoform SERCA3E
nxp:NX_Q93084-4	998	0	109039	2	4	1.38868e-06	0.019	5.6024	ATP2A3	Sarcoplasmic/endoplasmic reticulum calcium ATPase 3 isoform SERCA3G
nxp:NX_Q93084-3	1029	0	112400	2	4	1.34685e-06	0.0185	5.6024	ATP2A3	Sarcoplasmic/endoplasmic reticulum calcium ATPase 3 isoform SERCA3C
nxp:NX_Q93084-2	999	0	109168	2	4	1.38729e-06	0.019	5.6024	ATP2A3	Sarcoplasmic/endoplasmic reticulum calcium ATPase 3 isoform SERCA3A
nxp:NX_Q93084-1	1043	0	113886	2	4	1.32877e-06	0.0182	5.6024	ATP2A3	Sarcoplasmic/endoplasmic reticulum calcium ATPase 3 isoform SERCA3B
nxp:NX_Q93079-1	126	0	13865.5	55	3319	0.00912663	0.8333	6212.45	H2BC9	Histone H2B type 1-H isoform Iso 1
nxp:NX_Q93077-1	130	0	14078.9	26	1311	0.00349408	0.5846	2246.17	H2AC6	Histone H2A type 1-C isoform Iso 1
nxp:NX_Q93045-2	187	0	21770.4	2	4	7.41126e-06	0.0535	5.3978	STMN2	Stathmin-2 isoform Iso 2
nxp:NX_Q93045-1	179	0	20796.9	2	4	7.74249e-06	0.0559	5.3978	STMN2	Stathmin-2 isoform Iso 1
nxp:NX_Q92985-4	516	0	55581.9	2	4	2.68587e-06	0.0155	7.074	IRF7	Interferon regulatory factor 7 isoform D
nxp:NX_Q92985-3	164	0	18006.9	2	4	8.45065e-06	0.0488	7.074	IRF7	Interferon regulatory factor 7 isoform C
nxp:NX_Q92985-2	474	0	51408.8	2	4	2.92385e-06	0.0169	7.074	IRF7	Interferon regulatory factor 7 isoform B
nxp:NX_Q92985-1	503	0	54225.2	2	4	2.75528e-06	0.0159	7.074	IRF7	Interferon regulatory factor 7 isoform A
nxp:NX_Q92954-6	1361	0	146343	1	1	2.54575e-07	0.0081	2.1815	PRG4	Proteoglycan 4 isoform F
nxp:NX_Q92954-3	1311	0	140984	1	1	2.64284e-07	0.0084	2.1815	PRG4	Proteoglycan 4 isoform C
nxp:NX_Q92954-1	1404	0	150950	1	1	2.46778e-07	0.0078	2.1815	PRG4	Proteoglycan 4 isoform A
nxp:NX_Q92928-1	201	0	21985	3	6	1.03426e-05	0.2239	11.7148	RAB1C	Putative Ras-related protein Rab-1C isoform Iso 1
nxp:NX_Q92896-3	1192	1	135888	9	32	9.30139e-06	0.0872	52.4636	GLG1	Golgi apparatus protein 1 isoform Iso 3
nxp:NX_Q92896-2	1203	0	137114	9	30	8.64031e-06	0.0865	49.92	GLG1	Golgi apparatus protein 1 isoform Iso 2
nxp:NX_Q92882-1	214	3	23753.9	3	6	9.7143e-06	0.215	10.6918	OSTF1	Osteoclast-stimulating factor 1 isoform Iso 1
nxp:NX_Q92878-2	1318	2	154473	2	4	1.05152e-06	0.0159	5.7042	RAD50	DNA repair protein RAD50 isoform Iso 2
nxp:NX_Q92834-6	1152	2	126947	2	4	1.20304e-06	0.0451	5.2512	RPGR	X-linked retinitis pigmentosa GTPase regulator isoform Iso 6
nxp:NX_Q92820-1	318	11	35923.2	11	36	3.92238e-05	0.3679	57.181	GGH	Gamma-glutamyl hydrolase isoform Iso 1
nxp:NX_Q92764-1	455	0	50310.5	1	24	1.82757e-05	0.0154	35.8919	KRT35	Keratin, type I cuticular Ha5 isoform Iso 1
nxp:NX_Q92747-2	345	0	38560	3	10	1.00428e-05	0.0841	14.7182	ARPC1A	Actin-related protein 2/3 complex subunit 1A isoform Iso 2
nxp:NX_Q92747-1	370	0	41524.7	3	10	9.36423e-06	0.0784	14.7182	ARPC1A	Actin-related protein 2/3 complex subunit 1A isoform Iso 1
nxp:NX_Q92743-1	480	11	51236.6	11	97	7.00172e-05	0.2021	153.587	HTRA1	Serine protease HTRA1 isoform Iso 1
nxp:NX_Q92673-1	2214	2	248249	2	4	6.25974e-07	0.0104	5.9002	SORL1	Sortilin-related receptor isoform Iso 1
nxp:NX_Q92598-4	860	0	97380.1	13	30	1.20864e-05	0.2047	46.4388	HSPH1	Heat shock protein 105 kDa isoform Iso 4
nxp:NX_Q92598-3	817	0	92178.3	14	34	1.44189e-05	0.2326	54.1332	HSPH1	Heat shock protein 105 kDa isoform Iso 3
nxp:NX_Q92598-2	814	5	92039.4	17	44	1.87285e-05	0.2838	67.0114	HSPH1	Heat shock protein 105 kDa isoform Beta
nxp:NX_Q92598-1	858	0	96785.6	14	34	1.37298e-05	0.2214	54.1332	HSPH1	Heat shock protein 105 kDa isoform Alpha
nxp:NX_Q92522-1	213	5	22455.5	5	24	3.90396e-05	0.2864	43.8698	H1-10	Histone H1.10 isoform Iso 1
nxp:NX_Q92520-1	227	6	24646.6	6	12	1.83159e-05	0.348	19.4716	FAM3C	Protein FAM3C isoform Iso 1
nxp:NX_Q92485-2	373	1	41645	3	8	7.43113e-06	0.118	16.1082	SMPDL3B	Acid sphingomyelinase-like phosphodiesterase 3b isoform Iso 2
nxp:NX_Q92485-1	455	0	50763.2	3	6	4.56892e-06	0.0967	13.154	SMPDL3B	Acid sphingomyelinase-like phosphodiesterase 3b isoform Iso 1
nxp:NX_Q8WXT5-1	416	0	45845.4	2	8	6.66301e-06	0.0168	8.9886	FOXD4L4	Forkhead box protein D4-like 4 isoform Iso 1
nxp:NX_Q8WXI7-1	14507	73	1.51822e+06	73	470	1.12252e-05	0.0457	795.015	MUC16	Mucin-16 isoform Iso 1
nxp:NX_Q8WWX8-6	519	0	57042.7	1	2	1.33517e-06	0.0867	2.9538	SLC5A11	Sodium/myo-inositol cotransporter 2 isoform Iso 6
nxp:NX_Q8WWX8-5	605	0	66580.7	1	2	1.14538e-06	0.0744	2.9538	SLC5A11	Sodium/myo-inositol cotransporter 2 isoform Iso 5
nxp:NX_Q8WWX8-4	742	0	81393.6	1	2	9.33899e-07	0.0606	2.9538	SLC5A11	Sodium/myo-inositol cotransporter 2 isoform Iso 4
nxp:NX_Q8WWX8-2	640	0	69843.3	1	2	1.08274e-06	0.0703	2.9538	SLC5A11	Sodium/myo-inositol cotransporter 2 isoform Iso 2
nxp:NX_Q8WWX8-1	675	0	73969.7	1	2	1.0266e-06	0.0667	2.9538	SLC5A11	Sodium/myo-inositol cotransporter 2 isoform Iso 1
nxp:NX_Q8WW12-2	130	1	13517.9	2	6	1.59912e-05	0.2385	13.7542	PCNP	PEST proteolytic signal-containing nuclear protein isoform Iso 2
nxp:NX_Q8WW12-1	178	0	18895.4	1	4	7.78599e-06	0.0899	10.462	PCNP	PEST proteolytic signal-containing nuclear protein isoform Iso 1
nxp:NX_Q8WVE0-1	214	0	24471.9	1	4	6.4762e-06	0.028	6.4494	EEF1AKMT1	EEF1A lysine methyltransferase 1 isoform Iso 1
nxp:NX_Q8WUN7-1	234	0	26155.1	1	10	1.48067e-05	0.0299	14.8372	UBTD2	Ubiquitin domain-containing protein 2 isoform Iso 1
nxp:NX_Q8WUM4-3	271	1	30415.7	7	28	3.57983e-05	0.3247	45.8616	PDCD6IP	Programmed cell death 6-interacting protein isoform Iso 3
nxp:NX_Q8WUM4-2	873	0	96693.4	27	110	4.36568e-05	0.3734	188.129	PDCD6IP	Programmed cell death 6-interacting protein isoform Iso 2
nxp:NX_Q8WUM4-1	868	3	95945.1	28	118	4.71017e-05	0.3848	199.834	PDCD6IP	Programmed cell death 6-interacting protein isoform Iso 1
nxp:NX_Q8TF72-1	1996	2	216706	2	36	6.24908e-06	0.005	42.6722	SHROOM3	Protein Shroom3 isoform Iso 1
nxp:NX_Q8TE73-1	4624	2	528666	2	6	4.4958e-07	0.0017	7.7448	DNAH5	Dynein heavy chain 5, axonemal isoform Iso 1
nxp:NX_Q8TE68-4	502	0	55754.7	2	4	2.76077e-06	0.0578	6.4498	EPS8L1	Epidermal growth factor receptor kinase substrate 8-like protein 1 isoform Iso 4
nxp:NX_Q8TE68-3	551	0	61626.7	3	6	3.77289e-06	0.0599	10.4708	EPS8L1	Epidermal growth factor receptor kinase substrate 8-like protein 1 isoform Iso 3
nxp:NX_Q8TE68-2	596	0	66419	2	4	2.32535e-06	0.0487	6.4498	EPS8L1	Epidermal growth factor receptor kinase substrate 8-like protein 1 isoform Iso 2
nxp:NX_Q8TE68-1	723	0	80184	4	8	3.83377e-06	0.0678	12.673	EPS8L1	Epidermal growth factor receptor kinase substrate 8-like protein 1 isoform Iso 1
nxp:NX_Q8TDZ2-4	1086	0	119728	1	4	1.27616e-06	0.0092	5.8604	MICAL1	[F-actin]-monooxygenase MICAL1 isoform Iso 4
nxp:NX_Q8TDZ2-2	981	1	108466	2	6	2.11912e-06	0.0183	8.5128	MICAL1	[F-actin]-monooxygenase MICAL1 isoform Iso 2
nxp:NX_Q8TDL5-2	160	17	17665.5	47	800	0.00173238	0.6312	1602.78	BPIFB1	BPI fold-containing family B member 1 isoform Iso 2
nxp:NX_Q8TDL5-1	484	123	52390.5	164	4346	0.00311113	0.8595	9174.88	BPIFB1	BPI fold-containing family B member 1 isoform Iso 1
nxp:NX_Q8TDB8-5	535	0	58193.4	4	18	1.16572e-05	0.0748	32.4566	SLC2A14	Solute carrier family 2, facilitated glucose transporter member 14 isoform Iso 5
nxp:NX_Q8TDB8-4	411	1	44844.5	5	20	1.68602e-05	0.0973	35.2648	SLC2A14	Solute carrier family 2, facilitated glucose transporter member 14 isoform Iso 4
nxp:NX_Q8TDB8-2	497	0	53962.2	4	18	1.25484e-05	0.0805	32.4566	SLC2A14	Solute carrier family 2, facilitated glucose transporter member 14 isoform Iso 2
nxp:NX_Q8TDB8-1	520	0	56265.5	4	18	1.19934e-05	0.0769	32.4566	SLC2A14	Solute carrier family 2, facilitated glucose transporter member 14 isoform Iso 1
nxp:NX_Q8TD06-1	166	0	19140.9	1	10	2.08721e-05	0.0663	15.4796	AGR3	Anterior gradient protein 3 isoform Iso 1
nxp:NX_Q8TAX7-1	377	3	39116.7	3	18	1.65427e-05	0.1034	27.415	MUC7	Mucin-7 isoform Iso 1
nxp:NX_Q8TAA3-5	250	0	27807.7	2	10	1.38591e-05	0.1	20.0998	PSMA8	Proteasome subunit alpha-type 8 isoform Iso 3
nxp:NX_Q8TAA3-2	212	1	23669.5	3	12	1.96119e-05	0.184	22.5958	PSMA8	Proteasome subunit alpha-type 8 isoform Iso 2
nxp:NX_Q8TAA3-1	256	0	28494.1	2	10	1.35342e-05	0.0977	20.0998	PSMA8	Proteasome subunit alpha-type 8 isoform Iso 1
nxp:NX_Q8NI32-2	207	0	23306.3	1	4	6.6952e-06	0.0966	8.5202	LYPD6B	Ly6/PLAUR domain-containing protein 6B isoform Iso 2
nxp:NX_Q8NI32-1	183	0	20623.8	1	4	7.57326e-06	0.1093	8.5202	LYPD6B	Ly6/PLAUR domain-containing protein 6B isoform Iso 1
nxp:NX_Q8NHW5-1	317	0	34324.7	3	6	6.55792e-06	0.1041	9.7422	RPLP0P6	60S acidic ribosomal protein P0-like isoform Iso 1
nxp:NX_Q8NHM4-1	247	0	26502.2	2	4	5.61096e-06	0.081	6.2268	PRSS3P2	Putative trypsin-6 isoform Iso 1
nxp:NX_Q8NFL0-1	401	2	45939.7	2	4	3.45613e-06	0.0524	5.403	B3GNT7	UDP-GlcNAc:betaGal beta-1,3-N-acetylglucosaminyltransferase 7 isoform Iso 1
nxp:NX_Q8NFI4-1	369	0	41333.3	5	10	9.38961e-06	0.1463	16.154	ST13P5	Putative protein FAM10A5 isoform Iso 1
nxp:NX_Q8NCL4-1	622	3	71095.1	3	10	5.57036e-06	0.0691	15.5518	GALNT6	Polypeptide N-acetylgalactosaminyltransferase 6 isoform Iso 1
nxp:NX_Q8NC51-4	387	2	42383.3	5	31	2.77539e-05	0.1214	57.749	SERBP1	Plasminogen activator inhibitor 1 RNA-binding protein isoform Iso 4
nxp:NX_Q8NC51-3	393	0	43091.5	4	27	2.38037e-05	0.1043	53.4548	SERBP1	Plasminogen activator inhibitor 1 RNA-binding protein isoform Iso 3
nxp:NX_Q8NC51-2	402	0	44212.2	4	27	2.32708e-05	0.102	53.4548	SERBP1	Plasminogen activator inhibitor 1 RNA-binding protein isoform Iso 2
nxp:NX_Q8NC51-1	408	0	44920.4	4	27	2.29286e-05	0.1005	53.4548	SERBP1	Plasminogen activator inhibitor 1 RNA-binding protein isoform Iso 1
nxp:NX_Q8NBS9-1	432	4	47580.7	4	12	9.62435e-06	0.1042	20.971	TXNDC5	Thioredoxin domain-containing protein 5 isoform Iso 1
nxp:NX_Q8NBQ5-1	300	1	32896.7	1	2	2.30984e-06	0.05	6.1982	HSD17B11	Estradiol 17-beta-dehydrogenase 11 isoform Iso 1
nxp:NX_Q8NBJ4-1	401	23	45287.8	23	94	8.1219e-05	0.4165	160.122	GOLM1	Golgi membrane protein 1 isoform Iso 1
nxp:NX_Q8N6Q3-3	145	3	15654.8	7	44	0.000105138	0.3793	89.1621	CD177	CD177 antigen isoform Iso 3
nxp:NX_Q8N6Q3-2	248	1	27025.4	12	100	0.000139708	0.4879	184.157	CD177	CD177 antigen isoform Iso 2
nxp:NX_Q8N6Q3-1	437	8	46314.5	19	185	0.000146678	0.476	315.195	CD177	CD177 antigen isoform Iso 1
nxp:NX_Q8N6C8-3	456	3	49137.7	5	14	1.06374e-05	0.1338	22.8258	LILRA3	Leukocyte immunoglobulin-like receptor subfamily A member 3 isoform Iso 3
nxp:NX_Q8N6C8-2	375	0	40313.4	3	8	7.3915e-06	0.112	14.7386	LILRA3	Leukocyte immunoglobulin-like receptor subfamily A member 3 isoform Iso 2
nxp:NX_Q8N5I2-1	433	2	45934.7	2	4	3.20071e-06	0.0508	5.4122	ARRDC1	Arrestin domain-containing protein 1 isoform Iso 1
nxp:NX_Q8N4F0-1	458	47	49123.7	47	433	0.000327564	0.5262	894.534	BPIFB2	BPI fold-containing family B member 2 isoform Iso 1
nxp:NX_Q8N423-3	510	0	55405.4	2	4	2.71746e-06	0.0745	5.2906	LILRB2	Leukocyte immunoglobulin-like receptor subfamily B member 2 isoform Iso 3
nxp:NX_Q8N423-2	597	0	64909	2	4	2.32145e-06	0.0637	5.2906	LILRB2	Leukocyte immunoglobulin-like receptor subfamily B member 2 isoform Iso 2
nxp:NX_Q8N423-1	598	0	64980	2	4	2.31757e-06	0.0635	5.2906	LILRB2	Leukocyte immunoglobulin-like receptor subfamily B member 2 isoform Iso 1
nxp:NX_Q8N339-1	61	0	6087.2	2	8	4.54396e-05	0.2131	14.6724	MT1M	Metallothionein-1M isoform Iso 1
nxp:NX_Q8N257-1	126	0	13881.5	39	2594	0.00713302	0.6429	5192.65	H2BU1	Histone H2B type 3-B isoform Iso 1
nxp:NX_Q8N1N4-2	410	0	44971.5	3	14	1.18309e-05	0.0659	20.21	KRT78	Keratin, type II cytoskeletal 78 isoform Iso 2
nxp:NX_Q8N1N4-1	520	0	56812.5	5	46	3.06499e-05	0.075	75.0268	KRT78	Keratin, type II cytoskeletal 78 isoform Iso 1
nxp:NX_Q8N1A0-1	295	0	34118.7	1	49	5.75504e-05	0.0305	71.525	KRT222	Keratin-like protein KRT222 isoform Iso 1
nxp:NX_Q8N0Y7-1	254	0	28740.8	8	58	7.91167e-05	0.248	117.243	PGAM4	Probable phosphoglycerate mutase 4 isoform Iso 1
nxp:NX_Q8IZP2-1	240	0	27371.7	2	6	8.66192e-06	0.1125	14.4568	ST13P4	Putative protein FAM10A4 isoform Iso 1
nxp:NX_Q8IWL2-2	263	2	27700.3	47	815	0.00107368	0.5057	1794.84	SFTPA1	Pulmonary surfactant-associated protein A1 isoform Iso 2
nxp:NX_Q8IWL1-1	248	17	26147.6	51	870	0.00121546	0.5363	1883.3	SFTPA2	Pulmonary surfactant-associated protein A2 isoform Iso 1
nxp:NX_Q8IUE6-1	130	2	13968.8	22	1169	0.00311562	0.5846	1954.13	H2AC21	Histone H2A type 2-B isoform Iso 1
nxp:NX_Q86YZ3-1	2850	14	282210	14	74	8.99624e-06	0.0723	139.192	HRNR	Hornerin isoform Iso 1
nxp:NX_Q86Y46-2	381	0	41940.6	1	29	2.63722e-05	0.0236	48.593	KRT73	Keratin, type II cytoskeletal 73 isoform Iso 2
nxp:NX_Q86Y46-1	540	0	58868.7	3	57	3.65725e-05	0.0333	90.9765	KRT73	Keratin, type II cytoskeletal 73 isoform Iso 1
nxp:NX_Q86VP6-2	1062	0	117796	6	14	4.56749e-06	0.0631	20.6316	CAND1	Cullin-associated NEDD8-dissociated protein 1 isoform Iso 2
nxp:NX_Q86VP6-1	1230	0	136271	6	14	3.94364e-06	0.0545	20.6316	CAND1	Cullin-associated NEDD8-dissociated protein 1 isoform Iso 1
nxp:NX_Q86VB7-4	1154	0	124859	24	105	3.15252e-05	0.2782	183.385	CD163	Scavenger receptor cysteine-rich type 1 protein M130 isoform Iso 4
nxp:NX_Q86VB7-3	1121	5	121512	26	125	3.86348e-05	0.2935	208.265	CD163	Scavenger receptor cysteine-rich type 1 protein M130 isoform Iso 3
nxp:NX_Q86VB7-2	1161	0	125883	25	114	3.4021e-05	0.2834	194.402	CD163	Scavenger receptor cysteine-rich type 1 protein M130 isoform Iso 2
nxp:NX_Q86VB7-1	1156	0	125351	25	114	3.41681e-05	0.2846	194.402	CD163	Scavenger receptor cysteine-rich type 1 protein M130 isoform Iso 1
nxp:NX_Q86V81-1	257	3	26853.6	3	22	2.96595e-05	0.1868	41.9362	ALYREF	THO complex subunit 4 isoform Iso 1
nxp:NX_Q86UX7-2	663	0	75364.7	8	30	1.56777e-05	0.1629	40.8502	FERMT3	Fermitin family homolog 3 isoform Iso 2
nxp:NX_Q86UX7-1	667	0	75887	8	30	1.55837e-05	0.1619	40.8502	FERMT3	Fermitin family homolog 3 isoform Iso 1
nxp:NX_Q86UQ4-7	2292	0	258137	2	4	6.04671e-07	0.0109	5.7732	ABCA13	ATP-binding cassette sub-family A member 13 isoform Iso 7
nxp:NX_Q86UQ4-6	2217	0	249613	2	4	6.25127e-07	0.0113	5.7732	ABCA13	ATP-binding cassette sub-family A member 13 isoform Iso 6
nxp:NX_Q86UQ4-4	5059	0	575860	4	8	5.47897e-07	0.0095	11.7366	ABCA13	ATP-binding cassette sub-family A member 13 isoform Iso 4
nxp:NX_Q86UQ4-1	5058	1	575773	5	10	6.85007e-07	0.0113	13.5896	ABCA13	ATP-binding cassette sub-family A member 13 isoform Iso 1
nxp:NX_Q86SQ4-4	1222	0	136772	2	4	1.13413e-06	0.0237	5.1672	ADGRG6	Adhesion G-protein coupled receptor G6 isoform Iso 4
nxp:NX_Q86SQ4-3	1250	0	139793	2	4	1.10873e-06	0.0232	5.1672	ADGRG6	Adhesion G-protein coupled receptor G6 isoform Iso 3
nxp:NX_Q86SQ4-2	1193	0	133567	2	4	1.1617e-06	0.0243	5.1672	ADGRG6	Adhesion G-protein coupled receptor G6 isoform Iso 2
nxp:NX_Q86SQ4-1	1221	0	136589	2	4	1.13506e-06	0.0238	5.1672	ADGRG6	Adhesion G-protein coupled receptor G6 isoform Iso 1
nxp:NX_Q7Z794-1	578	3	61845.5	7	214	0.00012828	0.1263	382.104	KRT77	Keratin, type II cytoskeletal 1b isoform Iso 1
nxp:NX_Q7Z5R6-1	666	4	73118.8	4	10	5.20235e-06	0.0691	16.7752	APBB1IP	Amyloid beta A4 precursor protein-binding family B member 1-interacting protein isoform Iso 1
nxp:NX_Q7Z5L0-1	202	6	21502.3	6	18	3.08742e-05	0.4455	36.754	VMO1	Vitelline membrane outer layer protein 1 homolog isoform Iso 1
nxp:NX_Q7Z406-6	2003	0	228508	16	98	1.69519e-05	0.0664	166.054	MYH14	Myosin-14 isoform Iso 6
nxp:NX_Q7Z406-5	1478	2	167775	12	65	1.52375e-05	0.0697	106.68	MYH14	Myosin-14 isoform Iso 5
nxp:NX_Q7Z406-4	1779	0	202853	13	65	1.26593e-05	0.0641	107.05	MYH14	Myosin-14 isoform Iso 4
nxp:NX_Q7Z406-2	2036	0	231852	16	98	1.66772e-05	0.0653	166.054	MYH14	Myosin-14 isoform Iso 2
nxp:NX_Q7Z406-1	1995	0	227714	16	98	1.70199e-05	0.0667	166.054	MYH14	Myosin-14 isoform Iso 1
nxp:NX_Q7Z404-3	294	0	32298.3	1	4	4.71397e-06	0.0408	6.016	TMC4	Transmembrane channel-like protein 4 isoform Iso 3
nxp:NX_Q7Z404-2	712	0	79139.1	13	44	2.14115e-05	0.1826	83.3818	TMC4	Transmembrane channel-like protein 4 isoform Iso 1
nxp:NX_Q7Z404-1	706	4	78596.9	16	56	2.74826e-05	0.2125	102.856	TMC4	Transmembrane channel-like protein 4 isoform Iso 2
nxp:NX_Q7Z3Z0-1	450	1	49269.4	3	141	0.000108563	0.04	200.881	KRT25	Keratin, type I cytoskeletal 25 isoform Iso 1
nxp:NX_Q7Z3Y9-1	468	0	51860.4	2	103	7.62545e-05	0.0192	153.421	KRT26	Keratin, type I cytoskeletal 26 isoform Iso 1
nxp:NX_Q7Z3Y8-1	459	0	49773.5	5	192	0.000144931	0.0654	281.783	KRT27	Keratin, type I cytoskeletal 27 isoform Iso 1
nxp:NX_Q7Z3Y7-1	464	0	50517.9	5	223	0.000166518	0.056	312.928	KRT28	Keratin, type I cytoskeletal 28 isoform Iso 1
nxp:NX_Q7RTV2-1	222	0	25687.6	5	12	1.87285e-05	0.1757	17.313	GSTA5	Glutathione S-transferase A5 isoform Iso 1
nxp:NX_Q7RTS7-1	529	0	57811.6	3	57	3.7333e-05	0.034	90.9765	KRT74	Keratin, type II cytoskeletal 74 isoform Iso 1
nxp:NX_Q7L7L0-1	130	0	14094.9	23	1077	0.00287043	0.5231	2001.16	H2AW	Histone H2A type 3 isoform Iso 1
nxp:NX_Q7L5N7-1	544	2	60151.4	2	4	2.54762e-06	0.0349	5.1908	LPCAT2	Lysophosphatidylcholine acyltransferase 2 isoform Iso 1
nxp:NX_Q76I76-1	1423	1	158098	1	4	9.73933e-07	0.0148	6.14	SSH2	Protein phosphatase Slingshot homolog 2 isoform Iso 1
nxp:NX_Q71UI9-4	102	0	10974.1	4	54	0.000183429	0.3039	101.017	H2AZ2	Histone H2A.V isoform Iso 4
nxp:NX_Q71UI9-3	90	3	9351.3	7	60	0.000230984	0.4444	112.203	H2AZ2	Histone H2A.V isoform Iso 3
nxp:NX_Q71UI9-2	114	0	12120.6	4	470	0.00142846	0.2281	780.991	H2AZ2	Histone H2A.V isoform Iso 2
nxp:NX_Q71UI9-1	128	0	13482.5	5	479	0.00129658	0.3125	805.676	H2AZ2	Histone H2A.V isoform Iso 1
nxp:NX_Q71U36-1	451	0	50085.6	45	291	0.000223558	0.796	510.732	TUBA1A	Tubulin alpha-1A chain isoform Iso 1
nxp:NX_Q71DI3-1	136	21	15360.5	50	1473	0.00375265	0.75	2500.96	H3C13	Histone H3.2 isoform Iso 1
nxp:NX_Q70J99-3	1142	0	128720	2	4	1.21358e-06	0.0096	7.957	UNC13D	Protein unc-13 homolog D isoform Iso 3
nxp:NX_Q70J99-2	363	0	41598.5	2	4	3.81792e-06	0.0303	7.957	UNC13D	Protein unc-13 homolog D isoform Iso 2
nxp:NX_Q70J99-1	1090	0	123187	2	4	1.27147e-06	0.0101	7.957	UNC13D	Protein unc-13 homolog D isoform Iso 1
nxp:NX_Q6ZMR3-1	332	0	36466.2	5	132	0.000137756	0.0723	221.318	LDHAL6A	L-lactate dehydrogenase A-like 6A isoform Iso 1
nxp:NX_Q6YHK3-4	1428	0	159577	2	4	9.70523e-07	0.0217	8.837	CD109	CD109 antigen isoform Iso 4
nxp:NX_Q6YHK3-2	1368	0	152548	2	4	1.01309e-06	0.0227	8.837	CD109	CD109 antigen isoform Iso 2
nxp:NX_Q6YHK3-1	1445	0	161569	2	4	9.59105e-07	0.0215	8.837	CD109	CD109 antigen isoform Iso 1
nxp:NX_Q6VB84-1	417	0	45773.4	2	8	6.64703e-06	0.0168	8.9886	FOXD4L3	Forkhead box protein D4-like 3 isoform Iso 1
nxp:NX_Q6UXY8-3	760	1	87744.7	7	26	1.18531e-05	0.0987	38.5998	TMC5	Transmembrane channel-like protein 5 isoform Iso 3
nxp:NX_Q6UXY8-2	948	1	107974	19	81	2.9604e-05	0.2373	148.721	TMC5	Transmembrane channel-like protein 5 isoform Iso 2
nxp:NX_Q6UXY8-1	1006	0	114706	18	79	2.72084e-05	0.1998	145.228	TMC5	Transmembrane channel-like protein 5 isoform Iso 1
nxp:NX_Q6UXB2-1	119	15	13792.2	15	254	0.000739538	0.4118	525.18	CXCL17	C-X-C motif chemokine 17 isoform Iso 1
nxp:NX_Q6UX73-2	361	2	40568.4	3	10	9.59769e-06	0.097	18.029	C16orf89	UPF0764 protein C16orf89 isoform Iso 2
nxp:NX_Q6UX73-1	402	0	45344	1	6	5.17129e-06	0.0323	12.7846	C16orf89	UPF0764 protein C16orf89 isoform Iso 1
nxp:NX_Q6UX71-2	480	1	53859.8	2	4	2.88731e-06	0.0521	7.6502	PLXDC2	Plexin domain-containing protein 2 isoform Iso 2
nxp:NX_Q6UX71-1	529	0	59527.5	1	2	1.30993e-06	0.0321	5.5304	PLXDC2	Plexin domain-containing protein 2 isoform Iso 1
nxp:NX_Q6UX06-1	510	21	57225.8	21	112	7.6089e-05	0.4431	192.305	OLFM4	Olfactomedin-4 isoform Iso 1
nxp:NX_Q6S8J3-1	1075	0	121268	92	3123	0.00100655	0.1656	6324.04	POTEE	POTE ankyrin domain family member E isoform Iso 1
nxp:NX_Q6PI73-1	481	0	52347.9	1	2	1.44065e-06	0.0395	5.0534	LILRA6	Leukocyte immunoglobulin-like receptor subfamily A member 6 isoform Iso 1
nxp:NX_Q6PEY2-1	450	0	49808.6	27	172	0.000132431	0.5022	312.861	TUBA3E	Tubulin alpha-3E chain isoform Iso 1
nxp:NX_Q6P5S2-1	330	52	37883.5	52	602	0.000632057	0.6697	1085.94	LEG1	Protein LEG1 homolog isoform Iso 1
nxp:NX_Q6P4A8-1	553	12	63196.2	12	57	3.57128e-05	0.2007	94.9922	PLBD1	Phospholipase B-like 1 isoform Iso 1
nxp:NX_Q6P3S1-5	426	0	48211.4	1	4	3.2533e-06	0.0164	6.5716	DENND1B	DENN domain-containing protein 1B isoform Iso 1
nxp:NX_Q6P3S1-4	396	0	44853.8	1	4	3.49976e-06	0.0177	6.5716	DENND1B	DENN domain-containing protein 1B isoform Iso 4
nxp:NX_Q6P3S1-2	406	0	45975.3	1	4	3.41356e-06	0.0172	6.5716	DENND1B	DENN domain-containing protein 1B isoform Iso 2
nxp:NX_Q6P3S1-1	775	0	86479.3	1	4	1.78827e-06	0.009	6.5716	DENND1B	DENN domain-containing protein 1B isoform Iso 5
nxp:NX_Q6NXT2-1	135	15	15186.3	30	838	0.00215072	0.4074	1229.55	H3-5	Histone H3.3C isoform Iso 1
nxp:NX_Q6MZM0-1	1159	1	131500	2	10	2.98944e-06	0.0224	25.8608	HEPHL1	Ferroxidase HEPHL1 isoform Iso 1
nxp:NX_Q6JBY9-1	416	9	44459	9	45	3.74794e-05	0.2668	80.3989	RCSD1	CapZ-interacting protein isoform Iso 1
nxp:NX_Q6IS14-1	154	0	16744.3	3	10	2.24985e-05	0.2013	20.4902	EIF5AL1	Eukaryotic translation initiation factor 5A-1-like isoform Iso 1
nxp:NX_Q6IBS0-1	349	3	39505.3	3	6	5.95662e-06	0.0888	7.7564	TWF2	Twinfilin-2 isoform Iso 1
nxp:NX_Q6FI13-1	130	0	14068.9	28	1505	0.00401113	0.5846	2722.16	H2AC18	Histone H2A type 2-A isoform Iso 1
nxp:NX_Q6EEV6-1	95	0	10660.4	1	31	0.000113061	0.1263	48.9574	SUMO4	Small ubiquitin-related modifier 4 isoform Iso 1
nxp:NX_Q6DRA6-1	164	0	17988.5	8	576	0.00121689	0.1829	773.532	H2BC19P	Putative histone H2B type 2-D isoform Iso 1
nxp:NX_Q6DN03-1	193	0	21440.2	8	576	0.00103404	0.1554	773.532	H2BC20P	Putative histone H2B type 2-C isoform Iso 1
nxp:NX_Q687X5-2	283	1	31272.5	6	14	1.71402e-05	0.3322	22.5116	STEAP4	Metalloreductase STEAP4 isoform Iso 2
nxp:NX_Q687X5-1	459	3	51929.5	8	16	1.20776e-05	0.2397	28.505	STEAP4	Metalloreductase STEAP4 isoform Iso 1
nxp:NX_Q66K66-1	360	1	39431.2	1	16	1.5399e-05	0.025	17.3656	TMEM198	Transmembrane protein 198 isoform Iso 1
nxp:NX_Q5XKE5-1	535	1	57782.2	10	130	8.41906e-05	0.1794	241.625	KRT79	Keratin, type II cytoskeletal 79 isoform Iso 1
nxp:NX_Q5VV16-1	416	0	45733.3	2	8	6.66301e-06	0.0168	8.9886	FOXD4L5	Forkhead box protein D4-like 5 isoform Iso 1
nxp:NX_Q5VTE0-1	462	0	50135.1	26	228	0.000170988	0.5195	397.647	EEF1A1P5	Putative elongation factor 1-alpha-like 3 isoform Iso 1
nxp:NX_Q5VSP4-1	162	0	17889	3	12	2.56649e-05	0.1667	21.4792	LCN1P1	Putative lipocalin 1-like protein 1 isoform Iso 1
nxp:NX_Q5TZA2-2	1313	0	148150	3	6	1.58329e-06	0.0244	8.9074	CROCC	Rootletin isoform Iso 2
nxp:NX_Q5TZA2-1	2017	0	228370	3	6	1.03067e-06	0.0159	8.9074	CROCC	Rootletin isoform Iso 1
nxp:NX_Q5TFQ8-1	398	0	43314.3	8	32	2.78574e-05	0.2211	51.6948	SIRPB1	Signal-regulatory protein beta-1 isoform 3 isoform Iso 3
nxp:NX_Q5TEC6-1	136	1	15402.5	25	1178	0.0030011	0.625	1926.03	H3-2	Histone HIST2H3PS2 isoform Iso 1
nxp:NX_Q5T749-1	579	3	64075.2	3	6	3.59043e-06	0.0518	9.964	KPRP	Keratinocyte proline-rich protein isoform Iso 1
nxp:NX_Q5T700-1	205	3	21800.9	3	6	1.01408e-05	0.1805	7.8248	LDLRAD1	Low-density lipoprotein receptor class A domain-containing protein 1 isoform Iso 1
nxp:NX_Q5QNW6-2	134	0	14814.1	55	3319	0.00858176	0.7836	6212.45	H2BC18	Histone H2B type 2-F isoform Iso 2
nxp:NX_Q5JXB2-1	153	0	17348.1	3	6	1.35873e-05	0.1961	8.1486	UBE2NL	Putative ubiquitin-conjugating enzyme E2 N-like isoform Iso 1
nxp:NX_Q5JWF2-2	1023	0	109540	2	4	1.35475e-06	0.0342	5.4216	GNAS	Guanine nucleotide-binding protein G(s) subunit alpha isoforms XLas isoform XLas-2
nxp:NX_Q5JWF2-1	1037	0	110938	2	4	1.33646e-06	0.0338	5.4216	GNAS	Guanine nucleotide-binding protein G(s) subunit alpha isoforms XLas isoform XLas-1
nxp:NX_Q5EG05-2	97	0	10712.5	1	2	7.14385e-06	0.1031	4.0188	CARD16	Caspase recruitment domain-containing protein 16 isoform Iso 2
nxp:NX_Q5EG05-1	197	0	22592.7	1	2	3.51753e-06	0.0508	4.0188	CARD16	Caspase recruitment domain-containing protein 16 isoform Iso 1
nxp:NX_Q58FG1-1	418	1	47664.1	6	30	2.48667e-05	0.134	57.5978	HSP90AA4P	Putative heat shock protein HSP 90-alpha A4 isoform Iso 1
nxp:NX_Q58FG0-1	334	1	38695.8	5	37	3.83821e-05	0.1198	60.0892	HSP90AA5P	Putative heat shock protein HSP 90-alpha A5 isoform Iso 1
nxp:NX_Q58FF8-1	381	4	44303.1	16	146	0.000132771	0.2441	243.574	HSP90AB2P	Putative heat shock protein HSP 90-beta 2 isoform Iso 1
nxp:NX_Q58FF7-1	597	4	68263.9	23	177	0.000102724	0.2379	318.211	HSP90AB3P	Putative heat shock protein HSP 90-beta-3 isoform Iso 1
nxp:NX_Q58FF6-1	505	0	58209.6	12	89	6.10622e-05	0.1069	162.851	HSP90AB4P	Putative heat shock protein HSP 90-beta 4 isoform Iso 1
nxp:NX_Q58FF3-1	399	0	45811.9	5	14	1.21571e-05	0.0702	27.9964	HSP90B2P	Putative endoplasmin-like protein isoform Iso 1
nxp:NX_Q562R1-1	376	11	41958	60	2074	0.00191115	0.5931	3557.61	ACTBL2	Beta-actin-like protein 2 isoform Iso 1
nxp:NX_Q53GD3-4	668	1	74437.2	8	52	2.69712e-05	0.1048	92.9076	SLC44A4	Choline transporter-like protein 4 isoform Iso 4
nxp:NX_Q53GD3-1	710	5	79183.4	11	90	4.39196e-05	0.1366	171.367	SLC44A4	Choline transporter-like protein 4 isoform Iso 1
nxp:NX_Q3ZCM7-1	444	0	49725.9	16	234	0.000182603	0.1712	372.701	TUBB8	Tubulin beta-8 chain isoform Iso 1
nxp:NX_Q3SYB3-1	417	0	45740.4	2	8	6.64703e-06	0.0168	8.9886	FOXD4L6	Forkhead box protein D4-like 6 isoform Iso 1
nxp:NX_Q3SY84-1	523	0	57238	1	29	1.92119e-05	0.0172	48.593	KRT71	Keratin, type II cytoskeletal 71 isoform Iso 1
nxp:NX_Q3LXA3-2	534	0	54739.9	2	4	2.59533e-06	0.073	6.9796	TKFC	Triokinase/FMN cyclase isoform Iso 2
nxp:NX_Q3LXA3-1	575	0	58892	2	4	2.41027e-06	0.0678	6.9796	TKFC	Triokinase/FMN cyclase isoform Iso 1
nxp:NX_Q32MZ4-3	752	4	82620.6	17	87	4.00844e-05	0.2088	147.555	LRRFIP1	Leucine-rich repeat flightless-interacting protein 1 isoform Iso 3
nxp:NX_Q32MZ4-2	784	0	86333.3	14	75	3.31451e-05	0.1862	128.271	LRRFIP1	Leucine-rich repeat flightless-interacting protein 1 isoform Iso 2
nxp:NX_Q32MZ4-1	808	0	89180.7	14	75	3.21606e-05	0.1807	128.271	LRRFIP1	Leucine-rich repeat flightless-interacting protein 1 isoform Iso 1
nxp:NX_Q2VPA4-3	444	0	49093	2	4	3.12141e-06	0.0563	7.1484	CR1L	Complement component receptor 1-like protein isoform Iso 3
nxp:NX_Q2VPA4-1	569	0	62654.6	2	4	2.43569e-06	0.0439	7.1484	CR1L	Complement component receptor 1-like protein isoform Iso 1
nxp:NX_Q2NKX8-1	1250	1	140997	1	4	1.10873e-06	0.0144	6.6716	ERCC6L	DNA excision repair protein ERCC-6-like isoform Iso 1
nxp:NX_Q2M2I5-1	525	0	55035.4	2	86	5.67562e-05	0.0343	120.347	KRT24	Keratin, type I cytoskeletal 24 isoform Iso 1
nxp:NX_Q2M2H8-1	2515	0	277798	1	4	5.51056e-07	0.004	6.537	MGAM2	Probable maltase-glucoamylase 2 isoform Iso 1
nxp:NX_Q16881-6	614	0	67205.9	8	30	1.69288e-05	0.1287	52.0954	TXNRD1	Thioredoxin reductase 1, cytoplasmic isoform Iso 6
nxp:NX_Q16881-4	551	0	60363.8	8	30	1.88644e-05	0.1434	52.0954	TXNRD1	Thioredoxin reductase 1, cytoplasmic isoform Iso 4
nxp:NX_Q16881-3	598	0	65508.7	8	30	1.73818e-05	0.1321	52.0954	TXNRD1	Thioredoxin reductase 1, cytoplasmic isoform Iso 3
nxp:NX_Q16881-2	543	3	59731.7	10	36	2.29708e-05	0.2063	59.9566	TXNRD1	Thioredoxin reductase 1, cytoplasmic isoform Iso 2
nxp:NX_Q16881-1	649	0	70844.2	8	30	1.60159e-05	0.1217	52.0954	TXNRD1	Thioredoxin reductase 1, cytoplasmic isoform Iso 1
nxp:NX_Q16851-1	508	14	56886.7	14	56	3.81943e-05	0.2736	83.0396	UGP2	UTP--glucose-1-phosphate uridylyltransferase isoform Iso 1
nxp:NX_Q16836-2	390	0	42094.8	3	6	5.33041e-06	0.1282	9.0844	HADH	Hydroxyacyl-coenzyme A dehydrogenase, mitochondrial isoform Iso 2
nxp:NX_Q16836-1	314	0	34253.9	3	6	6.62057e-06	0.1592	9.0844	HADH	Hydroxyacyl-coenzyme A dehydrogenase, mitochondrial isoform Iso 1
nxp:NX_Q16778-1	126	5	13893.6	51	3304	0.00908539	0.8333	6181.34	H2BC21	Histone H2B type 2-E isoform Iso 1
nxp:NX_Q16777-1	129	0	13961.8	28	1505	0.00404223	0.5891	2722.16	H2AC20	Histone H2A type 2-C isoform Iso 1
nxp:NX_Q16775-1	308	1	33766.3	1	2	2.24985e-06	0.039	4.12	HAGH	Hydroxyacylglutathione hydrolase, mitochondrial isoform Iso 1
nxp:NX_Q16772-1	222	3	25267.5	7	24	3.74569e-05	0.2477	38.8906	GSTA3	Glutathione S-transferase A3 isoform Iso 1
nxp:NX_Q16769-2	312	0	35381.1	2	4	4.44201e-06	0.0353	7.5516	QPCT	Glutaminyl-peptide cyclotransferase isoform Iso 2
nxp:NX_Q16769-1	361	0	40832.8	2	4	3.83908e-06	0.0305	7.5516	QPCT	Glutaminyl-peptide cyclotransferase isoform Iso 1
nxp:NX_Q16695-1	136	0	15480.5	31	1268	0.00323039	0.5662	2101.48	H3-4	Histone H3.1t isoform Iso 1
nxp:NX_Q16666-3	673	0	75869.6	2	6	3.08894e-06	0.0312	7.9142	IFI16	Gamma-interferon-inducible protein 16 isoform Iso 3
nxp:NX_Q16666-2	729	0	82025.5	2	6	2.85166e-06	0.0288	7.9142	IFI16	Gamma-interferon-inducible protein 16 isoform Iso 2
nxp:NX_Q16666-1	785	0	88181.4	2	6	2.64823e-06	0.0268	7.9142	IFI16	Gamma-interferon-inducible protein 16 isoform Iso 1
nxp:NX_Q16663-1	113	2	12222.1	2	6	1.8397e-05	0.3186	9.2616	CCL15	C-C motif chemokine 15 isoform Iso 1
nxp:NX_Q16651-2	289	3	30481.5	8	60	7.19329e-05	0.3149	128.116	PRSS8	Prostasin isoform Iso 2
nxp:NX_Q16651-1	343	2	36390.2	8	61	6.16183e-05	0.2478	130.364	PRSS8	Prostasin isoform Iso 1
nxp:NX_Q16629-4	226	0	25978.3	2	4	6.13233e-06	0.0929	5.0142	SRSF7	Serine/arginine-rich splicing factor 7 isoform Iso 4
nxp:NX_Q16629-3	132	0	15229.5	2	4	1.04993e-05	0.1591	5.0142	SRSF7	Serine/arginine-rich splicing factor 7 isoform Iso 3
nxp:NX_Q16629-2	135	0	15545.7	2	4	1.0266e-05	0.1556	5.0142	SRSF7	Serine/arginine-rich splicing factor 7 isoform Iso 2
nxp:NX_Q16629-1	238	0	27332	2	4	5.82314e-06	0.0882	5.0142	SRSF7	Serine/arginine-rich splicing factor 7 isoform Iso 1
nxp:NX_Q16610-4	567	0	63504.7	4	11	6.72177e-06	0.0847	17.5624	ECM1	Extracellular matrix protein 1 isoform Iso 4
nxp:NX_Q16610-1	540	1	60617.3	4	12	7.69948e-06	0.0889	18.8123	ECM1	Extracellular matrix protein 1 isoform Iso 1
nxp:NX_Q16553-1	131	2	13479.8	2	6	1.58692e-05	0.374	9.8252	LY6E	Lymphocyte antigen 6E isoform Iso 1
nxp:NX_Q16531-1	1140	4	126869	4	8	2.43141e-06	0.0518	13.9212	DDB1	DNA damage-binding protein 1 isoform Iso 1
nxp:NX_Q16378-2	65	4	7233.6	4	34	0.000181234	0.2462	57.6664	PRR4	Proline-rich protein 4 isoform Iso 2
nxp:NX_Q16378-1	134	48	15069.6	48	1947	0.00503425	0.5821	4016.59	PRR4	Proline-rich protein 4 isoform Iso 1
nxp:NX_Q16352-1	499	0	55339.4	1	12	8.3321e-06	0.024	27.965	INA	Alpha-internexin isoform Iso 1
nxp:NX_Q16348-2	698	1	78457.5	5	10	4.96385e-06	0.0731	19.0926	SLC15A2	Solute carrier family 15 member 2 isoform Iso 2
nxp:NX_Q16348-1	729	0	81712.4	4	8	3.80221e-06	0.0466	15.9472	SLC15A2	Solute carrier family 15 member 2 isoform Iso 1
nxp:NX_Q16270-2	279	2	28823.3	16	143	0.000177585	0.6595	235.338	IGFBP7	Insulin-like growth factor-binding protein 7 isoform Iso 2
nxp:NX_Q16270-1	282	0	29093.4	15	139	0.000170781	0.5532	229.086	IGFBP7	Insulin-like growth factor-binding protein 7 isoform Iso 1
nxp:NX_Q16181-2	436	1	50530.9	3	3	2.38401e-06	0.0528	4.0944	SEPTIN7	Septin-7 isoform Iso 2
nxp:NX_Q16181-1	437	0	50630	2	2	1.58571e-06	0.0503	2.8656	SEPTIN7	Septin-7 isoform Iso 1
nxp:NX_Q15942-1	572	16	61220.2	16	113	6.84473e-05	0.2517	210.407	ZYX	Zyxin isoform Iso 1
nxp:NX_Q15907-2	179	0	19941.2	5	16	3.097e-05	0.2961	25.1908	RAB11B	Ras-related protein Rab-11B isoform Iso 2
nxp:NX_Q15907-1	218	0	24455.5	5	16	2.54295e-05	0.2431	25.1908	RAB11B	Ras-related protein Rab-11B isoform Iso 1
nxp:NX_Q15843-1	81	2	9047.9	2	8	3.42199e-05	0.284	14.399	NEDD8	NEDD8 isoform Iso 1
nxp:NX_Q15833-3	604	0	67634.2	9	20	1.14727e-05	0.1805	32.7682	STXBP2	Syntaxin-binding protein 2 isoform Iso 3
nxp:NX_Q15833-2	590	1	66078.3	10	22	1.29195e-05	0.1847	35.0032	STXBP2	Syntaxin-binding protein 2 isoform Iso 2
nxp:NX_Q15833-1	593	0	66392.5	9	20	1.16856e-05	0.1838	32.7682	STXBP2	Syntaxin-binding protein 2 isoform Iso 1
nxp:NX_Q15828-1	149	3	16482.3	3	6	1.39521e-05	0.2483	10.2326	CST6	Cystatin-M isoform Iso 1
nxp:NX_Q15772-5	3267	0	354053	2	4	4.24214e-07	0.0037	5.1018	SPEG	Striated muscle preferentially expressed protein kinase isoform Iso 4
nxp:NX_Q15772-1	3223	0	348670	2	4	4.30005e-07	0.0037	5.1018	SPEG	Striated muscle preferentially expressed protein kinase isoform Iso 1
nxp:NX_Q15651-2	77	2	8354.5	7	67	0.00030148	0.2857	151.06	HMGN3	High mobility group nucleosome-binding domain-containing protein 3 isoform Iso 2
nxp:NX_Q15651-1	99	0	10641.5	6	61	0.000213486	0.1313	141.528	HMGN3	High mobility group nucleosome-binding domain-containing protein 3 isoform Iso 1
nxp:NX_Q15631-1	228	1	26148.8	1	4	6.07854e-06	0.0658	8.1262	TSN	Translin isoform Iso 1
nxp:NX_Q15599-3	226	0	24684.5	3	12	1.8397e-05	0.146	16.415	SLC9A3R2	Na(+)/H(+) exchange regulatory cofactor NHE-RF2 isoform Iso 3
nxp:NX_Q15599-2	326	0	36113.4	4	14	1.48794e-05	0.1442	19.7524	SLC9A3R2	Na(+)/H(+) exchange regulatory cofactor NHE-RF2 isoform Iso 2
nxp:NX_Q15599-1	337	0	37373	4	14	1.43937e-05	0.1395	19.7524	SLC9A3R2	Na(+)/H(+) exchange regulatory cofactor NHE-RF2 isoform Iso 1
nxp:NX_Q15582-1	683	2	74616	2	4	2.02915e-06	0.019	6.5548	TGFBI	Transforming growth factor-beta-induced protein ig-h3 isoform Iso 1
nxp:NX_Q15459-2	728	0	81608.8	2	4	1.90372e-06	0.0316	5.66	SF3A1	Splicing factor 3A subunit 1 isoform Iso 2
nxp:NX_Q15459-1	793	0	88812.5	2	4	1.74768e-06	0.029	5.66	SF3A1	Splicing factor 3A subunit 1 isoform Iso 1
nxp:NX_Q15366-8	322	0	33886.5	1	7	7.5321e-06	0.0342	9.0239	PCBP2	Poly(rC)-binding protein 2 isoform Iso 8
nxp:NX_Q15366-7	318	0	33457.3	1	7	7.62684e-06	0.0346	9.0239	PCBP2	Poly(rC)-binding protein 2 isoform Iso 7
nxp:NX_Q15366-6	361	0	38108.4	1	7	6.71838e-06	0.0305	9.0239	PCBP2	Poly(rC)-binding protein 2 isoform Iso 6
nxp:NX_Q15366-5	335	0	35306.2	1	7	7.23981e-06	0.0328	9.0239	PCBP2	Poly(rC)-binding protein 2 isoform Iso 5
nxp:NX_Q15366-4	331	0	34876.9	1	7	7.3273e-06	0.0332	9.0239	PCBP2	Poly(rC)-binding protein 2 isoform Iso 4
nxp:NX_Q15366-3	362	0	38179.4	1	7	6.69982e-06	0.0304	9.0239	PCBP2	Poly(rC)-binding protein 2 isoform Iso 3
nxp:NX_Q15366-2	366	0	38608.6	1	7	6.6266e-06	0.0301	9.0239	PCBP2	Poly(rC)-binding protein 2 isoform Iso 2
nxp:NX_Q15366-1	365	0	38537.6	1	7	6.64476e-06	0.0301	9.0239	PCBP2	Poly(rC)-binding protein 2 isoform Iso 1
nxp:NX_Q15365-1	356	8	37455.9	8	54	5.25554e-05	0.2753	80.7322	PCBP1	Poly(rC)-binding protein 1 isoform Iso 1
nxp:NX_Q15323-1	416	0	47189	1	24	1.9989e-05	0.0168	35.8919	KRT31	Keratin, type I cuticular Ha1 isoform Iso 1
nxp:NX_Q15233-1	471	8	54179.3	8	34	2.50111e-05	0.087	61.8268	NONO	Non-POU domain-containing octamer-binding protein isoform Iso 1
nxp:NX_Q15185-4	139	0	16447.6	2	8	1.99411e-05	0.2302	15.8462	PTGES3	Prostaglandin E synthase 3 isoform Iso 4
nxp:NX_Q15185-3	130	0	14930.9	2	8	2.13216e-05	0.2462	15.8462	PTGES3	Prostaglandin E synthase 3 isoform Iso 3
nxp:NX_Q15185-1	160	0	18667.4	2	8	1.73238e-05	0.2	15.8462	PTGES3	Prostaglandin E synthase 3 isoform Iso 1
nxp:NX_Q15149-9	4533	0	514443	18	48	3.66885e-06	0.0371	74.4446	PLEC	Plectin isoform Iso 9
nxp:NX_Q15149-8	4525	0	513375	18	48	3.67533e-06	0.0371	74.4446	PLEC	Plectin isoform Iso 8
nxp:NX_Q15149-7	4515	7	512274	24	62	4.75782e-06	0.0545	92.3048	PLEC	Plectin isoform Iso 7
nxp:NX_Q15149-6	4551	0	516146	18	48	3.65433e-06	0.0369	74.4446	PLEC	Plectin isoform Iso 6
nxp:NX_Q15149-5	4547	0	515944	18	48	3.65755e-06	0.0369	74.4446	PLEC	Plectin isoform Iso 5
nxp:NX_Q15149-4	4547	0	515866	18	48	3.65755e-06	0.0369	74.4446	PLEC	Plectin isoform Iso 4
nxp:NX_Q15149-3	4570	0	517698	18	48	3.63914e-06	0.0368	74.4446	PLEC	Plectin isoform Iso 3
nxp:NX_Q15149-2	4574	0	518139	18	48	3.63596e-06	0.0367	74.4446	PLEC	Plectin isoform Iso 2
nxp:NX_Q15149-1	4684	0	531448	18	48	3.55057e-06	0.0359	74.4446	PLEC	Plectin isoform Iso 1
nxp:NX_Q15113-1	449	1	47924	1	4	3.08665e-06	0.0468	6.5238	PCOLCE	Procollagen C-endopeptidase enhancer 1 isoform Iso 1
nxp:NX_Q15084-5	488	0	53209.8	9	32	2.27198e-05	0.2951	64.4466	PDIA6	Protein disulfide-isomerase A6 isoform Iso 5
nxp:NX_Q15084-3	437	0	47790.1	9	32	2.53713e-05	0.3295	64.4466	PDIA6	Protein disulfide-isomerase A6 isoform Iso 3
nxp:NX_Q15084-2	492	0	53849.1	9	32	2.25351e-05	0.2927	64.4466	PDIA6	Protein disulfide-isomerase A6 isoform Iso 2
nxp:NX_Q15084-1	440	0	48073.3	9	32	2.51983e-05	0.3273	64.4466	PDIA6	Protein disulfide-isomerase A6 isoform Iso 1
nxp:NX_Q15080-3	348	0	38974.1	2	6	5.97373e-06	0.0517	8.4506	NCF4	Neutrophil cytosol factor 4 isoform Iso 3
nxp:NX_Q15080-1	339	0	38989.3	2	6	6.13233e-06	0.0531	8.4506	NCF4	Neutrophil cytosol factor 4 isoform Iso 1
nxp:NX_Q15057-1	778	2	87955.2	2	4	1.78137e-06	0.0321	5.0312	ACAP2	Arf-GAP with coiled-coil, ANK repeat and PH domain-containing protein 2 isoform Iso 1
nxp:NX_Q14CN4-3	469	0	51073.8	4	37	2.7334e-05	0.064	62.6414	KRT72	Keratin, type II cytoskeletal 72 isoform Iso 3
nxp:NX_Q14CN4-2	510	0	55696.4	4	37	2.51365e-05	0.0588	62.6414	KRT72	Keratin, type II cytoskeletal 72 isoform Iso 2
nxp:NX_Q14CN4-1	511	0	55824.4	4	37	2.50873e-05	0.0587	62.6414	KRT72	Keratin, type II cytoskeletal 72 isoform Iso 1
nxp:NX_Q14980-5	979	0	109194	3	6	2.12345e-06	0.0439	9.7098	NUMA1	Nuclear mitotic apparatus protein 1 isoform Iso 5
nxp:NX_Q14980-4	1763	1	199958	10	22	4.32359e-06	0.0902	37.0858	NUMA1	Nuclear mitotic apparatus protein 1 isoform Iso 4
nxp:NX_Q14980-3	1776	0	201313	9	20	3.90176e-06	0.0839	34.6396	NUMA1	Nuclear mitotic apparatus protein 1 isoform Iso 3
nxp:NX_Q14980-2	2101	0	236354	9	20	3.29821e-06	0.0709	34.6396	NUMA1	Nuclear mitotic apparatus protein 1 isoform Iso 2
nxp:NX_Q14980-1	2115	0	238097	9	20	3.27637e-06	0.0704	34.6396	NUMA1	Nuclear mitotic apparatus protein 1 isoform Iso 1
nxp:NX_Q14974-1	876	6	97090	6	12	4.74626e-06	0.0811	21.6422	KPNB1	Importin subunit beta-1 isoform Iso 1
nxp:NX_Q14847-3	205	4	23149.2	11	44	7.43657e-05	0.3317	75.6542	LASP1	LIM and SH3 domain protein 1 isoform Iso 3
nxp:NX_Q14847-2	323	0	35972.7	13	81	8.68873e-05	0.3313	133.146	LASP1	LIM and SH3 domain protein 1 isoform Iso 2
nxp:NX_Q14847-1	261	3	29680.2	16	93	0.000123457	0.4904	149.228	LASP1	LIM and SH3 domain protein 1 isoform Iso 1
nxp:NX_Q14767-1	1821	2	194905	2	4	7.61069e-07	0.0115	5.474	LTBP2	Latent-transforming growth factor beta-binding protein 2 isoform Iso 1
nxp:NX_Q14764-1	893	16	99247.9	16	52	2.01756e-05	0.1814	84.8474	MVP	Major vault protein isoform Iso 1
nxp:NX_Q14697-3	52	0	5650.8	1	4	2.6652e-05	0.1731	5.2134	GANAB	Neutral alpha-glucosidase AB isoform Iso 3
nxp:NX_Q14697-2	966	0	109351	8	36	1.29122e-05	0.0911	54.65	GANAB	Neutral alpha-glucosidase AB isoform Iso 2
nxp:NX_Q14697-1	944	2	106789	8	40	1.46812e-05	0.0932	59.0664	GANAB	Neutral alpha-glucosidase AB isoform Iso 1
nxp:NX_Q14683-1	1233	2	143126	2	4	1.12401e-06	0.0187	6.5458	SMC1A	Structural maintenance of chromosomes protein 1A isoform Iso 1
nxp:NX_Q14651-1	629	3	70191.2	7	42	2.31352e-05	0.1208	65.8003	PLS1	Plastin-1 isoform Iso 1
nxp:NX_Q14624-4	845	24	93775	67	432	0.000177134	0.6024	783.522	ITIH4	Inter-alpha-trypsin inhibitor heavy chain H4 isoform Iso 4
nxp:NX_Q14624-3	900	3	99777.2	63	417	0.000160534	0.6067	762.741	ITIH4	Inter-alpha-trypsin inhibitor heavy chain H4 isoform Iso 3
nxp:NX_Q14624-2	914	0	101160	60	411	0.000155801	0.5963	752.645	ITIH4	Inter-alpha-trypsin inhibitor heavy chain H4 isoform Iso 2
nxp:NX_Q14624-1	930	0	103275	60	411	0.00015312	0.586	752.645	ITIH4	Inter-alpha-trypsin inhibitor heavy chain H4 isoform Iso 1
nxp:NX_Q14568-1	343	2	39322.4	13	138	0.000139399	0.3149	238.748	HSP90AA2P	Heat shock protein HSP 90-alpha A2 isoform Iso 1
nxp:NX_Q14532-1	448	0	50292.1	1	24	1.85612e-05	0.0156	35.8919	KRT32	Keratin, type I cuticular Ha2 isoform Iso 1
nxp:NX_Q14525-1	404	0	46166.5	1	24	2.05828e-05	0.0173	35.8919	KRT33B	Keratin, type I cuticular Ha3-II isoform Iso 1
nxp:NX_Q14520-1	560	4	62612.4	5	16	9.89933e-06	0.1071	27.4344	HABP2	Hyaluronan-binding protein 2 isoform Iso 1
nxp:NX_Q14515-1	664	2	75143.3	2	4	2.08721e-06	0.0482	7.578	SPARCL1	SPARC-like protein 1 isoform Iso 1
nxp:NX_Q14512-1	234	2	26229.4	2	4	5.92268e-06	0.0513	6.3622	FGFBP1	Fibroblast growth factor-binding protein 1 isoform Iso 1
nxp:NX_Q14508-5	102	0	11017.3	2	8	2.71746e-05	0.1961	9.859	WFDC2	WAP four-disulfide core domain protein 2 isoform Iso 5
nxp:NX_Q14508-4	80	0	8177.8	2	8	3.46477e-05	0.25	9.859	WFDC2	WAP four-disulfide core domain protein 2 isoform Iso 4
nxp:NX_Q14508-3	76	1	8083.9	21	554	0.00252563	0.7368	1000.46	WFDC2	WAP four-disulfide core domain protein 2 isoform Iso 3
nxp:NX_Q14508-2	73	8	8096.7	23	591	0.00280504	0.7397	1051.47	WFDC2	WAP four-disulfide core domain protein 2 isoform Iso 2
nxp:NX_Q14508-1	124	10	12965.9	32	815	0.00227725	0.5968	1622.75	WFDC2	WAP four-disulfide core domain protein 2 isoform Iso 1
nxp:NX_Q14315-2	2692	0	287084	6	26	3.34636e-06	0.0189	38.851	FLNC	Filamin-C isoform Iso 2
nxp:NX_Q14315-1	2725	0	290823	6	26	3.30583e-06	0.0187	38.851	FLNC	Filamin-C isoform Iso 1
nxp:NX_Q14254-1	428	6	47016.6	6	16	1.29524e-05	0.1565	28.0564	FLOT2	Flotillin-2 isoform Iso 1
nxp:NX_Q14240-2	408	0	46441.8	4	20	1.69841e-05	0.1127	27.6982	EIF4A2	Eukaryotic initiation factor 4A-II isoform Iso 2
nxp:NX_Q14240-1	407	0	46354.8	4	20	1.70259e-05	0.113	27.6982	EIF4A2	Eukaryotic initiation factor 4A-II isoform Iso 1
nxp:NX_Q14210-1	128	4	13259.7	4	30	8.12055e-05	0.2891	50.1714	LY6D	Lymphocyte antigen 6D isoform Iso 1
nxp:NX_Q14141-4	429	0	49118.1	2	4	3.23055e-06	0.028	5.0794	SEPTIN6	Septin-6 isoform V
nxp:NX_Q14141-1	434	0	49667.3	2	4	3.19333e-06	0.0276	5.0794	SEPTIN6	Septin-6 isoform II
nxp:NX_Q14118-1	895	3	97362.7	3	6	2.32275e-06	0.0816	9.5212	DAG1	Dystroglycan isoform Iso 1
nxp:NX_Q14103-4	287	3	30635.1	9	27	3.25954e-05	0.3449	43.1316	HNRNPD	Heterogeneous nuclear ribonucleoprotein D0 isoform Iso 4
nxp:NX_Q14103-3	306	1	32796.1	9	31	3.51006e-05	0.3203	57.7436	HNRNPD	Heterogeneous nuclear ribonucleoprotein D0 isoform Iso 3
nxp:NX_Q14103-2	336	0	36231.3	7	21	2.16548e-05	0.2351	36.4532	HNRNPD	Heterogeneous nuclear ribonucleoprotein D0 isoform Iso 2
nxp:NX_Q14103-1	355	0	38392.3	9	30	2.92797e-05	0.2761	56.5888	HNRNPD	Heterogeneous nuclear ribonucleoprotein D0 isoform Iso 1
nxp:NX_Q14019-1	142	13	15917	13	58	0.000141519	0.6549	100.078	COTL1	Coactosin-like protein isoform Iso 1
nxp:NX_Q13938-3	248	3	27007.4	15	205	0.000286402	0.3992	398.056	CAPS	Calcyphosin isoform Iso 2
nxp:NX_Q13938-1	275	3	30202.9	17	230	0.00028978	0.44	444.545	CAPS	Calcyphosin isoform Iso 1
nxp:NX_Q13885-1	445	0	49856.9	34	378	0.00029431	0.4427	657.844	TUBB2A	Tubulin beta-2A chain isoform Iso 1
nxp:NX_Q13813-3	2452	5	282090	23	55	7.7717e-06	0.1081	90.7528	SPTAN1	Spectrin alpha chain, non-erythrocytic 1 isoform Iso 3
nxp:NX_Q13813-2	2477	0	284901	20	51	7.13375e-06	0.0973	84.9341	SPTAN1	Spectrin alpha chain, non-erythrocytic 1 isoform Iso 2
nxp:NX_Q13813-1	2472	0	284346	20	51	7.14818e-06	0.0975	84.9341	SPTAN1	Spectrin alpha chain, non-erythrocytic 1 isoform Iso 1
nxp:NX_Q13765-1	215	0	23351.7	1	2	3.22304e-06	0.0651	5.1682	NACA	Nascent polypeptide-associated complex subunit alpha isoform Iso 1
nxp:NX_Q13740-4	305	0	33839.1	1	4	4.54396e-06	0.0951	8.0132	ALCAM	CD166 antigen isoform Iso 4
nxp:NX_Q13740-3	133	1	15081.6	3	6	1.56305e-05	0.3233	8.262	ALCAM	CD166 antigen isoform Iso 3
nxp:NX_Q13740-2	570	1	63606.5	8	20	1.21571e-05	0.2281	34.587	ALCAM	CD166 antigen isoform Iso 2
nxp:NX_Q13740-1	583	0	65043.1	7	18	1.06974e-05	0.211	32.4324	ALCAM	CD166 antigen isoform Iso 1
nxp:NX_Q13510-3	389	3	43999.4	10	52	4.63156e-05	0.3085	89.068	ASAH1	Acid ceramidase isoform Iso 3
nxp:NX_Q13510-2	411	0	46455.7	10	50	4.21504e-05	0.3358	87.249	ASAH1	Acid ceramidase isoform Iso 2
nxp:NX_Q13510-1	395	0	44612.8	9	48	4.21035e-05	0.2582	84.3676	ASAH1	Acid ceramidase isoform Iso 1
nxp:NX_Q13509-1	450	0	50382.2	26	219	0.000168619	0.3356	367.698	TUBB3	Tubulin beta-3 chain isoform Iso 1
nxp:NX_Q13464-1	1354	2	158058	2	4	1.02356e-06	0.0251	7.081	ROCK1	Rho-associated protein kinase 1 isoform Iso 1
nxp:NX_Q13442-1	181	1	20599.6	1	2	3.82847e-06	0.0884	4.4654	PDAP1	28 kDa heat- and acid-stable phosphoprotein isoform Iso 1
nxp:NX_Q13421-4	621	1	67879.6	17	78	4.35188e-05	0.2963	145.337	MSLN	Mesothelin isoform Iso 4
nxp:NX_Q13421-3	622	0	68008.7	16	76	4.23348e-05	0.2846	142.325	MSLN	Mesothelin isoform Iso 2
nxp:NX_Q13421-2	656	0	71429.3	16	76	4.01406e-05	0.2698	142.325	MSLN	Mesothelin isoform Iso 3
nxp:NX_Q13421-1	630	0	68924.2	13	68	3.73975e-05	0.2476	128.984	MSLN	Mesothelin isoform Iso 1
nxp:NX_Q13349-1	1161	0	126660	1	35	1.0445e-05	0.0095	53.9067	ITGAD	Integrin alpha-D isoform Iso 1
nxp:NX_Q13347-1	325	1	36460.6	1	4	4.26433e-06	0.0369	5.6742	EIF3I	Eukaryotic translation initiation factor 3 subunit I isoform Iso 1
nxp:NX_Q13277-3	277	0	31980.5	2	4	5.00327e-06	0.0758	5.7552	STX3	Syntaxin-3 isoform Iso 3
nxp:NX_Q13277-2	252	0	28824.2	2	4	5.49963e-06	0.0833	5.7552	STX3	Syntaxin-3 isoform B
nxp:NX_Q13277-1	289	0	33116.4	2	4	4.79552e-06	0.0727	5.7552	STX3	Syntaxin-3 isoform A
nxp:NX_Q13231-4	447	0	49563.2	17	80	6.20092e-05	0.434	162.28	CHIT1	Chitotriosidase-1 isoform Iso 4
nxp:NX_Q13231-3	437	1	48515.9	19	84	6.65996e-05	0.4645	168.137	CHIT1	Chitotriosidase-1 isoform Iso 3
nxp:NX_Q13231-2	387	5	43087.4	18	78	6.98325e-05	0.4806	156.416	CHIT1	Chitotriosidase-1 isoform Iso 2
nxp:NX_Q13231-1	466	0	51630.3	18	82	6.0968e-05	0.4356	165.219	CHIT1	Chitotriosidase-1 isoform Iso 1
nxp:NX_Q13228-4	514	0	56811.9	27	108	7.28005e-05	0.6654	195.205	SELENBP1	Methanethiol oxidase isoform Iso 4
nxp:NX_Q13228-3	410	1	45422	24	94	7.94361e-05	0.7585	171.225	SELENBP1	Methanethiol oxidase isoform Iso 3
nxp:NX_Q13228-1	472	0	52339.6	27	108	7.92786e-05	0.7246	195.205	SELENBP1	Methanethiol oxidase isoform Iso 1
nxp:NX_Q13217-1	504	3	57526.2	3	8	5.49963e-06	0.0714	13.0558	DNAJC3	DnaJ homolog subfamily C member 3 isoform Iso 1
nxp:NX_Q13185-1	183	5	20780.3	5	12	2.27198e-05	0.1967	19.6924	CBX3	Chromobox protein homolog 3 isoform Iso 1
nxp:NX_Q13162-1	271	3	30502.8	6	47	6.009e-05	0.2177	77.3368	PRDX4	Peroxiredoxin-4 isoform Iso 1
nxp:NX_Q13045-3	1258	0	143543	2	4	1.10167e-06	0.0167	5.7214	FLII	Protein flightless-1 homolog isoform Iso 3
nxp:NX_Q13045-2	1214	1	138387	3	6	1.71241e-06	0.0264	8.1072	FLII	Protein flightless-1 homolog isoform Iso 2
nxp:NX_Q13045-1	1269	0	144642	2	4	1.09212e-06	0.0165	5.7214	FLII	Protein flightless-1 homolog isoform Iso 1
nxp:NX_Q13011-1	328	3	35775.4	3	8	8.45065e-06	0.1433	16.1284	ECH1	Delta(3,5)-Delta(2,4)-dienoyl-CoA isomerase, mitochondrial isoform Iso 1
nxp:NX_Q12950-1	439	0	47262	2	8	6.31392e-06	0.0159	8.9886	FOXD4	Forkhead box protein D4 isoform Iso 1
nxp:NX_Q12929-1	822	7	91806.4	7	16	6.74407e-06	0.1314	20.84	EPS8	Epidermal growth factor receptor kinase substrate 8 isoform Iso 1
nxp:NX_Q12913-2	539	1	57136.8	6	17	1.09278e-05	0.167	29.1451	PTPRJ	Receptor-type tyrosine-protein phosphatase eta isoform Iso 2
nxp:NX_Q12913-1	1337	2	145833	7	18	4.66461e-06	0.0905	32.8228	PTPRJ	Receptor-type tyrosine-protein phosphatase eta isoform Iso 1
nxp:NX_Q12841-2	273	1	31190.1	7	44	5.58424e-05	0.1978	69.7226	FSTL1	Follistatin-related protein 1 isoform Iso 2
nxp:NX_Q12841-1	308	4	34944.8	10	61	6.86204e-05	0.2825	97.7096	FSTL1	Follistatin-related protein 1 isoform Iso 1
nxp:NX_Q12805-5	355	3	39151.5	15	74	7.22233e-05	0.4423	112.134	EFEMP1	EGF-containing fibulin-like extracellular matrix protein 1 isoform Iso 5
nxp:NX_Q12805-4	492	0	54499.2	18	92	6.47883e-05	0.4024	152.062	EFEMP1	EGF-containing fibulin-like extracellular matrix protein 1 isoform Iso 4
nxp:NX_Q12805-3	492	2	54529.2	17	92	6.47883e-05	0.3943	150.796	EFEMP1	EGF-containing fibulin-like extracellular matrix protein 1 isoform Iso 3
nxp:NX_Q12805-1	493	0	54586.2	18	92	6.46569e-05	0.4016	152.062	EFEMP1	EGF-containing fibulin-like extracellular matrix protein 1 isoform Iso 1
nxp:NX_Q12802-4	2793	1	305073	2	6	7.44311e-07	0.0029	7.8877	AKAP13	A-kinase anchor protein 13 isoform Iso 3
nxp:NX_Q12802-2	2817	0	307636	2	4	4.9198e-07	0.0028	5.1848	AKAP13	A-kinase anchor protein 13 isoform Iso 2
nxp:NX_Q12802-1	2813	0	307341	2	4	4.92679e-07	0.0028	5.1848	AKAP13	A-kinase anchor protein 13 isoform Iso 1
nxp:NX_Q12765-2	434	2	48664.5	2	4	3.19333e-06	0.0645	9.0786	SCRN1	Secernin-1 isoform Iso 2
nxp:NX_Q11128-1	374	0	42962.4	2	4	3.70563e-06	0.0615	6.0764	FUT5	4-galactosyl-N-acetylglucosaminide 3-alpha-L-fucosyltransferase FUT5 isoform Iso 1
nxp:NX_Q10589-1	180	3	19738.3	3	8	1.5399e-05	0.1833	13.4582	BST2	Bone marrow stromal antigen 2 isoform Iso 1
nxp:NX_Q10588-2	260	2	29289.5	10	54	7.19605e-05	0.3269	85.2884	BST1	ADP-ribosyl cyclase/cyclic ADP-ribose hydrolase 2 isoform Iso 2
nxp:NX_Q10588-1	318	4	35683.1	12	89	9.69699e-05	0.3302	140.764	BST1	ADP-ribosyl cyclase/cyclic ADP-ribose hydrolase 2 isoform Iso 1
nxp:NX_Q10567-4	919	0	101266	3	8	3.01612e-06	0.0392	11.1198	AP1B1	AP-1 complex subunit beta-1 isoform Iso 4
nxp:NX_Q10567-3	939	0	103480	3	8	2.95188e-06	0.0383	11.1198	AP1B1	AP-1 complex subunit beta-1 isoform C
nxp:NX_Q10567-2	942	0	103837	3	8	2.94248e-06	0.0382	11.1198	AP1B1	AP-1 complex subunit beta-1 isoform B
nxp:NX_Q10567-1	949	0	104552	3	8	2.92077e-06	0.0379	11.1198	AP1B1	AP-1 complex subunit beta-1 isoform A
nxp:NX_Q0VD83-4	1097	0	115546	12	30	9.4752e-06	0.1167	47.2053	APOBR	Apolipoprotein B receptor isoform Iso 4
nxp:NX_Q0VD83-3	1078	2	113714	14	34	1.09278e-05	0.1289	54.2727	APOBR	Apolipoprotein B receptor isoform Iso 3
nxp:NX_Q09666-1	5890	4	628681	4	8	4.70596e-07	0.0112	16.0418	AHNAK	Neuroblast differentiation-associated protein AHNAK isoform Iso 1
nxp:NX_Q08ET2-1	396	2	43924.2	7	16	1.39991e-05	0.2652	26.5166	SIGLEC14	Sialic acid-binding Ig-like lectin 14 isoform Iso 1
nxp:NX_Q08554-2	840	0	93758	2	4	1.64989e-06	0.0286	5.7922	DSC1	Desmocollin-1 isoform 1B
nxp:NX_Q08554-1	894	0	99905.7	2	4	1.55023e-06	0.0268	5.7922	DSC1	Desmocollin-1 isoform 1A
nxp:NX_Q08477-2	520	0	59682	1	4	2.6652e-06	0.0269	11.209	CYP4F3	Cytochrome P450 4F3 isoform CYP4F3B
nxp:NX_Q08477-1	520	0	59789.9	1	4	2.6652e-06	0.0269	11.209	CYP4F3	Cytochrome P450 4F3 isoform CYP4F3A
nxp:NX_Q08380-1	585	54	65271.3	54	969	0.000573907	0.5641	1919.69	LGALS3BP	Galectin-3-binding protein isoform Iso 1
nxp:NX_Q08345-6	894	0	98982.8	2	4	1.55023e-06	0.0246	5.9292	DDR1	Epithelial discoidin domain-containing receptor 1 isoform Iso 5
nxp:NX_Q08345-5	919	0	101713	2	4	1.50806e-06	0.0239	5.9292	DDR1	Epithelial discoidin domain-containing receptor 1 isoform Iso 4
nxp:NX_Q08345-1	913	0	101045	2	4	1.51797e-06	0.0241	5.9292	DDR1	Epithelial discoidin domain-containing receptor 1 isoform Iso 1
nxp:NX_Q08043-1	901	0	103158	12	82	3.15328e-05	0.1176	147.301	ACTN3	Alpha-actinin-3 isoform Iso 1
nxp:NX_Q07960-1	439	2	50386.2	2	4	3.15696e-06	0.0342	11.6844	ARHGAP1	Rho GTPase-activating protein 1 isoform Iso 1
nxp:NX_Q07812-8	179	0	19687.1	2	6	1.16137e-05	0.1453	10.684	BAX	Apoptosis regulator BAX isoform Sigma
nxp:NX_Q07812-5	164	0	18099.1	2	6	1.2676e-05	0.1585	10.684	BAX	Apoptosis regulator BAX isoform Epsilon
nxp:NX_Q07812-2	218	0	24186.4	2	6	9.53605e-06	0.1193	10.684	BAX	Apoptosis regulator BAX isoform Beta
nxp:NX_Q07812-1	192	0	21152.8	2	6	1.08274e-05	0.1354	10.684	BAX	Apoptosis regulator BAX isoform Alpha
nxp:NX_Q07654-1	94	30	10155.9	30	550	0.00202726	0.6277	1151.22	TFF3	Trefoil factor 3 isoform Iso 1
nxp:NX_Q07065-1	602	2	65964.7	2	4	2.30217e-06	0.0465	6.9132	CKAP4	Cytoskeleton-associated protein 4 isoform Iso 1
nxp:NX_Q06830-1	199	19	22078.3	22	149	0.000259422	0.6482	255.213	PRDX1	Peroxiredoxin-1 isoform Iso 1
nxp:NX_Q06828-1	376	4	43133.5	4	14	1.29007e-05	0.117	24.0962	FMOD	Fibromodulin isoform Iso 1
nxp:NX_Q06323-3	233	0	26834.9	10	42	6.2455e-05	0.5322	72.1394	PSME1	Proteasome activator complex subunit 1 isoform Iso 3
nxp:NX_Q06323-2	250	0	28565.9	10	42	5.82081e-05	0.496	72.1394	PSME1	Proteasome activator complex subunit 1 isoform Iso 2
nxp:NX_Q06323-1	249	1	28687	11	46	6.40077e-05	0.5462	81.5674	PSME1	Proteasome activator complex subunit 1 isoform Iso 1
nxp:NX_Q06033-2	886	3	99247.3	11	26	1.01675e-05	0.1467	45.2273	ITIH3	Inter-alpha-trypsin inhibitor heavy chain H3 isoform Iso 2
nxp:NX_Q06033-1	890	0	99768.5	8	20	7.78599e-06	0.1146	36.0789	ITIH3	Inter-alpha-trypsin inhibitor heavy chain H3 isoform Iso 1
nxp:NX_Q05639-1	463	0	50420.3	13	162	0.000121229	0.2311	270.594	EEF1A2	Elongation factor 1-alpha 2 isoform Iso 1
nxp:NX_Q04917-1	246	11	28183	15	100	0.000140844	0.5122	142.127	YWHAH	14-3-3 protein eta isoform Iso 1
nxp:NX_Q04828-1	323	0	36747	1	6	6.4361e-06	0.0588	18.7648	AKR1C1	Aldo-keto reductase family 1 member C1 isoform Iso 1
nxp:NX_Q04695-1	432	14	48058	31	409	0.00032803	0.5509	638.294	KRT17	Keratin, type I cytoskeletal 17 isoform Iso 1
nxp:NX_Q04446-1	702	6	80404.6	6	14	6.90979e-06	0.0997	20.8152	GBE1	1,4-alpha-glucan-branching enzyme isoform Iso 1
nxp:NX_Q04118-1	309	21	30943.6	26	284	0.000318445	0.3948	692.457	PRB3	Basic salivary proline-rich protein 3 isoform Iso 1
nxp:NX_Q03591-1	330	10	37608	23	264	0.000277181	0.7091	456.121	CFHR1	Complement factor H-related protein 1 isoform Iso 1
nxp:NX_Q03405-3	290	0	31977	2	6	7.16848e-06	0.0621	10.1724	PLAUR	Urokinase plasminogen activator surface receptor isoform Iso 3
nxp:NX_Q03405-2	281	1	31224.6	3	16	1.97282e-05	0.1566	25.7442	PLAUR	Urokinase plasminogen activator surface receptor isoform Iso 2
nxp:NX_Q03405-1	335	0	36935.2	3	14	1.44796e-05	0.1313	23.9188	PLAUR	Urokinase plasminogen activator surface receptor isoform Iso 1
nxp:NX_Q03252-1	620	5	69887.7	10	39	2.17945e-05	0.1194	57.5052	LMNB2	Lamin-B2 isoform Iso 1
nxp:NX_Q02985-2	269	1	30681.6	5	23	2.96244e-05	0.2156	38.3086	CFHR3	Complement factor H-related protein 3 isoform Iso 2
nxp:NX_Q02985-1	330	0	37280.7	4	21	2.20485e-05	0.1455	35.402	CFHR3	Complement factor H-related protein 3 isoform Iso 1
nxp:NX_Q02818-1	461	20	53828.3	20	72	5.41135e-05	0.4837	116.303	NUCB1	Nucleobindin-1 isoform Iso 1
nxp:NX_Q02817-1	5179	8	539940	10	94	6.28863e-06	0.0232	121.299	MUC2	Mucin-2 isoform Iso 1
nxp:NX_Q02543-1	176	1	20730.9	1	4	7.87447e-06	0.0455	6.184	RPL18A	60S ribosomal protein L18a isoform Iso 1
nxp:NX_Q02539-1	215	0	21810.9	18	436	0.000702622	0.1907	847.426	H1-1	Histone H1.1 isoform Iso 1
nxp:NX_Q02383-1	582	3	65387.4	4	10	5.95321e-06	0.0979	15.023	SEMG2	Semenogelin-2 isoform Iso 1
nxp:NX_Q02325-1	96	1	10945.5	2	8	2.88731e-05	0.125	11.7052	PLGLB1	Plasminogen-like protein B isoform Iso 1
nxp:NX_Q01844-6	600	0	62451	1	1	5.77461e-07	0.025	2.5068	EWSR1	RNA-binding protein EWS isoform Iso 6
nxp:NX_Q01844-5	661	0	68904.9	1	1	5.2417e-07	0.0227	2.5068	EWSR1	RNA-binding protein EWS isoform Iso 5
nxp:NX_Q01844-3	655	0	68330.7	1	1	5.28972e-07	0.0229	2.5068	EWSR1	RNA-binding protein EWS isoform Iso 3
nxp:NX_Q01844-2	583	0	61161.4	1	1	5.943e-07	0.0257	2.5068	EWSR1	RNA-binding protein EWS isoform EWS-B
nxp:NX_Q01844-1	656	0	68417.7	1	1	5.28166e-07	0.0229	2.5068	EWSR1	RNA-binding protein EWS isoform EWS
nxp:NX_Q01826-2	795	0	89053.1	2	4	1.74328e-06	0.0201	5.703	SATB1	DNA-binding protein SATB1 isoform Iso 2
nxp:NX_Q01826-1	763	0	85885.5	2	4	1.81639e-06	0.021	5.703	SATB1	DNA-binding protein SATB1 isoform Iso 1
nxp:NX_Q01629-1	132	0	14604.5	3	150	0.000393723	0.1212	356.78	IFITM2	Interferon-induced transmembrane protein 2 isoform Iso 1
nxp:NX_Q01628-1	133	0	14604.5	4	152	0.000395973	0.218	361.969	IFITM3	Interferon-induced transmembrane protein 3 isoform Iso 1
nxp:NX_Q01546-1	638	0	65782.1	11	213	0.000115673	0.1301	346.924	KRT76	Keratin, type II cytoskeletal 2 oral isoform Iso 1
nxp:NX_Q01518-2	474	18	51779.6	57	504	0.000368406	0.7342	893.021	CAP1	Adenylyl cyclase-associated protein 1 isoform Iso 2
nxp:NX_Q01518-1	475	1	51850.7	49	478	0.000348665	0.7158	876.502	CAP1	Adenylyl cyclase-associated protein 1 isoform Iso 1
nxp:NX_Q01469-1	135	9	15136.5	14	75	0.000192487	0.6667	140.273	FABP5	Fatty acid-binding protein 5 isoform Iso 1
nxp:NX_Q01459-1	385	5	43713.6	5	12	1.07993e-05	0.1662	18.9292	CTBS	Di-N-acetylchitobiase isoform Iso 1
nxp:NX_Q01082-3	2155	2	251223	15	37	5.94879e-06	0.0784	55.038	SPTBN1	Spectrin beta chain, non-erythrocytic 1 isoform Iso 2
nxp:NX_Q01082-2	2168	0	252916	13	33	5.27386e-06	0.0701	50.3856	SPTBN1	Spectrin beta chain, non-erythrocytic 1 isoform Short
nxp:NX_Q01082-1	2364	2	274421	15	42	6.15568e-06	0.0749	65.8505	SPTBN1	Spectrin beta chain, non-erythrocytic 1 isoform Long
nxp:NX_Q00839-2	806	0	88906.1	6	14	6.0182e-06	0.0558	23.6328	HNRNPU	Heterogeneous nuclear ribonucleoprotein U isoform Iso 2
nxp:NX_Q00839-1	825	1	90510	7	16	6.71955e-06	0.0788	26.4342	HNRNPU	Heterogeneous nuclear ribonucleoprotein U isoform Iso 1
nxp:NX_Q00765-1	189	2	21461	2	6	1.09993e-05	0.0952	7.7392	REEP5	Receptor expression-enhancing protein 5 isoform Iso 1
nxp:NX_Q00610-2	1639	5	187753	18	58	1.22609e-05	0.1269	81.199	CLTC	Clathrin heavy chain 1 isoform Iso 2
nxp:NX_Q00610-1	1675	0	191474	16	48	9.92888e-06	0.1104	71.7802	CLTC	Clathrin heavy chain 1 isoform Iso 1
nxp:NX_Q00325-2	361	0	39914.6	3	6	5.75861e-06	0.0637	8.3672	SLC25A3	Phosphate carrier protein, mitochondrial isoform B
nxp:NX_Q00325-1	362	0	40050.7	3	6	5.74271e-06	0.0635	8.3672	SLC25A3	Phosphate carrier protein, mitochondrial isoform A
nxp:NX_P99999-1	105	5	11723.1	5	10	3.29978e-05	0.5619	13.154	CYCS	Cytochrome c isoform Iso 1
nxp:NX_P98187-1	520	0	59938.2	1	4	2.6652e-06	0.0269	11.209	CYP4F8	Cytochrome P450 4F8 isoform Iso 1
nxp:NX_P98088-1	5654	262	585181	292	6303	0.000386247	0.2897	11525.9	MUC5AC	Mucin-5AC isoform Iso 1
nxp:NX_P84243-1	136	4	15300.5	38	1086	0.00276672	0.75	1719.43	H3-3A	Histone H3.3 isoform Iso 1
nxp:NX_P84095-1	191	3	21276.9	5	120	0.000217682	0.3455	206.674	RHOG	Rho-related GTP-binding protein RhoG isoform Iso 1
nxp:NX_P84085-1	180	0	20498.6	4	18	3.46477e-05	0.2833	32.831	ARF5	ADP-ribosylation factor 5 isoform Iso 1
nxp:NX_P84077-1	181	0	20665.7	10	38	7.27409e-05	0.4696	61.8706	ARF1	ADP-ribosylation factor 1 isoform Iso 1
nxp:NX_P80748-1	117	10	12420	14	167	0.000494544	0.6496	323.426	IGLV3-21	Immunoglobulin lambda variable 3-21 isoform Iso 1
nxp:NX_P80723-2	173	13	17635.6	31	427	0.000855176	0.8844	822.191	BASP1	Brain acid soluble protein 1 isoform Iso 2
nxp:NX_P80723-1	227	14	22662	40	562	0.000857797	0.9031	1138.88	BASP1	Brain acid soluble protein 1 isoform Iso 1
nxp:NX_P80511-1	92	20	10550.5	20	422	0.00158927	0.837	974.018	S100A12	Protein S100-A12 isoform Iso 1
nxp:NX_P80303-2	420	5	50178.4	29	168	0.000138591	0.5738	340.063	NUCB2	Nucleobindin-2 isoform Iso 2
nxp:NX_P80303-1	420	0	50173.3	25	159	0.000131166	0.5714	326.554	NUCB2	Nucleobindin-2 isoform Iso 1
nxp:NX_P80297-1	61	0	6045.2	2	8	4.54396e-05	0.2131	14.6724	MT1X	Metallothionein-1X isoform Iso 1
nxp:NX_P80188-2	198	24	22424.7	58	1597	0.00279456	0.798	2954.64	LCN2	Neutrophil gelatinase-associated lipocalin isoform Iso 2
nxp:NX_P80188-1	198	1	22555.7	51	1684	0.0029468	0.8283	3152.94	LCN2	Neutrophil gelatinase-associated lipocalin isoform Iso 1
nxp:NX_P78527-2	4097	0	465184	4	8	6.76547e-07	0.011	13.1664	PRKDC	DNA-dependent protein kinase catalytic subunit isoform Iso 2
nxp:NX_P78527-1	4128	0	468770	4	8	6.71466e-07	0.0109	13.1664	PRKDC	DNA-dependent protein kinase catalytic subunit isoform Iso 1
nxp:NX_P78417-2	208	1	23675	8	20	3.33151e-05	0.4663	29.4238	GSTO1	Glutathione S-transferase omega-1 isoform Iso 2
nxp:NX_P78417-1	241	1	27530	8	20	2.87532e-05	0.4108	29.3906	GSTO1	Glutathione S-transferase omega-1 isoform Iso 1
nxp:NX_P78371-1	535	11	57434.1	11	34	2.20191e-05	0.2822	51.8042	CCT2	T-complex protein 1 subunit beta isoform Iso 1
nxp:NX_P78329-2	190	0	21677.1	1	4	7.29424e-06	0.0737	11.209	CYP4F2	Cytochrome P450 4F2 isoform Iso 2
nxp:NX_P78329-1	520	0	59796.8	1	4	2.6652e-06	0.0269	11.209	CYP4F2	Cytochrome P450 4F2 isoform Iso 1
nxp:NX_P78324-4	503	0	54799.8	11	42	2.89305e-05	0.2604	66.6626	SIRPA	Tyrosine-protein phosphatase non-receptor type substrate 1 isoform Iso 4
nxp:NX_P78324-2	508	0	55342.1	11	42	2.86457e-05	0.2579	66.6626	SIRPA	Tyrosine-protein phosphatase non-receptor type substrate 1 isoform Iso 2
nxp:NX_P78324-1	504	0	54914.8	11	42	2.88731e-05	0.2599	66.6626	SIRPA	Tyrosine-protein phosphatase non-receptor type substrate 1 isoform Iso 1
nxp:NX_P69905-1	142	136	15229.9	137	4741	0.0115679	1	10259.3	HBA1	Hemoglobin subunit alpha isoform Iso 1
nxp:NX_P69892-1	147	4	16098.3	14	816	0.0019233	0.6871	1347.57	HBG2	Hemoglobin subunit gamma-2 isoform Iso 1
nxp:NX_P69891-1	147	1	16112.3	11	809	0.0019068	0.5714	1334.4	HBG1	Hemoglobin subunit gamma-1 isoform Iso 1
nxp:NX_P68871-1	147	77	15970.3	127	6344	0.0149527	0.966	13376.4	HBB	Hemoglobin subunit beta isoform Iso 1
nxp:NX_P68431-1	136	6	15376.5	44	1408	0.00358705	0.75	2405.21	H3C1	Histone H3.1 isoform Iso 1
nxp:NX_P68371-1	445	3	49781	41	467	0.000363606	0.627	816.777	TUBB4B	Tubulin beta-4B chain isoform Iso 1
nxp:NX_P68366-1	448	2	49874.4	37	218	0.000168598	0.5982	379.295	TUBA4A	Tubulin alpha-4A chain isoform Iso 1
nxp:NX_P68363-2	335	8	37176.1	41	260	0.000268907	0.8269	469.963	TUBA1B	Tubulin alpha-1B chain isoform Iso 2
nxp:NX_P68363-1	451	0	50101.6	45	296	0.000227399	0.796	521.865	TUBA1B	Tubulin alpha-1B chain isoform Iso 1
nxp:NX_P68133-1	377	5	42005.8	134	4715	0.00433326	0.6048	8581	ACTA1	Actin, alpha skeletal muscle isoform Iso 1
nxp:NX_P68104-1	462	12	50091.1	32	258	0.000193487	0.6061	447.517	EEF1A1	Elongation factor 1-alpha 1 isoform Iso 1
nxp:NX_P68036-2	122	2	14094.3	2	4	1.13599e-05	0.4918	5.8554	UBE2L3	Ubiquitin-conjugating enzyme E2 L3 isoform Iso 2
nxp:NX_P68032-1	377	0	41973.9	140	4896	0.0044996	0.6499	8955.47	ACTC1	Actin, alpha cardiac muscle 1 isoform Iso 1
nxp:NX_P67936-2	284	1	32684.6	19	211	0.000257417	0.3275	421.944	TPM4	Tropomyosin alpha-4 chain isoform Iso 2
nxp:NX_P67936-1	248	6	28486.5	24	235	0.000328315	0.504	466.659	TPM4	Tropomyosin alpha-4 chain isoform Iso 1
nxp:NX_P63313-1	44	3	5004.5	3	31	0.000244109	0.4545	52.7838	TMSB10	Thymosin beta-10 isoform Iso 1
nxp:NX_P63267-2	333	53	37041.4	93	3525	0.00366766	0.6066	6262.47	ACTG2	Actin, gamma-enteric smooth muscle isoform Iso 2
nxp:NX_P63267-1	376	5	41831.8	129	4831	0.00445167	0.5984	8804.43	ACTG2	Actin, gamma-enteric smooth muscle isoform Iso 1
nxp:NX_P63261-1	375	3	41747.8	239	7618	0.00703856	0.9413	15021.7	ACTG1	Actin, cytoplasmic 2 isoform Iso 1
nxp:NX_P63241-2	184	0	20139.2	4	18	3.38945e-05	0.212	30.0558	EIF5A	Eukaryotic translation initiation factor 5A-1 isoform Iso 2
nxp:NX_P63218-1	68	2	7295.8	2	4	2.0381e-05	0.2353	6.302	GNG5	Guanine nucleotide-binding protein G(I)/G(S)/G(O) subunit gamma-5 isoform Iso 1
nxp:NX_P63208-2	160	0	18033.9	2	4	8.66192e-06	0.225	5.417	SKP1	S-phase kinase-associated protein 1 isoform Iso 2
nxp:NX_P63208-1	163	1	18628.2	3	6	1.27537e-05	0.3252	9.3866	SKP1	S-phase kinase-associated protein 1 isoform Iso 1
nxp:NX_P63167-1	89	1	10341.1	3	10	3.893e-05	0.4944	17.0828	DYNLL1	Dynein light chain 1, cytoplasmic isoform Iso 1
nxp:NX_P63104-2	170	7	19302.5	18	132	0.000269029	0.6353	216.125	YWHAZ	14-3-3 protein zeta/delta isoform Iso 2
nxp:NX_P63104-1	245	22	27709.7	40	420	0.00059396	0.7429	721.818	YWHAZ	14-3-3 protein zeta/delta isoform Iso 1
nxp:NX_P63096-1	354	0	40317.2	6	22	2.15324e-05	0.1723	34.052	GNAI1	Guanine nucleotide-binding protein G(i) subunit alpha-1 isoform Iso 1
nxp:NX_P63092-4	395	0	45704.9	2	4	3.50862e-06	0.0886	5.4216	GNAS	Guanine nucleotide-binding protein G(s) subunit alpha isoforms short isoform Iso 4
nxp:NX_P63092-3	379	0	44133.3	2	4	3.65675e-06	0.0923	5.4216	GNAS	Guanine nucleotide-binding protein G(s) subunit alpha isoforms short isoform Iso 3
nxp:NX_P63092-2	380	0	44220.3	2	4	3.64712e-06	0.0921	5.4216	GNAS	Guanine nucleotide-binding protein G(s) subunit alpha isoforms short isoform Gnas-2
nxp:NX_P63092-1	394	0	45617.9	2	4	3.51753e-06	0.0888	5.4216	GNAS	Guanine nucleotide-binding protein G(s) subunit alpha isoforms short isoform Gnas-1
nxp:NX_P63000-2	211	0	23434.3	11	183	0.000300499	0.4976	316.349	RAC1	Ras-related C3 botulinum toxin substrate 1 isoform B
nxp:NX_P63000-1	192	4	21418.2	14	196	0.000353695	0.6719	337.254	RAC1	Ras-related C3 botulinum toxin substrate 1 isoform A
nxp:NX_P62987-1	128	4	14700.9	13	476	0.00128846	0.5156	765.589	UBA52	Ubiquitin-60S ribosomal protein L40 isoform Iso 1
nxp:NX_P62979-1	156	0	17935.5	12	464	0.00103055	0.4231	749.66	RPS27A	Ubiquitin-40S ribosomal protein S27a isoform Iso 1
nxp:NX_P62942-1	108	8	11925.1	8	56	0.000179655	0.5093	109.155	FKBP1A	Peptidyl-prolyl cis-trans isomerase FKBP1A isoform Iso 1
nxp:NX_P62937-1	165	22	17982.9	27	385	0.000808445	0.8909	712.3	PPIA	Peptidyl-prolyl cis-trans isomerase A isoform Iso 1
nxp:NX_P62888-1	115	2	12757.7	2	4	1.20514e-05	0.2348	5.257	RPL30	60S ribosomal protein L30 isoform Iso 1
nxp:NX_P62879-1	340	5	37289	12	90	9.17144e-05	0.4588	131.241	GNB2	Guanine nucleotide-binding protein G(I)/G(S)/G(T) subunit beta-2 isoform Iso 1
nxp:NX_P62873-2	332	2	36256.5	9	82	8.55756e-05	0.3614	116.763	GNB1	Guanine nucleotide-binding protein G(I)/G(S)/G(T) subunit beta-1 isoform Iso 2
nxp:NX_P62873-1	340	1	37335	11	82	8.3562e-05	0.4206	118.698	GNB1	Guanine nucleotide-binding protein G(I)/G(S)/G(T) subunit beta-1 isoform Iso 1
nxp:NX_P62834-1	184	1	20955.7	8	42	7.90871e-05	0.4076	57.4886	RAP1A	Ras-related protein Rap-1A isoform Iso 1
nxp:NX_P62826-1	216	6	24389.6	6	42	6.73705e-05	0.1574	69.6841	RAN	GTP-binding nuclear protein Ran isoform Iso 1
nxp:NX_P62820-2	141	2	15302.7	4	10	2.45728e-05	0.3191	16.227	RAB1A	Ras-related protein Rab-1A isoform Iso 2
nxp:NX_P62820-1	205	0	22645.4	3	6	1.01408e-05	0.1756	11.0844	RAB1A	Ras-related protein Rab-1A isoform Iso 1
nxp:NX_P62807-1	126	0	13879.5	55	3340	0.00918438	0.8333	6255.18	H2BC10	Histone H2B type 1-C/E/F/G/I isoform Iso 1
nxp:NX_P62805-1	103	58	11342.4	59	3165	0.0106466	0.6214	6172.65	H4-16	Histone H4 isoform Iso 1
nxp:NX_P62750-1	156	2	17666.1	2	25	5.55251e-05	0.0769	50.7562	RPL23A	60S ribosomal protein L23a isoform Iso 1
nxp:NX_P62736-1	377	1	41963.8	129	4825	0.00443435	0.6154	8803.38	ACTA2	Actin, aortic smooth muscle isoform Iso 1
nxp:NX_P62714-1	309	2	35534.3	2	4	4.48513e-06	0.0518	5.2132	PPP2CB	Serine/threonine-protein phosphatase 2A catalytic subunit beta isoform isoform Iso 1
nxp:NX_P62633-8	171	0	18840.3	2	4	8.10472e-06	0.1228	7.9828	CNBP	Cellular nucleic acid-binding protein isoform Iso 8
nxp:NX_P62633-7	160	0	17661.7	2	4	8.66192e-06	0.1312	7.9828	CNBP	Cellular nucleic acid-binding protein isoform Iso 7
nxp:NX_P62633-6	179	0	19659.7	2	4	7.74249e-06	0.1173	7.9828	CNBP	Cellular nucleic acid-binding protein isoform Iso 6
nxp:NX_P62633-5	172	0	18939.3	2	4	8.0576e-06	0.1221	7.9828	CNBP	Cellular nucleic acid-binding protein isoform Iso 5
nxp:NX_P62633-4	178	0	19560.6	2	4	7.78599e-06	0.118	7.9828	CNBP	Cellular nucleic acid-binding protein isoform Iso 4
nxp:NX_P62633-3	167	0	18382	2	4	8.29884e-06	0.1257	7.9828	CNBP	Cellular nucleic acid-binding protein isoform Iso 3
nxp:NX_P62633-2	170	0	18711.2	2	4	8.15239e-06	0.1235	7.9828	CNBP	Cellular nucleic acid-binding protein isoform Iso 2
nxp:NX_P62633-1	177	0	19431.6	2	4	7.82998e-06	0.1186	7.9828	CNBP	Cellular nucleic acid-binding protein isoform Iso 1
nxp:NX_P62491-2	155	1	17630.1	6	18	4.0236e-05	0.3935	27.5796	RAB11A	Ras-related protein Rab-11A isoform Iso 2
nxp:NX_P62491-1	216	0	24360.4	5	16	2.56649e-05	0.2454	25.1908	RAB11A	Ras-related protein Rab-11A isoform Iso 1
nxp:NX_P62424-1	266	4	29959	4	11	1.4328e-05	0.1203	18.4142	RPL7A	60S ribosomal protein L7a isoform Iso 1
nxp:NX_P62328-1	44	21	5031.5	24	265	0.00208673	0.8864	630.562	TMSB4X	Thymosin beta-4 isoform Iso 1
nxp:NX_P62269-1	152	2	17689.8	2	4	9.11781e-06	0.1316	6.3078	RPS18	40S ribosomal protein S18 isoform Iso 1
nxp:NX_P62258-1	255	20	29137.4	24	199	0.000270388	0.6549	322.668	YWHAE	14-3-3 protein epsilon isoform Iso 1
nxp:NX_P61981-1	247	7	28266.9	15	127	0.000178148	0.4372	190.41	YWHAG	14-3-3 protein gamma isoform Iso 1
nxp:NX_P61978-3	440	1	48514.2	8	20	1.57489e-05	0.2273	29.3844	HNRNPK	Heterogeneous nuclear ribonucleoprotein K isoform Iso 3
nxp:NX_P61978-2	464	0	50978.4	7	18	1.34409e-05	0.194	27.322	HNRNPK	Heterogeneous nuclear ribonucleoprotein K isoform Iso 2
nxp:NX_P61978-1	463	0	50926.4	7	18	1.34699e-05	0.1944	27.322	HNRNPK	Heterogeneous nuclear ribonucleoprotein K isoform Iso 1
nxp:NX_P61956-2	71	1	8088	2	35	0.000170798	0.169	54.7246	SUMO2	Small ubiquitin-related modifier 2 isoform Iso 2
nxp:NX_P61956-1	95	0	10846.4	1	31	0.000113061	0.1263	48.9574	SUMO2	Small ubiquitin-related modifier 2 isoform Iso 1
nxp:NX_P61916-2	125	3	13388.8	13	179	0.000496155	0.616	339.269	NPC2	NPC intracellular cholesterol transporter 2 isoform Iso 2
nxp:NX_P61916-1	151	3	16541.5	16	214	0.000491033	0.5563	387.154	NPC2	NPC intracellular cholesterol transporter 2 isoform Iso 1
nxp:NX_P61769-1	119	42	13687.9	42	675	0.00196531	0.7815	1322.85	B2M	Beta-2-microglobulin isoform Iso 1
nxp:NX_P61626-1	148	164	16508.3	164	15648	0.0366329	0.8716	31824.5	LYZ	Lysozyme C isoform Iso 1
nxp:NX_P61604-1	102	10	10906.9	10	82	0.00027854	0.6569	128.769	HSPE1	10 kDa heat shock protein, mitochondrial isoform Iso 1
nxp:NX_P61586-1	193	10	21736.1	21	186	0.00033391	0.6995	321.974	RHOA	Transforming protein RhoA isoform Iso 1
nxp:NX_P61224-4	142	1	16005.3	6	32	7.80792e-05	0.4507	47.603	RAP1B	Ras-related protein Rap-1b isoform Iso 4
nxp:NX_P61224-3	165	0	18748.6	8	46	9.65935e-05	0.4545	64.4186	RAP1B	Ras-related protein Rap-1b isoform Iso 3
nxp:NX_P61224-2	137	2	15327.9	8	48	0.000121393	0.4964	67.1914	RAP1B	Ras-related protein Rap-1b isoform Iso 2
nxp:NX_P61224-1	184	0	20793.6	8	46	8.66192e-05	0.4076	64.4186	RAP1B	Ras-related protein Rap-1b isoform Iso 1
nxp:NX_P61204-2	144	1	16116.5	7	22	5.29339e-05	0.3542	32.9752	ARF3	ADP-ribosylation factor 3 isoform Iso 2
nxp:NX_P61204-1	181	0	20569.7	10	38	7.27409e-05	0.4696	61.8706	ARF3	ADP-ribosylation factor 3 isoform Iso 1
nxp:NX_P61160-2	399	0	45329.5	18	95	8.24944e-05	0.4236	145.16	ACTR2	Actin-related protein 2 isoform Iso 2
nxp:NX_P61160-1	394	9	44714.2	24	127	0.000111682	0.5025	197.751	ACTR2	Actin-related protein 2 isoform Iso 1
nxp:NX_P61158-1	418	22	47323	24	128	0.000106098	0.7273	218.437	ACTR3	Actin-related protein 3 isoform Iso 1
nxp:NX_P61106-1	215	4	23863.9	4	10	1.61152e-05	0.2233	14.103	RAB14	Ras-related protein Rab-14 isoform Iso 1
nxp:NX_P61088-1	152	0	17109	3	6	1.36767e-05	0.1974	8.1486	UBE2N	Ubiquitin-conjugating enzyme E2 N isoform Iso 1
nxp:NX_P61026-1	200	5	22508.6	5	18	3.11829e-05	0.195	23.2958	RAB10	Ras-related protein Rab-10 isoform Iso 1
nxp:NX_P61019-2	188	1	20816.3	4	8	1.47437e-05	0.2074	12.6292	RAB2A	Ras-related protein Rab-2A isoform Iso 2
nxp:NX_P61019-1	212	0	23512.8	3	6	9.80594e-06	0.184	9.8946	RAB2A	Ras-related protein Rab-2A isoform Iso 1
nxp:NX_P60981-1	165	10	18475.5	11	54	0.000113392	0.5212	89.7659	DSTN	Destrin isoform Iso 1
nxp:NX_P60953-2	191	2	21227	11	223	0.000404525	0.5183	378.933	CDC42	Cell division control protein 42 homolog isoform Iso 2
nxp:NX_P60953-1	191	4	21278.9	9	206	0.000373687	0.377	372.181	CDC42	Cell division control protein 42 homolog isoform Iso 1
nxp:NX_P60900-2	227	1	25255.8	6	14	2.13686e-05	0.3568	22.6604	PSMA6	Proteasome subunit alpha type-6 isoform Iso 2
nxp:NX_P60900-1	246	2	27363.8	7	16	2.25351e-05	0.3333	23.5702	PSMA6	Proteasome subunit alpha type-6 isoform Iso 1
nxp:NX_P60891-1	318	2	34793.9	2	4	4.3582e-06	0.1069	6.9192	PRPS1	Ribose-phosphate pyrophosphokinase 1 isoform Iso 1
nxp:NX_P60842-2	347	0	39505.1	3	12	1.19819e-05	0.1037	18.0304	EIF4A1	Eukaryotic initiation factor 4A-I isoform Iso 2
nxp:NX_P60842-1	406	0	46106.5	4	20	1.70678e-05	0.1133	27.6982	EIF4A1	Eukaryotic initiation factor 4A-I isoform Iso 1
nxp:NX_P60763-1	192	0	21347	9	170	0.000306776	0.401	291.204	RAC3	Ras-related C3 botulinum toxin substrate 3 isoform Iso 1
nxp:NX_P60709-1	375	102	41691.7	276	7960	0.00735454	0.9493	15639.5	ACTB	Actin, cytoplasmic 1 isoform Iso 1
nxp:NX_P60660-2	151	6	16932.1	18	168	0.000385484	0.7748	273.722	MYL6	Myosin light polypeptide 6 isoform Smooth muscle
nxp:NX_P60660-1	151	0	16901.1	15	150	0.000344182	0.596	245.041	MYL6	Myosin light polypeptide 6 isoform Non-muscle
nxp:NX_P60174-3	286	46	30753.7	46	562	0.000680839	0.8042	1073.92	TPI1	Triosephosphate isomerase isoform Iso 2
nxp:NX_P60022-1	68	3	7396.6	3	16	8.15239e-05	0.4853	24.0536	DEFB1	Beta-defensin 1 isoform Iso 1
nxp:NX_P59998-3	187	0	21556.2	7	46	8.52295e-05	0.4973	78.5561	ARPC4	Actin-related protein 2/3 complex subunit 4 isoform Iso 3
nxp:NX_P59998-2	625	0	71654.8	4	28	1.55222e-05	0.08	50.1341	ARPC4	Actin-related protein 2/3 complex subunit 4 isoform Iso 2
nxp:NX_P59998-1	168	2	19636.3	8	50	0.000103118	0.5536	84.2163	ARPC4	Actin-related protein 2/3 complex subunit 4 isoform Iso 1
nxp:NX_P59901-1	499	0	55111.8	1	2	1.38868e-06	0.0381	5.0534	LILRA4	Leukocyte immunoglobulin-like receptor subfamily A member 4 isoform Iso 1
nxp:NX_P59666-1	94	35	10220.2	46	5834	0.0215037	0.7553	10290.9	DEFA3	Neutrophil defensin 3 isoform Iso 1
nxp:NX_P59665-1	94	8	10176.2	33	5606	0.0206633	0.734	9792.06	DEFA1	Neutrophil defensin 1 isoform Iso 1
nxp:NX_P58876-1	126	1	13909.6	54	3301	0.00907714	0.8333	6151.99	H2BC5	Histone H2B type 1-D isoform Iso 1
nxp:NX_P58546-1	118	5	12868.6	5	25	7.34061e-05	0.4492	45.1674	MTPN	Myotrophin isoform Iso 1
nxp:NX_P57721-5	351	0	37299.3	1	5	4.93556e-06	0.0313	7.1001	PCBP3	Poly(rC)-binding protein 3 isoform Iso 5
nxp:NX_P57721-4	370	0	39294.2	1	5	4.68212e-06	0.0297	7.1001	PCBP3	Poly(rC)-binding protein 3 isoform Iso 4
nxp:NX_P57721-3	346	0	36903.9	1	5	5.00689e-06	0.0318	7.1001	PCBP3	Poly(rC)-binding protein 3 isoform Iso 3
nxp:NX_P57721-2	345	0	36775.9	1	5	5.0214e-06	0.0319	7.1001	PCBP3	Poly(rC)-binding protein 3 isoform Iso 2
nxp:NX_P57721-1	371	0	39422.3	1	5	4.6695e-06	0.0296	7.1001	PCBP3	Poly(rC)-binding protein 3 isoform Iso 1
nxp:NX_P57053-1	126	0	13917.6	51	3180	0.00874441	0.7778	5999.99	H2BS1	Histone H2B type F-S isoform Iso 1
nxp:NX_P56537-1	245	1	26564.2	1	2	2.82838e-06	0.0735	5.1292	EIF6	Eukaryotic translation initiation factor 6 isoform Iso 1
nxp:NX_P56385-1	69	2	7910.3	2	4	2.00856e-05	0.2464	5.5692	ATP5ME	ATP synthase subunit e, mitochondrial isoform Iso 1
nxp:NX_P55854-2	141	0	15739.9	1	31	7.61757e-05	0.0851	48.9574	SUMO3	Small ubiquitin-related modifier 3 isoform Iso 2
nxp:NX_P55854-1	103	0	11611.7	1	31	0.000104279	0.1165	48.9574	SUMO3	Small ubiquitin-related modifier 3 isoform Iso 1
nxp:NX_P55795-1	449	0	49214.3	2	6	4.62998e-06	0.0579	9.767	HNRNPH2	Heterogeneous nuclear ribonucleoprotein H2 isoform Iso 1
nxp:NX_P55786-2	839	0	94437.9	2	4	1.65186e-06	0.0286	7.3454	NPEPPS	Puromycin-sensitive aminopeptidase isoform Iso 2
nxp:NX_P55786-1	919	1	103193	3	6	2.26209e-06	0.0381	9.4796	NPEPPS	Puromycin-sensitive aminopeptidase isoform Iso 1
nxp:NX_P55259-4	387	1	42993.3	5	14	1.2534e-05	0.1525	22.6482	GP2	Pancreatic secretory granule membrane major glycoprotein GP2 isoform Iso 2
nxp:NX_P55259-3	534	2	59071.4	9	38	2.46556e-05	0.176	61.3682	GP2	Pancreatic secretory granule membrane major glycoprotein GP2 isoform Alpha
nxp:NX_P55259-2	390	0	43345.5	4	12	1.06608e-05	0.1359	20.0592	GP2	Pancreatic secretory granule membrane major glycoprotein GP2 isoform Beta
nxp:NX_P55259-1	537	0	59423.6	8	31	2.00014e-05	0.1695	52.915	GP2	Pancreatic secretory granule membrane major glycoprotein GP2 isoform Iso 1
nxp:NX_P55209-3	323	0	37303.3	1	2	2.14537e-06	0.0557	5.9394	NAP1L1	Nucleosome assembly protein 1-like 1 isoform Iso 3
nxp:NX_P55209-2	368	0	42717	1	2	1.88303e-06	0.0489	5.9394	NAP1L1	Nucleosome assembly protein 1-like 1 isoform Iso 2
nxp:NX_P55209-1	391	0	45327.9	1	2	1.77226e-06	0.046	5.9394	NAP1L1	Nucleosome assembly protein 1-like 1 isoform Iso 1
nxp:NX_P55160-1	1127	1	128053	1	2	6.14865e-07	0.0106	4.1158	NCKAP1L	Nck-associated protein 1-like isoform Iso 1
nxp:NX_P55145-1	182	5	20668.8	5	28	5.33041e-05	0.3791	46.2228	MANF	Mesencephalic astrocyte-derived neurotrophic factor isoform Iso 1
nxp:NX_P55072-1	806	25	89247.7	25	72	3.09508e-05	0.3065	116.062	VCP	Transitional endoplasmic reticulum ATPase isoform Iso 1
nxp:NX_P55064-1	265	2	28256.1	2	4	5.22984e-06	0.0642	5.8008	AQP5	Aquaporin-5 isoform Iso 1
nxp:NX_P55058-3	398	1	44089.2	10	38	3.30807e-05	0.2638	73.4922	PLTP	Phospholipid transfer protein isoform Iso 3
nxp:NX_P55058-2	441	0	49222.9	10	36	2.82838e-05	0.2381	71.0506	PLTP	Phospholipid transfer protein isoform Iso 2
nxp:NX_P55058-1	493	3	54686.5	13	44	3.09229e-05	0.2576	83.4662	PLTP	Phospholipid transfer protein isoform Iso 1
nxp:NX_P54920-1	295	4	33193.3	4	8	9.39598e-06	0.1661	11.7332	NAPA	Alpha-soluble NSF attachment protein isoform Iso 1
nxp:NX_P54819-5	224	0	24614.7	5	15	2.32016e-05	0.2321	26.2873	AK2	Adenylate kinase 2, mitochondrial isoform Iso 5
nxp:NX_P54819-4	130	0	14681.7	4	14	3.73129e-05	0.2692	24.4022	AK2	Adenylate kinase 2, mitochondrial isoform Iso 4
nxp:NX_P54819-3	202	1	22232.8	6	16	2.74437e-05	0.3416	27.3626	AK2	Adenylate kinase 2, mitochondrial isoform Iso 3
nxp:NX_P54819-2	232	0	25580.3	5	15	2.24015e-05	0.2241	26.2873	AK2	Adenylate kinase 2, mitochondrial isoform Iso 2
nxp:NX_P54819-1	239	0	26442.8	5	15	2.17454e-05	0.2176	26.2873	AK2	Adenylate kinase 2, mitochondrial isoform Iso 1
nxp:NX_P54802-1	743	2	82195.6	2	4	1.86528e-06	0.0444	6.8446	NAGLU	Alpha-N-acetylglucosaminidase isoform Iso 1
nxp:NX_P54727-1	409	13	43126.6	13	32	2.71082e-05	0.3447	57.3766	RAD23B	UV excision repair protein RAD23 homolog B isoform Iso 1
nxp:NX_P54652-1	639	0	69959.9	17	189	0.000102479	0.2081	330.056	HSPA2	Heat shock-related 70 kDa protein 2 isoform Iso 1
nxp:NX_P54578-3	483	0	54716.4	1	2	1.43469e-06	0.0269	5.1822	USP14	Ubiquitin carboxyl-terminal hydrolase 14 isoform Iso 3
nxp:NX_P54578-2	459	0	52334.3	1	2	1.5097e-06	0.0283	5.1822	USP14	Ubiquitin carboxyl-terminal hydrolase 14 isoform Iso 2
nxp:NX_P54578-1	494	0	56015	1	2	1.40274e-06	0.0263	5.1822	USP14	Ubiquitin carboxyl-terminal hydrolase 14 isoform Iso 1
nxp:NX_P54108-3	268	0	30078.2	22	199	0.000257272	0.6231	375.561	CRISP3	Cysteine-rich secretory protein 3 isoform Iso 3
nxp:NX_P54108-2	258	7	29027.8	24	213	0.000286045	0.6473	394.913	CRISP3	Cysteine-rich secretory protein 3 isoform Iso 2
nxp:NX_P53999-1	127	2	14368.4	2	2	5.45632e-06	0.189	3.7313	SUB1	Activated RNA polymerase II transcriptional coactivator p15 isoform Iso 1
nxp:NX_P53675-2	1583	0	180163	4	10	2.18873e-06	0.0227	15.9714	CLTCL1	Clathrin heavy chain 2 isoform Iso 2
nxp:NX_P53675-1	1640	0	186892	4	10	2.11266e-06	0.022	15.9714	CLTCL1	Clathrin heavy chain 2 isoform Iso 1
nxp:NX_P53634-1	463	30	51802.3	30	148	0.000110753	0.4881	261.382	CTSC	Dipeptidyl peptidase 1 isoform Iso 1
nxp:NX_P53621-2	1233	0	139217	2	6	1.68602e-06	0.0114	10.3604	COPA	Coatomer subunit alpha isoform Iso 2
nxp:NX_P53621-1	1224	0	138240	2	6	1.69841e-06	0.0114	10.3604	COPA	Coatomer subunit alpha isoform Iso 1
nxp:NX_P53396-3	830	1	91022.8	6	14	5.84418e-06	0.0807	16.3466	ACLY	ATP-citrate synthase isoform Iso 3
nxp:NX_P53396-2	1091	0	119677	6	20	6.35154e-06	0.0495	26.9772	ACLY	ATP-citrate synthase isoform Iso 2
nxp:NX_P53396-1	1101	0	120744	6	20	6.29385e-06	0.049	26.9772	ACLY	ATP-citrate synthase isoform Iso 1
nxp:NX_P53004-1	296	2	33389.3	2	4	4.68212e-06	0.1318	5.809	BLVRA	Biliverdin reductase A isoform Iso 1
nxp:NX_P52907-1	286	14	32884.3	15	103	0.00012478	0.528	168.221	CAPZA1	F-actin-capping protein subunit alpha-1 isoform Iso 1
nxp:NX_P52790-1	923	15	98944.1	15	78	2.92797e-05	0.2113	125.393	HK3	Hexokinase-3 isoform Iso 1
nxp:NX_P52597-1	415	1	45624.8	3	18	1.50279e-05	0.106	35.6148	HNRNPF	Heterogeneous nuclear ribonucleoprotein F isoform Iso 1
nxp:NX_P52566-1	201	48	22955.6	49	327	0.000563671	0.9005	570.932	ARHGDIB	Rho GDP-dissociation inhibitor 2 isoform Iso 1
nxp:NX_P52565-2	160	5	18203.3	11	44	9.52811e-05	0.5375	90.8362	ARHGDIA	Rho GDP-dissociation inhibitor 1 isoform Iso 2
nxp:NX_P52565-1	204	7	23174.7	17	66	0.000112095	0.5588	130.56	ARHGDIA	Rho GDP-dissociation inhibitor 1 isoform Iso 1
nxp:NX_P52209-1	483	35	53087.9	35	400	0.000286937	0.588	746.637	PGD	6-phosphogluconate dehydrogenase, decarboxylating isoform Iso 1
nxp:NX_P51993-2	364	0	42146	2	4	3.80744e-06	0.0797	6.9606	FUT6	4-galactosyl-N-acetylglucosaminide 3-alpha-L-fucosyltransferase FUT6 isoform Iso 2
nxp:NX_P51993-1	359	0	41814.8	2	4	3.86046e-06	0.0808	6.9606	FUT6	4-galactosyl-N-acetylglucosaminide 3-alpha-L-fucosyltransferase FUT6 isoform Iso 1
nxp:NX_P51884-1	338	12	38386.8	12	70	7.17555e-05	0.3047	114.999	LUM	Lumican isoform Iso 1
nxp:NX_P51858-3	256	0	28228.9	12	61	8.25589e-05	0.4492	116.791	HDGF	Hepatoma-derived growth factor isoform Iso 3
nxp:NX_P51858-2	233	5	25504.2	14	77	0.000114501	0.5064	137.62	HDGF	Hepatoma-derived growth factor isoform Iso 2
nxp:NX_P51858-1	240	3	26753.9	14	79	0.000114049	0.5542	144.352	HDGF	Hepatoma-derived growth factor isoform Iso 1
nxp:NX_P51692-1	787	0	89791.6	2	10	4.4025e-06	0.0191	12.06	STAT5B	Signal transducer and activator of transcription 5B isoform Iso 1
nxp:NX_P51572-2	313	13	34712.3	13	48	5.31338e-05	0.2843	95.9205	BCAP31	B-cell receptor-associated protein 31 isoform Iso 2
nxp:NX_P51149-1	207	6	23456.8	6	41	6.86258e-05	0.2899	77.4687	RAB7A	Ras-related protein Rab-7a isoform Iso 1
nxp:NX_P51148-2	249	2	27000.5	2	10	1.39147e-05	0.0964	13.0122	RAB5C	Ras-related protein Rab-5C isoform Iso 2
nxp:NX_P50995-1	505	14	54337.1	14	66	4.52821e-05	0.297	113.174	ANXA11	Annexin A11 isoform Iso 1
nxp:NX_P50991-2	509	0	54667.1	5	12	8.16841e-06	0.1218	21.5254	CCT4	T-complex protein 1 subunit delta isoform Iso 2
nxp:NX_P50991-1	539	1	57869.8	6	14	8.99939e-06	0.1336	25.0944	CCT4	T-complex protein 1 subunit delta isoform Iso 1
nxp:NX_P50990-3	475	1	51535.3	13	30	2.18827e-05	0.2484	47.1362	CCT8	T-complex protein 1 subunit theta isoform Iso 3
nxp:NX_P50990-2	529	0	57590.4	13	32	2.09589e-05	0.2287	51.7214	CCT8	T-complex protein 1 subunit theta isoform Iso 2
nxp:NX_P50990-1	548	0	59564.5	13	32	2.02322e-05	0.2208	51.7214	CCT8	T-complex protein 1 subunit theta isoform Iso 1
nxp:NX_P50552-1	380	29	39787.1	29	210	0.000191474	0.5763	391.878	VASP	Vasodilator-stimulated phosphoprotein isoform Iso 1
nxp:NX_P50502-1	369	0	41287.5	6	14	1.31455e-05	0.1843	27.1164	ST13	Hsc70-interacting protein isoform Iso 1
nxp:NX_P50395-2	400	7	45572.2	24	98	8.48868e-05	0.565	165.007	GDI2	Rab GDP dissociation inhibitor beta isoform Iso 2
nxp:NX_P50395-1	445	3	50612.9	27	100	7.78599e-05	0.5596	174.209	GDI2	Rab GDP dissociation inhibitor beta isoform Iso 1
nxp:NX_P50238-1	77	1	8509	1	6	2.69982e-05	0.3636	13.1918	CRIP1	Cysteine-rich protein 1 isoform Iso 1
nxp:NX_P50148-1	359	3	42097.3	5	12	1.15814e-05	0.1476	18.3528	GNAQ	Guanine nucleotide-binding protein G(q) subunit alpha isoform Iso 1
nxp:NX_P49913-1	170	18	19271.1	18	322	0.000656267	0.4588	557.519	CAMP	Cathelicidin antimicrobial peptide isoform Iso 1
nxp:NX_P49788-2	228	2	25777.6	7	38	5.77461e-05	0.364	56.8138	RARRES1	Retinoic acid receptor responder protein 1 isoform Iso 1
nxp:NX_P49788-1	294	2	33246.2	9	38	4.47827e-05	0.4116	59.2428	RARRES1	Retinoic acid receptor responder protein 1 isoform Iso 2
nxp:NX_P49748-3	678	0	72862.7	2	4	2.04411e-06	0.0369	6.7942	ACADVL	Very long-chain specific acyl-CoA dehydrogenase, mitochondrial isoform Iso 3
nxp:NX_P49748-2	633	0	67997.1	2	4	2.18943e-06	0.0395	6.7942	ACADVL	Very long-chain specific acyl-CoA dehydrogenase, mitochondrial isoform Iso 2
nxp:NX_P49748-1	655	1	70327.4	3	6	3.17383e-06	0.055	9.6364	ACADVL	Very long-chain specific acyl-CoA dehydrogenase, mitochondrial isoform Iso 1
nxp:NX_P49720-1	205	3	22915.4	3	6	1.01408e-05	0.2146	8.3964	PSMB3	Proteasome subunit beta type-3 isoform Iso 1
nxp:NX_P49454-1	3114	1	357288	1	6	6.67585e-07	0.0026	6.5982	CENPF	Centromere protein F isoform Iso 1
nxp:NX_P49448-1	558	0	61377.4	3	6	3.72556e-06	0.086	9.7286	GLUD2	Glutamate dehydrogenase 2, mitochondrial isoform Iso 1
nxp:NX_P49368-2	507	0	56377.2	7	16	1.09342e-05	0.1499	26.8024	CCT3	T-complex protein 1 subunit gamma isoform Iso 2
nxp:NX_P49368-1	545	0	60477.3	7	16	1.01718e-05	0.1394	26.8024	CCT3	T-complex protein 1 subunit gamma isoform Iso 1
nxp:NX_P49327-1	2511	4	273236	4	8	1.10387e-06	0.0235	12.6138	FASN	Fatty acid synthase isoform Iso 1
nxp:NX_P49189-3	518	2	56237.4	2	4	2.6755e-06	0.0502	6.3442	ALDH9A1	4-trimethylaminobutyraldehyde dehydrogenase isoform Iso 3
nxp:NX_P48960-3	786	0	86552.9	3	6	2.64486e-06	0.0573	10.357	ADGRE5	Adhesion G protein-coupled receptor E5 isoform Iso 3
nxp:NX_P48960-2	742	0	81671.7	3	6	2.8017e-06	0.0606	10.357	ADGRE5	Adhesion G protein-coupled receptor E5 isoform Iso 2
nxp:NX_P48960-1	835	0	91791.1	3	6	2.48965e-06	0.0539	10.357	ADGRE5	Adhesion G protein-coupled receptor E5 isoform Iso 1
nxp:NX_P48741-1	367	3	40201.6	8	69	6.51414e-05	0.1771	120.234	HSPA7	Putative heat shock 70 kDa protein 7 isoform Iso 1
nxp:NX_P48668-1	564	0	59970.3	45	620	0.000380879	0.6011	1039.07	KRT6C	Keratin, type II cytoskeletal 6C isoform Iso 1
nxp:NX_P48643-2	448	2	49476.8	4	8	6.18708e-06	0.1228	14.495	CCT5	T-complex protein 1 subunit epsilon isoform Iso 2
nxp:NX_P48643-1	541	0	59614.8	2	4	2.56175e-06	0.0591	9.0384	CCT5	T-complex protein 1 subunit epsilon isoform Iso 1
nxp:NX_P48637-2	363	0	40305.8	4	14	1.33627e-05	0.124	23.3244	GSS	Glutathione synthetase isoform Iso 2
nxp:NX_P48637-1	474	2	52334.2	6	18	1.31573e-05	0.1392	28.927	GSS	Glutathione synthetase isoform Iso 1
nxp:NX_P48595-1	397	1	45355.9	1	6	5.23642e-06	0.0227	10.9064	SERPINB10	Serpin B10 isoform Iso 1
nxp:NX_P48594-1	390	1	44807.5	23	118	0.000104831	0.3897	222.158	SERPINB4	Serpin B4 isoform Iso 1
nxp:NX_P48448-1	385	0	42589.5	2	19	1.70988e-05	0.1039	28.0984	ALDH3B2	Aldehyde dehydrogenase family 3 member B2 isoform Iso 1
nxp:NX_P48304-1	166	0	18634.7	1	4	8.34883e-06	0.0663	4.9354	REG1B	Lithostathine-1-beta isoform Iso 1
nxp:NX_P47914-1	159	2	17723.1	2	12	2.61492e-05	0.0943	14.944	RPL29	60S ribosomal protein L29 isoform Iso 1
nxp:NX_P47756-2	272	5	30591.4	20	106	0.000135024	0.6507	176.183	CAPZB	F-actin-capping protein subunit beta isoform Iso 2
nxp:NX_P47756-1	277	0	31312.8	16	90	0.000112574	0.5379	153.929	CAPZB	F-actin-capping protein subunit beta isoform Iso 1
nxp:NX_P47755-2	172	0	19744.7	3	20	4.0288e-05	0.1686	30.3046	CAPZA2	F-actin-capping protein subunit alpha-2 isoform Iso 2
nxp:NX_P47755-1	286	0	32910.6	4	24	2.9075e-05	0.1259	35.5896	CAPZA2	F-actin-capping protein subunit alpha-2 isoform Iso 1
nxp:NX_P46976-3	279	0	31428.8	1	2	2.4837e-06	0.0466	4.4046	GYG1	Glycogenin-1 isoform GN-1S
nxp:NX_P46976-2	333	0	37436.7	1	2	2.08094e-06	0.039	4.4046	GYG1	Glycogenin-1 isoform GN-1
nxp:NX_P46976-1	350	0	39340.6	1	2	1.97987e-06	0.0371	4.4046	GYG1	Glycogenin-1 isoform GN-1L
nxp:NX_P46940-1	1657	51	189116	51	184	3.84742e-05	0.3705	325.53	IQGAP1	Ras GTPase-activating-like protein IQGAP1 isoform Iso 1
nxp:NX_P46926-2	212	0	24013.5	2	4	6.53729e-06	0.0991	5.9294	GNPDA1	Glucosamine-6-phosphate isomerase 1 isoform Iso 2
nxp:NX_P46926-1	289	0	32629.6	2	4	4.79552e-06	0.0727	5.9294	GNPDA1	Glucosamine-6-phosphate isomerase 1 isoform Iso 1
nxp:NX_P46782-1	204	2	22844	2	4	6.79366e-06	0.0833	6.2788	RPS5	40S ribosomal protein S5 isoform Iso 1
nxp:NX_P46779-5	87	0	10063.3	1	4	1.593e-05	0.1264	6.2654	RPL28	60S ribosomal protein L28 isoform Iso 5
nxp:NX_P46779-4	69	0	7865.2	1	4	2.00856e-05	0.1594	6.2654	RPL28	60S ribosomal protein L28 isoform Iso 4
nxp:NX_P46779-3	169	0	19117.9	1	4	8.20063e-06	0.0651	6.2654	RPL28	60S ribosomal protein L28 isoform Iso 3
nxp:NX_P46779-2	163	0	18400.4	1	4	8.50249e-06	0.0675	6.2654	RPL28	60S ribosomal protein L28 isoform Iso 2
nxp:NX_P46779-1	137	0	15719.7	1	4	1.01161e-05	0.0803	6.2654	RPL28	60S ribosomal protein L28 isoform Iso 1
nxp:NX_P45984-4	424	0	48262.2	1	6	4.90297e-06	0.0165	8.6384	MAPK9	Mitogen-activated protein kinase 9 isoform Beta-2
nxp:NX_P45984-3	382	0	44176.4	1	6	5.44204e-06	0.0183	8.6384	MAPK9	Mitogen-activated protein kinase 9 isoform Beta-1
nxp:NX_P45984-2	382	0	44004.3	1	6	5.44204e-06	0.0183	8.6384	MAPK9	Mitogen-activated protein kinase 9 isoform Alpha-1
nxp:NX_P45984-1	424	0	48090.1	1	6	4.90297e-06	0.0165	8.6384	MAPK9	Mitogen-activated protein kinase 9 isoform Alpha-2
nxp:NX_P45880-3	294	0	31528.5	2	4	4.71397e-06	0.1054	6.7488	VDAC2	Voltage-dependent anion-selective channel protein 2 isoform Iso 3
nxp:NX_P45880-1	309	0	33332.5	2	4	4.48513e-06	0.1003	6.7488	VDAC2	Voltage-dependent anion-selective channel protein 2 isoform Iso 1
nxp:NX_P43652-1	599	28	69006	28	193	0.000111636	0.4725	309.637	AFM	Afamin isoform Iso 1
nxp:NX_P43490-1	491	29	55468.6	29	153	0.000107965	0.613	241.519	NAMPT	Nicotinamide phosphoribosyltransferase isoform Iso 1
nxp:NX_P43487-2	200	2	23206.5	2	4	6.92953e-06	0.105	7.7062	RANBP1	Ran-specific GTPase-activating protein isoform Iso 2
nxp:NX_P43353-2	431	4	47634.4	14	116	9.32513e-05	0.355	166.648	ALDH3B1	Aldehyde dehydrogenase family 3 member B1 isoform Iso 2
nxp:NX_P43353-1	468	1	51788.5	14	118	8.73595e-05	0.3526	177.48	ALDH3B1	Aldehyde dehydrogenase family 3 member B1 isoform Iso 1
nxp:NX_P43304-1	727	3	80783.6	3	6	2.8595e-06	0.0358	9.2002	GPD2	Glycerol-3-phosphate dehydrogenase, mitochondrial isoform Iso 1
nxp:NX_P43251-3	545	0	61272.3	1	2	1.27147e-06	0.044	6.8876	BTD	Biotinidase isoform Iso 3
nxp:NX_P43251-2	545	0	61452.5	1	2	1.27147e-06	0.044	6.8876	BTD	Biotinidase isoform Iso 2
nxp:NX_P43251-1	543	0	61075.2	1	2	1.27616e-06	0.0442	6.8876	BTD	Biotinidase isoform Iso 1
nxp:NX_P42785-2	517	0	58044.2	4	10	6.70168e-06	0.1122	18.7652	PRCP	Lysosomal Pro-X carboxypeptidase isoform Iso 2
nxp:NX_P42785-1	496	3	55745.9	7	16	1.11767e-05	0.1371	28.1482	PRCP	Lysosomal Pro-X carboxypeptidase isoform Iso 1
nxp:NX_P42574-1	277	2	31569.5	2	4	5.00327e-06	0.0903	7.273	CASP3	Caspase-3 isoform Iso 1
nxp:NX_P42331-6	639	0	72438.2	2	4	2.16887e-06	0.0344	8.6604	ARHGAP25	Rho GTPase-activating protein 25 isoform Iso 6
nxp:NX_P42331-5	606	0	68955.7	2	4	2.28697e-06	0.0363	8.6604	ARHGAP25	Rho GTPase-activating protein 25 isoform Iso 5
nxp:NX_P42331-3	638	0	72367.2	2	4	2.17227e-06	0.0345	8.6604	ARHGAP25	Rho GTPase-activating protein 25 isoform Iso 3
nxp:NX_P42331-1	645	0	73370.8	2	4	2.14869e-06	0.0341	8.6604	ARHGAP25	Rho GTPase-activating protein 25 isoform Iso 1
nxp:NX_P42330-1	323	0	36811.8	1	6	6.4361e-06	0.0588	18.7648	AKR1C3	Aldo-keto reductase family 1 member C3 isoform Iso 1
nxp:NX_P42229-2	764	0	86876.4	2	10	4.53503e-06	0.0196	12.06	STAT5A	Signal transducer and activator of transcription 5A isoform Iso 2
nxp:NX_P42229-1	794	0	90572.3	2	10	4.36369e-06	0.0189	12.06	STAT5A	Signal transducer and activator of transcription 5A isoform Iso 1
nxp:NX_P42224-1	750	6	87261.5	6	16	7.3915e-06	0.1027	28.7004	STAT1	Signal transducer and activator of transcription 1-alpha/beta isoform Alpha
nxp:NX_P42167-3	248	2	27353.4	5	29	4.05154e-05	0.25	53.4394	TMPO	Lamina-associated polypeptide 2, isoforms beta/gamma isoform Zeta
nxp:NX_P42167-2	345	1	38696.3	5	26	2.61113e-05	0.2145	44.7101	TMPO	Lamina-associated polypeptide 2, isoforms beta/gamma isoform Gamma
nxp:NX_P42167-1	454	0	50621.4	4	22	1.67896e-05	0.1322	40.2117	TMPO	Lamina-associated polypeptide 2, isoforms beta/gamma isoform Beta
nxp:NX_P42166-1	694	0	75427.6	4	22	1.09834e-05	0.0865	40.2117	TMPO	Lamina-associated polypeptide 2, isoform alpha isoform Alpha
nxp:NX_P41222-1	190	5	20997.3	5	10	1.82356e-05	0.2263	16.5144	PTGDS	Prostaglandin-H2 D-isomerase isoform Iso 1
nxp:NX_P41219-2	471	0	53728.5	6	91	6.69413e-05	0.0679	140.473	PRPH	Peripherin isoform Iso 2
nxp:NX_P41219-1	470	0	53600.4	6	91	6.70838e-05	0.0681	140.473	PRPH	Peripherin isoform Iso 1
nxp:NX_P41218-1	407	38	45789.2	38	182	0.000154935	0.543	282.434	MNDA	Myeloid cell nuclear differentiation antigen isoform Iso 1
nxp:NX_P41208-1	172	3	19707.9	3	6	1.20864e-05	0.2442	10.785	CETN2	Centrin-2 isoform Iso 1
nxp:NX_P40939-1	763	3	82928.9	3	6	2.72459e-06	0.0485	8.6556	HADHA	Trifunctional enzyme subunit alpha, mitochondrial isoform Iso 1
nxp:NX_P40926-2	296	2	30837.2	13	30	3.51159e-05	0.5135	54.4064	MDH2	Malate dehydrogenase, mitochondrial isoform Iso 2
nxp:NX_P40926-1	338	2	35462.7	13	30	3.07524e-05	0.4497	54.9666	MDH2	Malate dehydrogenase, mitochondrial isoform Iso 1
nxp:NX_P40925-3	352	0	38585.1	11	32	3.14979e-05	0.2301	50.5269	MDH1	Malate dehydrogenase, cytoplasmic isoform Iso 3
nxp:NX_P40925-1	334	1	36385	12	34	3.52701e-05	0.2814	52.6643	MDH1	Malate dehydrogenase, cytoplasmic isoform Iso 1
nxp:NX_P40306-1	273	2	28900.1	2	4	5.07658e-06	0.1062	6.899	PSMB10	Proteasome subunit beta type-10 isoform Iso 1
nxp:NX_P40227-2	486	1	53237.1	3	6	4.27749e-06	0.1193	7.5386	CCT6A	T-complex protein 1 subunit zeta isoform Iso 2
nxp:NX_P40227-1	531	0	57969.6	2	4	2.60999e-06	0.0659	5.1052	CCT6A	T-complex protein 1 subunit zeta isoform Iso 1
nxp:NX_P40199-1	344	2	37153.7	3	10	1.0072e-05	0.1424	19.312	CEACAM6	Carcinoembryonic antigen-related cell adhesion molecule 6 isoform Iso 1
nxp:NX_P40123-1	477	0	52772.8	1	4	2.90546e-06	0.0126	7.0136	CAP2	Adenylyl cyclase-associated protein 2 isoform Iso 1
nxp:NX_P40121-2	333	3	36815.7	16	154	0.000160232	0.4745	262.293	CAPG	Macrophage-capping protein isoform Iso 2
nxp:NX_P40121-1	348	2	38456.5	18	152	0.000151335	0.5287	260.737	CAPG	Macrophage-capping protein isoform Iso 1
nxp:NX_P39687-1	249	7	28550.3	7	14	1.94806e-05	0.3173	23.891	ANP32A	Acidic leucine-rich nuclear phosphoprotein 32 family member A isoform Iso 1
nxp:NX_P39019-1	145	1	16032.5	1	2	4.77899e-06	0.1034	4.4962	RPS19	40S ribosomal protein S19 isoform Iso 1
nxp:NX_P38646-1	679	5	73616.8	7	22	1.1226e-05	0.1016	33.8444	HSPA9	Stress-70 protein, mitochondrial isoform Iso 1
nxp:NX_P38159-3	196	0	22139.4	4	10	1.76774e-05	0.199	17.5043	RBMX	RNA-binding motif protein, X chromosome isoform Iso 3
nxp:NX_P38159-2	378	0	40803.6	2	2	1.83321e-06	0.0556	2.9821	RBMX	RNA-binding motif protein, X chromosome isoform Iso 2
nxp:NX_P38159-1	391	0	42288.3	4	10	8.86129e-06	0.0997	17.5043	RBMX	RNA-binding motif protein, X chromosome isoform Iso 1
nxp:NX_P38117-2	346	0	37393	2	4	4.00551e-06	0.052	5.6522	ETFB	Electron transfer flavoprotein subunit beta isoform Iso 2
nxp:NX_P38117-1	255	0	27808.1	2	4	5.43493e-06	0.0706	5.6522	ETFB	Electron transfer flavoprotein subunit beta isoform Iso 1
nxp:NX_P37840-2	112	1	11346.9	3	8	2.47483e-05	0.4107	11.7582	SNCA	Alpha-synuclein isoform 2-4
nxp:NX_P37840-1	140	0	14433.2	3	6	1.4849e-05	0.3286	8.9838	SNCA	Alpha-synuclein isoform Iso 1
nxp:NX_P37837-1	337	41	37498.5	41	364	0.000374236	0.6647	606.666	TALDO1	Transaldolase isoform Iso 1
nxp:NX_P37802-2	220	24	24420.3	24	137	0.00021576	0.6636	224.058	TAGLN2	Transgelin-2 isoform Iso 2
nxp:NX_P36980-2	243	5	27860.2	8	89	0.000126899	0.4774	147.515	CFHR2	Complement factor H-related protein 2 isoform Short
nxp:NX_P36980-1	270	0	30612.6	7	81	0.000103943	0.4296	138.715	CFHR2	Complement factor H-related protein 2 isoform Long
nxp:NX_P36955-1	418	32	46265.3	32	254	0.000210538	0.701	448.846	SERPINF1	Pigment epithelium-derived factor isoform Iso 1
nxp:NX_P36871-2	580	0	63732.3	2	4	2.38949e-06	0.0552	7.5238	PGM1	Phosphoglucomutase-1 isoform Iso 2
nxp:NX_P36871-1	562	1	61392.5	3	6	3.69904e-06	0.0836	10.597	PGM1	Phosphoglucomutase-1 isoform Iso 1
nxp:NX_P36507-1	400	2	44378	2	4	3.46477e-06	0.06	7.7286	MAP2K2	Dual specificity mitogen-activated protein kinase kinase 2 isoform Iso 1
nxp:NX_P36222-1	383	11	42580.4	11	48	4.34227e-05	0.3786	84.1202	CHI3L1	Chitinase-3-like protein 1 isoform Iso 1
nxp:NX_P35908-1	639	12	65375.2	43	731	0.000396361	0.6854	1262.69	KRT2	Keratin, type II cytoskeletal 2 epidermal isoform Iso 1
nxp:NX_P35900-1	424	0	48438.9	3	72	5.88357e-05	0.0283	116.06	KRT20	Keratin, type I cytoskeletal 20 isoform Iso 1
nxp:NX_P35754-1	106	7	11750.2	7	36	0.000117671	0.6321	71.1516	GLRX	Glutaredoxin-1 isoform Iso 1
nxp:NX_P35749-4	1938	1	223421	22	160	2.86049e-05	0.1017	274.559	MYH11	Myosin-11 isoform Iso 4
nxp:NX_P35749-3	1945	0	224172	21	158	2.81457e-05	0.0905	272.015	MYH11	Myosin-11 isoform Iso 3
nxp:NX_P35749-2	1979	0	227931	21	158	2.76621e-05	0.0889	272.015	MYH11	Myosin-11 isoform Iso 2
nxp:NX_P35749-1	1972	0	227181	21	158	2.77603e-05	0.0892	272.015	MYH11	Myosin-11 isoform Iso 1
nxp:NX_P35609-2	894	0	103836	18	122	4.7282e-05	0.1644	244.359	ACTN2	Alpha-actinin-2 isoform Iso 2
nxp:NX_P35609-1	894	0	103770	18	122	4.7282e-05	0.1644	244.359	ACTN2	Alpha-actinin-2 isoform Iso 1
nxp:NX_P35606-1	906	3	102404	3	6	2.29455e-06	0.0397	8.7408	COPB2	Coatomer subunit beta' isoform Iso 1
nxp:NX_P35580-5	1985	0	229870	20	135	2.35639e-05	0.0861	224.171	MYH10	Myosin-10 isoform Iso 5
nxp:NX_P35580-4	2007	0	232367	20	135	2.33056e-05	0.0852	224.171	MYH10	Myosin-10 isoform Iso 4
nxp:NX_P35580-3	1997	0	231208	20	135	2.34223e-05	0.0856	224.171	MYH10	Myosin-10 isoform Iso 3
nxp:NX_P35580-2	1992	0	230619	20	135	2.34811e-05	0.0858	224.171	MYH10	Myosin-10 isoform Iso 2
nxp:NX_P35580-1	1976	0	228840	20	135	2.36712e-05	0.0865	224.171	MYH10	Myosin-10 isoform Iso 1
nxp:NX_P35579-2	1382	46	159746	144	1226	0.000307366	0.5745	2278.9	MYH9	Myosin-9 isoform Iso 2
nxp:NX_P35579-1	1960	88	226374	221	1846	0.000326324	0.6342	3560.68	MYH9	Myosin-9 isoform Iso 1
nxp:NX_P35555-1	2871	3	312064	3	6	7.24089e-07	0.0098	7.1546	FBN1	Fibrillin-1 isoform Iso 1
nxp:NX_P35542-1	130	4	14719.3	4	12	3.19825e-05	0.2923	16.3361	SAA4	Serum amyloid A-4 protein isoform Iso 1
nxp:NX_P35527-1	623	5	62008.8	46	838	0.000466047	0.6742	1558.15	KRT9	Keratin, type I cytoskeletal 9 isoform Iso 1
nxp:NX_P35326-1	72	0	7941.7	2	100	0.000481218	0.3056	152.726	SPRR2A	Small proline-rich protein 2A isoform Iso 1
nxp:NX_P35325-1	72	0	7951.7	2	100	0.000481218	0.3056	152.726	SPRR2B	Small proline-rich protein 2B isoform Iso 1
nxp:NX_P35247-1	375	6	37686.7	6	32	2.9566e-05	0.208	76.2249	SFTPD	Pulmonary surfactant-associated protein D isoform Iso 1
nxp:NX_P35241-5	604	0	70986.6	23	256	0.000146851	0.2566	411.004	RDX	Radixin isoform Iso 5
nxp:NX_P35241-4	447	10	52628	25	238	0.000184477	0.2886	373.058	RDX	Radixin isoform Iso 4
nxp:NX_P35241-3	200	2	23380.1	4	32	5.54363e-05	0.135	56.9574	RDX	Radixin isoform Iso 3
nxp:NX_P35237-1	376	8	42576	8	24	2.21155e-05	0.25	39.6578	SERPINB6	Serpin B6 isoform Iso 1
nxp:NX_P34932-2	148	0	15661.6	2	6	1.40463e-05	0.2905	10.287	HSPA4	Heat shock 70 kDa protein 4 isoform Iso 2
nxp:NX_P34932-1	840	10	94253.2	12	36	1.4849e-05	0.181	61.2828	HSPA4	Heat shock 70 kDa protein 4 isoform Iso 1
nxp:NX_P34931-1	641	1	70313.3	28	239	0.000129186	0.312	439.129	HSPA1L	Heat shock 70 kDa protein 1-like isoform Iso 1
nxp:NX_P34096-1	147	9	16811.4	9	32	7.54235e-05	0.4898	52.1836	RNASE4	Ribonuclease 4 isoform Iso 1
nxp:NX_P33897-1	745	1	82866.5	1	2	9.30139e-07	0.0389	4.7726	ABCD1	ATP-binding cassette sub-family D member 1 isoform Iso 1
nxp:NX_P33778-1	126	1	13923.6	48	3257	0.00895615	0.8175	6076.66	H2BC3	Histone H2B type 1-B isoform Iso 1
nxp:NX_P33241-3	467	0	50339.5	19	75	5.5644e-05	0.3126	120.945	LSP1	Lymphocyte-specific protein 1 isoform Iso 3
nxp:NX_P33241-1	339	10	37151	24	100	0.000102205	0.5133	159.294	LSP1	Lymphocyte-specific protein 1 isoform Iso 1
nxp:NX_P33121-3	698	0	77839	2	8	3.97108e-06	0.0244	11.4238	ACSL1	Long-chain-fatty-acid--CoA ligase 1 isoform Iso 3
nxp:NX_P33121-2	688	0	76803.3	2	8	4.0288e-06	0.0247	11.4238	ACSL1	Long-chain-fatty-acid--CoA ligase 1 isoform Iso 2
nxp:NX_P33121-1	698	0	77874.9	2	8	3.97108e-06	0.0244	11.4238	ACSL1	Long-chain-fatty-acid--CoA ligase 1 isoform Iso 1
nxp:NX_P32942-1	547	5	59484.8	5	28	1.77355e-05	0.1024	41.4286	ICAM3	Intercellular adhesion molecule 3 isoform Iso 1
nxp:NX_P32320-1	146	12	16155.8	12	69	0.000163746	0.6575	118.514	CDA	Cytidine deaminase isoform Iso 1
nxp:NX_P32119-2	142	0	15790.3	5	22	5.36795e-05	0.3451	38.18	PRDX2	Peroxiredoxin-2 isoform Iso 2
nxp:NX_P32119-1	198	14	21860.2	21	104	0.000181988	0.7525	199.546	PRDX2	Peroxiredoxin-2 isoform Iso 1
nxp:NX_P31997-1	349	4	38112.1	6	79	7.84288e-05	0.212	139.908	CEACAM8	Carcinoembryonic antigen-related cell adhesion molecule 8 isoform Iso 1
nxp:NX_P31949-1	105	36	11714.8	36	647	0.00213496	0.8667	1296	S100A11	Protein S100-A11 isoform Iso 1
nxp:NX_P31948-3	519	5	59722	17	60	4.00551e-05	0.3468	90.8287	STIP1	Stress-induced-phosphoprotein 1 isoform Iso 3
nxp:NX_P31948-2	590	0	68019.2	15	50	2.93624e-05	0.2881	77.4903	STIP1	Stress-induced-phosphoprotein 1 isoform Iso 2
nxp:NX_P31948-1	543	0	62581.4	15	50	3.19039e-05	0.3131	77.4903	STIP1	Stress-induced-phosphoprotein 1 isoform Iso 1
nxp:NX_P31947-2	216	2	24303	7	106	0.00017003	0.3102	161.076	SFN	14-3-3 protein sigma isoform Iso 2
nxp:NX_P31947-1	248	2	27738.7	9	108	0.000150885	0.3992	163.967	SFN	14-3-3 protein sigma isoform Iso 1
nxp:NX_P31946-1	246	15	28046.8	28	249	0.000350702	0.626	376.819	YWHAB	14-3-3 protein beta/alpha isoform Long
nxp:NX_P31943-1	449	0	49180.4	3	18	1.38899e-05	0.0958	32.6804	HNRNPH1	Heterogeneous nuclear ribonucleoprotein H isoform Iso 1
nxp:NX_P31689-2	331	2	37002.8	2	4	4.18703e-06	0.0514	5.4636	DNAJA1	DnaJ homolog subfamily A member 1 isoform Iso 2
nxp:NX_P31151-1	101	3	11445.6	3	10	3.43046e-05	0.3168	15.915	S100A7	Protein S100-A7 isoform Iso 1
nxp:NX_P31150-1	447	6	50532.1	14	46	3.56553e-05	0.3714	86.0392	GDI1	Rab GDP dissociation inhibitor alpha isoform Iso 1
nxp:NX_P31146-1	461	57	50975.8	58	750	0.000563682	0.6443	1252.29	CORO1A	Coronin-1A isoform Iso 1
nxp:NX_P31025-1	176	3	19219.8	6	26	5.1184e-05	0.3182	48.2026	LCN1	Lipocalin-1 isoform Iso 1
nxp:NX_P30838-1	453	4	50344.8	4	8	6.11879e-06	0.0949	11.5038	ALDH3A1	Aldehyde dehydrogenase, dimeric NADP-preferring isoform Iso 1
nxp:NX_P30740-1	379	28	42696.7	29	344	0.00031448	0.6121	573.557	SERPINB1	Leukocyte elastase inhibitor isoform Iso 1
nxp:NX_P30626-3	180	1	19975.7	5	12	2.30984e-05	0.2222	18.34	SRI	Sorcin isoform Iso 3
nxp:NX_P30626-2	183	0	20313.8	4	10	1.89331e-05	0.1803	16.1468	SRI	Sorcin isoform Iso 2
nxp:NX_P30626-1	198	0	21644.3	4	10	1.74988e-05	0.1667	16.1468	SRI	Sorcin isoform Iso 1
nxp:NX_P30613-2	543	0	58439.6	7	104	6.63602e-05	0.0516	169.479	PKLR	Pyruvate kinase PKLR isoform L-type
nxp:NX_P30613-1	574	0	61773.5	7	104	6.27763e-05	0.0488	169.479	PKLR	Pyruvate kinase PKLR isoform R-type
nxp:NX_P30520-1	456	6	50047.8	6	18	1.36767e-05	0.1864	27.5942	ADSS2	Adenylosuccinate synthetase isozyme 2 isoform Iso 1
nxp:NX_P30511-3	442	0	50388.4	2	6	4.7033e-06	0.0498	9.7346	HLA-F	HLA class I histocompatibility antigen, alpha chain F isoform Iso 3
nxp:NX_P30511-1	346	0	39019.4	2	6	6.00827e-06	0.0636	9.7346	HLA-F	HLA class I histocompatibility antigen, alpha chain F isoform Iso 1
nxp:NX_P30273-1	86	3	9643.3	3	6	2.41728e-05	0.2093	9.222	FCER1G	High affinity immunoglobulin epsilon receptor subunit gamma isoform Iso 1
nxp:NX_P30153-1	589	5	65248.9	5	18	1.05884e-05	0.1188	32.1306	PPP2R1A	Serine/threonine-protein phosphatase 2A 65 kDa regulatory subunit A alpha isoform isoform Iso 1
nxp:NX_P30101-1	505	33	56728.7	33	335	0.000229841	0.6436	534.279	PDIA3	Protein disulfide-isomerase A3 isoform Iso 1
nxp:NX_P30086-1	187	11	21025.7	11	43	7.96711e-05	0.7594	70.9941	PEBP1	Phosphatidylethanolamine-binding protein 1 isoform Iso 1
nxp:NX_P30085-3	228	0	25820.3	2	6	9.11781e-06	0.1228	11.831	CMPK1	UMP-CMP kinase isoform Iso 3
nxp:NX_P30085-2	147	0	16519.2	2	6	1.41419e-05	0.1905	11.831	CMPK1	UMP-CMP kinase isoform Iso 2
nxp:NX_P30049-1	168	2	17461.2	2	4	8.24944e-06	0.1369	5.8696	ATP5F1D	ATP synthase subunit delta, mitochondrial isoform Iso 1
nxp:NX_P30048-2	238	0	25804.3	3	12	1.74694e-05	0.1555	19.728	PRDX3	Thioredoxin-dependent peroxide reductase, mitochondrial isoform Iso 2
nxp:NX_P30048-1	256	0	27657.2	3	12	1.62411e-05	0.1445	19.728	PRDX3	Thioredoxin-dependent peroxide reductase, mitochondrial isoform Iso 1
nxp:NX_P30044-4	125	2	12870.7	6	40	0.000110873	0.32	66.024	PRDX5	Peroxiredoxin-5, mitochondrial isoform Iso 4
nxp:NX_P30044-3	170	3	17425.1	12	77	0.000156934	0.4882	127.444	PRDX5	Peroxiredoxin-5, mitochondrial isoform Iso 3
nxp:NX_P30044-1	214	5	22054.5	15	140	0.000226667	0.5374	249.542	PRDX5	Peroxiredoxin-5, mitochondrial isoform Mitochondrial
nxp:NX_P30043-1	206	2	22087.4	2	8	1.34554e-05	0.0825	12.9646	BLVRB	Flavin reductase (NADPH) isoform Iso 1
nxp:NX_P30041-1	224	12	25001.2	12	56	8.66192e-05	0.6607	89.1422	PRDX6	Peroxiredoxin-6 isoform Iso 1
nxp:NX_P30040-2	53	0	5455	1	10	6.53729e-05	0.2264	15.336	ERP29	Endoplasmic reticulum resident protein 29 isoform Iso 2
nxp:NX_P30040-1	261	4	28957.1	5	28	3.71699e-05	0.2261	44.7078	ERP29	Endoplasmic reticulum resident protein 29 isoform Iso 1
nxp:NX_P29992-1	359	4	42078.5	6	14	1.35116e-05	0.2563	20.0642	GNA11	Guanine nucleotide-binding protein subunit alpha-11 isoform Iso 1
nxp:NX_P29966-1	332	16	31517.9	16	88	9.18372e-05	0.4669	166.183	MARCKS	Myristoylated alanine-rich C-kinase substrate isoform Iso 1
nxp:NX_P29692-3	257	0	28522.4	4	12	1.61779e-05	0.179	18.6256	EEF1D	Elongation factor 1-delta isoform Iso 3
nxp:NX_P29692-2	647	0	71346.1	4	12	6.42615e-06	0.0711	18.6256	EEF1D	Elongation factor 1-delta isoform Iso 2
nxp:NX_P29508-2	338	8	38507.4	31	204	0.000209116	0.6893	391.985	SERPINB3	Serpin B3 isoform Iso 2
nxp:NX_P29508-1	390	5	44518.5	39	242	0.000214993	0.6821	484.769	SERPINB3	Serpin B3 isoform Iso 1
nxp:NX_P29466-2	383	0	42842.5	1	2	1.80928e-06	0.0261	4.0188	CASP1	Caspase-1 isoform Beta
nxp:NX_P29466-1	404	0	45111.5	1	2	1.71523e-06	0.0248	4.0188	CASP1	Caspase-1 isoform Alpha
nxp:NX_P29401-2	631	0	68752.1	66	614	0.000337142	0.7401	1153.44	TKT	Transketolase isoform Iso 2
nxp:NX_P29401-1	623	34	67816.7	79	693	0.000385407	0.7673	1275.3	TKT	Transketolase isoform Iso 1
nxp:NX_P29350-4	624	0	70069.4	9	22	1.22155e-05	0.1635	31.0544	PTPN6	Tyrosine-protein phosphatase non-receptor type 6 isoform Iso 4
nxp:NX_P29350-3	597	0	67659.1	10	26	1.50894e-05	0.191	36.7704	PTPN6	Tyrosine-protein phosphatase non-receptor type 6 isoform Iso 2
nxp:NX_P29350-2	556	1	63067.7	10	26	1.62021e-05	0.205	36.1342	PTPN6	Tyrosine-protein phosphatase non-receptor type 6 isoform Iso 3
nxp:NX_P29350-1	595	0	67501	10	26	1.51402e-05	0.1916	36.7704	PTPN6	Tyrosine-protein phosphatase non-receptor type 6 isoform Iso 1
nxp:NX_P29279-2	322	0	35162.4	3	8	8.60811e-06	0.1211	12.479	CCN2	CCN family member 2 isoform Iso 2
nxp:NX_P29279-1	349	0	38046.8	3	8	7.94216e-06	0.1117	12.479	CCN2	CCN family member 2 isoform Iso 1
nxp:NX_P29034-1	98	5	11091.3	5	10	3.53548e-05	0.3673	14.909	S100A2	Protein S100-A2 isoform Iso 1
nxp:NX_P28838-1	519	14	56112.8	14	30	2.00276e-05	0.3815	49.3736	LAP3	Cytosol aminopeptidase isoform Iso 1
nxp:NX_P28799-3	413	15	44084	25	180	0.000151007	0.4915	315.58	GRN	Progranulin isoform Iso 3
nxp:NX_P28799-2	438	9	46939.7	28	308	0.000243641	0.3562	579.881	GRN	Progranulin isoform Iso 2
nxp:NX_P28799-1	593	0	63481.8	30	324	0.000189306	0.4216	614.385	GRN	Progranulin isoform Iso 1
nxp:NX_P28676-1	217	15	23976.5	15	165	0.00026345	0.553	271.365	GCA	Grancalcin isoform Iso 1
nxp:NX_P28066-1	241	5	26376.2	5	18	2.58779e-05	0.3071	32.7126	PSMA5	Proteasome subunit alpha type-5 isoform Iso 1
nxp:NX_P28065-2	209	1	22296	4	10	1.65778e-05	0.1483	16.0898	PSMB9	Proteasome subunit beta type-9 isoform LMP2.S
nxp:NX_P28065-1	219	0	23231.5	3	8	1.26567e-05	0.0959	12.9716	PSMB9	Proteasome subunit beta type-9 isoform LMP2.L
nxp:NX_P28062-2	272	0	29732.3	2	4	5.09524e-06	0.0956	7.564	PSMB8	Proteasome subunit beta type-8 isoform Iso 2
nxp:NX_P28062-1	276	0	30316.6	2	4	5.0214e-06	0.0942	7.564	PSMB8	Proteasome subunit beta type-8 isoform Iso 1
nxp:NX_P27918-1	469	15	51224	15	89	6.57493e-05	0.2985	151.223	CFP	Properdin isoform Iso 1
nxp:NX_P27824-2	627	18	71439.9	18	70	3.86816e-05	0.3461	126.416	CANX	Calnexin isoform Iso 2
nxp:NX_P27797-1	417	31	48093.8	31	184	0.000152882	0.7266	307.169	CALR	Calreticulin isoform Iso 1
nxp:NX_P27701-2	242	0	26782.3	1	4	5.72689e-06	0.0413	5.8524	CD82	CD82 antigen isoform Iso 2
nxp:NX_P27701-1	267	0	29587.8	1	4	5.19066e-06	0.0375	5.8524	CD82	CD82 antigen isoform Iso 1
nxp:NX_P27695-1	318	9	35514.2	9	50	5.44775e-05	0.4057	73.4336	APEX1	DNA-(apurinic or apyrimidinic site) endonuclease isoform Iso 1
nxp:NX_P27487-1	766	2	88204.5	2	4	1.80928e-06	0.03	5.622	DPP4	Dipeptidyl peptidase 4 isoform Iso 1
nxp:NX_P27482-1	149	0	16861.9	2	7	1.62774e-05	0.047	8.5255	CALML3	Calmodulin-like protein 3 isoform Iso 1
nxp:NX_P27348-1	245	10	27728.8	19	144	0.000203643	0.4898	216.293	YWHAQ	14-3-3 protein theta isoform Iso 1
nxp:NX_P27169-1	355	3	39688.2	3	8	7.80792e-06	0.093	11.085	PON1	Serum paraoxonase/arylesterase 1 isoform Iso 1
nxp:NX_P27105-2	123	7	13448	16	227	0.000639432	0.6016	404.946	STOM	Stomatin isoform Iso 2
nxp:NX_P27105-1	288	26	31692.7	39	490	0.000589491	0.7014	875.764	STOM	Stomatin isoform Iso 1
nxp:NX_P26641-2	487	0	56096.3	8	18	1.28061e-05	0.154	28.2216	EEF1G	Elongation factor 1-gamma isoform Iso 2
nxp:NX_P26641-1	437	2	50069.1	9	22	1.74428e-05	0.2037	32.6776	EEF1G	Elongation factor 1-gamma isoform Iso 1
nxp:NX_P26599-3	557	0	59577.9	3	10	6.22041e-06	0.0682	15.3644	PTBP1	Polypyrimidine tract-binding protein 1 isoform Iso 3
nxp:NX_P26599-2	550	0	58982.5	3	10	6.29958e-06	0.0691	15.3644	PTBP1	Polypyrimidine tract-binding protein 1 isoform Iso 2
nxp:NX_P26599-1	531	0	57167.6	3	10	6.52498e-06	0.0716	15.3644	PTBP1	Polypyrimidine tract-binding protein 1 isoform Iso 1
nxp:NX_P26583-1	209	27	24000.7	30	360	0.000596802	0.7033	690.83	HMGB2	High mobility group protein B2 isoform Iso 1
nxp:NX_P26447-1	101	21	11702.7	21	217	0.00074441	0.7327	348.479	S100A4	Protein S100-A4 isoform Iso 1
nxp:NX_P26038-1	577	70	67759.8	88	957	0.000574659	0.8094	1674.16	MSN	Moesin isoform Iso 1
nxp:NX_P26022-1	381	8	41930.8	8	18	1.6369e-05	0.1864	33.1822	PTX3	Pentraxin-related protein PTX3 isoform Iso 1
nxp:NX_P25815-1	95	23	10375.2	23	255	0.000930016	0.9579	490.74	S100P	Protein S100-P isoform Iso 1
nxp:NX_P25789-1	261	8	29447.2	8	18	2.38949e-05	0.3142	34.0338	PSMA4	Proteasome subunit alpha type-4 isoform Iso 1
nxp:NX_P25788-2	248	1	27611.7	6	16	2.23533e-05	0.2621	27.4972	PSMA3	Proteasome subunit alpha type-3 isoform Iso 2
nxp:NX_P25788-1	255	0	28397.1	5	14	1.90222e-05	0.2118	24.7954	PSMA3	Proteasome subunit alpha type-3 isoform Iso 1
nxp:NX_P25787-1	234	9	25864.3	9	30	4.44201e-05	0.4744	46.9522	PSMA2	Proteasome subunit alpha type-2 isoform Iso 1
nxp:NX_P25786-2	269	0	30202.3	9	20	2.57603e-05	0.3309	32.0196	PSMA1	Proteasome subunit alpha type-1 isoform Long
nxp:NX_P25786-1	263	3	29518.9	12	26	3.42524e-05	0.4373	38.7	PSMA1	Proteasome subunit alpha type-1 isoform Short
nxp:NX_P25774-2	281	3	31587.4	11	56	6.90487e-05	0.3559	90.632	CTSS	Cathepsin S isoform Iso 2
nxp:NX_P25774-1	331	2	37453.3	11	54	5.65249e-05	0.3172	85.571	CTSS	Cathepsin S isoform Iso 1
nxp:NX_P25705-3	531	1	57493.4	7	24	1.566e-05	0.1412	37.5066	ATP5F1A	ATP synthase subunit alpha, mitochondrial isoform Iso 3
nxp:NX_P25705-1	553	4	59695.6	10	42	2.63147e-05	0.1971	70.4964	ATP5F1A	ATP synthase subunit alpha, mitochondrial isoform Iso 1
nxp:NX_P25685-1	340	1	38002.4	1	4	4.0762e-06	0.0412	6.29	DNAJB1	DnaJ homolog subfamily B member 1 isoform Iso 1
nxp:NX_P25398-1	132	2	14487.5	2	4	1.04993e-05	0.1894	6.9836	RPS12	40S ribosomal protein S12 isoform Iso 1
nxp:NX_P25311-1	298	77	34219.1	77	2510	0.00291831	0.8054	5612.21	AZGP1	Zinc-alpha-2-glycoprotein isoform Iso 1
nxp:NX_P25024-1	350	1	39746.8	1	4	3.95973e-06	0.0286	6.6616	CXCR1	C-X-C chemokine receptor type 1 isoform Iso 1
nxp:NX_P24844-2	118	0	13838.8	2	6	1.76175e-05	0.2373	10.3712	MYL9	Myosin regulatory light polypeptide 9 isoform Iso 2
nxp:NX_P24844-1	172	0	19796.4	3	8	1.61152e-05	0.2267	14.9902	MYL9	Myosin regulatory light polypeptide 9 isoform Iso 1
nxp:NX_P24821-6	1564	3	171231	14	40	8.86129e-06	0.1202	55.4166	TNC	Tenascin isoform Iso 6
nxp:NX_P24821-5	1655	0	181393	12	34	7.11795e-06	0.1015	47.1888	TNC	Tenascin isoform Iso 5
nxp:NX_P24821-4	2110	0	230702	14	40	6.56828e-06	0.091	55.6274	TNC	Tenascin isoform Iso 4
nxp:NX_P24821-3	1837	0	201212	12	34	6.41274e-06	0.0915	47.1888	TNC	Tenascin isoform Iso 3
nxp:NX_P24821-2	1746	0	191232	12	34	6.74697e-06	0.0962	47.1888	TNC	Tenascin isoform Iso 2
nxp:NX_P24821-1	2201	0	240682	14	40	6.29671e-06	0.0872	55.6274	TNC	Tenascin isoform Iso 1
nxp:NX_P24666-4	112	0	12204.1	2	4	1.23742e-05	0.1964	7.3228	ACP1	Low molecular weight phosphotyrosine protein phosphatase isoform Iso 4
nxp:NX_P24666-1	158	0	18012.8	2	4	8.77156e-06	0.1392	7.3228	ACP1	Low molecular weight phosphotyrosine protein phosphatase isoform Iso 1
nxp:NX_P24534-1	225	1	24730.3	1	2	3.07979e-06	0.0667	5.3542	EEF1B2	Elongation factor 1-beta isoform Iso 1
nxp:NX_P24158-1	256	45	27771.3	45	527	0.000713255	0.6484	940.085	PRTN3	Myeloblastin isoform Iso 1
nxp:NX_P23588-2	572	0	64749.1	2	4	2.42291e-06	0.0542	7.132	EIF4B	Eukaryotic translation initiation factor 4B isoform Iso 2
nxp:NX_P23588-1	611	0	69092.3	2	4	2.26826e-06	0.0507	7.132	EIF4B	Eukaryotic translation initiation factor 4B isoform Iso 1
nxp:NX_P23528-1	166	37	18472.6	46	526	0.00109787	0.8795	943.356	CFL1	Cofilin-1 isoform Iso 1
nxp:NX_P23527-1	126	2	13879.5	50	3270	0.00899189	0.8175	6124.06	H2BC17	Histone H2B type 1-O isoform Iso 1
nxp:NX_P23526-1	432	8	47667.2	8	22	1.76446e-05	0.2407	34.48	AHCY	Adenosylhomocysteinase isoform Iso 1
nxp:NX_P23497-1	879	0	100336	5	29	1.1431e-05	0.033	46.7278	SP100	Nuclear autoantigen Sp-100 isoform Sp100-HMG
nxp:NX_P23396-2	259	0	28450.5	2	8	1.0702e-05	0.0656	13.5894	RPS3	40S ribosomal protein S3 isoform Iso 2
nxp:NX_P23396-1	243	0	26653.4	2	8	1.14066e-05	0.07	13.5894	RPS3	40S ribosomal protein S3 isoform Iso 1
nxp:NX_P23381-1	471	19	53113.6	19	60	4.41372e-05	0.5414	107.566	WARS1	Tryptophan--tRNA ligase, cytoplasmic isoform Iso 1
nxp:NX_P23284-1	216	19	23709.5	19	76	0.000121908	0.5602	122.109	PPIB	Peptidyl-prolyl cis-trans isomerase B isoform Iso 1
nxp:NX_P23246-2	669	1	72199.7	5	20	1.0358e-05	0.0613	36.9291	SFPQ	Splicing factor, proline- and glutamine-rich isoform Short
nxp:NX_P23246-1	707	3	76083.6	7	29	1.42119e-05	0.0792	50.6276	SFPQ	Splicing factor, proline- and glutamine-rich isoform Long
nxp:NX_P23142-4	683	0	74365.9	8	46	2.33352e-05	0.0966	71.9402	FBLN1	Fibulin-1 isoform C
nxp:NX_P23142-3	601	3	65381.2	10	58	3.3437e-05	0.1614	91.8978	FBLN1	Fibulin-1 isoform B
nxp:NX_P23142-1	703	1	77144.3	9	48	2.3657e-05	0.1266	76.9086	FBLN1	Fibulin-1 isoform D
nxp:NX_P23141-3	566	0	62335.1	3	6	3.6729e-06	0.1007	8.2328	CES1	Liver carboxylesterase 1 isoform Iso 3
nxp:NX_P23141-2	568	0	62534.2	3	6	3.65996e-06	0.1004	8.2328	CES1	Liver carboxylesterase 1 isoform Iso 2
nxp:NX_P23141-1	567	0	62463.1	3	6	3.66642e-06	0.1005	8.2328	CES1	Liver carboxylesterase 1 isoform Iso 1
nxp:NX_P23083-1	117	4	13058.3	7	81	0.000239868	0.641	140.45	IGHV1-2	Immunoglobulin heavy variable 1-2 isoform Iso 1
nxp:NX_P22894-1	467	44	53360.5	44	382	0.000283413	0.5889	658.016	MMP8	Neutrophil collagenase isoform Iso 1
nxp:NX_P22792-1	545	7	60500.1	7	16	1.01718e-05	0.2275	28.4542	CPN2	Carboxypeptidase N subunit 2 isoform Iso 1
nxp:NX_P22692-1	258	3	27897.5	3	8	1.07435e-05	0.1202	13.3	IGFBP4	Insulin-like growth factor-binding protein 4 isoform Iso 1
nxp:NX_P22626-2	341	8	35965.9	20	77	7.82367e-05	0.4252	134.839	HNRNPA2B1	Heterogeneous nuclear ribonucleoproteins A2/B1 isoform A2
nxp:NX_P22626-1	353	0	37388.7	15	58	5.69282e-05	0.3428	109.593	HNRNPA2B1	Heterogeneous nuclear ribonucleoproteins A2/B1 isoform B1
nxp:NX_P22532-1	72	1	7881.6	3	104	0.000500466	0.4306	156.015	SPRR2D	Small proline-rich protein 2D isoform Iso 1
nxp:NX_P22531-1	72	0	7831.6	2	100	0.000481218	0.3056	152.726	SPRR2E	Small proline-rich protein 2E isoform Iso 1
nxp:NX_P22492-1	207	9	21987.7	14	302	0.000505488	0.1304	618.911	H1-6	Histone H1t isoform Iso 1
nxp:NX_P22392-2	267	1	30099.6	9	67	8.69436e-05	0.2846	108.983	NME2	Nucleoside diphosphate kinase B isoform Iso 3
nxp:NX_P22352-1	226	4	25518.9	4	12	1.8397e-05	0.2566	18.878	GPX3	Glutathione peroxidase 3 isoform Iso 1
nxp:NX_P22314-1	1058	4	117756	19	54	1.76841e-05	0.2732	100.311	UBA1	Ubiquitin-like modifier-activating enzyme 1 isoform Iso 1
nxp:NX_P22234-2	432	0	47909.6	1	2	1.60406e-06	0.0301	5.4634	PAICS	Multifunctional protein ADE2 isoform Iso 2
nxp:NX_P22234-1	425	0	47031.1	1	2	1.63048e-06	0.0306	5.4634	PAICS	Multifunctional protein ADE2 isoform Iso 1
nxp:NX_P22079-2	629	12	70920.9	47	308	0.000169658	0.6614	508.727	LPO	Lactoperoxidase isoform Iso 2
nxp:NX_P22079-1	712	5	80218.9	49	302	0.000146961	0.6292	503.109	LPO	Lactoperoxidase isoform Iso 1
nxp:NX_P22061-2	228	0	24645.5	5	12	1.82356e-05	0.4167	19.2527	PCMT1	Protein-L-isoaspartate(D-aspartate) O-methyltransferase isoform Iso 2
nxp:NX_P22061-1	227	0	24602.6	5	12	1.83159e-05	0.4185	19.2527	PCMT1	Protein-L-isoaspartate(D-aspartate) O-methyltransferase isoform Iso 1
nxp:NX_P21980-3	349	0	38627.9	2	8	7.94216e-06	0.0487	11.1984	TGM2	Protein-glutamine gamma-glutamyltransferase 2 isoform Iso 3
nxp:NX_P21980-2	548	0	61621.1	10	30	1.89677e-05	0.2427	56.5356	TGM2	Protein-glutamine gamma-glutamyltransferase 2 isoform Iso 2
nxp:NX_P21980-1	687	3	77261.7	13	36	1.8156e-05	0.2489	67.9466	TGM2	Protein-glutamine gamma-glutamyltransferase 2 isoform Iso 1
nxp:NX_P21926-1	228	4	25381	4	48	7.29424e-05	0.2018	96.4427	CD9	CD9 antigen isoform Iso 1
nxp:NX_P21741-2	87	0	9488.2	1	2	7.96498e-06	0.1839	5.336	MDK	Midkine isoform Iso 2
nxp:NX_P21741-1	143	3	15557	4	12	2.9075e-05	0.3706	27.008	MDK	Midkine isoform Iso 1
nxp:NX_P21589-2	524	0	57893.7	7	14	9.25701e-06	0.2519	22.4036	NT5E	5'-nucleotidase isoform Iso 2
nxp:NX_P21589-1	574	0	63309.5	7	14	8.45065e-06	0.23	22.4036	NT5E	5'-nucleotidase isoform Iso 1
nxp:NX_P21333-2	2639	34	279826	99	580	7.61487e-05	0.4221	962.736	FLNA	Filamin-A isoform Iso 2
nxp:NX_P21333-1	2647	0	280546	85	496	6.49235e-05	0.3952	847.01	FLNA	Filamin-A isoform Iso 1
nxp:NX_P21281-1	511	2	56446.9	2	4	2.71215e-06	0.0489	6.7812	ATP6V1B2	V-type proton ATPase subunit B, brain isoform isoform Iso 1
nxp:NX_P21217-1	361	0	42072.2	2	4	3.83908e-06	0.0637	6.0764	FUT3	3-galactosyl-N-acetylglucosaminide 4-alpha-L-fucosyltransferase FUT3 isoform Iso 1
nxp:NX_P20962-1	102	3	11505.2	3	16	5.43493e-05	0.2353	25.4884	PTMS	Parathymosin isoform Iso 1
nxp:NX_P20930-1	4061	2	434904	2	2	1.70636e-07	0.0069	2.9647	FLG	Filaggrin isoform Iso 1
nxp:NX_P20851-2	251	0	28249.4	3	6	8.28231e-06	0.1793	11.7356	C4BPB	C4b-binding protein beta chain isoform Iso 2
nxp:NX_P20851-1	252	0	28320.4	3	6	8.24944e-06	0.1786	11.7356	C4BPB	C4b-binding protein beta chain isoform Iso 1
nxp:NX_P20848-1	420	0	47842.9	3	614	0.000506516	0.0595	848.186	SERPINA2	Putative alpha-1-antitrypsin-related protein isoform Iso 1
nxp:NX_P20810-9	750	1	80197.9	13	45	2.07886e-05	0.22	85.1526	CAST	Calpastatin isoform Iso 9
nxp:NX_P20810-7	772	0	82702.3	12	44	1.97474e-05	0.1891	83.9043	CAST	Calpastatin isoform Iso 7
nxp:NX_P20810-6	791	0	84873.5	12	44	1.9273e-05	0.1846	83.9043	CAST	Calpastatin isoform Iso 6
nxp:NX_P20810-5	756	0	81101.4	12	44	2.01653e-05	0.1931	83.9043	CAST	Calpastatin isoform Iso 5
nxp:NX_P20810-2	695	5	75240.6	15	54	2.69205e-05	0.2806	96.1193	CAST	Calpastatin isoform Iso 2
nxp:NX_P20810-10	769	0	82369.1	12	44	1.98244e-05	0.1899	83.9043	CAST	Calpastatin isoform Iso 10
nxp:NX_P20742-2	1268	9	140261	24	202	5.51958e-05	0.1388	314.831	PZP	Pregnancy zone protein isoform Iso 2
nxp:NX_P20742-1	1482	0	163742	20	176	4.1147e-05	0.0972	283.764	PZP	Pregnancy zone protein isoform Iso 1
nxp:NX_P20702-1	1163	1	127731	3	41	1.22146e-05	0.0258	64.1735	ITGAX	Integrin alpha-X isoform Iso 1
nxp:NX_P20700-1	586	39	66349.6	41	244	0.000144267	0.5222	379.008	LMNB1	Lamin-B1 isoform Iso 1
nxp:NX_P20671-1	130	0	14080.9	25	1271	0.00338748	0.5231	2477.15	H2AC7	Histone H2A type 1-D isoform Iso 1
nxp:NX_P20618-1	241	4	26454.4	4	12	1.72519e-05	0.195	25.1552	PSMB1	Proteasome subunit beta type-1 isoform Iso 1
nxp:NX_P20592-2	201	0	22073.3	3	16	2.75802e-05	0.2438	23.954	MX2	Interferon-induced GTP-binding protein Mx2 isoform Iso 2
nxp:NX_P20592-1	715	0	82018.7	4	18	8.72249e-06	0.0783	27.258	MX2	Interferon-induced GTP-binding protein Mx2 isoform Iso 1
nxp:NX_P20591-2	508	0	55608.6	9	30	2.04612e-05	0.252	47.6846	MX1	Interferon-induced GTP-binding protein Mx1 isoform Iso 2
nxp:NX_P20591-1	662	4	75455.2	13	38	1.98884e-05	0.281	62.6926	MX1	Interferon-induced GTP-binding protein Mx1 isoform Iso 1
nxp:NX_P20292-1	161	2	18127.4	2	48	0.000103297	0.118	59.6214	ALOX5AP	Arachidonate 5-lipoxygenase-activating protein isoform Iso 1
nxp:NX_P20160-1	251	36	26850.6	37	950	0.00131137	0.6295	1850.33	AZU1	Azurocidin isoform Iso 1
nxp:NX_P20073-2	466	0	50265.7	5	16	1.18962e-05	0.1159	29.5462	ANXA7	Annexin A7 isoform Iso 2
nxp:NX_P20073-1	488	0	52687.7	5	16	1.13599e-05	0.1107	29.5462	ANXA7	Annexin A7 isoform Iso 1
nxp:NX_P20061-1	433	30	48158	30	359	0.000287264	0.4988	732.671	TCN1	Transcobalamin-1 isoform Iso 1
nxp:NX_P19971-2	487	0	50355.4	11	50	3.55725e-05	0.2669	87.7988	TYMP	Thymidine phosphorylase isoform Iso 2
nxp:NX_P19971-1	482	4	49906.2	14	66	4.74429e-05	0.3237	115.981	TYMP	Thymidine phosphorylase isoform Iso 1
nxp:NX_P19961-2	370	0	41976.5	12	62	5.80582e-05	0.3622	103.242	AMY2B	Alpha-amylase 2B isoform Iso 2
nxp:NX_P19961-1	511	0	57655	16	90	6.10233e-05	0.3777	144.889	AMY2B	Alpha-amylase 2B isoform Iso 1
nxp:NX_P19957-1	117	14	12243.4	14	219	0.000648533	0.641	379.247	PI3	Elafin isoform Iso 1
nxp:NX_P19878-4	445	0	50287.5	5	14	1.09004e-05	0.0921	21.7172	NCF2	Neutrophil cytosol factor 2 isoform Iso 4
nxp:NX_P19878-3	481	0	54393.8	5	14	1.00846e-05	0.0852	21.7172	NCF2	Neutrophil cytosol factor 2 isoform Iso 3
nxp:NX_P19878-1	526	0	59705.5	5	14	9.22181e-06	0.0779	21.7172	NCF2	Neutrophil cytosol factor 2 isoform Iso 1
nxp:NX_P19827-1	911	15	101308	15	54	2.05376e-05	0.202	109.761	ITIH1	Inter-alpha-trypsin inhibitor heavy chain H1 isoform Iso 1
nxp:NX_P19823-1	946	28	106379	28	116	4.24855e-05	0.3034	190.396	ITIH2	Inter-alpha-trypsin inhibitor heavy chain H2 isoform Iso 1
nxp:NX_P19652-1	201	39	23569.6	55	1858	0.00320275	0.6318	3590.51	ORM2	Alpha-1-acid glycoprotein 2 isoform Iso 1
nxp:NX_P19338-1	710	8	76550.3	8	28	1.36639e-05	0.131	42.2884	NCL	Nucleolin isoform Iso 1
nxp:NX_P19105-1	171	4	19763.5	12	68	0.00013778	0.5965	114.408	MYL12A	Myosin regulatory light chain 12A isoform Iso 1
nxp:NX_P19021-6	955	0	106190	5	12	4.35363e-06	0.0555	16.2964	PAM	Peptidyl-glycine alpha-amidating monooxygenase isoform Iso 6
nxp:NX_P19021-5	974	0	108316	5	12	4.26871e-06	0.0544	16.2964	PAM	Peptidyl-glycine alpha-amidating monooxygenase isoform Iso 5
nxp:NX_P19021-4	887	0	98680.9	5	12	4.6874e-06	0.0598	16.2964	PAM	Peptidyl-glycine alpha-amidating monooxygenase isoform Iso 4
nxp:NX_P19021-3	905	0	100736	5	12	4.59417e-06	0.0586	16.2964	PAM	Peptidyl-glycine alpha-amidating monooxygenase isoform Iso 3
nxp:NX_P19021-2	866	0	96178.1	5	12	4.80106e-06	0.0612	16.2964	PAM	Peptidyl-glycine alpha-amidating monooxygenase isoform Iso 2
nxp:NX_P19021-1	973	0	108245	5	12	4.27309e-06	0.0545	16.2964	PAM	Peptidyl-glycine alpha-amidating monooxygenase isoform Iso 1
nxp:NX_P19013-1	520	1	56091.3	6	127	8.46203e-05	0.1077	202.138	KRT4	Keratin, type II cytoskeletal 4 isoform Iso 1
nxp:NX_P19012-2	251	2	28566.2	5	132	0.000182211	0.1076	202.524	KRT15	Keratin, type I cytoskeletal 15 isoform Iso 2
nxp:NX_P19012-1	456	0	49163.1	8	377	0.000286451	0.1075	607.858	KRT15	Keratin, type I cytoskeletal 15 isoform Iso 1
nxp:NX_P18669-1	254	9	28767.8	21	160	0.000218253	0.5236	306.469	PGAM1	Phosphoglycerate mutase 1 isoform Iso 1
nxp:NX_P18428-1	481	6	53331.9	6	20	1.44065e-05	0.1414	33.006	LBP	Lipopolysaccharide-binding protein isoform Iso 1
nxp:NX_P18206-3	222	2	24870.1	5	14	2.18499e-05	0.2387	26.2814	VCL	Vinculin isoform Iso 3
nxp:NX_P18206-2	1066	19	116631	66	433	0.000140736	0.5478	740.221	VCL	Vinculin isoform Iso 1
nxp:NX_P18206-1	1134	0	123704	60	393	0.000120075	0.4912	685.597	VCL	Vinculin isoform Iso 2
nxp:NX_P18085-1	180	1	20479.7	3	18	3.46477e-05	0.2278	32.7482	ARF4	ADP-ribosylation factor 4 isoform Iso 1
nxp:NX_P18077-1	110	1	12511.8	1	6	1.88987e-05	0.1091	8.3288	RPL35A	60S ribosomal protein L35a isoform Iso 1
nxp:NX_P18065-1	325	25	34773.2	25	346	0.000368864	0.5538	708.859	IGFBP2	Insulin-like growth factor-binding protein 2 isoform Iso 1
nxp:NX_P17987-1	556	5	60287.6	5	12	7.47791e-06	0.1169	18.135	TCP1	T-complex protein 1 subunit alpha isoform Iso 1
nxp:NX_P17931-1	250	10	26118	10	40	5.54363e-05	0.368	68.8708	LGALS3	Galectin-3 isoform Iso 1
nxp:NX_P17927-1	2039	2	223499	4	8	1.3594e-06	0.0265	12.6488	CR1	Complement receptor type 1 isoform Iso 1
nxp:NX_P17900-1	193	3	20806.7	3	6	1.07713e-05	0.1503	6.9364	GM2A	Ganglioside GM2 activator isoform Iso 1
nxp:NX_P17693-6	227	0	25893.5	3	12	1.83159e-05	0.1057	20.374	HLA-G	HLA class I histocompatibility antigen, alpha chain G isoform Iso 6
nxp:NX_P17693-5	319	0	36416.5	3	12	1.30336e-05	0.0752	20.374	HLA-G	HLA class I histocompatibility antigen, alpha chain G isoform Iso 5
nxp:NX_P17693-2	246	0	27658.8	3	12	1.69013e-05	0.0976	20.374	HLA-G	HLA class I histocompatibility antigen, alpha chain G isoform Iso 2
nxp:NX_P17693-1	338	0	38181.8	3	12	1.23009e-05	0.071	20.374	HLA-G	HLA class I histocompatibility antigen, alpha chain G isoform Iso 1
nxp:NX_P17661-1	470	0	53485.1	6	76	5.6026e-05	0.0723	134.019	DES	Desmin isoform Iso 1
nxp:NX_P17655-2	622	1	71412.4	10	22	1.22548e-05	0.2669	37.9902	CAPN2	Calpain-2 catalytic subunit isoform Iso 2
nxp:NX_P17655-1	700	0	79926.8	9	20	9.89933e-06	0.2057	35.1904	CAPN2	Calpain-2 catalytic subunit isoform Iso 1
nxp:NX_P17213-1	487	32	53847.1	32	288	0.000204898	0.5606	504.313	BPI	Bactericidal permeability-increasing protein isoform Iso 1
nxp:NX_P17174-2	392	0	44101.3	3	6	5.30321e-06	0.1122	8.9584	GOT1	Aspartate aminotransferase, cytoplasmic isoform Iso 2
nxp:NX_P17174-1	413	0	46200.5	3	6	5.03356e-06	0.1065	8.9584	GOT1	Aspartate aminotransferase, cytoplasmic isoform Iso 1
nxp:NX_P17096-3	179	0	19664.3	4	26	5.03262e-05	0.2291	62.5177	HMGA1	High mobility group protein HMG-I/HMG-Y isoform HMG-R
nxp:NX_P17096-2	96	1	10654.6	2	18	6.49644e-05	0.3125	38.0139	HMGA1	High mobility group protein HMG-I/HMG-Y isoform HMG-Y
nxp:NX_P17096-1	107	0	11651.1	4	26	8.41906e-05	0.3832	62.5177	HMGA1	High mobility group protein HMG-I/HMG-Y isoform HMG-I
nxp:NX_P17081-1	205	0	22626.5	3	143	0.000241689	0.1073	228.702	RHOQ	Rho-related GTP-binding protein RhoQ isoform Iso 1
nxp:NX_P17066-1	643	0	70966.2	14	137	7.38216e-05	0.1649	238.908	HSPA6	Heat shock 70 kDa protein 6 isoform Iso 1
nxp:NX_P16949-2	174	0	19793.2	9	75	0.000149343	0.3161	120.71	STMN1	Stathmin isoform Iso 2
nxp:NX_P16949-1	149	4	17273.9	11	107	0.000248812	0.4631	179.172	STMN1	Stathmin isoform Iso 1
nxp:NX_P16870-1	476	2	53099.1	2	4	2.91157e-06	0.0693	6.5032	CPE	Carboxypeptidase E isoform Iso 1
nxp:NX_P16562-2	278	0	31542.3	2	12	1.49558e-05	0.0827	21.326	CRISP2	Cysteine-rich secretory protein 2 isoform Iso 2
nxp:NX_P16562-1	243	0	27222.9	2	12	1.711e-05	0.0947	21.326	CRISP2	Cysteine-rich secretory protein 2 isoform Iso 1
nxp:NX_P16520-2	297	0	32593.8	1	26	3.03313e-05	0.0337	36.172	GNB3	Guanine nucleotide-binding protein G(I)/G(S)/G(T) subunit beta-3 isoform Iso 2
nxp:NX_P16520-1	340	0	37178.9	1	26	2.64953e-05	0.0294	36.172	GNB3	Guanine nucleotide-binding protein G(I)/G(S)/G(T) subunit beta-3 isoform Iso 1
nxp:NX_P16403-1	213	25	21333.7	43	981	0.00159574	0.4272	1956.34	H1-2	Histone H1.2 isoform Iso 1
nxp:NX_P16402-1	221	0	22318.3	27	840	0.00131692	0.2941	1662.57	H1-3	Histone H1.3 isoform Iso 1
nxp:NX_P16401-1	226	29	22548.5	40	677	0.0010379	0.4248	1333.55	H1-5	Histone H1.5 isoform Iso 1
nxp:NX_P16152-1	277	3	30337.9	3	8	1.00065e-05	0.1011	10.6732	CBR1	Carbonyl reductase [NADPH] 1 isoform Iso 1
nxp:NX_P16112-3	2431	1	250202	8	22	3.13554e-06	0.0391	41.2322	ACAN	Aggrecan core protein isoform Iso 3
nxp:NX_P16112-2	2492	0	257266	7	20	2.78071e-06	0.0333	38.5896	ACAN	Aggrecan core protein isoform Iso 2
nxp:NX_P16112-1	2530	0	261151	7	20	2.73895e-06	0.0328	38.5896	ACAN	Aggrecan core protein isoform Iso 1
nxp:NX_P16104-1	143	1	15117.4	20	983	0.00238172	0.5524	1808.56	H2AX	Histone H2AX isoform Iso 1
nxp:NX_P16083-1	231	4	25884	4	14	2.09986e-05	0.2165	22.411	NQO2	Ribosyldihydronicotinamide dehydrogenase [quinone] isoform Iso 1
nxp:NX_P16070-9	675	0	74132.8	5	68	3.49043e-05	0.0756	120.472	CD44	CD44 antigen isoform Iso 9
nxp:NX_P16070-8	674	0	74324	6	70	3.59842e-05	0.0935	123.308	CD44	CD44 antigen isoform Iso 8
nxp:NX_P16070-7	713	0	78379.1	6	70	3.40159e-05	0.0884	123.308	CD44	CD44 antigen isoform Iso 7
nxp:NX_P16070-6	699	0	76639.2	6	70	3.46972e-05	0.0901	123.308	CD44	CD44 antigen isoform Iso 6
nxp:NX_P16070-5	734	0	80722.1	6	70	3.30427e-05	0.0858	123.308	CD44	CD44 antigen isoform Iso 5
nxp:NX_P16070-4	699	0	76547.1	6	70	3.46972e-05	0.0901	123.308	CD44	CD44 antigen isoform Iso 4
nxp:NX_P16070-3	711	0	77916.7	6	70	3.41116e-05	0.0886	123.308	CD44	CD44 antigen isoform Iso 3
nxp:NX_P16070-19	139	1	15606.6	3	14	3.48969e-05	0.1367	23.4428	CD44	CD44 antigen isoform Iso 19
nxp:NX_P16070-18	340	0	37236.2	6	70	7.13334e-05	0.1853	123.308	CD44	CD44 antigen isoform Iso 18
nxp:NX_P16070-17	691	0	75891.8	6	70	3.50989e-05	0.0912	123.308	CD44	CD44 antigen isoform Iso 17
nxp:NX_P16070-16	668	0	73086.5	6	70	3.63074e-05	0.0943	123.308	CD44	CD44 antigen isoform Iso 16
nxp:NX_P16070-15	294	1	32036.4	5	70	8.24944e-05	0.1735	122.531	CD44	CD44 antigen isoform Iso 15
nxp:NX_P16070-14	396	0	43123.9	6	70	6.12459e-05	0.1591	123.308	CD44	CD44 antigen isoform Iso 14
nxp:NX_P16070-13	425	0	46214.2	6	70	5.70667e-05	0.1482	123.308	CD44	CD44 antigen isoform Iso 13
nxp:NX_P16070-12	361	0	39373.1	6	70	6.71838e-05	0.1745	123.308	CD44	CD44 antigen isoform Iso 12
nxp:NX_P16070-11	429	0	46518.5	6	70	5.65346e-05	0.1469	123.308	CD44	CD44 antigen isoform Iso 11
nxp:NX_P16070-10	493	0	53359.6	6	70	4.91955e-05	0.1278	123.308	CD44	CD44 antigen isoform Iso 10
nxp:NX_P16070-1	742	0	81469.4	6	70	3.26865e-05	0.0849	123.308	CD44	CD44 antigen isoform Iso 1
nxp:NX_P16050-2	623	1	70045	5	14	7.78599e-06	0.1011	24.7436	ALOX15	Polyunsaturated fatty acid lipoxygenase ALOX15 isoform Iso 2
nxp:NX_P16050-1	662	0	74738.5	4	12	6.28054e-06	0.0816	22.3712	ALOX15	Polyunsaturated fatty acid lipoxygenase ALOX15 isoform Iso 1
nxp:NX_P15941-9	168	0	18247.8	9	69	0.000142303	0.3155	130.452	MUC1	Mucin-1 isoform Iso 9
nxp:NX_P15941-8	273	0	29555.9	13	150	0.000190372	0.337	286.623	MUC1	Mucin-1 isoform Iso 8
nxp:NX_P15941-7	255	0	27530.8	13	150	0.00020381	0.3608	286.623	MUC1	Mucin-1 isoform Y
nxp:NX_P15941-6	230	0	24532.4	10	83	0.000125033	0.2565	157.249	MUC1	Mucin-1 isoform Iso 6
nxp:NX_P15941-4	1243	0	120931	13	150	4.18113e-05	0.074	286.623	MUC1	Mucin-1 isoform Iso 4
nxp:NX_P15941-3	1252	0	121712	13	150	4.15108e-05	0.0735	286.623	MUC1	Mucin-1 isoform Iso 3
nxp:NX_P15941-2	1264	0	122850	13	150	4.11167e-05	0.0728	286.623	MUC1	Mucin-1 isoform Iso 2
nxp:NX_P15941-17	259	0	28261.2	13	150	0.000200662	0.3552	286.623	MUC1	Mucin-1 isoform J13
nxp:NX_P15941-16	166	0	17257.8	8	63	0.000131494	0.253	117.842	MUC1	Mucin-1 isoform E2
nxp:NX_P15941-15	224	0	23714	10	83	0.000128382	0.2634	157.249	MUC1	Mucin-1 isoform T10
nxp:NX_P15941-13	198	1	21631.9	5	86	0.00015049	0.2525	165.551	MUC1	Mucin-1 isoform M6
nxp:NX_P15941-12	159	2	17061.2	10	74	0.000161253	0.3333	139.528	MUC1	Mucin-1 isoform S2
nxp:NX_P15941-11	264	0	28369.3	13	150	0.000196862	0.3485	286.623	MUC1	Mucin-1 isoform Y-LSP
nxp:NX_P15941-10	203	0	21523.9	8	63	0.000107527	0.2069	117.842	MUC1	Mucin-1 isoform F
nxp:NX_P15941-1	1255	0	122011	13	150	4.14115e-05	0.0733	286.623	MUC1	Mucin-1 isoform Iso 1
nxp:NX_P15924-3	2428	0	278724	7	17	2.42591e-06	0.0329	29.5207	DSP	Desmoplakin isoform DSPIa
nxp:NX_P15924-2	2272	1	259939	8	19	2.89747e-06	0.0396	31.3373	DSP	Desmoplakin isoform DPII
nxp:NX_P15924-1	2871	1	331551	8	19	2.29295e-06	0.0313	31.5727	DSP	Desmoplakin isoform DPI
nxp:NX_P15907-1	406	4	46556.6	4	10	8.53391e-06	0.1158	14.394	ST6GAL1	Beta-galactoside alpha-2,6-sialyltransferase 1 isoform Iso 1
nxp:NX_P15586-2	532	1	59931.9	7	24	1.56305e-05	0.1504	36.465	GNS	N-acetylglucosamine-6-sulfatase isoform Iso 2
nxp:NX_P15586-1	552	0	62024	7	22	1.38089e-05	0.1449	34.5588	GNS	N-acetylglucosamine-6-sulfatase isoform Iso 1
nxp:NX_P15531-2	177	1	19622.9	8	46	9.00448e-05	0.3446	74.7193	NME1	Nucleoside diphosphate kinase A isoform Iso 2
nxp:NX_P15328-1	257	20	29781.2	20	151	0.000203572	0.5409	261.336	FOLR1	Folate receptor alpha isoform Iso 1
nxp:NX_P15311-1	586	65	69351.7	77	963	0.000569381	0.802	1766.01	EZR	Ezrin isoform Iso 1
nxp:NX_P15259-1	253	3	28729.8	10	87	0.000119144	0.2451	156.418	PGAM2	Phosphoglycerate mutase 2 isoform Iso 1
nxp:NX_P15169-1	458	2	52235.3	2	4	3.026e-06	0.0393	5.8746	CPN1	Carboxypeptidase N catalytic chain isoform Iso 1
nxp:NX_P15153-1	192	9	21397.1	17	347	0.000626184	0.6771	523.574	RAC2	Ras-related C3 botulinum toxin substrate 2 isoform Iso 1
nxp:NX_P15144-1	967	25	109453	25	86	3.08138e-05	0.2513	138.087	ANPEP	Aminopeptidase N isoform Iso 1
nxp:NX_P14923-1	745	4	81674.7	4	8	3.72055e-06	0.0779	12.9556	JUP	Junction plakoglobin isoform Iso 1
nxp:NX_P14854-1	86	2	10167.7	2	4	1.61152e-05	0.2674	6.9675	COX6B1	Cytochrome c oxidase subunit 6B1 isoform Iso 1
nxp:NX_P14780-1	707	88	78390.3	89	1078	0.000528291	0.7369	1939.58	MMP9	Matrix metalloproteinase-9 isoform Iso 1
nxp:NX_P14649-1	208	0	22731.7	3	66	0.00010994	0.1154	97.3586	MYL6B	Myosin light chain 6B isoform Iso 1
nxp:NX_P14625-1	803	24	92393.3	30	96	4.14219e-05	0.3487	165.501	HSP90B1	Endoplasmin isoform Iso 1
nxp:NX_P14618-3	516	43	56219.3	81	702	0.000471369	0.7035	1330.34	PKM	Pyruvate kinase PKM isoform Iso 3
nxp:NX_P14618-2	531	11	58006.9	72	713	0.000465231	0.7043	1402.88	PKM	Pyruvate kinase PKM isoform M1
nxp:NX_P14618-1	531	0	57882	71	799	0.000521346	0.7797	1556.83	PKM	Pyruvate kinase PKM isoform M2
nxp:NX_P14598-2	278	0	30772.8	1	6	7.47791e-06	0.0288	8.4134	NCF1	Neutrophil cytosol factor 1 isoform Iso 2
nxp:NX_P14598-1	390	0	44635.9	1	6	5.33041e-06	0.0205	8.4134	NCF1	Neutrophil cytosol factor 1 isoform Iso 1
nxp:NX_P14550-1	325	10	36531.8	10	32	3.41146e-05	0.4831	58.8882	AKR1A1	Aldo-keto reductase family 1 member A1 isoform Iso 1
nxp:NX_P14317-2	209	3	23975.2	6	37	6.1338e-05	0.2344	64.578	HCLS1	Hematopoietic lineage cell-specific protein isoform Iso 2
nxp:NX_P14317-1	486	17	53963	20	104	7.41431e-05	0.2963	173.451	HCLS1	Hematopoietic lineage cell-specific protein isoform Iso 1
nxp:NX_P14314-2	525	5	59122.7	20	102	6.73155e-05	0.2267	167.8	PRKCSH	Glucosidase 2 subunit beta isoform Iso 2
nxp:NX_P14314-1	528	0	59369.8	16	92	6.03709e-05	0.2102	154.747	PRKCSH	Glucosidase 2 subunit beta isoform Iso 1
nxp:NX_P14174-1	115	4	12450.2	5	24	7.23082e-05	0.4087	47.9258	MIF	Macrophage migration inhibitory factor isoform Iso 1
nxp:NX_P14151-2	385	6	43570.6	6	16	1.4399e-05	0.1325	26.0176	SELL	L-selectin isoform Iso 2
nxp:NX_P13987-2	130	0	14501	14	302	0.000804892	0.3846	525.001	CD59	CD59 glycoprotein isoform Iso 2
nxp:NX_P13987-1	128	5	14149.8	14	316	0.000855364	0.3906	546.192	CD59	CD59 glycoprotein isoform Iso 1
nxp:NX_P13929-3	391	9	42203.8	19	253	0.000224191	0.2992	482.35	ENO3	Beta-enolase isoform Iso 3
nxp:NX_P13929-2	406	0	44068.9	16	218	0.000186039	0.1995	434.117	ENO3	Beta-enolase isoform Iso 2
nxp:NX_P13929-1	434	0	46939.3	16	218	0.000174037	0.1866	434.117	ENO3	Beta-enolase isoform Iso 1
nxp:NX_P13797-2	617	1	69288.5	7	151	8.47941e-05	0.0859	237.546	PLS3	Plastin-3 isoform Iso 2
nxp:NX_P13797-1	630	0	70748.2	6	149	8.19445e-05	0.0841	234.757	PLS3	Plastin-3 isoform Iso 1
nxp:NX_P13796-2	196	11	21760.1	29	348	0.000615173	0.7653	623.586	LCP1	Plastin-2 isoform Iso 2
nxp:NX_P13796-1	627	83	70225.9	110	1226	0.000677481	0.8421	2286.88	LCP1	Plastin-2 isoform Iso 1
nxp:NX_P13747-1	358	0	40014.7	3	12	1.16137e-05	0.067	20.374	HLA-E	HLA class I histocompatibility antigen, alpha chain E isoform Iso 1
nxp:NX_P13727-2	211	0	23867.6	2	16	2.62731e-05	0.1137	22.2606	PRG2	Bone marrow proteoglycan isoform Iso 2
nxp:NX_P13727-1	222	0	25171.2	2	16	2.49713e-05	0.1081	22.2606	PRG2	Bone marrow proteoglycan isoform Iso 1
nxp:NX_P13726-2	238	0	27110.6	3	8	1.16463e-05	0.1975	16.125	F3	Tissue factor isoform Iso 2
nxp:NX_P13726-1	295	0	33028.8	3	8	9.39598e-06	0.1593	16.125	F3	Tissue factor isoform Iso 1
nxp:NX_P13716-2	359	0	38990.7	2	4	3.86046e-06	0.0808	7.8738	ALAD	Delta-aminolevulinic acid dehydratase isoform Iso 2
nxp:NX_P13716-1	330	0	36253.4	2	4	4.19972e-06	0.0879	7.8738	ALAD	Delta-aminolevulinic acid dehydratase isoform Iso 1
nxp:NX_P13693-1	172	4	19564.6	4	16	3.22304e-05	0.1744	24.847	TPT1	Translationally-controlled tumor protein isoform Iso 1
nxp:NX_P13688-9	399	0	43017.6	3	13	1.12887e-05	0.1328	21.9211	CEACAM1	Carcinoembryonic antigen-related cell adhesion molecule 1 isoform Iso 9
nxp:NX_P13688-8	464	0	50471.3	4	15	1.12008e-05	0.1487	24.6063	CEACAM1	Carcinoembryonic antigen-related cell adhesion molecule 1 isoform Iso 8
nxp:NX_P13688-7	252	0	27396	2	4	5.49963e-06	0.1746	8.2074	CEACAM1	Carcinoembryonic antigen-related cell adhesion molecule 1 isoform Iso 7
nxp:NX_P13688-6	430	0	46863.3	3	13	1.04749e-05	0.1233	21.9211	CEACAM1	Carcinoembryonic antigen-related cell adhesion molecule 1 isoform Iso 6
nxp:NX_P13688-5	461	0	50300.1	3	13	9.77049e-06	0.115	21.9211	CEACAM1	Carcinoembryonic antigen-related cell adhesion molecule 1 isoform Iso 5
nxp:NX_P13688-4	351	0	38536	3	13	1.28325e-05	0.151	21.9211	CEACAM1	Carcinoembryonic antigen-related cell adhesion molecule 1 isoform Iso 4
nxp:NX_P13688-3	321	0	35262.5	3	13	1.40318e-05	0.1651	21.9211	CEACAM1	Carcinoembryonic antigen-related cell adhesion molecule 1 isoform Iso 3
nxp:NX_P13688-2	417	0	45903.8	4	15	1.24632e-05	0.1655	24.6063	CEACAM1	Carcinoembryonic antigen-related cell adhesion molecule 1 isoform Iso 2
nxp:NX_P13688-11	368	0	39828	3	13	1.22397e-05	0.144	21.9211	CEACAM1	Carcinoembryonic antigen-related cell adhesion molecule 1 isoform Iso 11
nxp:NX_P13688-10	468	0	51096.7	4	21	1.5547e-05	0.1474	33.3099	CEACAM1	Carcinoembryonic antigen-related cell adhesion molecule 1 isoform Iso 10
nxp:NX_P13688-1	526	0	57506.7	4	21	1.38327e-05	0.1312	33.3099	CEACAM1	Carcinoembryonic antigen-related cell adhesion molecule 1 isoform Iso 1
nxp:NX_P13671-1	934	35	104700	35	311	0.000115369	0.3961	537.979	C6	Complement component C6 isoform Iso 1
nxp:NX_P13667-1	645	13	72869	13	28	1.50408e-05	0.1907	41.5476	PDIA4	Protein disulfide-isomerase A4 isoform Iso 1
nxp:NX_P13647-1	590	3	62322	43	522	0.000306544	0.5458	863.182	KRT5	Keratin, type II cytoskeletal 5 isoform Iso 1
nxp:NX_P13646-3	420	0	45820.6	9	283	0.000233459	0.1643	454.774	KRT13	Keratin, type I cytoskeletal 13 isoform Iso 3
nxp:NX_P13646-2	355	2	38538.9	8	218	0.000212766	0.1803	355.397	KRT13	Keratin, type I cytoskeletal 13 isoform Iso 2
nxp:NX_P13646-1	458	0	49539.4	9	283	0.000214089	0.1507	454.774	KRT13	Keratin, type I cytoskeletal 13 isoform Iso 1
nxp:NX_P13645-1	584	15	58773.7	52	1185	0.000703039	0.6661	2006.14	KRT10	Keratin, type I cytoskeletal 10 isoform Iso 1
nxp:NX_P13640-2	61	0	6047.3	2	8	4.54396e-05	0.2131	14.6724	MT1G	Metallothionein-1G isoform Iso 2
nxp:NX_P13640-1	62	0	6118.3	2	8	4.47067e-05	0.2097	14.6724	MT1G	Metallothionein-1G isoform Iso 1
nxp:NX_P13639-1	858	26	95258.9	26	94	3.7959e-05	0.3916	147.042	EEF2	Elongation factor 2 isoform Iso 1
nxp:NX_P13498-1	195	2	20981.1	2	6	1.06608e-05	0.1128	10.6872	CYBA	Cytochrome b-245 light chain isoform Iso 1
nxp:NX_P13489-1	461	15	49923.1	15	63	4.73493e-05	0.41	103.835	RNH1	Ribonuclease inhibitor isoform Iso 1
nxp:NX_P13284-1	250	8	27927	8	24	3.32618e-05	0.368	37.2562	IFI30	Gamma-interferon-inducible lysosomal thiol reductase isoform Iso 1
nxp:NX_P13164-1	125	1	13937.3	4	152	0.000421316	0.128	359.751	IFITM1	Interferon-induced transmembrane protein 1 isoform Iso 1
nxp:NX_P13010-1	732	3	82634.3	3	6	2.83997e-06	0.0301	11.2318	XRCC5	X-ray repair cross-complementing protein 5 isoform Iso 1
nxp:NX_P12838-1	97	2	10479.3	2	29	0.000103586	0.1856	58.2967	DEFA4	Neutrophil defensin 4 isoform Iso 1
nxp:NX_P12830-2	821	0	90867.6	2	4	1.68807e-06	0.0378	5.8976	CDH1	Cadherin-1 isoform Iso 2
nxp:NX_P12830-1	882	0	97377.8	2	4	1.57132e-06	0.0351	5.8976	CDH1	Cadherin-1 isoform Iso 1
nxp:NX_P12814-4	930	0	107056	73	622	0.00023173	0.6505	1227.95	ACTN1	Alpha-actinin-1 isoform Iso 4
nxp:NX_P12814-3	914	0	105484	77	643	0.000243747	0.6926	1265.25	ACTN1	Alpha-actinin-1 isoform Iso 3
nxp:NX_P12814-2	887	12	102626	81	664	0.000259369	0.7001	1293.81	ACTN1	Alpha-actinin-1 isoform Iso 2
nxp:NX_P12814-1	892	1	102975	78	645	0.000250535	0.7343	1268.7	ACTN1	Alpha-actinin-1 isoform Iso 1
nxp:NX_P12724-1	160	24	18355.3	25	353	0.000764414	0.7062	602.101	RNASE3	Eosinophil cationic protein isoform Iso 1
nxp:NX_P12429-1	323	48	36334.6	48	643	0.000689735	0.8669	1178.47	ANXA3	Annexin A3 isoform Iso 1
nxp:NX_P12277-1	381	4	42599.3	4	14	1.27314e-05	0.1549	18.566	CKB	Creatine kinase B-type isoform Iso 1
nxp:NX_P12273-1	146	45	16543.8	45	1198	0.00284301	0.774	2458.25	PIP	Prolactin-inducible protein isoform Iso 1
nxp:NX_P12268-1	514	1	55751.6	1	4	2.69632e-06	0.0233	6.366	IMPDH2	Inosine-5'-monophosphate dehydrogenase 2 isoform Iso 1
nxp:NX_P12259-1	2224	3	251528	4	8	1.24632e-06	0.0135	13.4158	F5	Coagulation factor V isoform Iso 1
nxp:NX_P12036-2	963	0	105557	2	18	6.4762e-06	0.0093	26.3593	NEFH	Neurofilament heavy polypeptide isoform Iso 2
nxp:NX_P12036-1	1026	0	112393	2	18	6.07854e-06	0.0088	26.3593	NEFH	Neurofilament heavy polypeptide isoform Iso 1
nxp:NX_P12035-1	628	0	64359.6	9	104	5.73783e-05	0.1035	173.243	KRT3	Keratin, type II cytoskeletal 3 isoform Iso 1
nxp:NX_P11684-1	91	80	9969.1	80	3752	0.0142855	0.8022	7646.19	SCGB1A1	Uteroglobin isoform Iso 1
nxp:NX_P11678-1	715	16	80971.1	23	554	0.000268459	0.165	833.848	EPX	Eosinophil peroxidase isoform Iso 1
nxp:NX_P11413-3	545	5	62410.6	16	48	3.05154e-05	0.2807	71.1186	G6PD	Glucose-6-phosphate 1-dehydrogenase isoform Iso 3
nxp:NX_P11413-2	561	0	63768.3	12	38	2.3469e-05	0.205	58.471	G6PD	Glucose-6-phosphate 1-dehydrogenase isoform Long
nxp:NX_P11279-1	417	5	44835.8	5	14	1.16323e-05	0.1031	20.609	LAMP1	Lysosome-associated membrane glycoprotein 1 isoform Iso 1
nxp:NX_P11234-3	227	1	25676.3	4	20	3.05266e-05	0.207	28.5657	RALB	Ras-related protein Ral-B isoform Iso 3
nxp:NX_P11234-2	228	0	25932.2	3	18	2.73534e-05	0.1579	25.7977	RALB	Ras-related protein Ral-B isoform Iso 2
nxp:NX_P11217-1	842	0	97012.6	2	4	1.64597e-06	0.0273	5.9674	PYGM	Glycogen phosphorylase, muscle form isoform Iso 1
nxp:NX_P11216-1	843	1	96616.5	3	6	2.46603e-06	0.0415	10.7034	PYGB	Glycogen phosphorylase, brain form isoform Iso 1
nxp:NX_P11215-2	1153	0	127209	35	228	6.8514e-05	0.3443	377.029	ITGAM	Integrin alpha-M isoform Iso 2
nxp:NX_P11215-1	1152	12	127080	38	269	8.09047e-05	0.3681	434.4	ITGAM	Integrin alpha-M isoform Iso 1
nxp:NX_P11169-1	496	0	53871.2	4	18	1.25737e-05	0.0806	32.4566	SLC2A3	Solute carrier family 2, facilitated glucose transporter member 3 isoform Iso 1
nxp:NX_P11142-2	493	10	53466.4	41	373	0.000262142	0.5882	665.266	HSPA8	Heat shock cognate 71 kDa protein isoform Iso 2
nxp:NX_P11142-1	646	11	70836.2	52	519	0.000278361	0.5356	901.816	HSPA8	Heat shock cognate 71 kDa protein isoform Iso 1
nxp:NX_P11047-1	1609	2	177470	2	6	1.29202e-06	0.0224	7.4428	LAMC1	Laminin subunit gamma-1 isoform Iso 1
nxp:NX_P11021-1	654	0	72270.4	35	314	0.000166351	0.5153	566.014	HSPA5	Endoplasmic reticulum chaperone BiP isoform Iso 1
nxp:NX_P10909-6	429	26	50200.7	78	1313	0.00106043	0.6713	2445.3	CLU	Clusterin isoform Iso 6
nxp:NX_P10909-5	460	0	53590.5	68	1232	0.000927955	0.6	2301.04	CLU	Clusterin isoform Iso 5
nxp:NX_P10909-2	501	0	57777.6	68	1232	0.000852014	0.5509	2301.04	CLU	Clusterin isoform Iso 2
nxp:NX_P10809-2	158	1	17071.1	6	45	9.86801e-05	0.4747	81.0085	HSPD1	60 kDa heat shock protein, mitochondrial isoform Iso 2
nxp:NX_P10809-1	573	17	60998.4	22	115	6.95372e-05	0.4049	206.039	HSPD1	60 kDa heat shock protein, mitochondrial isoform Iso 1
nxp:NX_P10768-1	282	2	31424.4	2	4	4.91456e-06	0.078	7.241	ESD	S-formylglutathione hydrolase isoform Iso 1
nxp:NX_P10643-1	843	25	93439.3	25	108	4.43885e-05	0.3784	173.769	C7	Complement component C7 isoform Iso 1
nxp:NX_P10619-2	463	0	52437.2	2	6	4.48998e-06	0.0713	9.2472	CTSA	Lysosomal protective protein isoform Iso 2
nxp:NX_P10619-1	480	0	54413.1	2	6	4.33096e-06	0.0688	9.2472	CTSA	Lysosomal protective protein isoform Iso 1
nxp:NX_P10606-1	129	2	13668.9	2	8	2.14869e-05	0.2403	12.5368	COX5B	Cytochrome c oxidase subunit 5B, mitochondrial isoform Iso 1
nxp:NX_P10599-2	85	4	9427.7	12	132	0.000538058	0.6706	254.405	TXN	Thioredoxin isoform Iso 2
nxp:NX_P10599-1	105	4	11711.7	15	144	0.000475168	0.781	285.193	TXN	Thioredoxin isoform Iso 1
nxp:NX_P10451-5	300	1	33804.5	2	4	4.61969e-06	0.0833	6.8926	SPP1	Osteopontin isoform Iso 5
nxp:NX_P10451-4	292	0	32978.4	2	4	4.74626e-06	0.1336	6.2922	SPP1	Osteopontin isoform D
nxp:NX_P10451-3	287	1	32317.7	2	4	4.82894e-06	0.1185	5.8116	SPP1	Osteopontin isoform C
nxp:NX_P10451-1	314	0	35383.2	2	4	4.41372e-06	0.1242	6.2922	SPP1	Osteopontin isoform A
nxp:NX_P10412-1	219	5	21834	32	864	0.00136692	0.3927	1714.36	H1-4	Histone H1.4 isoform Iso 1
nxp:NX_P10321-2	326	2	36566.7	8	26	2.76331e-05	0.2761	43.7668	HLA-C	HLA class I histocompatibility antigen, C alpha chain isoform Iso 2
nxp:NX_P10321-1	366	0	40604.9	7	24	2.27198e-05	0.2514	42.0504	HLA-C	HLA class I histocompatibility antigen, C alpha chain isoform Iso 1
nxp:NX_P10253-1	952	3	105239	3	6	2.18368e-06	0.0315	7.8684	GAA	Lysosomal alpha-glucosidase isoform Iso 1
nxp:NX_P10163-1	310	34	31288.8	44	1562	0.0017458	0.4194	3963.06	PRB4	Basic salivary proline-rich protein 4 isoform Iso 1
nxp:NX_P10153-1	161	13	18324.1	14	131	0.000281916	0.3789	274.498	RNASE2	Non-secretory ribonuclease isoform Iso 1
nxp:NX_P10145-1	99	4	11072.9	4	39	0.000136491	0.4343	63.8813	CXCL8	Interleukin-8 isoform Iso 1
nxp:NX_P0DTE8-1	511	4	57712.9	20	100	6.78036e-05	0.4501	158.003	AMY1C	Alpha-amylase 1C isoform Iso 1
nxp:NX_P0DTE1-1	115	1	12645.4	3	16	4.82054e-05	0.1652	21.4456	IGHV3-38-3	Probable non-functional immunoglobulin heavy variable 3-38-3 isoform Iso 1
nxp:NX_P0DPH7-2	418	1	46064.9	29	216	0.000179041	0.5789	378.916	TUBA3C	Tubulin alpha-3C chain isoform Iso 2
nxp:NX_P0DPH7-1	450	0	49909.6	33	228	0.000175548	0.6067	402.548	TUBA3C	Tubulin alpha-3C chain isoform Iso 1
nxp:NX_P0DP23-1	149	21	16808.8	22	293	0.000681327	0.7852	587.371	CALM1	Calmodulin-1 isoform Iso 1
nxp:NX_P0DP09-1	117	7	12543.3	13	53	0.000156951	0.641	107.645	IGKV1-13	Immunoglobulin kappa variable 1-13 isoform Iso 1
nxp:NX_P0DP08-1	117	3	12989.6	12	137	0.000405703	0.6154	239.597	IGHV4-38-2	Immunoglobulin heavy variable 4-38-2 isoform Iso 1
nxp:NX_P0DP07-1	118	0	13068.7	10	131	0.000384648	0.4407	227.693	IGHV4-31	Immunoglobulin heavy variable 4-31 isoform Iso 1
nxp:NX_P0DP06-1	118	2	13129.7	12	135	0.000396393	0.5763	233.509	IGHV4-30-4	Immunoglobulin heavy variable 4-30-4 isoform Iso 1
nxp:NX_P0DP04-1	118	0	12990.4	14	140	0.000411074	0.6356	252.089	IGHV3-43D	Immunoglobulin heavy variable 3-43D isoform Iso 1
nxp:NX_P0DP02-1	117	7	12962.5	18	364	0.00107793	0.7009	737.995	IGHV3-30-3	Immunoglobulin heavy variable 3-30-3 isoform Iso 1
nxp:NX_P0DP01-1	117	1	12965.3	5	129	0.000382013	0.3248	247.977	IGHV1-8	Immunoglobulin heavy variable 1-8 isoform Iso 1
nxp:NX_P0DOY3-1	106	3	11240.5	52	3210	0.0104924	0.9623	6830.7	IGLC3	Immunoglobulin lambda constant 3 isoform Iso 1
nxp:NX_P0DOY2-1	106	17	11268.5	51	3238	0.0105839	0.9623	6863.09	IGLC2	Immunoglobulin lambda constant 2 isoform Iso 1
nxp:NX_P0DN37-1	164	0	18136.1	3	26	5.49292e-05	0.0976	35.9442	PPIAL4G	Peptidyl-prolyl cis-trans isomerase A-like 4G isoform Iso 1
nxp:NX_P0DMV8-2	586	17	63879.9	64	589	0.00034825	0.6655	1144.79	HSPA1A	Heat shock 70 kDa protein 1A isoform Iso 2
nxp:NX_P0DMV8-1	641	5	69991	68	615	0.000332423	0.6646	1208.89	HSPA1A	Heat shock 70 kDa protein 1A isoform Iso 1
nxp:NX_P0DJI9-2	83	7	9160.5	10	86	0.000359	0.4217	149.096	SAA2	Serum amyloid A-2 protein isoform Iso 2
nxp:NX_P0DJI9-1	122	5	13500.6	13	84	0.000238558	0.5656	150.336	SAA2	Serum amyloid A-2 protein isoform Iso 1
nxp:NX_P0DJI8-1	122	13	13505.5	21	192	0.000545275	0.7049	408.98	SAA1	Serum amyloid A-1 protein isoform Iso 1
nxp:NX_P0CG48-1	685	0	76973.5	12	464	0.000234694	0.0964	749.66	UBC	Polyubiquitin-C isoform Iso 1
nxp:NX_P0CG47-1	229	0	25727.8	12	464	0.000702031	0.2882	749.66	UBB	Polyubiquitin-B isoform Iso 1
nxp:NX_P0CG39-1	1038	1	117297	65	2081	0.000694622	0.158	4071.66	POTEJ	POTE ankyrin domain family member J isoform Iso 1
nxp:NX_P0CG38-1	1075	0	121186	74	2471	0.000796413	0.1423	4797.4	POTEI	POTE ankyrin domain family member I isoform Iso 1
nxp:NX_P0CF74-1	106	3	11251.5	28	2095	0.00684782	0.7925	4413.2	IGLC6	Immunoglobulin lambda constant 6 isoform Iso 1
nxp:NX_P0C0S8-1	130	0	14064.9	28	1505	0.00401113	0.5846	2722.16	H2AC11	Histone H2A type 1 isoform Iso 1
nxp:NX_P0C0S5-1	128	0	13526.5	5	479	0.00129658	0.3125	805.676	H2AZ1	Histone H2A.Z isoform Iso 1
nxp:NX_P0C0L5-1	1744	10	192612	160	1246	0.00024754	0.6749	2411.07	C4B	Complement C4-B isoform Iso 1
nxp:NX_P0C0L4-2	1698	54	187568	166	1297	0.000264653	0.6614	2483.11	C4A	Complement C4-A isoform Iso 2
nxp:NX_P0C0L4-1	1744	3	192646	154	1223	0.000242971	0.6594	2365.71	C4A	Complement C4-A isoform Iso 1
nxp:NX_P09972-1	364	10	39413.2	16	99	9.4234e-05	0.2885	168.707	ALDOC	Fructose-bisphosphate aldolase C isoform Iso 1
nxp:NX_P09960-4	587	1	66791.3	27	157	9.26692e-05	0.4617	262.392	LTA4H	Leukotriene A-4 hydrolase isoform Iso 4
nxp:NX_P09960-3	508	8	57245.3	25	120	8.18449e-05	0.4705	191.261	LTA4H	Leukotriene A-4 hydrolase isoform Iso 3
nxp:NX_P09960-2	532	3	59677.2	26	134	8.72704e-05	0.5357	213.68	LTA4H	Leukotriene A-4 hydrolase isoform Iso 2
nxp:NX_P09960-1	611	2	69223.2	31	179	0.000101505	0.5221	301.381	LTA4H	Leukotriene A-4 hydrolase isoform Iso 1
nxp:NX_P09917-4	533	0	61187.2	3	10	6.5005e-06	0.0863	16.5544	ALOX5	Polyunsaturated fatty acid 5-lipoxygenase isoform Iso 4
nxp:NX_P09917-3	642	0	74569.6	4	14	7.55557e-06	0.0888	22.958	ALOX5	Polyunsaturated fatty acid 5-lipoxygenase isoform Iso 3
nxp:NX_P09917-2	617	0	71500.1	4	14	7.86171e-06	0.0924	22.958	ALOX5	Polyunsaturated fatty acid 5-lipoxygenase isoform Iso 2
nxp:NX_P09917-1	674	0	77915.3	4	14	7.19684e-06	0.0846	22.958	ALOX5	Polyunsaturated fatty acid 5-lipoxygenase isoform Iso 1
nxp:NX_P09914-1	478	4	55307.2	4	8	5.79877e-06	0.1172	12.0196	IFIT1	Interferon-induced protein with tetratricopeptide repeats 1 isoform Iso 1
nxp:NX_P09871-1	688	13	76616.8	13	44	2.21584e-05	0.1904	74.7917	C1S	Complement C1s subcomponent isoform Iso 1
nxp:NX_P09758-1	323	6	35668.6	6	20	2.14537e-05	0.2477	28.0228	TACSTD2	Tumor-associated calcium signal transducer 2 isoform Iso 1
nxp:NX_P09668-1	335	11	37351	11	44	4.55074e-05	0.4448	77.3128	CTSH	Pro-cathepsin H isoform Iso 1
nxp:NX_P09651-3	267	1	29350.2	6	42	5.45019e-05	0.2509	72.221	HNRNPA1	Heterogeneous nuclear ribonucleoprotein A1 isoform Iso 2
nxp:NX_P09651-2	320	0	34157.2	5	40	4.33096e-05	0.1375	69.749	HNRNPA1	Heterogeneous nuclear ribonucleoprotein A1 isoform A1-A
nxp:NX_P09651-1	372	0	38705	5	40	3.72556e-05	0.1183	69.749	HNRNPA1	Heterogeneous nuclear ribonucleoprotein A1 isoform A1-B
nxp:NX_P09622-3	461	0	49233.4	4	8	6.01261e-06	0.1518	15.6006	DLD	Dihydrolipoyl dehydrogenase, mitochondrial isoform Iso 3
nxp:NX_P09622-1	509	2	54125	6	18	1.22526e-05	0.1749	28.673	DLD	Dihydrolipoyl dehydrogenase, mitochondrial isoform Iso 1
nxp:NX_P09603-3	256	0	29178.6	3	8	1.08274e-05	0.1445	12.9236	CSF1	Macrophage colony-stimulating factor 1 isoform Iso 3
nxp:NX_P09603-2	438	0	47854.5	3	8	6.32834e-06	0.0845	12.9236	CSF1	Macrophage colony-stimulating factor 1 isoform Iso 2
nxp:NX_P09603-1	554	0	60123.8	3	8	5.00327e-06	0.0668	12.9236	CSF1	Macrophage colony-stimulating factor 1 isoform Iso 1
nxp:NX_P09543-1	421	1	47530.7	1	4	3.29194e-06	0.0261	10.3078	CNP	2',3'-cyclic-nucleotide 3'-phosphodiesterase isoform CNPII
nxp:NX_P09525-1	319	15	35842.1	15	56	6.08235e-05	0.4201	110.715	ANXA4	Annexin A4 isoform Iso 1
nxp:NX_P09493-9	284	0	32698.6	14	174	0.000212278	0.2254	335.421	TPM1	Tropomyosin alpha-1 chain isoform Iso 9
nxp:NX_P09493-8	284	0	32778.7	14	174	0.000212278	0.2254	335.421	TPM1	Tropomyosin alpha-1 chain isoform Iso 8
nxp:NX_P09493-7	284	0	32639.6	14	174	0.000212278	0.2254	335.421	TPM1	Tropomyosin alpha-1 chain isoform Iso 7
nxp:NX_P09493-6	284	0	32611.6	14	174	0.000212278	0.2254	335.421	TPM1	Tropomyosin alpha-1 chain isoform Iso 6
nxp:NX_P09493-5	245	1	28350.5	15	180	0.000254554	0.3102	344.914	TPM1	Tropomyosin alpha-1 chain isoform Iso 5
nxp:NX_P09493-4	284	0	32809.8	14	174	0.000212278	0.2254	335.421	TPM1	Tropomyosin alpha-1 chain isoform Iso 4
nxp:NX_P09493-3	284	0	32837.7	14	174	0.000212278	0.2254	335.421	TPM1	Tropomyosin alpha-1 chain isoform Iso 3
nxp:NX_P09493-2	228	7	26645.5	16	190	0.000288731	0.2807	358.26	TPM1	Tropomyosin alpha-1 chain isoform Iso 2
nxp:NX_P09493-10	284	0	32827.7	14	174	0.000212278	0.2254	335.421	TPM1	Tropomyosin alpha-1 chain isoform Iso 10
nxp:NX_P09493-1	284	0	32670.7	14	174	0.000212278	0.2254	335.421	TPM1	Tropomyosin alpha-1 chain isoform Iso 1
nxp:NX_P09471-2	354	0	40043.1	2	4	3.91499e-06	0.0593	6.6388	GNAO1	Guanine nucleotide-binding protein G(o) subunit alpha isoform Alpha-2
nxp:NX_P09471-1	354	0	40006.9	2	4	3.91499e-06	0.0593	6.6388	GNAO1	Guanine nucleotide-binding protein G(o) subunit alpha isoform Alpha-1
nxp:NX_P09429-1	215	10	24860.2	24	466	0.000750968	0.586	838.108	HMGB1	High mobility group protein B1 isoform Iso 1
nxp:NX_P09382-1	135	6	14688.2	6	20	5.13299e-05	0.5111	31.8562	LGALS1	Galectin-1 isoform Iso 1
nxp:NX_P09341-1	107	5	11276.2	5	28	9.06668e-05	0.3178	46.323	CXCL1	Growth-regulated alpha protein isoform Iso 1
nxp:NX_P09237-1	267	2	29639.9	2	4	5.19066e-06	0.0974	5.6064	MMP7	Matrilysin isoform Iso 1
nxp:NX_P09228-1	141	0	16416.2	3	14	3.44019e-05	0.1915	25.861	CST2	Cystatin-SA isoform Iso 1
nxp:NX_P09211-1	210	28	23323	28	269	0.00044382	0.7429	578.123	GSTP1	Glutathione S-transferase P isoform Iso 1
nxp:NX_P09210-1	222	0	25629.6	8	24	3.74569e-05	0.3694	41.5648	GSTA2	Glutathione S-transferase A2 isoform Iso 1
nxp:NX_P09104-2	391	0	42662.6	14	182	0.000161276	0.1867	394.066	ENO2	Gamma-enolase isoform Iso 2
nxp:NX_P09104-1	434	0	47221	15	184	0.000146893	0.1728	397.986	ENO2	Gamma-enolase isoform Iso 1
nxp:NX_P08962-2	215	1	23395.8	7	40	6.44608e-05	0.214	56.7314	CD63	CD63 antigen isoform Iso 2
nxp:NX_P08962-1	238	0	25601.1	6	38	5.53198e-05	0.1555	54.7372	CD63	CD63 antigen isoform Iso 1
nxp:NX_P08779-1	473	5	51218.2	41	795	0.000582344	0.759	1307.58	KRT16	Keratin, type I cytoskeletal 16 isoform Iso 1
nxp:NX_P08758-1	320	23	35896.4	23	169	0.000182983	0.675	326.993	ANXA5	Annexin A5 isoform Iso 1
nxp:NX_P08754-1	354	2	40488.3	6	16	1.566e-05	0.1921	24.4096	GNAI3	Guanine nucleotide-binding protein G(i) subunit alpha isoform Iso 1
nxp:NX_P08729-1	469	3	51336.3	19	122	9.01282e-05	0.3774	203.288	KRT7	Keratin, type II cytoskeletal 7 isoform Iso 1
nxp:NX_P08727-1	400	23	44061.1	47	543	0.000470342	0.76	900.859	KRT19	Keratin, type I cytoskeletal 19 isoform Iso 1
nxp:NX_P08697-2	427	2	47858.6	15	96	7.78964e-05	0.4614	182.777	SERPINF2	Alpha-2-antiplasmin isoform Iso 2
nxp:NX_P08697-1	491	4	54513.1	17	120	8.46786e-05	0.4257	217.747	SERPINF2	Alpha-2-antiplasmin isoform Iso 1
nxp:NX_P08670-1	466	96	53601.1	103	1221	0.000907828	0.9292	2292.34	VIM	Vimentin isoform Iso 1
nxp:NX_P08637-1	254	2	29052.7	7	92	0.000125495	0.2677	144.406	FCGR3A	Low affinity immunoglobulin gamma Fc region receptor III-A isoform Iso 1
nxp:NX_P08603-2	449	14	50982.1	55	781	0.000602669	0.8731	1370.23	CFH	Complement factor H isoform Iso 2
nxp:NX_P08603-1	1231	60	138987	127	1639	0.000461312	0.7238	2893.35	CFH	Complement factor H isoform Iso 1
nxp:NX_P08575-9	1192	0	135615	19	78	2.26721e-05	0.1628	124.061	PTPRC	Receptor-type tyrosine-protein phosphatase C isoform Iso 7
nxp:NX_P08575-8	1211	0	137929	19	78	2.23164e-05	0.1602	124.061	PTPRC	Receptor-type tyrosine-protein phosphatase C isoform Iso 6
nxp:NX_P08575-7	1240	0	140476	19	78	2.17945e-05	0.1565	124.061	PTPRC	Receptor-type tyrosine-protein phosphatase C isoform Iso 5
nxp:NX_P08575-6	1259	0	142790	19	78	2.14656e-05	0.1541	124.061	PTPRC	Receptor-type tyrosine-protein phosphatase C isoform Iso 4
nxp:NX_P08575-5	1258	0	142516	19	78	2.14827e-05	0.1542	124.061	PTPRC	Receptor-type tyrosine-protein phosphatase C isoform Iso 3
nxp:NX_P08575-4	1145	1	131029	19	80	2.4208e-05	0.1694	126.936	PTPRC	Receptor-type tyrosine-protein phosphatase C isoform Iso 2
nxp:NX_P08575-3	1306	0	147376	19	78	2.06931e-05	0.1485	124.061	PTPRC	Receptor-type tyrosine-protein phosphatase C isoform Iso 1
nxp:NX_P08575-10	1193	0	135890	19	78	2.26531e-05	0.1626	124.061	PTPRC	Receptor-type tyrosine-protein phosphatase C isoform Iso 8
nxp:NX_P08571-1	375	11	40032.7	11	50	4.61969e-05	0.3653	88.7648	CD14	Monocyte differentiation antigen CD14 isoform Iso 1
nxp:NX_P08567-1	350	1	40081.4	1	2	1.97987e-06	0.0429	4.6172	PLEK	Pleckstrin isoform Iso 1
nxp:NX_P08519-1	4548	4	500977	7	68	5.18039e-06	0.0136	114.187	LPA	Apolipoprotein(a) isoform Iso 1
nxp:NX_P08311-1	255	59	28801.1	59	2356	0.00320117	0.7255	3903.64	CTSG	Cathepsin G isoform Iso 1
nxp:NX_P08294-1	240	7	25816.7	7	14	2.02111e-05	0.4958	22.3068	SOD3	Extracellular superoxide dismutase [Cu-Zn] isoform Iso 1
nxp:NX_P08263-1	222	2	25596.7	10	28	4.36998e-05	0.4324	48.2214	GSTA1	Glutathione S-transferase A1 isoform Iso 1
nxp:NX_P08253-3	610	1	68769	2	12	6.81593e-06	0.0197	17.8216	MMP2	72 kDa type IV collagenase isoform Iso 3
nxp:NX_P08253-1	660	0	73816.7	1	8	4.19972e-06	0.0182	12.9612	MMP2	72 kDa type IV collagenase isoform Iso 1
nxp:NX_P08246-1	267	64	28481.8	64	1787	0.00231893	0.6479	3163.48	ELANE	Neutrophil elastase isoform Iso 1
nxp:NX_P08238-1	724	22	83194.1	50	403	0.000192859	0.4862	733.723	HSP90AB1	Heat shock protein HSP 90-beta isoform Iso 1
nxp:NX_P08185-1	405	8	45093.9	8	38	3.25089e-05	0.2617	58.4406	SERPINA6	Corticosteroid-binding globulin isoform Iso 1
nxp:NX_P08174-7	551	0	58982.8	16	140	8.8034e-05	0.3848	218.974	CD55	Complement decay-accelerating factor isoform Iso 7
nxp:NX_P08174-6	525	0	56164.3	16	140	9.23938e-05	0.4038	218.974	CD55	Complement decay-accelerating factor isoform Iso 6
nxp:NX_P08174-5	439	0	48464.2	16	140	0.000110494	0.4829	218.974	CD55	Complement decay-accelerating factor isoform Iso 5
nxp:NX_P08174-4	364	6	39715.7	19	154	0.000146586	0.5852	236.011	CD55	Complement decay-accelerating factor isoform Iso 4
nxp:NX_P08174-3	384	0	41854.8	16	140	0.00012632	0.5521	218.974	CD55	Complement decay-accelerating factor isoform Iso 3
nxp:NX_P08174-2	440	0	48668.2	16	140	0.000110243	0.4818	218.974	CD55	Complement decay-accelerating factor isoform Iso 1
nxp:NX_P08174-1	381	0	41355.6	16	140	0.000127314	0.5564	218.974	CD55	Complement decay-accelerating factor isoform Iso 2
nxp:NX_P08134-1	193	1	21974.2	12	131	0.000235173	0.4041	226.887	RHOC	Rho-related GTP-binding protein RhoC isoform Iso 1
nxp:NX_P08133-1	673	44	75807.6	44	236	0.000121498	0.6523	397.192	ANXA6	Annexin A6 isoform Iso 1
nxp:NX_P08118-2	77	1	8754.5	2	251	0.00112942	0.2078	444.307	MSMB	Beta-microseminoprotein isoform PSP57
nxp:NX_P08118-1	114	22	12838.1	24	650	0.00197552	0.7807	1306.48	MSMB	Beta-microseminoprotein isoform PSP94
nxp:NX_P07998-1	156	18	17614.7	18	271	0.000601892	0.6667	526.105	RNASE1	Ribonuclease pancreatic isoform Iso 1
nxp:NX_P07996-2	1085	0	120053	3	9	2.874e-06	0.0442	16.0414	THBS1	Thrombospondin-1 isoform Iso 2
nxp:NX_P07996-1	1170	0	129282	3	9	2.6652e-06	0.041	16.0414	THBS1	Thrombospondin-1 isoform Iso 1
nxp:NX_P07988-1	381	84	42070.9	84	1178	0.00107126	0.79	2422.04	SFTPB	Pulmonary surfactant-associated protein B isoform Iso 1
nxp:NX_P07951-3	248	0	28648.5	14	175	0.00024449	0.2419	336.352	TPM2	Tropomyosin beta chain isoform Iso 3
nxp:NX_P07951-2	284	0	32951.6	14	175	0.000213498	0.2113	336.352	TPM2	Tropomyosin beta chain isoform Iso 2
nxp:NX_P07951-1	284	0	32812.6	14	175	0.000213498	0.2113	336.352	TPM2	Tropomyosin beta chain isoform Iso 1
nxp:NX_P07919-1	91	1	10713.9	1	8	3.04595e-05	0.1978	14.8518	UQCRH	Cytochrome b-c1 complex subunit 6, mitochondrial isoform Iso 1
nxp:NX_P07910-4	250	0	27786.4	4	22	3.04899e-05	0.26	45.1892	HNRNPC	Heterogeneous nuclear ribonucleoproteins C1/C2 isoform Iso 4
nxp:NX_P07910-3	226	3	25197.1	6	34	5.21248e-05	0.2788	67.3116	HNRNPC	Heterogeneous nuclear ribonucleoproteins C1/C2 isoform Iso 3
nxp:NX_P07910-2	293	0	32299.9	5	32	3.78405e-05	0.2594	69.5686	HNRNPC	Heterogeneous nuclear ribonucleoproteins C1/C2 isoform C1
nxp:NX_P07910-1	306	0	33631.5	5	32	3.62328e-05	0.2484	69.5686	HNRNPC	Heterogeneous nuclear ribonucleoproteins C1/C2 isoform C2
nxp:NX_P07900-2	854	52	98081.5	78	662	0.00026858	0.548	1236.75	HSP90AA1	Heat shock protein HSP 90-alpha isoform Iso 2
nxp:NX_P07864-1	332	1	36270.2	4	119	0.000124189	0.0572	205.398	LDHC	L-lactate dehydrogenase C chain isoform Iso 1
nxp:NX_P07858-1	339	28	37778.8	28	120	0.000122647	0.5782	236.298	CTSB	Cathepsin B isoform Iso 1
nxp:NX_P07814-1	1512	2	170465	2	4	9.16605e-07	0.0198	6.2596	EPRS1	Bifunctional glutamate/proline--tRNA ligase isoform Iso 1
nxp:NX_P07738-1	259	3	29968.5	3	6	8.02649e-06	0.1236	9.0952	BPGM	Bisphosphoglycerate mutase isoform Iso 1
nxp:NX_P07737-1	140	58	15026.5	58	904	0.00223725	0.9	1783.66	PFN1	Profilin-1 isoform Iso 1
nxp:NX_P07711-1	333	4	37521.7	4	10	1.04047e-05	0.1111	19.8514	CTSL	Procathepsin L isoform Iso 1
nxp:NX_P07686-1	556	14	63053.2	14	42	2.61727e-05	0.2842	69.6704	HEXB	Beta-hexosaminidase subunit beta isoform Iso 1
nxp:NX_P07602-3	527	0	58427	41	513	0.000337272	0.5579	894.39	PSAP	Prosaposin isoform Sap-mu-9
nxp:NX_P07602-2	526	0	58298.9	41	513	0.000337914	0.5589	894.39	PSAP	Prosaposin isoform Sap-mu-6
nxp:NX_P07602-1	524	21	58055.8	53	599	0.000396068	0.6412	1023.88	PSAP	Prosaposin isoform Sap-mu-0
nxp:NX_P07478-1	247	0	26453	2	4	5.61096e-06	0.081	6.2268	PRSS2	Trypsin-2 isoform Iso 1
nxp:NX_P07477-1	247	0	26523.1	2	4	5.61096e-06	0.081	6.2268	PRSS1	Trypsin-1 isoform Iso 1
nxp:NX_P07437-1	444	18	49621	49	472	0.000368327	0.6216	806.562	TUBB	Tubulin beta chain isoform Iso 1
nxp:NX_P07384-1	714	18	81820.2	18	54	2.62041e-05	0.2507	86.0786	CAPN1	Calpain-1 catalytic subunit isoform Iso 1
nxp:NX_P07360-1	202	5	22245.5	5	18	3.08742e-05	0.396	33.3198	C8G	Complement component C8 gamma chain isoform Iso 1
nxp:NX_P07358-1	591	5	66985.5	5	14	8.20757e-06	0.1184	26.5635	C8B	Complement component C8 beta chain isoform Iso 1
nxp:NX_P07357-1	584	14	65103	14	50	2.96641e-05	0.2055	89.6042	C8A	Complement component C8 alpha chain isoform Iso 1
nxp:NX_P07355-2	357	9	40367.7	25	337	0.000327066	0.6499	666.212	ANXA2	Annexin A2 isoform Iso 2
nxp:NX_P07339-1	412	31	44505.6	31	242	0.000203513	0.682	441.522	CTSD	Cathepsin D isoform Iso 1
nxp:NX_P07305-2	177	3	19137.3	6	56	0.00010962	0.3051	81.94	H1-0	Histone H1.0 isoform Iso 2
nxp:NX_P07305-1	194	1	20832.2	6	57	0.0001018	0.2835	85.4185	H1-0	Histone H1.0 isoform Iso 1
nxp:NX_P07237-1	508	42	57062.7	42	309	0.000210751	0.6634	547.887	P4HB	Protein disulfide-isomerase isoform Iso 1
nxp:NX_P07225-1	676	3	75055.9	3	8	4.10032e-06	0.0725	11.3844	PROS1	Vitamin K-dependent protein S isoform Iso 1
nxp:NX_P07205-1	417	0	44749.3	8	71	5.89924e-05	0.1487	129.587	PGK2	Phosphoglycerate kinase 2 isoform Iso 1
nxp:NX_P07197-1	916	0	102392	1	12	4.539e-06	0.0131	27.965	NEFM	Neurofilament medium polypeptide isoform Iso 1
nxp:NX_P07195-1	334	17	36597.1	20	226	0.000234442	0.497	382.445	LDHB	L-lactate dehydrogenase B chain isoform Iso 1
nxp:NX_P07108-6	123	0	13884.1	2	8	2.25351e-05	0.1301	16.786	DBI	Acyl-CoA-binding protein isoform Iso 6
nxp:NX_P07108-5	148	0	16466.4	8	24	5.61854e-05	0.4324	42.2332	DBI	Acyl-CoA-binding protein isoform Iso 5
nxp:NX_P07108-4	129	0	14340.2	8	24	6.44608e-05	0.4961	42.2332	DBI	Acyl-CoA-binding protein isoform Iso 4
nxp:NX_P07108-3	88	0	10120.1	8	24	9.44936e-05	0.7273	42.2332	DBI	Acyl-CoA-binding protein isoform Iso 3
nxp:NX_P07108-2	104	0	11767.9	8	24	7.99561e-05	0.6154	42.2332	DBI	Acyl-CoA-binding protein isoform Iso 2
nxp:NX_P07108-1	87	2	10020	8	28	0.00011151	0.7356	47.1092	DBI	Acyl-CoA-binding protein isoform Iso 1
nxp:NX_P06899-1	126	0	13877.6	49	3248	0.0089314	0.8175	6055.17	H2BC11	Histone H2B type 1-J isoform Iso 1
nxp:NX_P06865-2	168	0	19295.3	2	8	1.64989e-05	0.119	12.6668	HEXA	Beta-hexosaminidase subunit alpha isoform Iso 2
nxp:NX_P06865-1	529	7	60646.3	9	22	1.44092e-05	0.1607	35.8814	HEXA	Beta-hexosaminidase subunit alpha isoform Iso 1
nxp:NX_P06753-6	248	0	28886.7	38	492	0.000687365	0.6935	975.389	TPM3	Tropomyosin alpha-3 chain isoform Iso 6
nxp:NX_P06753-5	248	5	28834.7	38	500	0.000698542	0.7621	998.784	TPM3	Tropomyosin alpha-3 chain isoform Iso 5
nxp:NX_P06753-4	247	0	28757.8	33	419	0.000587748	0.6316	839.98	TPM3	Tropomyosin alpha-3 chain isoform Iso 4
nxp:NX_P06753-3	247	14	28919.8	45	524	0.000735035	0.7004	1024.8	TPM3	Tropomyosin alpha-3 chain isoform Iso 3
nxp:NX_P06753-2	248	0	28996.7	41	564	0.000787955	0.7782	1122.27	TPM3	Tropomyosin alpha-3 chain isoform Iso 2
nxp:NX_P06753-1	285	2	32911.8	26	323	0.000392674	0.4491	625.178	TPM3	Tropomyosin alpha-3 chain isoform Iso 1
nxp:NX_P06748-3	259	2	28364.7	13	66	8.82913e-05	0.417	133.2	NPM1	Nucleophosmin isoform Iso 3
nxp:NX_P06748-2	265	2	29428.2	17	81	0.000105904	0.4868	155.237	NPM1	Nucleophosmin isoform Iso 2
nxp:NX_P06748-1	294	0	32536.8	17	77	9.07439e-05	0.4388	149.694	NPM1	Nucleophosmin isoform Iso 1
nxp:NX_P06744-2	569	0	64265.9	56	330	0.000200944	0.7065	598.316	GPI	Glucose-6-phosphate isomerase isoform Iso 2
nxp:NX_P06744-1	558	25	63089.2	68	408	0.000253338	0.8029	717.833	GPI	Glucose-6-phosphate isomerase isoform Iso 1
nxp:NX_P06737-2	813	10	93057.1	22	60	2.55702e-05	0.2768	91.0498	PYGL	Glycogen phosphorylase, liver form isoform Iso 2
nxp:NX_P06737-1	847	0	97069	13	40	1.63625e-05	0.1877	62.561	PYGL	Glycogen phosphorylase, liver form isoform Iso 1
nxp:NX_P06733-1	434	91	47121.3	107	1164	0.00092926	0.8594	2186.21	ENO1	Alpha-enolase isoform alpha-enolase
nxp:NX_P06732-1	381	3	43055.9	3	6	5.45632e-06	0.0997	11.41	CKM	Creatine kinase M-type isoform Iso 1
nxp:NX_P06731-2	701	1	76658.2	7	77	3.80581e-05	0.1469	125.565	CEACAM5	Carcinoembryonic antigen-related cell adhesion molecule 5 isoform Iso 2
nxp:NX_P06731-1	702	0	76729.2	7	75	3.70167e-05	0.1467	122.025	CEACAM5	Carcinoembryonic antigen-related cell adhesion molecule 5 isoform Iso 1
nxp:NX_P06727-1	396	18	45326.4	18	82	7.17452e-05	0.4318	141.045	APOA4	Apolipoprotein A-IV isoform Iso 1
nxp:NX_P06703-1	90	26	10155.3	26	247	0.000950886	0.9778	398.889	S100A6	Protein S100-A6 isoform Iso 1
nxp:NX_P06702-1	114	160	13215.5	160	8079	0.0245543	0.9649	18018.8	S100A9	Protein S100-A9 isoform Iso 1
nxp:NX_P06681-3	620	0	69381.7	12	46	2.57063e-05	0.2065	81.5972	C2	Complement C2 isoform Iso 3
nxp:NX_P06681-2	538	1	60261	11	46	2.96244e-05	0.2212	80.5722	C2	Complement C2 isoform Iso 2
nxp:NX_P06681-1	752	3	83196.3	15	58	2.67229e-05	0.2061	97.8332	C2	Complement C2 isoform Iso 1
nxp:NX_P06576-1	529	12	56506.6	12	40	2.61986e-05	0.2987	69.0846	ATP5F1B	ATP synthase subunit beta, mitochondrial isoform Iso 1
nxp:NX_P06454-2	110	3	12048.9	8	44	0.000138591	0.3545	81.6844	PTMA	Prothymosin alpha isoform Iso 2
nxp:NX_P06454-1	111	0	12178	6	38	0.000118614	0.2342	74.7604	PTMA	Prothymosin alpha isoform Iso 1
nxp:NX_P06396-4	739	39	81415.9	105	1061	0.000497445	0.7077	2035.61	GSN	Gelsolin isoform Iso 4
nxp:NX_P06396-3	742	0	81872	91	947	0.000442201	0.6995	1842.85	GSN	Gelsolin isoform Iso 3
nxp:NX_P06396-1	782	4	85626.2	95	955	0.000423127	0.6957	1863.66	GSN	Gelsolin isoform Iso 1
nxp:NX_P06331-1	123	1	13788	9	135	0.000380279	0.4228	240.667	IGHV4-34	Immunoglobulin heavy variable 4-34 isoform Iso 1
nxp:NX_P06312-1	121	8	13353.6	10	137	0.000392292	0.6198	272.337	IGKV4-1	Immunoglobulin kappa variable 4-1 isoform Iso 1
nxp:NX_P06310-1	120	2	13158.5	7	117	0.000337815	0.5083	234.658	IGKV2-30	Immunoglobulin kappa variable 2-30 isoform Iso 1
nxp:NX_P05787-2	511	1	56555.4	42	343	0.000232567	0.546	594.565	KRT8	Keratin, type II cytoskeletal 8 isoform Iso 2
nxp:NX_P05783-1	430	9	48010.5	11	60	4.83456e-05	0.2884	103.047	KRT18	Keratin, type I cytoskeletal 18 isoform Iso 1
nxp:NX_P05546-1	499	6	57016.2	6	16	1.11095e-05	0.0902	20.1902	SERPIND1	Heparin cofactor 2 isoform Iso 1
nxp:NX_P05543-1	415	8	46276.6	8	24	2.00372e-05	0.2434	39.1062	SERPINA7	Thyroxine-binding globulin isoform Iso 1
nxp:NX_P05452-1	202	3	22504.3	3	8	1.37218e-05	0.2079	13.1908	CLEC3B	Tetranectin isoform Iso 1
nxp:NX_P05451-1	166	0	18700.8	1	4	8.34883e-06	0.0663	4.9354	REG1A	Lithostathine-1-alpha isoform Iso 1
nxp:NX_P05388-2	255	0	27400.3	3	6	8.15239e-06	0.1294	9.7422	RPLP0	60S acidic ribosomal protein P0 isoform Iso 2
nxp:NX_P05388-1	317	0	34233.8	3	6	6.55792e-06	0.1041	9.7422	RPLP0	60S acidic ribosomal protein P0 isoform Iso 1
nxp:NX_P05387-1	115	6	11639.8	7	28	8.43595e-05	0.7739	47.9474	RPLP2	60S acidic ribosomal protein P2 isoform Iso 1
nxp:NX_P05386-1	114	1	11488.7	2	6	1.82356e-05	0.2895	8.4038	RPLP1	60S acidic ribosomal protein P1 isoform Iso 1
nxp:NX_P05362-1	532	14	57770.9	14	72	4.68916e-05	0.2895	107.173	ICAM1	Intercellular adhesion molecule 1 isoform Iso 1
nxp:NX_P05204-1	90	16	9369	22	308	0.00118572	0.5333	691.001	HMGN2	Non-histone chromosomal protein HMG-17 isoform Iso 1
nxp:NX_P05186-2	447	3	48860	13	46	3.56553e-05	0.3132	83.514	ALPL	Alkaline phosphatase, tissue-nonspecific isozyme isoform Iso 2
nxp:NX_P05186-1	524	4	57250.6	13	54	3.57056e-05	0.3034	92.2498	ALPL	Alkaline phosphatase, tissue-nonspecific isozyme isoform Iso 1
nxp:NX_P05164-3	777	0	87174.5	120	4176	0.00186214	0.6486	7610.66	MPO	Myeloperoxidase isoform H7
nxp:NX_P05164-1	745	46	83796.8	132	4398	0.00204537	0.6832	7995.08	MPO	Myeloperoxidase isoform H17
nxp:NX_P05161-1	165	3	17858.3	3	8	1.67989e-05	0.1879	13.003	ISG15	Ubiquitin-like protein ISG15 isoform Iso 1
nxp:NX_P05156-1	583	41	65688.6	41	340	0.000202062	0.4597	576.992	CFI	Complement factor I isoform Iso 1
nxp:NX_P05155-3	505	0	55715.7	32	438	0.000300508	0.495	808.973	SERPING1	Plasma protease C1 inhibitor isoform Iso 3
nxp:NX_P05155-1	500	15	55101.4	40	470	0.000325688	0.526	859.579	SERPING1	Plasma protease C1 inhibitor isoform Iso 1
nxp:NX_P05114-1	100	9	10634.6	9	60	0.000207886	0.33	123.856	HMGN1	Non-histone chromosomal protein HMG-14 isoform Iso 1
nxp:NX_P05109-1	93	82	10809.6	82	3424	0.0127563	1	6442.09	S100A8	Protein S100-A8 isoform Iso 1
nxp:NX_P05107-1	769	45	84708.1	45	377	0.000169859	0.5293	614.361	ITGB2	Integrin beta-2 isoform Iso 1
nxp:NX_P05090-1	189	11	21243.8	11	110	0.000201653	0.3651	186.012	APOD	Apolipoprotein D isoform Iso 1
nxp:NX_P05089-3	236	2	25322.4	8	69	0.0001013	0.2797	116.295	ARG1	Arginase-1 isoform Iso 3
nxp:NX_P05089-2	330	0	35623.8	12	77	8.08445e-05	0.3273	132.14	ARG1	Arginase-1 isoform Iso 2
nxp:NX_P05089-1	322	1	34695.3	13	79	8.50051e-05	0.3571	136.196	ARG1	Arginase-1 isoform Iso 1
nxp:NX_P05062-1	364	1	39430	2	36	3.42669e-05	0.0385	51.8732	ALDOB	Fructose-bisphosphate aldolase B isoform Iso 1
nxp:NX_P05026-2	301	2	34852.8	2	4	4.60434e-06	0.0698	5.9448	ATP1B1	Sodium/potassium-transporting ATPase subunit beta-1 isoform Iso 2
nxp:NX_P05023-4	1023	0	112910	2	4	1.35475e-06	0.0283	8.4878	ATP1A1	Sodium/potassium-transporting ATPase subunit alpha-1 isoform Iso 4
nxp:NX_P05023-1	1023	0	112806	2	4	1.35475e-06	0.0283	8.4878	ATP1A1	Sodium/potassium-transporting ATPase subunit alpha-1 isoform Iso 1
nxp:NX_P04908-1	130	5	14108.9	25	1113	0.00296637	0.5692	2045.47	H2AC4	Histone H2A type 1-B/E isoform Iso 1
nxp:NX_P04899-5	339	0	38694.1	14	46	4.70145e-05	0.472	70.3929	GNAI2	Guanine nucleotide-binding protein G(i) subunit alpha-2 isoform Iso 5
nxp:NX_P04899-4	366	0	41503.6	15	53	5.01728e-05	0.4672	83.3298	GNAI2	Guanine nucleotide-binding protein G(i) subunit alpha-2 isoform sGi2
nxp:NX_P04899-3	318	3	36424	15	52	5.66566e-05	0.5786	77.5875	GNAI2	Guanine nucleotide-binding protein G(i) subunit alpha-2 isoform Iso 3
nxp:NX_P04899-2	339	0	38429.8	14	46	4.70145e-05	0.472	70.3929	GNAI2	Guanine nucleotide-binding protein G(i) subunit alpha-2 isoform Iso 2
nxp:NX_P04899-1	355	0	40407	15	53	5.17275e-05	0.4817	83.3298	GNAI2	Guanine nucleotide-binding protein G(i) subunit alpha-2 isoform Iso 1
nxp:NX_P04843-1	607	3	68508.8	3	6	3.42481e-06	0.056	10.4206	RPN1	Dolichyl-diphosphooligosaccharide--protein glycosyltransferase subunit 1 isoform Iso 1
nxp:NX_P04839-1	570	10	65275.6	10	87	5.28833e-05	0.1772	148.37	CYBB	Cytochrome b-245 heavy chain isoform Iso 1
nxp:NX_P04792-1	205	11	22750.5	11	52	8.78868e-05	0.5659	104.991	HSPB1	Heat shock protein beta-1 isoform Iso 1
nxp:NX_P04746-2	265	3	30264.7	10	50	6.53729e-05	0.3283	77.742	AMY2A	Pancreatic alpha-amylase isoform Iso 2
nxp:NX_P04746-1	511	2	57652	17	90	6.10233e-05	0.3816	140.812	AMY2A	Pancreatic alpha-amylase isoform Iso 1
nxp:NX_P04732-1	61	0	5991.2	2	8	4.54396e-05	0.2131	14.6724	MT1E	Metallothionein-1E isoform Iso 1
nxp:NX_P04632-1	268	10	28279.7	10	32	4.13703e-05	0.4216	53.996	CAPNS1	Calpain small subunit 1 isoform Iso 1
nxp:NX_P04439-2	371	0	41350.5	11	42	3.92238e-05	0.3127	75.626	HLA-A	HLA class I histocompatibility antigen, A alpha chain isoform Iso 2
nxp:NX_P04439-1	365	1	40797.2	12	44	4.1767e-05	0.3178	78.7412	HLA-A	HLA class I histocompatibility antigen, A alpha chain isoform Iso 1
nxp:NX_P04433-1	115	0	12549.3	13	173	0.000521221	0.7391	346.549	IGKV3-11	Immunoglobulin kappa variable 3-11 isoform Iso 1
nxp:NX_P04430-1	117	7	12592.2	8	179	0.00053008	0.4615	430.399	IGKV1-16	Immunoglobulin kappa variable 1-16 isoform Iso 1
nxp:NX_P04406-1	335	117	36012.4	120	1254	0.00129696	0.9731	2277.34	GAPDH	Glyceraldehyde-3-phosphate dehydrogenase isoform Iso 1
nxp:NX_P04350-1	444	2	49535.9	30	334	0.000260638	0.5203	570.8	TUBB4A	Tubulin beta-4A chain isoform Iso 1
nxp:NX_P04280-1	392	12	38520.6	22	196	0.000173238	0.3546	433.036	PRB1	Basic salivary proline-rich protein 1 isoform Iso 1
nxp:NX_P04279-2	402	0	45276.6	5	12	1.03426e-05	0.1667	19.9912	SEMG1	Semenogelin-1 isoform Iso 2
nxp:NX_P04279-1	462	0	52081.9	5	12	8.99939e-06	0.145	19.9912	SEMG1	Semenogelin-1 isoform Iso 1
nxp:NX_P04275-1	2813	5	309040	5	12	1.47804e-06	0.0334	20.2546	VWF	von Willebrand factor isoform Iso 1
nxp:NX_P04264-1	644	21	65981	69	1755	0.000944203	0.6568	3340.98	KRT1	Keratin, type II cytoskeletal 1 isoform Iso 1
nxp:NX_P04259-1	564	2	60012.3	45	539	0.000331119	0.6436	916.322	KRT6B	Keratin, type II cytoskeletal 6B isoform Iso 1
nxp:NX_P04233-1	296	1	33475.7	1	2	2.34106e-06	0.0642	5.6618	CD74	HLA class II histocompatibility antigen gamma chain isoform Iso 1
nxp:NX_P04217-1	495	51	54201.5	51	712	0.000498366	0.6646	1377.68	A1BG	Alpha-1B-glycoprotein isoform Iso 1
nxp:NX_P04211-1	117	0	12425	2	20	5.92268e-05	0.1368	28.7578	IGLV7-43	Immunoglobulin lambda variable 7-43 isoform Iso 1
nxp:NX_P04196-1	525	20	59522.9	20	117	7.72148e-05	0.3105	198.857	HRG	Histidine-rich glycoprotein isoform Iso 1
nxp:NX_P04179-3	162	2	18232.3	6	32	6.84398e-05	0.4877	57.1014	SOD2	Superoxide dismutase [Mn], mitochondrial isoform Iso 3
nxp:NX_P04179-2	183	0	20692.5	6	24	4.54396e-05	0.2951	40.8406	SOD2	Superoxide dismutase [Mn], mitochondrial isoform Iso 2
nxp:NX_P04179-1	222	0	24716.6	7	32	4.99426e-05	0.3063	55.7566	SOD2	Superoxide dismutase [Mn], mitochondrial isoform Iso 1
nxp:NX_P04155-1	84	6	9125.2	6	46	0.000189737	0.4643	81.7961	TFF1	Trefoil factor 1 isoform Iso 1
nxp:NX_P04114-1	4563	65	515265	65	216	1.64013e-05	0.1635	366.287	APOB	Apolipoprotein B-100 isoform Iso 1
nxp:NX_P04083-1	346	75	38672	75	1192	0.00119364	0.8035	2370.44	ANXA1	Annexin A1 isoform Iso 1
nxp:NX_P04080-1	98	9	11114.6	9	52	0.000183845	0.8367	88.1588	CSTB	Cystatin-B isoform Iso 1
nxp:NX_P04075-2	418	52	45214.1	61	766	0.000634931	0.8421	1458.29	ALDOA	Fructose-bisphosphate aldolase A isoform Iso 2
nxp:NX_P04040-1	527	58	59700.7	58	623	0.000409592	0.6926	1154.61	CAT	Catalase isoform Iso 1
nxp:NX_P04004-1	478	39	54253.2	39	503	0.000364598	0.4142	971.476	VTN	Vitronectin isoform Iso 1
nxp:NX_P04003-1	597	37	66971.4	37	268	0.000155537	0.531	434.211	C4BPA	C4b-binding protein alpha chain isoform Iso 1
nxp:NX_P03973-1	132	102	14297.9	102	6084	0.0159694	0.7879	10943.8	SLPI	Antileukoproteinase isoform Iso 1
nxp:NX_P03952-1	638	9	71304.8	10	44	2.38949e-05	0.1818	58.7037	KLKB1	Plasma kallikrein isoform Iso 1
nxp:NX_P03950-1	147	5	16521.4	5	22	5.18536e-05	0.4966	32.7238	ANG	Angiogenin isoform Iso 1
nxp:NX_P02812-1	416	1	40756.8	12	161	0.000134093	0.1947	350.01	PRB2	Basic salivary proline-rich protein 2 isoform Iso 1
nxp:NX_P02810-1	166	23	16988.3	24	224	0.000467535	0.9036	575.926	PRH1	Salivary acidic proline-rich phosphoprotein 1/2 isoform Iso 1
nxp:NX_P02795-1	61	0	6019.2	2	8	4.54396e-05	0.2131	14.6724	MT2A	Metallothionein-2 isoform Iso 1
nxp:NX_P02794-1	183	7	21194.3	7	55	0.000104132	0.5191	94.0833	FTH1	Ferritin heavy chain isoform Iso 1
nxp:NX_P02792-1	175	4	19989.1	4	24	4.75168e-05	0.3029	45.8722	FTL	Ferritin light chain isoform Iso 1
nxp:NX_P02790-1	462	73	51625.3	74	1608	0.00120592	0.7965	3065.47	HPX	Hemopexin isoform Iso 1
nxp:NX_P02788-1	710	424	78113.9	431	20466	0.00998731	0.9127	41957.5	LTF	Lactotransferrin isoform Iso 1
nxp:NX_P02787-1	698	220	76995.6	224	6066	0.00301107	0.894	11779.4	TF	Serotransferrin isoform Iso 1
nxp:NX_P02774-3	493	91	55023	91	1507	0.00105911	0.8398	2749.35	GC	Vitamin D-binding protein isoform Iso 3
nxp:NX_P02768-3	396	223	45112.4	406	32883	0.0287707	0.8889	72581	ALB	Albumin isoform Iso 3
nxp:NX_P02768-2	417	67	47311.7	378	33823	0.0281028	0.9137	76147.1	ALB	Albumin isoform Iso 2
nxp:NX_P02768-1	609	58	69303.5	557	49986	0.0284384	0.9376	108676	ALB	Albumin isoform Iso 1
nxp:NX_P02766-1	147	24	15859	24	234	0.000551534	0.8367	482.568	TTR	Transthyretin isoform Iso 1
nxp:NX_P02765-1	367	43	39297.7	43	266	0.000251125	0.6076	491.879	AHSG	Alpha-2-HS-glycoprotein isoform Iso 1
nxp:NX_P02763-1	201	71	23478.7	79	3512	0.00605386	0.592	6930.46	ORM1	Alpha-1-acid glycoprotein 1 isoform Iso 1
nxp:NX_P02760-1	352	30	38956	30	300	0.000295293	0.517	522.52	AMBP	Protein AMBP isoform Iso 1
nxp:NX_P02753-1	201	11	22977.2	11	80	0.000137901	0.5871	135.998	RBP4	Retinol-binding protein 4 isoform Iso 1
nxp:NX_P02751-9	2240	0	246515	59	389	6.01694e-05	0.3201	639.482	FN1	Fibronectin isoform Iso 9
nxp:NX_P02751-8	2296	0	252634	59	389	5.87018e-05	0.3123	639.482	FN1	Fibronectin isoform Iso 8
nxp:NX_P02751-7	2446	0	268725	58	383	5.42521e-05	0.2837	628.178	FN1	Fibronectin isoform Iso 7
nxp:NX_P02751-6	2184	0	240340	58	383	6.07603e-05	0.3214	629.645	FN1	Fibronectin isoform Iso 6
nxp:NX_P02751-5	2211	0	243164	58	382	5.98616e-05	0.318	629.2	FN1	Fibronectin isoform Iso 5
nxp:NX_P02751-4	2031	3	222819	52	348	5.93667e-05	0.3092	574.536	FN1	Fibronectin isoform Iso 4
nxp:NX_P02751-3	2355	0	259036	59	389	5.72312e-05	0.3045	639.482	FN1	Fibronectin isoform Iso 3
nxp:NX_P02751-2	642	10	71905.9	25	186	0.000100381	0.4626	315.045	FN1	Fibronectin isoform Iso 2
nxp:NX_P02751-17	2330	0	256323	59	389	5.78452e-05	0.3077	639.482	FN1	Fibronectin isoform Iso 17
nxp:NX_P02751-16	657	2	73616.6	22	192	0.000101253	0.3957	320.61	FN1	Fibronectin isoform Iso 16
nxp:NX_P02751-15	2477	0	272132	58	383	5.35731e-05	0.2802	628.178	FN1	Fibronectin isoform Iso 15
nxp:NX_P02751-14	2265	0	249228	59	389	5.95053e-05	0.3166	639.482	FN1	Fibronectin isoform Iso 14
nxp:NX_P02751-13	2267	0	249148	58	383	5.85358e-05	0.3061	628.178	FN1	Fibronectin isoform Iso 13
nxp:NX_P02751-12	2008	12	221134	61	375	6.47055e-05	0.3511	619.921	FN1	Fibronectin isoform Iso 12
nxp:NX_P02751-11	2386	0	262224	56	356	5.16956e-05	0.2795	592.832	FN1	Fibronectin isoform Iso 11
nxp:NX_P02751-10	2176	0	239458	59	389	6.19391e-05	0.3295	639.482	FN1	Fibronectin isoform Iso 10
nxp:NX_P02751-1	2386	0	262442	59	389	5.64876e-05	0.3005	639.482	FN1	Fibronectin isoform Iso 1
nxp:NX_P02750-1	347	34	38136.1	34	569	0.000568142	0.5908	1044.73	LRG1	Leucine-rich alpha-2-glycoprotein isoform Iso 1
nxp:NX_P02749-1	345	35	38254.6	35	722	0.00072509	0.7188	1321.88	APOH	Beta-2-glycoprotein 1 isoform Iso 1
nxp:NX_P02748-1	559	29	63114.7	29	185	0.000114666	0.4705	292.763	C9	Complement component C9 isoform Iso 1
nxp:NX_P02747-1	245	5	25739.1	5	30	4.24257e-05	0.2531	48.638	C1QC	Complement C1q subcomponent subunit C isoform Iso 1
nxp:NX_P02746-1	253	5	26686.5	5	16	2.19116e-05	0.1976	26.5362	C1QB	Complement C1q subcomponent subunit B isoform Iso 1
nxp:NX_P02743-1	223	13	25353.1	13	77	0.000119635	0.417	121.922	APCS	Serum amyloid P-component isoform Iso 1
nxp:NX_P02741-2	91	6	10390.4	12	126	0.000479737	0.6923	230.797	CRP	C-reactive protein isoform Iso 2
nxp:NX_P02741-1	224	10	25004.7	18	175	0.000270685	0.5089	332.782	CRP	C-reactive protein isoform Iso 1
nxp:NX_P02679-2	437	50	49447	128	2002	0.00158729	0.8673	3903.61	FGG	Fibrinogen gamma chain isoform Gamma-A
nxp:NX_P02679-1	453	0	51460.9	109	1825	0.00139585	0.8256	3626.63	FGG	Fibrinogen gamma chain isoform Gamma-B
nxp:NX_P02675-1	491	152	55874.3	152	3010	0.00212402	0.7923	6055.01	FGB	Fibrinogen beta chain isoform Iso 1
nxp:NX_P02671-2	644	65	69695.8	146	2247	0.0012089	0.6894	4235.39	FGA	Fibrinogen alpha chain isoform Iso 2
nxp:NX_P02671-1	866	0	94896.4	121	2060	0.000824182	0.4908	3922.39	FGA	Fibrinogen alpha chain isoform Iso 1
nxp:NX_P02656-1	99	4	10827.5	4	22	7.69948e-05	0.5152	43.2962	APOC3	Apolipoprotein C-III isoform Iso 1
nxp:NX_P02655-1	101	4	11258.7	4	18	6.17483e-05	0.4752	25.0259	APOC2	Apolipoprotein C-II isoform Iso 1
nxp:NX_P02652-1	100	25	11149.9	25	298	0.0010325	0.6	581.677	APOA2	Apolipoprotein A-II isoform Iso 1
nxp:NX_P02649-1	317	23	36113.7	23	114	0.0001246	0.7413	170.496	APOE	Apolipoprotein E isoform Iso 1
nxp:NX_P02647-1	267	79	30740.9	79	1056	0.00137033	0.8614	1924.98	APOA1	Apolipoprotein A-I isoform Iso 1
nxp:NX_P02585-1	160	0	18092.3	2	7	1.51584e-05	0.0438	8.5255	TNNC2	Troponin C, skeletal muscle isoform Iso 1
nxp:NX_P02545-6	614	0	69189.3	13	44	2.48289e-05	0.2329	69.262	LMNA	Prelamin-A/C isoform Iso 6
nxp:NX_P02545-5	565	3	62796.5	9	38	2.33029e-05	0.1805	59.988	LMNA	Prelamin-A/C isoform Iso 5
nxp:NX_P02545-4	574	0	63836	8	32	1.93158e-05	0.1585	54.347	LMNA	Prelamin-A/C isoform Iso 4
nxp:NX_P02545-3	634	0	70600.1	13	44	2.40457e-05	0.2256	69.262	LMNA	Prelamin-A/C isoform ADelta10
nxp:NX_P02545-2	572	2	65077.6	14	48	2.9075e-05	0.2727	74.2848	LMNA	Prelamin-A/C isoform C
nxp:NX_P02545-1	664	0	74076.7	13	44	2.29593e-05	0.2154	69.262	LMNA	Prelamin-A/C isoform A
nxp:NX_P02538-1	564	1	59990.3	45	627	0.000385179	0.617	1045.96	KRT6A	Keratin, type II cytoskeletal 6A isoform Iso 1
nxp:NX_P02533-1	472	2	51511.4	33	690	0.000506502	0.4703	1099.35	KRT14	Keratin, type I cytoskeletal 14 isoform Iso 1
nxp:NX_P02452-1	1464	2	138839	2	4	9.46657e-07	0.0171	6.5074	COL1A1	Collagen alpha-1(I) chain isoform Iso 1
nxp:NX_P02144-1	154	2	17154.9	2	4	8.99939e-06	0.1948	10.9906	MB	Myoglobin isoform Iso 1
nxp:NX_P02100-1	147	6	16174.5	10	837	0.0019728	0.2313	1365.75	HBE1	Hemoglobin subunit epsilon isoform Iso 1
nxp:NX_P02042-1	147	41	16027.3	69	2754	0.00649113	0.9728	5684.83	HBD	Hemoglobin subunit delta isoform Iso 1
nxp:NX_P02008-1	142	0	15609.2	6	482	0.00117607	0.1056	737.629	HBZ	Hemoglobin subunit zeta isoform Iso 1
nxp:NX_P01903-1	254	2	28570.7	2	4	5.45632e-06	0.1181	6.5684	HLA-DRA	HLA class II histocompatibility antigen, DR alpha chain isoform Iso 1
nxp:NX_P01893-1	362	0	40848.2	8	22	2.10566e-05	0.2431	40.5764	HLA-H	Putative HLA class I histocompatibility antigen, alpha chain H isoform Iso 1
nxp:NX_P01889-1	362	6	40416.9	10	38	3.63705e-05	0.2983	65.6832	HLA-B	HLA class I histocompatibility antigen, B alpha chain isoform Iso 1
nxp:NX_P01880-2	430	0	47452	5	14	1.12806e-05	0.0884	20.586	IGHD	Immunoglobulin heavy constant delta isoform Iso 2
nxp:NX_P01880-1	384	0	42308.3	5	14	1.2632e-05	0.099	20.586	IGHD	Immunoglobulin heavy constant delta isoform Iso 1
nxp:NX_P01877-1	340	79	36550	105	3954	0.00402932	0.8735	7666.87	IGHA2	Immunoglobulin heavy constant alpha 2 isoform Iso 1
nxp:NX_P01876-1	353	85	37612.6	142	9541	0.00936468	0.8725	19719	IGHA1	Immunoglobulin heavy constant alpha 1 isoform Iso 1
nxp:NX_P01871-2	474	0	51872.9	81	1564	0.00114323	0.6076	2797.89	IGHM	Immunoglobulin heavy constant mu isoform Iso 2
nxp:NX_P01871-1	453	27	49390.6	92	1637	0.00125206	0.6932	2904	IGHM	Immunoglobulin heavy constant mu isoform Iso 1
nxp:NX_P01861-1	327	24	35899.9	76	2696	0.00285658	0.8135	5242.05	IGHG4	Immunoglobulin heavy constant gamma 4 isoform Iso 1
nxp:NX_P01860-1	377	24	41242.4	101	4988	0.00458415	0.687	9051.95	IGHG3	Immunoglobulin heavy constant gamma 3 isoform Iso 1
nxp:NX_P01859-1	326	77	35859.7	114	3813	0.0040525	0.8313	7271.55	IGHG2	Immunoglobulin heavy constant gamma 2 isoform Iso 1
nxp:NX_P01857-1	330	71	36065.2	154	7377	0.00774533	0.8727	15000.5	IGHG1	Immunoglobulin heavy constant gamma 1 isoform Iso 1
nxp:NX_P01834-1	107	68	11739.8	68	5373	0.0173983	1	11935.7	IGKC	Immunoglobulin kappa constant isoform Iso 1
nxp:NX_P01833-1	764	11	83213.6	204	8517	0.00386249	0.7382	17436.8	PIGR	Polymeric immunoglobulin receptor isoform Iso 1
nxp:NX_P01825-1	116	3	12909.6	10	135	0.000403227	0.431	233.516	IGHV4-59	Immunoglobulin heavy variable 4-59 isoform Iso 1
nxp:NX_P01824-1	125	1	13890.1	11	133	0.000368651	0.48	229.588	IGHV4-39	Immunoglobulin heavy variable 4-39 isoform Iso 1
nxp:NX_P01817-1	119	6	13204.8	6	12	3.49388e-05	0.5882	18.709	IGHV2-5	Immunoglobulin heavy variable 2-5 isoform Iso 1
nxp:NX_P01814-1	119	0	13233.7	1	4	1.16463e-05	0.1849	8.3418	IGHV2-70	Immunoglobulin heavy variable 2-70 isoform Iso 1
nxp:NX_P01782-1	118	2	12918.4	16	219	0.000643037	0.5763	437.494	IGHV3-9	Immunoglobulin heavy variable 3-9 isoform Iso 1
nxp:NX_P01780-1	117	4	12916.4	18	445	0.0013178	0.6325	963.626	IGHV3-7	Immunoglobulin heavy variable 3-7 isoform Iso 1
nxp:NX_P01772-1	117	0	13047.5	14	311	0.000920976	0.641	646.455	IGHV3-33	Immunoglobulin heavy variable 3-33 isoform Iso 1
nxp:NX_P01768-1	117	0	12920.4	17	195	0.000577461	0.7009	345.289	IGHV3-30	Immunoglobulin heavy variable 3-30 isoform Iso 1
nxp:NX_P01767-1	116	2	12743.3	11	266	0.000794507	0.5172	559.91	IGHV3-53	Immunoglobulin heavy variable 3-53 isoform Iso 1
nxp:NX_P01766-1	116	6	12480.2	11	248	0.000740743	0.5776	559.924	IGHV3-13	Immunoglobulin heavy variable 3-13 isoform Iso 1
nxp:NX_P01764-1	117	2	12556.2	18	287	0.000849904	0.5726	602.11	IGHV3-23	Immunoglobulin heavy variable 3-23 isoform Iso 1
nxp:NX_P01763-1	117	3	12786.2	18	419	0.0012408	0.5812	931.348	IGHV3-48	Immunoglobulin heavy variable 3-48 isoform Iso 1
nxp:NX_P01762-1	117	4	12882.3	14	286	0.000846943	0.5043	592.536	IGHV3-11	Immunoglobulin heavy variable 3-11 isoform Iso 1
nxp:NX_P01743-1	117	3	12906.2	5	131	0.000387935	0.4872	256.344	IGHV1-46	Immunoglobulin heavy variable 1-46 isoform Iso 1
nxp:NX_P01742-1	117	2	12633.3	8	145	0.000429394	0.6325	277.642	IGHV1-69	Immunoglobulin heavy variable 1-69 isoform Iso 1
nxp:NX_P01721-1	117	5	12539.8	5	26	7.69948e-05	0.2564	57.5796	IGLV6-57	Immunoglobulin lambda variable 6-57 isoform Iso 1
nxp:NX_P01718-1	113	3	12139.1	8	33	0.000101183	0.3805	69.1002	IGLV3-27	Immunoglobulin lambda variable 3-27 isoform Iso 1
nxp:NX_P01717-1	112	5	11985.8	14	167	0.000516621	0.3929	320.055	IGLV3-25	Immunoglobulin lambda variable 3-25 isoform Iso 1
nxp:NX_P01715-1	115	1	12269.8	2	6	1.8077e-05	0.3391	12.4428	IGLV3-1	Immunoglobulin lambda variable 3-1 isoform Iso 1
nxp:NX_P01714-1	112	7	12016.8	8	122	0.000377412	0.4107	230.761	IGLV3-19	Immunoglobulin lambda variable 3-19 isoform Iso 1
nxp:NX_P01709-1	118	4	12355.9	8	58	0.000170302	0.2966	125.214	IGLV2-8	Immunoglobulin lambda variable 2-8 isoform Iso 1
nxp:NX_P01706-1	119	1	12618	5	59	0.000171783	0.3277	127.21	IGLV2-11	Immunoglobulin lambda variable 2-11 isoform Iso 1
nxp:NX_P01705-1	113	4	11867.7	6	26	7.97203e-05	0.2566	41.8014	IGLV2-23	Immunoglobulin lambda variable 2-23 isoform Iso 1
nxp:NX_P01704-1	120	1	12571	4	16	4.61969e-05	0.2833	26.72	IGLV2-14	Immunoglobulin lambda variable 2-14 isoform Iso 1
nxp:NX_P01703-1	118	4	12275.9	10	59	0.000173238	0.5254	143.592	IGLV1-40	Immunoglobulin lambda variable 1-40 isoform Iso 1
nxp:NX_P01701-1	117	9	12222.9	11	65	0.000192487	0.5385	120.471	IGLV1-51	Immunoglobulin lambda variable 1-51 isoform Iso 1
nxp:NX_P01700-1	117	6	12257.9	12	115	0.000340554	0.5128	259.193	IGLV1-47	Immunoglobulin lambda variable 1-47 isoform Iso 1
nxp:NX_P01699-1	117	4	12175.8	13	73	0.000216178	0.4701	173.341	IGLV1-44	Immunoglobulin lambda variable 1-44 isoform Iso 1
nxp:NX_P01624-1	115	1	12470.2	10	138	0.000415772	0.4174	251.728	IGKV3-15	Immunoglobulin kappa variable 3-15 isoform Iso 1
nxp:NX_P01619-1	116	7	12531.3	20	389	0.00116189	0.6207	818.434	IGKV3-20	Immunoglobulin kappa variable 3-20 isoform Iso 1
nxp:NX_P01615-1	120	5	12930.4	10	177	0.000511053	0.575	351.128	IGKV2D-28	Immunoglobulin kappa variable 2D-28 isoform Iso 1
nxp:NX_P01614-1	121	2	13283.6	8	140	0.000400882	0.5041	265.254	IGKV2D-40	Immunoglobulin kappa variable 2D-40 isoform Iso 1
nxp:NX_P01611-1	117	0	12594.2	9	83	0.000245791	0.4786	166.207	IGKV1D-12	Immunoglobulin kappa variable 1D-12 isoform Iso 1
nxp:NX_P01602-1	117	5	12755.3	8	119	0.000352399	0.4786	255.654	IGKV1-5	Immunoglobulin kappa variable 1-5 isoform Iso 1
nxp:NX_P01601-1	117	1	12704.2	12	150	0.000444201	0.4615	363.375	IGKV1D-16	Immunoglobulin kappa variable 1D-16 isoform Iso 1
nxp:NX_P01599-1	117	1	12752.3	14	160	0.000473814	0.4701	381.543	IGKV1-17	Immunoglobulin kappa variable 1-17 isoform Iso 1
nxp:NX_P01597-1	117	3	12711.3	16	188	0.000556732	0.641	438.041	IGKV1-39	Immunoglobulin kappa variable 1-39 isoform Iso 1
nxp:NX_P01594-1	117	5	12822.3	11	194	0.0005745	0.3932	456.581	IGKV1-33	Immunoglobulin kappa variable 1-33 isoform Iso 1
nxp:NX_P01591-1	159	37	18069	37	1243	0.00270862	0.7987	2442.5	JCHAIN	Immunoglobulin J chain isoform Iso 1
nxp:NX_P01116-2	188	0	21392.9	4	22	4.05451e-05	0.1649	28.8644	KRAS	GTPase KRas isoform 2B
nxp:NX_P01116-1	189	0	21624	4	22	4.03306e-05	0.164	28.8644	KRAS	GTPase KRas isoform 2A
nxp:NX_P01112-2	170	0	18840.2	3	18	3.66858e-05	0.1294	22.1418	HRAS	GTPase HRas isoform Iso 2
nxp:NX_P01112-1	189	0	21266.5	3	16	2.93314e-05	0.1164	19.1482	HRAS	GTPase HRas isoform Iso 1
nxp:NX_P01111-1	189	0	21197.5	3	16	2.93314e-05	0.1164	19.1482	NRAS	GTPase NRas isoform Iso 1
nxp:NX_P01042-3	391	26	43775.6	54	643	0.000569781	0.6726	1216.03	KNG1	Kininogen-1 isoform Iso 3
nxp:NX_P01042-2	427	1	47834.6	48	630	0.000511195	0.6581	1207.92	KNG1	Kininogen-1 isoform LMW
nxp:NX_P01042-1	644	3	71894.1	44	562	0.00030236	0.4425	1053.87	KNG1	Kininogen-1 isoform HMW
nxp:NX_P01040-1	98	2	10981.7	2	4	1.41419e-05	0.2245	7.5984	CSTA	Cystatin-A isoform Iso 1
nxp:NX_P01037-1	141	2	16359.3	5	24	5.89747e-05	0.3759	41.1364	CST1	Cystatin-SN isoform Iso 1
nxp:NX_P01036-1	141	3	16186	7	36	8.84621e-05	0.5532	62.9544	CST4	Cystatin-S isoform Iso 1
nxp:NX_P01034-1	146	26	15771.1	26	334	0.000792625	0.6712	632.537	CST3	Cystatin-C isoform Iso 1
nxp:NX_P01033-1	207	22	23137.5	22	316	0.000528921	0.7295	605.602	TIMP1	Metalloproteinase inhibitor 1 isoform Iso 1
nxp:NX_P01031-1	1676	24	188168	24	82	1.69517e-05	0.1736	130.888	C5	Complement C5 isoform Iso 1
nxp:NX_P01024-1	1663	374	187012	374	4556	0.000949217	0.9176	8663.51	C3	Complement C3 isoform Iso 1
nxp:NX_P01023-1	1474	155	163170	172	1782	0.000418875	0.7456	3243.73	A2M	Alpha-2-macroglobulin isoform Iso 1
nxp:NX_P01019-1	485	35	53102.5	35	201	0.000143591	0.5443	392.686	AGT	Angiotensinogen isoform Iso 1
nxp:NX_P01011-3	95	8	10692.5	14	438	0.00159744	0.4632	1087.4	SERPINA3	Alpha-1-antichymotrypsin isoform Iso 3
nxp:NX_P01011-2	216	14	24000.3	61	1273	0.00204197	0.6528	2790.65	SERPINA3	Alpha-1-antichymotrypsin isoform Iso 2
nxp:NX_P01011-1	423	63	47602.5	117	2901	0.00237619	0.7612	6261.22	SERPINA3	Alpha-1-antichymotrypsin isoform Iso 1
nxp:NX_P01009-2	359	67	40219.6	135	3758	0.00362691	0.7688	7665.29	SERPINA1	Alpha-1-antitrypsin isoform Iso 2
nxp:NX_P01009-1	418	36	46689	150	4993	0.00413866	0.811	9611.57	SERPINA1	Alpha-1-antitrypsin isoform Iso 1
nxp:NX_P01008-1	464	41	52550.9	41	466	0.00034797	0.6013	893.367	SERPINC1	Antithrombin-III isoform Iso 1
nxp:NX_P00918-1	260	6	29209.9	6	12	1.59912e-05	0.3154	20.9166	CA2	Carbonic anhydrase 2 isoform Iso 1
nxp:NX_P00915-1	261	17	28834.4	17	104	0.00013806	0.8314	191.449	CA1	Carbonic anhydrase 1 isoform Iso 1
nxp:NX_P00751-2	621	21	68810.5	74	975	0.000543985	0.5588	1942.52	CFB	Complement factor B isoform Iso 2
nxp:NX_P00751-1	764	43	85460.5	108	1499	0.000679802	0.699	2799.59	CFB	Complement factor B isoform Iso 1
nxp:NX_P00748-1	615	6	67729.9	6	12	6.76052e-06	0.1382	15.626	F12	Coagulation factor XII isoform Iso 1
nxp:NX_P00747-1	810	65	90492.1	66	565	0.000241678	0.6593	956.117	PLG	Plasminogen isoform Iso 1
nxp:NX_P00739-2	385	0	43031.4	63	2789	0.00250993	0.5195	5332.77	HPR	Haptoglobin-related protein isoform Iso 2
nxp:NX_P00739-1	348	12	38986.7	68	2816	0.00280367	0.6178	5374.31	HPR	Haptoglobin-related protein isoform Iso 1
nxp:NX_P00738-2	347	96	38409.3	176	8922	0.00890854	0.8991	17873.2	HP	Haptoglobin isoform Iso 2
nxp:NX_P00738-1	406	6	45158.6	162	9287	0.00792544	0.8842	18783.6	HP	Haptoglobin isoform Iso 1
nxp:NX_P00736-1	705	16	80048.8	16	39	1.91668e-05	0.3163	63.6103	C1R	Complement C1r subcomponent isoform Iso 1
nxp:NX_P00734-1	622	29	69974.1	29	173	9.63673e-05	0.4839	299.271	F2	Prothrombin isoform Iso 1
nxp:NX_P00568-1	194	2	21603.3	2	4	7.14385e-06	0.134	7.0924	AK1	Adenylate kinase isoenzyme 1 isoform Iso 1
nxp:NX_P00558-1	417	57	44568.1	63	504	0.000418763	0.8273	911.849	PGK1	Phosphoglycerate kinase 1 isoform Iso 1
nxp:NX_P00505-2	387	0	42984	2	4	3.58115e-06	0.1008	9.1524	GOT2	Aspartate aminotransferase, mitochondrial isoform Iso 2
nxp:NX_P00505-1	430	0	47469.3	2	4	3.22304e-06	0.0907	9.1524	GOT2	Aspartate aminotransferase, mitochondrial isoform Iso 1
nxp:NX_P00492-1	218	4	24545.6	4	10	1.58934e-05	0.2064	15.0712	HPRT1	Hypoxanthine-guanine phosphoribosyltransferase isoform Iso 1
nxp:NX_P00491-1	289	18	32079.1	18	68	8.15239e-05	0.6436	116.916	PNP	Purine nucleoside phosphorylase isoform Iso 1
nxp:NX_P00450-1	1065	161	122110	162	2251	0.000732318	0.8235	4482.03	CP	Ceruloplasmin isoform Iso 1
nxp:NX_P00441-1	154	21	15907.9	21	282	0.000634457	0.7597	638.993	SOD1	Superoxide dismutase [Cu-Zn] isoform Iso 1
nxp:NX_P00390-5	440	0	47219.2	6	24	1.88987e-05	0.1977	39.5502	GSR	Glutathione reductase, mitochondrial isoform Iso 4
nxp:NX_P00390-4	469	1	50446.8	7	28	2.06852e-05	0.2345	46.0662	GSR	Glutathione reductase, mitochondrial isoform Iso 3
nxp:NX_P00390-3	493	0	52975.4	7	26	1.82726e-05	0.2211	45.241	GSR	Glutathione reductase, mitochondrial isoform Iso 2
nxp:NX_P00390-1	522	0	56202.9	8	28	1.8585e-05	0.2529	49.7024	GSR	Glutathione reductase, mitochondrial isoform Mitochondrial
nxp:NX_P00367-3	425	0	46527.4	3	6	4.89143e-06	0.1106	11.999	GLUD1	Glutamate dehydrogenase 1, mitochondrial isoform Iso 3
nxp:NX_P00367-1	558	0	61341.2	4	8	4.96741e-06	0.1147	14.8158	GLUD1	Glutamate dehydrogenase 1, mitochondrial isoform Iso 1
nxp:NX_P00352-1	501	37	54808.9	37	176	0.000121716	0.6307	349.294	ALDH1A1	Retinal dehydrogenase 1 isoform Iso 1
nxp:NX_P00338-5	241	7	26677	25	247	0.000355103	0.7925	401.946	LDHA	L-lactate dehydrogenase A chain isoform Iso 5
nxp:NX_P00338-4	274	9	30167.8	35	401	0.00050707	0.8832	709.139	LDHA	L-lactate dehydrogenase A chain isoform Iso 4
nxp:NX_P00338-3	361	0	39793.9	36	455	0.000436695	0.7618	782.575	LDHA	L-lactate dehydrogenase A chain isoform Iso 3
nxp:NX_P00338-2	274	0	30019.5	21	233	0.000294632	0.6496	378.404	LDHA	L-lactate dehydrogenase A chain isoform Iso 2
nxp:NX_O95994-1	175	10	19948.6	11	42	8.31544e-05	0.6171	76.6138	AGR2	Anterior gradient protein 2 homolog isoform Iso 1
nxp:NX_O95837-1	355	0	41526.2	2	4	3.90396e-06	0.0535	5.2316	GNA14	Guanine nucleotide-binding protein subunit alpha-14 isoform Iso 1
nxp:NX_O95834-3	850	0	91994	2	4	1.63048e-06	0.0447	8.4532	EML2	Echinoderm microtubule-associated protein-like 2 isoform Iso 3
nxp:NX_O95834-2	796	0	86398.3	2	4	1.74109e-06	0.0477	8.4532	EML2	Echinoderm microtubule-associated protein-like 2 isoform Iso 2
nxp:NX_O95834-1	649	2	70616.1	4	8	4.2709e-06	0.0986	13.711	EML2	Echinoderm microtubule-associated protein-like 2 isoform Iso 1
nxp:NX_O95831-3	609	0	66235.5	1	4	2.27571e-06	0.0181	5.0808	AIFM1	Apoptosis-inducing factor 1, mitochondrial isoform Iso 3
nxp:NX_O95831-2	326	0	35597.5	1	4	4.25125e-06	0.0337	5.0808	AIFM1	Apoptosis-inducing factor 1, mitochondrial isoform Iso 2
nxp:NX_O95831-1	613	0	66840.9	1	4	2.26086e-06	0.0179	5.0808	AIFM1	Apoptosis-inducing factor 1, mitochondrial isoform Iso 1
nxp:NX_O95782-2	955	0	105277	2	4	1.45121e-06	0.0346	6.2004	AP2A1	AP-2 complex subunit alpha-1 isoform B
nxp:NX_O95782-1	977	0	107460	2	4	1.41853e-06	0.0338	6.2004	AP2A1	AP-2 complex subunit alpha-1 isoform A
nxp:NX_O95777-1	96	2	10378.3	2	4	1.44365e-05	0.2708	6.1842	LSM8	U6 snRNA-associated Sm-like protein LSm8 isoform Iso 1
nxp:NX_O95758-7	457	0	49490.7	1	6	4.54893e-06	0.0219	9.8016	PTBP3	Polypyrimidine tract-binding protein 3 isoform Iso 7
nxp:NX_O95758-5	555	0	59953.2	1	6	3.74569e-06	0.018	9.8016	PTBP3	Polypyrimidine tract-binding protein 3 isoform Iso 5
nxp:NX_O95758-4	558	0	60361.4	1	6	3.72556e-06	0.0179	9.8016	PTBP3	Polypyrimidine tract-binding protein 3 isoform Iso 4
nxp:NX_O95758-3	552	0	59634	1	6	3.76605e-06	0.0181	9.8016	PTBP3	Polypyrimidine tract-binding protein 3 isoform Iso 3
nxp:NX_O95758-2	547	0	59056.6	1	6	3.80047e-06	0.0183	9.8016	PTBP3	Polypyrimidine tract-binding protein 3 isoform Iso 2
nxp:NX_O95757-1	839	2	94434.5	3	6	2.47778e-06	0.0489	8.8466	HSPA4L	Heat shock 70 kDa protein 4L isoform Iso 1
nxp:NX_O95747-1	527	2	57968	2	4	2.6298e-06	0.0455	5.6426	OXSR1	Serine/threonine-protein kinase OSR1 isoform Iso 1
nxp:NX_O95716-1	219	1	24233.8	2	12	1.8985e-05	0.0685	17.2402	RAB3D	Ras-related protein Rab-3D isoform Iso 1
nxp:NX_O95678-1	551	0	59506	16	204	0.000128278	0.2015	353.767	KRT75	Keratin, type II cytoskeletal 75 isoform Iso 1
nxp:NX_O95544-2	591	0	63397.8	2	4	2.34502e-06	0.0525	6.962	NADK	NAD kinase isoform Iso 2
nxp:NX_O95544-1	446	0	49178.5	2	4	3.10741e-06	0.0695	6.962	NADK	NAD kinase isoform Iso 1
nxp:NX_O95498-5	119	0	13220.6	2	14	4.0762e-05	0.3193	26.1188	VNN2	Vascular non-inflammatory molecule 2 isoform Iso 5
nxp:NX_O95498-4	195	0	21875	5	20	3.55361e-05	0.3385	37.4358	VNN2	Vascular non-inflammatory molecule 2 isoform Iso 4
nxp:NX_O95498-3	192	0	21446.8	5	20	3.60913e-05	0.3438	37.4358	VNN2	Vascular non-inflammatory molecule 2 isoform Iso 3
nxp:NX_O95498-2	299	0	33199.9	5	20	2.31757e-05	0.2207	37.4358	VNN2	Vascular non-inflammatory molecule 2 isoform Iso 2
nxp:NX_O95498-1	520	2	58447.5	7	26	1.73238e-05	0.2365	50.7824	VNN2	Vascular non-inflammatory molecule 2 isoform Iso 1
nxp:NX_O95497-1	513	8	56957.1	9	22	1.48586e-05	0.2222	45.6905	VNN1	Pantetheinase isoform Iso 1
nxp:NX_O95445-1	188	3	21221.4	3	8	1.47437e-05	0.1596	11.0774	APOM	Apolipoprotein M isoform Iso 1
nxp:NX_O95436-2	689	1	75589.6	7	16	8.0459e-06	0.1306	22.255	SLC34A2	Sodium-dependent phosphate transport protein 2B isoform Iso 2
nxp:NX_O95436-1	690	1	75691.6	7	16	8.03424e-06	0.1377	23.0584	SLC34A2	Sodium-dependent phosphate transport protein 2B isoform Iso 1
[truncated: 250 more rows]

## Sheet: Peptides
Sequence	SpectrumCount	TheoreticalMH	ProteinCount	ProteinID
YGTCIYQGR	2378	1117.51	2	| nxp:NX_P59666-1 | nxp:NX_P59665-1
DETYVPKEFNAETFTFHADICTLSEKER	1927	3377.56	3	| nxp:NX_P02768-3 | nxp:NX_P02768-2 | nxp:NX_P02768-1
STDYGIFQINSR	1821	1400.68	1	| nxp:NX_P61626-1
FGQGSGPIVLDDVR	1776	1459.75	9	| nxp:NX_Q9UGM3-9 | nxp:NX_Q9UGM3-4 | nxp:NX_Q9UGM3-8 | nxp:NX_Q9UGM3-2 | nxp:NX_Q9UGM3-5 | nxp:NX_Q9UGM3-3 | nxp:NX_Q9UGM3-1 | nxp:NX_Q9UGM3-7 | nxp:NX_Q9UGM3-6
CLDPVDTPNPTR	1576	1384.65	1	| nxp:NX_P03973-1
NIETIINTFHQYSVK	1472	1806.94	1	| nxp:NX_P06702-1
EFNAETFTFHADICTLSEKER	1463	2545.17	3	| nxp:NX_P02768-3 | nxp:NX_P02768-2 | nxp:NX_P02768-1
AVMDDFAAFVEK	1415	1342.63	3	| nxp:NX_P02768-3 | nxp:NX_P02768-2 | nxp:NX_P02768-1
YICENQDSISSK	1395	1443.64	2	| nxp:NX_P02768-2 | nxp:NX_P02768-1
LVNEVTEFAK	1346	1149.62	2	| nxp:NX_P02768-3 | nxp:NX_P02768-1
YWCNDGKTPGAVNACHLSCSALLQDNIADAVACAK	1343	3850.74	1	| nxp:NX_P61626-1
LGMDGYR	1311	811.377	1	| nxp:NX_P61626-1
CCAAADPHECYAK	1265	1552.6	3	| nxp:NX_P02768-3 | nxp:NX_P02768-2 | nxp:NX_P02768-1
YLYEIAR	1229	927.493	2	| contaminant_INT-STD1 | nxp:NX_P02768-1
VFDEFKPLVEEPQNLIK	1195	2045.1	3	| nxp:NX_P02768-3 | nxp:NX_P02768-2 | nxp:NX_P02768-1
ADDKETCFAEEGKK	1186	1627.73	3	| nxp:NX_P02768-3 | nxp:NX_P02768-2 | nxp:NX_P02768-1
LVRPEVDVMCTAFHDNEETFLKK	1153	2778.36	2	| nxp:NX_P02768-3 | nxp:NX_P02768-1
CCTESLVNR	1143	1138.5	4	| nxp:NX_P02768-3 | nxp:NX_P02768-2 | contaminant_INT-STD1 | nxp:NX_P02768-1
TVAAPSVFIFPPSDEQLK	1121	1946.03	1	| nxp:NX_P01834-1
VNVDEVGGEALGR	1115	1314.66	1	| nxp:NX_P68871-1
LLETECPQYIR	1105	1421.71	1	| nxp:NX_P05109-1
ATNYNAGDRSTDYGIFQINSR	1101	2363.1	1	| nxp:NX_P61626-1
TFTCTAAYPESK	1094	1375.62	1	| nxp:NX_P01876-1
IPACIAGER	1085	986.509	2	| nxp:NX_P59666-1 | nxp:NX_P59665-1
VHTECCHGDLLECADDRADLAK	1084	2585.12	2	| nxp:NX_P02768-2 | nxp:NX_P02768-1
IPACIAGERR	1083	1142.61	2	| nxp:NX_P59666-1 | nxp:NX_P59665-1
VGAHAGEYGAEALER	1054	1529.73	1	| nxp:NX_P69905-1
FKDLGEENFK	1029	1226.61	3	| nxp:NX_P02768-3 | nxp:NX_P02768-2 | nxp:NX_P02768-1
AEFAEVSK	1027	880.441	2	| nxp:NX_P02768-2 | nxp:NX_P02768-1
NFPPSQDASGDLYTTSSQLTLPATQCLAGK	1006	3168.52	1	| nxp:NX_P01876-1
DAVTYTEHAK	992	1134.54	1	| nxp:NX_P62805-1
AVM(+15.994900)DDFAAFVEK	991	1358.63	3	| nxp:NX_P02768-3 | nxp:NX_P02768-2 | nxp:NX_P02768-1
RHPYFYAPELLFFAK	988	1899	1	| nxp:NX_P02768-1
KVPQVSTPTLVEVSR	986	1639.94	4	| nxp:NX_P02768-3 | nxp:NX_P02768-2 | contaminant_INT-STD1 | nxp:NX_P02768-1
WESGYNTR	970	1012.45	1	| nxp:NX_P61626-1
AAFTECCQAADK	936	1371.57	1	| nxp:NX_P02768-1
QVHPDTGISSK	934	1168.6	15	| nxp:NX_Q99879-1 | nxp:NX_Q99880-1 | nxp:NX_Q16778-1 | nxp:NX_P33778-1 | nxp:NX_P23527-1 | nxp:NX_O60814-1 | nxp:NX_P58876-1 | nxp:NX_P57053-1 | nxp:NX_Q93079-1 | nxp:NX_P06899-1 | nxp:NX_Q8N257-1 | nxp:NX_P62807-1 | nxp:NX_Q99877-1 | nxp:NX_Q96A08-1 | nxp:NX_Q5QNW6-2
HPPPPPFQNQQRPPR	913	1792.94	1	| nxp:NX_Q16378-1
QGHFYGETAAVYVAVEER	909	2025.97	2	| contaminant_PIGR_HUMAN | nxp:NX_P01833-1
LGHPDTLNQGEFK	896	1455.72	1	| nxp:NX_P06702-1
TCVADESAENCDK	835	1498.58	2	| nxp:NX_P02768-3 | nxp:NX_P02768-1
QNCELFEQLGEYK	832	1657.75	3	| nxp:NX_P02768-3 | nxp:NX_P02768-2 | nxp:NX_P02768-1
AACLLPK	831	772.439	1	| nxp:NX_P02768-1
VVWCAVGEQELR	822	1445.72	1	| nxp:NX_P02788-1
AGFAGDDAPR	816	976.448	11	| nxp:NX_P63267-2 | nxp:NX_P60709-1 | nxp:NX_P63261-1 | nxp:NX_P63267-1 | nxp:NX_P62736-1 | nxp:NX_P68133-1 | nxp:NX_P68032-1 | nxp:NX_P0CG39-1 | nxp:NX_P0CG38-1 | nxp:NX_Q6S8J3-1 | nxp:NX_A5A3E0-1
TPLTATLSK	806	931.546	1	| nxp:NX_P01876-1
VYACEVTHQGLSSPVTK	790	1875.93	1	| nxp:NX_P01834-1
LADFALLCLDGK	777	1335.7	1	| nxp:NX_P02788-1
YWCNDGKTPGAVNACHLSCSALLQDNIADAVACAKR	769	4006.84	1	| nxp:NX_P61626-1
LVDTLPQKPR	760	1166.69	1	| nxp:NX_P11684-1
TPGAVNACHLSCSALLQDNIADAVACAK	751	2927.38	1	| nxp:NX_P61626-1
QEPSQGTTTFAVTSILR	749	1835.95	1	| nxp:NX_P01876-1
AAGGAVCEQPLGLECR	747	1687.79	1	| nxp:NX_Q9HC84-1
CCPDTCGIK	746	1110.44	1	| nxp:NX_P03973-1
RVVRDPQGIR	715	1195.7	1	| nxp:NX_P61626-1
LLVVYPWTQR	709	1274.73	5	| nxp:NX_P02100-1 | nxp:NX_P69892-1 | nxp:NX_P69891-1 | nxp:NX_P02042-1 | nxp:NX_P68871-1
QTALVELVK	700	1000.6	3	| nxp:NX_P02768-3 | nxp:NX_P02768-2 | nxp:NX_P02768-1
WLQGSQELPR	698	1213.63	2	| nxp:NX_P01877-1 | nxp:NX_P01876-1
GISLANWMCLAK	695	1363.69	1	| nxp:NX_P61626-1
ALPAPIEK	678	838.503	3	| nxp:NX_P01857-1 | nxp:NX_P01860-1 | contaminant_NRL_1MCOH
QEPERNECFLQHKDDNPNLPR	670	2636.23	2	| nxp:NX_P02768-3 | nxp:NX_P02768-1
SCAVAEYGVYVK	656	1345.65	4	| nxp:NX_P00738-2 | nxp:NX_P00739-1 | nxp:NX_P00739-2 | nxp:NX_P00738-1
SHCIAEVENDEM(+15.994900)PADLPSLAADFVESK	653	2990.34	2	| nxp:NX_P02768-2 | nxp:NX_P02768-1
RMPCAEDYLSVVLNQLCVLHEK	649	2674.32	3	| nxp:NX_P02768-3 | nxp:NX_P02768-2 | nxp:NX_P02768-1
DVFLGM(+15.994900)FLYEYAR	647	1639.78	2	| nxp:NX_P02768-2 | nxp:NX_P02768-1
QLGCGWATSAPGNAR	646	1545.72	9	| nxp:NX_Q9UGM3-9 | nxp:NX_Q9UGM3-4 | nxp:NX_Q9UGM3-8 | nxp:NX_Q9UGM3-2 | nxp:NX_Q9UGM3-5 | nxp:NX_Q9UGM3-3 | nxp:NX_Q9UGM3-1 | nxp:NX_Q9UGM3-7 | nxp:NX_Q9UGM3-6
SLANWMCLAK	626	1193.58	1	| nxp:NX_P61626-1
YWCNDGK	623	942.377	1	| nxp:NX_P61626-1
TPEVTCVVVDVSHEDPEVK	604	2139.03	1	| nxp:NX_P01857-1
NLLFNDNTECLAR	599	1579.75	1	| nxp:NX_P02788-1
HYEGSTVPEKK	598	1274.64	2	| nxp:NX_P00738-2 | nxp:NX_P00738-1
SYSCQVTHEGSTVEK	591	1711.76	5	| nxp:NX_P0DOY2-1 | nxp:NX_P0DOY3-1 | nxp:NX_P0CF74-1 | nxp:NX_B9A064-1 | contaminant_NRL_1MCOL
EQLKAVMDDFAAFVEK	591	1840.91	3	| nxp:NX_P02768-3 | nxp:NX_P02768-2 | nxp:NX_P02768-1
YVGGQEHFAHLLILR	588	1752.95	1	| nxp:NX_P02763-1
RHPDYSVVLLLR	585	1467.84	2	| nxp:NX_P02768-2 | nxp:NX_P02768-1
EFTPPVQAAYQK	584	1378.7	1	| nxp:NX_P68871-1
ADEGWYWCGVK	582	1370.58	2	| contaminant_PIGR_HUMAN | nxp:NX_P01833-1
ESSSEDVSQEESLFLISGKPEGR	580	2510.19	1	| nxp:NX_P10163-1
SGTASVVCLLNNFYPR	579	1797.9	1	| nxp:NX_P01834-1
LVTDLTK	576	789.472	3	| nxp:NX_P02768-2 | contaminant_INT-STD1 | nxp:NX_P02768-1
KLVDTLPQKPR	568	1294.78	1	| nxp:NX_P11684-1
QNCELFEQLGEYKFQNALLVR	565	2599.3	3	| nxp:NX_P02768-3 | nxp:NX_P02768-2 | nxp:NX_P02768-1
TYETTLEK	564	984.488	2	| nxp:NX_P02768-2 | nxp:NX_P02768-1
AAPSVTLFPPSSEELQANK	563	1986.02	4	| nxp:NX_A0M8Q6-1 | nxp:NX_P0DOY2-1 | nxp:NX_P0DOY3-1 | nxp:NX_P0CF74-1
ETYGEMADCCAK	559	1434.53	2	| nxp:NX_P02768-3 | nxp:NX_P02768-1
DASGVTFTWTPSSGK	559	1540.73	1	| nxp:NX_P01876-1
VDNALQSGNSQESVTEQDSK	556	2135.97	1	| nxp:NX_P01834-1
GPSVFPLAPSSK	554	1186.65	2	| nxp:NX_P01857-1 | contaminant_NRL_1MCOH
SGNTFRPEVHLLPPPSEELALNELVTLTCLAR	541	3573.87	2	| nxp:NX_P01877-1 | nxp:NX_P01876-1
DGAGDVAFIR	540	1020.51	1	| nxp:NX_P02788-1
STSGGTAALGCLVK	534	1321.68	3	| nxp:NX_P01857-1 | nxp:NX_P01860-1 | contaminant_NRL_1MCOH
SCDTPPPCPR	533	1186.5	1	| nxp:NX_P01860-1
SSEDVSQEESLFLISGKPEGR	523	2294.11	1	| nxp:NX_P10163-1
LKECCEKPLLEK	516	1546.8	2	| nxp:NX_P02768-2 | nxp:NX_P02768-1
ATNYNAGDR	512	981.438	1	| nxp:NX_P61626-1
YYGYTGAFR	511	1097.51	2	| nxp:NX_P02787-1 | nxp:NX_P02788-1
VGYVSGWGR	510	980.495	2	| nxp:NX_P00738-2 | nxp:NX_P00738-1
SHCIAEVENDEMPADLPSLAADFVESK	503	2974.34	2	| nxp:NX_P02768-2 | nxp:NX_P02768-1
ALNSIIDVYHK	502	1272.69	1	| nxp:NX_P05109-1
NQVSLTCLVK	499	1161.63	5	| nxp:NX_P01859-1 | nxp:NX_P01861-1 | nxp:NX_P01857-1 | nxp:NX_P01860-1 | contaminant_NRL_1MCOH
SAVQGPPER	490	940.485	2	| nxp:NX_P01877-1 | nxp:NX_P01876-1
TLSPTAVLILGPK	481	1309.81	1	| nxp:NX_Q8TDL5-1
AGVETTTPSK	480	990.51	2	| nxp:NX_P0DOY2-1 | nxp:NX_P0DOY3-1
SCHLAM(+15.994900)APNHAVVSR	480	1665.79	1	| nxp:NX_P02788-1
VTSIQDWVQK	477	1203.64	2	| nxp:NX_P00738-2 | nxp:NX_P00738-1
SNVCTLVR	477	948.493	1	| nxp:NX_P08246-1
LDELRDEGK	472	1074.54	1	| nxp:NX_P02768-1
EICPSFQR	471	1036.49	1	| nxp:NX_P11684-1
ISGLIYEETR	470	1180.62	1	| nxp:NX_P62805-1
DDNPNLPR	467	940.448	2	| nxp:NX_P02768-3 | nxp:NX_P02768-1
VMPICLPSKDYAEVGR	465	1834.92	2	| nxp:NX_P00738-2 | nxp:NX_P00738-1
NIETIINTFHQYSV	465	1678.84	1	| nxp:NX_P06702-1
SSGVPPEVFTR	462	1175.61	1	| nxp:NX_P08311-1
LGM(+15.994900)DGYR	458	827.372	1	| nxp:NX_P61626-1
SNLCALCIGDEQGENK	448	1807.79	1	| nxp:NX_P02788-1
HVEDVPAFQALGSLNDLQFFR	447	2403.21	1	| nxp:NX_P25311-1
KQTALVELVK	445	1128.7	3	| nxp:NX_P02768-3 | nxp:NX_P02768-2 | nxp:NX_P02768-1
NYAEAKDVFLGM(+15.994900)FLYEYAR	442	2316.1	2	| nxp:NX_P02768-2 | nxp:NX_P02768-1
NADLQVLKPEPELVYEDLRGSVTFHCALGPEVANVAK	441	4079.09	2	| contaminant_PIGR_HUMAN | nxp:NX_P01833-1
STELLIR	438	831.493	6	| nxp:NX_Q6NXT2-1 | nxp:NX_Q71DI3-1 | nxp:NX_Q16695-1 | nxp:NX_P68431-1 | nxp:NX_P84243-1 | nxp:NX_Q5TEC6-1
NGSDCPDKFCLFQSETK	427	2032.87	1	| nxp:NX_P02788-1
CGLVPVLAENYK	427	1362.71	1	| nxp:NX_P02788-1
VADALTNAVAHVDDMPNALSALSDLHAHK	426	2996.49	1	| nxp:NX_P69905-1
YLCGAHSDGQLQEGSPIQAWQLFVNEESTIPR	425	3630.73	2	| contaminant_PIGR_HUMAN | nxp:NX_P01833-1
AGLQFPVGR	423	944.531	16	| nxp:NX_Q71UI9-2 | nxp:NX_Q99878-1 | nxp:NX_P0C0S5-1 | nxp:NX_Q71UI9-1 | nxp:NX_Q16777-1 | nxp:NX_Q9BTM1-1 | nxp:NX_P0C0S8-1 | nxp:NX_P04908-1 | nxp:NX_Q93077-1 | nxp:NX_P20671-1 | nxp:NX_Q7L7L0-1 | nxp:NX_Q8IUE6-1 | nxp:NX_Q6FI13-1 | nxp:NX_Q96QV6-1 | nxp:NX_P16104-1 | nxp:NX_Q9BTM1-2
FDEYFSQSCAPGSDPR	405	1862.77	1	| nxp:NX_P02788-1
SHCIAEVENDEMPADLPSLAADFVESKDVCK	404	3476.57	2	| nxp:NX_P02768-2 | nxp:NX_P02768-1
NADLQVLKPEPELVYEDLR	403	2241.18	2	| contaminant_PIGR_HUMAN | nxp:NX_P01833-1
THTCPPCPAPELLGGPSVFLFPPKPK	403	2844.46	1	| nxp:NX_P01857-1
KGDTFSCMVGHEALPLAFTQK	403	2337.14	1	| nxp:NX_P01876-1
ALVLIAFAQYLQQCPFEDHVK	397	2490.28	2	| nxp:NX_P02768-3 | nxp:NX_P02768-1
DNIQGITKPAIR	396	1325.75	1	| nxp:NX_P62805-1
CLAENAGDVAFVK	383	1393.68	1	| nxp:NX_P02788-1
KPECQSDWQCPGK	381	1619.69	1	| nxp:NX_P03973-1
ETYGEM(+15.994900)ADCCAK	380	1450.53	2	| nxp:NX_P02768-3 | nxp:NX_P02768-1
AQAQPGVPLRELGQVVECSLDFGLVCR	380	2998.52	1	| nxp:NX_Q9HC84-1
AVLTIDEK	379	888.504	2	| nxp:NX_P01009-1 | nxp:NX_P20848-1
DLCGCYSVSSVLPGCAEPWNHGK	376	2593.13	1	| nxp:NX_P01876-1
SYELPDGQVITIGNER	375	1790.89	11	| nxp:NX_P63267-2 | nxp:NX_Q9BYX7-1 | nxp:NX_P60709-1 | nxp:NX_P63261-1 | nxp:NX_Q562R1-1 | nxp:NX_P63267-1 | nxp:NX_P62736-1 | nxp:NX_P68133-1 | nxp:NX_P68032-1 | nxp:NX_Q6S8J3-1 | nxp:NX_A5A3E0-1
SCDKTHTCPPCPAPELLGGPSVFLFPPKPK	373	3334.64	1	| nxp:NX_P01857-1
HAVSEGTK	370	828.421	16	| nxp:NX_A0A2R8Y619-1 | nxp:NX_Q99879-1 | nxp:NX_Q99880-1 | nxp:NX_Q16778-1 | nxp:NX_P33778-1 | nxp:NX_P23527-1 | nxp:NX_O60814-1 | nxp:NX_P58876-1 | nxp:NX_P57053-1 | nxp:NX_Q93079-1 | nxp:NX_P06899-1 | nxp:NX_Q8N257-1 | nxp:NX_P62807-1 | nxp:NX_Q99877-1 | nxp:NX_Q96A08-1 | nxp:NX_Q5QNW6-2
ECCEKPLLEK	370	1305.62	2	| nxp:NX_P02768-2 | nxp:NX_P02768-1
LGHPDTLNQGEFKELVR	368	1953.02	1	| nxp:NX_P06702-1
FFESFGDLSTPDAVMGNPK	367	2058.95	1	| nxp:NX_P68871-1
YVMLPVADQDQCIR	366	1707.82	2	| nxp:NX_P00738-2 | nxp:NX_P00738-1
LCTVATLR	366	933.519	2	| nxp:NX_P02768-3 | nxp:NX_P02768-1
YVM(+15.994900)LPVADQDQCIR	364	1723.81	2	| nxp:NX_P00738-2 | nxp:NX_P00738-1
TTPPVLDSDGSFFLYSK	364	1873.92	2	| nxp:NX_P01857-1 | contaminant_NRL_1MCOH
EFNAETFTFHADICTLSEK	362	2260.02	3	| nxp:NX_P02768-3 | nxp:NX_P02768-2 | nxp:NX_P02768-1
VVAGVANALAHK	359	1149.67	2	| nxp:NX_P02042-1 | nxp:NX_P68871-1
YQEDTCYGDAGSAFAVHDLEEDTWYATGILSFDK	358	3874.67	2	| nxp:NX_P00738-2 | nxp:NX_P00738-1
SLHTLFGDKLCTVATLR	358	1932.04	2	| nxp:NX_P02768-3 | nxp:NX_P02768-1
QVFAVQR	358	847.479	1	| nxp:NX_P08246-1
YAASSYLSLTPEQWK	357	1743.86	6	| nxp:NX_A0M8Q6-1 | nxp:NX_P0DOY2-1 | nxp:NX_P0DOY3-1 | nxp:NX_P0CF74-1 | nxp:NX_B9A064-1 | contaminant_NRL_1MCOL
VIEHIMEDLDTNADKQLSFEEFIMLMAR	356	3338.61	1	| nxp:NX_P06702-1
GSWGTVCDDSWDTNDANVVCR	355	2413.98	9	| nxp:NX_Q9UGM3-9 | nxp:NX_Q9UGM3-4 | nxp:NX_Q9UGM3-8 | nxp:NX_Q9UGM3-2 | nxp:NX_Q9UGM3-5 | nxp:NX_Q9UGM3-3 | nxp:NX_Q9UGM3-1 | nxp:NX_Q9UGM3-7 | nxp:NX_Q9UGM3-6
CSTSPLLEACEFLRK	353	1810.88	1	| nxp:NX_P02788-1
QSSGENCDVVVNTLGK	352	1706.8	2	| contaminant_PIGR_HUMAN | nxp:NX_P01833-1
SHCIAEVENDEM(+15.994900)PADLPSLAADFVESKDVCK	347	3492.56	2	| nxp:NX_P02768-2 | nxp:NX_P02768-1
ILTQDTPEFFIDQGHAK	346	1959.98	1	| nxp:NX_Q8TDL5-1
AFVNCDENSR	345	1211.51	2	| contaminant_PIGR_HUMAN | nxp:NX_P01833-1
FFSASCVPGADKGQFPNLCR	344	2258.05	1	| nxp:NX_P02788-1
SAVTALWGK	343	932.52	1	| nxp:NX_P68871-1
EPQVYTLPPSRDELTK	341	1872.97	1	| nxp:NX_P01857-1
NVNPVALPR	341	979.568	1	| nxp:NX_P08311-1
YKKPECQSDWQCPGK	340	1910.85	1	| nxp:NX_P03973-1
LVRPEVDVMCTAF	339	1536.75	2	| nxp:NX_P02768-3 | nxp:NX_P02768-1
DSYVGDEAQSK	336	1198.52	6	| nxp:NX_P60709-1 | nxp:NX_P63261-1 | nxp:NX_P63267-1 | nxp:NX_P62736-1 | nxp:NX_P68133-1 | nxp:NX_P68032-1
SDTSLTWNSVK	336	1237.61	1	| nxp:NX_P02788-1
SPVGVQPILNEHTFCAGMSK	335	2172.06	2	| nxp:NX_P00738-2 | nxp:NX_P00738-1
IAGEASR	334	703.373	14	| nxp:NX_Q99879-1 | nxp:NX_Q16778-1 | nxp:NX_P33778-1 | nxp:NX_P23527-1 | nxp:NX_O60814-1 | nxp:NX_P58876-1 | nxp:NX_P57053-1 | nxp:NX_Q93079-1 | nxp:NX_P06899-1 | nxp:NX_P62807-1 | nxp:NX_Q99877-1 | nxp:NX_Q5QNW6-2 | nxp:NX_Q6DRA6-1 | nxp:NX_Q6DN03-1
DAGFYWCLTNGDTLWR	331	1974.88	2	| contaminant_PIGR_HUMAN | nxp:NX_P01833-1
GEADAMSLDGGYVYTAGK	328	1804.81	1	| nxp:NX_P02788-1
AVGDKLPECEAVCGKPK	326	1857.92	4	| nxp:NX_P00738-2 | nxp:NX_P00739-1 | nxp:NX_P00739-2 | nxp:NX_P00738-1
SVNGKEDAIWNLLR	325	1614.86	1	| nxp:NX_P02788-1
LSITGTYDLK	321	1110.6	2	| nxp:NX_P01009-2 | nxp:NX_P01009-1
KVADALTNAVAHVDDMPNALSALSDLHAHK	321	3124.58	1	| nxp:NX_P69905-1
GYSFTTTAER	320	1132.53	2	| nxp:NX_P60709-1 | nxp:NX_P63261-1
VDSGNDVTDIADDGCPKPPEIAHGYVEHSVR	318	3349.54	2	| nxp:NX_P00738-2 | nxp:NX_P00738-1
ENTQQHITAR	317	1197.6	1	| nxp:NX_P08311-1
FFSASCVPGADK	316	1285.59	1	| nxp:NX_P02788-1
VIEHIMEDLDTNADKQLSFEEF	314	2623.22	1	| nxp:NX_P06702-1
EIQTAVR	311	816.457	14	| nxp:NX_Q99879-1 | nxp:NX_Q99880-1 | nxp:NX_Q16778-1 | nxp:NX_P33778-1 | nxp:NX_P23527-1 | nxp:NX_O60814-1 | nxp:NX_P58876-1 | nxp:NX_P57053-1 | nxp:NX_Q93079-1 | nxp:NX_P06899-1 | nxp:NX_P62807-1 | nxp:NX_Q99877-1 | nxp:NX_Q96A08-1 | nxp:NX_Q5QNW6-2
QINDYVEK	310	1008.5	2	| nxp:NX_P01009-2 | nxp:NX_P01009-1
VDPVNFK	310	818.441	2	| nxp:NX_P69905-1 | nxp:NX_P02008-1
DSTYSLSSTLTLSK	306	1502.76	1	| nxp:NX_P01834-1
QEYDESGPSIVHR	305	1516.7	7	| nxp:NX_Q9BYX7-1 | nxp:NX_P60709-1 | nxp:NX_P63261-1 | nxp:NX_P0CG39-1 | nxp:NX_P0CG38-1 | nxp:NX_Q6S8J3-1 | nxp:NX_A5A3E0-1
KGGSFQLNELQGLK	305	1518.83	1	| nxp:NX_P02788-1
SVIPSDGPSVACVK	302	1415.72	1	| nxp:NX_P02787-1
TFVPGCQPGEFTLGNIK	300	1864.93	2	| nxp:NX_P80188-2 | nxp:NX_P80188-1
SSEDPNEDIVER	300	1389.61	1	| nxp:NX_P01591-1
GSFPWQAK	299	920.462	4	| nxp:NX_P00738-2 | nxp:NX_P00739-1 | nxp:NX_P00739-2 | nxp:NX_P00738-1
LSDAGQYLCQAGDDSNSNKK	299	2170.97	2	| contaminant_PIGR_HUMAN | nxp:NX_P01833-1
CLLNNFYPR	298	1196.59	1	| nxp:NX_P01834-1
SVRPNDEVTAVLAVQTELKECMVVK	297	2815.47	1	| nxp:NX_P12273-1
WFYIASAFR	296	1160.59	2	| nxp:NX_P02763-1 | nxp:NX_P19652-1
DSYVGDEAQSKR	293	1354.62	6	| nxp:NX_P60709-1 | nxp:NX_P63261-1 | nxp:NX_P63267-1 | nxp:NX_P62736-1 | nxp:NX_P68133-1 | nxp:NX_P68032-1
LDELRDEGKASSAK	290	1518.78	1	| nxp:NX_P02768-1
VLSPADKTNVK	290	1171.67	1	| nxp:NX_P69905-1
TCVADESAENCDKSLHTLFGDKLCTVATLR	289	3411.6	2	| nxp:NX_P02768-3 | nxp:NX_P02768-1
YLTWASR	287	896.462	2	| nxp:NX_P01877-1 | nxp:NX_P01876-1
SDVVYTDWKK	281	1240.62	1	| nxp:NX_P02763-1
VVWCAVGEQELRK	280	1573.82	1	| nxp:NX_P02788-1
GSWGTVCDDYWDTNDANVVCR	279	2490.01	9	| nxp:NX_Q9UGM3-9 | nxp:NX_Q9UGM3-4 | nxp:NX_Q9UGM3-8 | nxp:NX_Q9UGM3-2 | nxp:NX_Q9UGM3-5 | nxp:NX_Q9UGM3-3 | nxp:NX_Q9UGM3-1 | nxp:NX_Q9UGM3-7 | nxp:NX_Q9UGM3-6
VPQVSTPTLVEVSR	276	1511.84	4	| nxp:NX_P02768-3 | nxp:NX_P02768-2 | contaminant_INT-STD1 | nxp:NX_P02768-1
KDLQNFLKK	276	1133.67	1	| nxp:NX_P06702-1
VFSNGADLSGVTEEAPLK	275	1833.92	2	| nxp:NX_P01009-2 | nxp:NX_P01009-1
HLSCSALLQDNIADAVACAK	275	2157.04	1	| nxp:NX_P61626-1
GGSFQLNELQGLK	273	1390.73	1	| nxp:NX_P02788-1
ELGQVVECSLDFGLVCR	271	1980.95	1	| nxp:NX_Q9HC84-1
GADVWFK	267	822.414	1	| nxp:NX_P05109-1
QLGCGWAMSAPGNAR	266	1575.72	8	| nxp:NX_Q9UGM3-4 | nxp:NX_Q9UGM3-8 | nxp:NX_Q9UGM3-2 | nxp:NX_Q9UGM3-5 | nxp:NX_Q9UGM3-3 | nxp:NX_Q9UGM3-1 | nxp:NX_Q9UGM3-7 | nxp:NX_Q9UGM3-6
MFLSFPTTK	266	1071.55	1	| nxp:NX_P69905-1
VDNALQSGNSQESVTEQDSKDSTYSLSSTLTLSK	264	3619.71	1	| nxp:NX_P01834-1
SALLQDNIADAVACAK	262	1659.84	1	| nxp:NX_P61626-1
KLGHPDTLNQGEFK	260	1583.82	1	| nxp:NX_P06702-1
VIETLLM(+15.994900)DTPSSYEAAMELFSPDQDMR	260	3105.41	1	| nxp:NX_P11684-1
TDIADDGCPKPPEIAHGYVEHSVR	259	2663.25	2	| nxp:NX_P00738-2 | nxp:NX_P00738-1
TYFPHFDLSHGSAQVK	259	1833.89	1	| nxp:NX_P69905-1
GQFPNLCR	257	991.478	1	| nxp:NX_P02788-1
HPPPPPFQNQQRPP	256	1636.83	1	| nxp:NX_Q16378-1
TYIPPKGETK	254	1133.62	2	| nxp:NX_B2RPK0-1 | nxp:NX_P09429-1
ALGFEAAESSLTK	254	1323.68	1	| nxp:NX_Q8TDL5-1
AVLDVFEEGTEASAATAVK	253	1907.96	1	| nxp:NX_P01011-1
RYGTCIYQGR	251	1273.61	2	| nxp:NX_P59666-1 | nxp:NX_P59665-1
LLLPGELAK	250	953.603	16	| nxp:NX_A0A2R8Y619-1 | nxp:NX_Q99879-1 | nxp:NX_Q99880-1 | nxp:NX_Q16778-1 | nxp:NX_P33778-1 | nxp:NX_P23527-1 | nxp:NX_O60814-1 | nxp:NX_P58876-1 | nxp:NX_P57053-1 | nxp:NX_Q93079-1 | nxp:NX_P06899-1 | nxp:NX_Q8N257-1 | nxp:NX_P62807-1 | nxp:NX_Q99877-1 | nxp:NX_Q96A08-1 | nxp:NX_Q5QNW6-2
RHPYFYAPELLFFAKR	250	2055.1	1	| nxp:NX_P02768-1
CAFSSQEPYFSYSGAFK	249	1975.85	1	| nxp:NX_P02788-1
LGHPDTLNQGEFKELVRK	248	2081.11	1	| nxp:NX_P06702-1
SCYFIPNEGVPGDSTR	247	1798.81	2	| nxp:NX_P08118-2 | nxp:NX_P08118-1
KLGHPDTLNQGEFKELVR	246	2081.11	1	| nxp:NX_P06702-1
VTIM(+15.994900)PK	241	704.401	6	| nxp:NX_Q6NXT2-1 | nxp:NX_Q71DI3-1 | nxp:NX_Q16695-1 | nxp:NX_P68431-1 | nxp:NX_P84243-1 | nxp:NX_Q5TEC6-1
GGCITLISSEGYVSSK	240	1657.81	2	| contaminant_PIGR_HUMAN | nxp:NX_P01833-1
EPQVYTLPPSREEMTK	239	1904.94	3	| nxp:NX_P01859-1 | nxp:NX_P01860-1 | contaminant_NRL_1MCOH
VVAGVANALAHKYH	239	1449.8	2	| nxp:NX_P02042-1 | nxp:NX_P68871-1
EPQVYTLPPSR	238	1286.67	4	| nxp:NX_P01859-1 | nxp:NX_P01857-1 | nxp:NX_P01860-1 | contaminant_NRL_1MCOH
FNWYVDGVEVHNAK	238	1677.8	3	| nxp:NX_P01859-1 | nxp:NX_P01861-1 | nxp:NX_P01857-1
RHPYFYAPELL	238	1405.73	2	| contaminant_INT-STD1 | nxp:NX_P02768-1
VAPEEHPVLLTEAPLNPK	238	1954.06	2	| nxp:NX_P60709-1 | nxp:NX_P63261-1
M(+15.994900)FLSFPTTK	237	1087.55	1	| nxp:NX_P69905-1
AVFPSIVGRPR	236	1198.71	11	| nxp:NX_P63267-2 | nxp:NX_Q9BYX7-1 | nxp:NX_P60709-1 | nxp:NX_P63261-1 | nxp:NX_P63267-1 | nxp:NX_P62736-1 | nxp:NX_P68133-1 | nxp:NX_P68032-1 | nxp:NX_P0CG38-1 | nxp:NX_Q6S8J3-1 | nxp:NX_A5A3E0-1
DTEEEDFHVDQVTTVK	236	1891.86	2	| nxp:NX_P01009-2 | nxp:NX_P01009-1
NLAVSQVVHK	236	1094.63	1	| nxp:NX_P01011-1
SDVVYTDWK	236	1112.53	1	| nxp:NX_P02763-1
GYQVCPVLADIECR	236	1679.79	1	| nxp:NX_Q9HC84-1
DQCQVDSQCPGQMK	235	1680.68	3	| nxp:NX_Q14508-2 | nxp:NX_Q14508-3 | nxp:NX_Q14508-1
FGSYCPTTCGIADFLSTYQTK	234	2417.08	2	| nxp:NX_P02679-2 | nxp:NX_P02679-1
DLYANTVLSGGTTMYPGIADR	234	2215.07	2	| nxp:NX_P60709-1 | nxp:NX_P63261-1
YWCLWEGAQNGR	233	1539.68	2	| contaminant_PIGR_HUMAN | nxp:NX_P01833-1
CCMGMCGK	232	1003.33	1	| nxp:NX_P03973-1
CEPLEKQHEKER	231	1582.76	2	| nxp:NX_P02763-1 | nxp:NX_P19652-1
GPSVFPLAPCSR	230	1287.65	3	| nxp:NX_P01859-1 | nxp:NX_P01861-1 | nxp:NX_P01860-1
AQAQPGVPLR	229	1036.59	1	| nxp:NX_Q9HC84-1
RMPCAEDYLSV	228	1340.6	3	| nxp:NX_P02768-3 | nxp:NX_P02768-2 | nxp:NX_P02768-1
AAFTECCQAADKAACLLPK	228	2124.99	1	| nxp:NX_P02768-1
THYYAVAVVK	226	1150.63	1	| nxp:NX_P02788-1
QVLLHQQAK	226	1064.62	1	| nxp:NX_P02788-1
SAVQGPPERDLCGCYSVSSVLPGCAEPWNHGK	225	3514.59	1	| nxp:NX_P01876-1
TVTAM(+15.994900)DVVYALK	225	1326.7	1	| nxp:NX_P62805-1
DTLMISR	224	835.434	5	| nxp:NX_P01859-1 | nxp:NX_P01861-1 | nxp:NX_P01857-1 | nxp:NX_P01860-1 | contaminant_NRL_1MCOH
VIETLLMDTPSSYEAAMELFSPDQDMR	224	3089.42	1	| nxp:NX_P11684-1
IQDKEGIPPDQQR	223	1523.78	4	| nxp:NX_P62987-1 | nxp:NX_P62979-1 | nxp:NX_P0CG47-1 | nxp:NX_P0CG48-1
RSDTSLTWNSVK	219	1393.71	1	| nxp:NX_P02788-1
DLGEENFK	217	951.442	3	| nxp:NX_P02768-3 | nxp:NX_P02768-2 | nxp:NX_P02768-1
YLGPQYVAGITNLK	217	1536.84	1	| nxp:NX_P02788-1
YLGPQYVAGITNLKK	217	1664.94	1	| nxp:NX_P02788-1
SVLGQLGITK	214	1015.61	2	| nxp:NX_P01009-2 | nxp:NX_P01009-1
VVNPTQK	212	785.452	2	| nxp:NX_P01009-1 | nxp:NX_P20848-1
SQQSSDPDPNCVDRPVEGYLAVAVVR	212	2858.37	1	| nxp:NX_P02788-1
LYGSEAFATDFQDSAAAK	211	1891.87	2	| nxp:NX_P01011-2 | nxp:NX_P01011-1
VHCDVHFGLVCR	211	1498.7	1	| nxp:NX_Q9HC84-1
NQINALTSFVDASMVYGSEEPLAR	207	2612.27	2	| nxp:NX_P05164-1 | nxp:NX_P05164-3
YQPM(+15.994900)EPNPR	207	1147.52	2	| nxp:NX_P05164-1 | nxp:NX_P05164-3
GISLANWM(+15.994900)CLAK	206	1379.68	1	| nxp:NX_P61626-1
LKQVLLHQQAK	205	1305.8	1	| nxp:NX_P02788-1
RPCFSALEVDETYVPK	204	1910.93	3	| nxp:NX_P02768-3 | nxp:NX_P02768-2 | nxp:NX_P02768-1
TVTINCPFK	203	1079.56	2	| contaminant_PIGR_HUMAN | nxp:NX_P01833-1
HYEGSTVPEK	203	1146.54	2	| nxp:NX_P00738-2 | nxp:NX_P00738-1
VAAEDWK	203	818.404	2	| nxp:NX_P01877-1 | nxp:NX_P01876-1
QALAQISLPR	203	1096.65	2	| nxp:NX_P05164-1 | nxp:NX_P05164-3
EIGELYLPK	203	1061.59	1	| nxp:NX_P01011-1
VLCCSDDHCR	203	1321.51	1	| nxp:NX_Q9HC84-1
RM(+15.994900)PCAEDYLSVVLNQLCVLHEK	202	2690.31	3	| nxp:NX_P02768-3 | nxp:NX_P02768-2 | nxp:NX_P02768-1
GQPREPQVYTLPPSRDELTK	202	2311.2	1	| nxp:NX_P01857-1
EQLGEFYEALDCLR	202	1742.81	1	| nxp:NX_P02763-1
EITALAPSTMK	200	1161.62	7	| nxp:NX_P63267-2 | nxp:NX_P60709-1 | nxp:NX_P63261-1 | nxp:NX_P63267-1 | nxp:NX_P62736-1 | nxp:NX_P68133-1 | nxp:NX_P68032-1
TVAAPSVFIFPPSDEQLKSGTASVVCLLNNFYPR	200	3724.9	1	| nxp:NX_P01834-1
DIAPTLTLYVGK	199	1290.73	4	| nxp:NX_P00738-2 | nxp:NX_P00739-1 | nxp:NX_P00739-2 | nxp:NX_P00738-1
DNCCILDER	198	1194.49	2	| nxp:NX_P02679-2 | nxp:NX_P02679-1
DLQNFLK	197	877.478	1	| nxp:NX_P06702-1
GTFATLSELHCDKLHVDPENFR	197	2586.24	1	| nxp:NX_P68871-1
CGLGINSR	196	876.436	2	| contaminant_PIGR_HUMAN | nxp:NX_P01833-1
LVLSDCATSHGSLR	195	1515.76	1	| nxp:NX_Q8TDL5-1
AEDTAVYYCAR	194	1318.57	10	| nxp:NX_A0A0C4DH42-1 | nxp:NX_P01767-1 | nxp:NX_P0DP02-1 | nxp:NX_A0A0J9YVY3-1 | nxp:NX_P01762-1 | nxp:NX_P01780-1 | nxp:NX_A0A0B4J1V1-1 | nxp:NX_P01772-1 | nxp:NX_A0A0B4J1X5-1 | nxp:NX_P01763-1
DKCEPLEKQHEK	194	1540.74	2	| nxp:NX_P02763-1 | nxp:NX_P19652-1
GRLEVPCQSLEAYAELCR	194	2151.03	1	| nxp:NX_Q9HC84-1
SGVPVSLVK	192	885.54	1	| nxp:NX_Q8TDL5-1
ASGPPVSELITK	191	1198.67	3	| nxp:NX_P16403-1 | nxp:NX_P10412-1 | nxp:NX_P16402-1
IVTENIPCGTTGTTCSK	191	1838.86	1	| nxp:NX_Q9HC84-1
M(+15.994900)CLNYEVR	190	1100.49	1	| nxp:NX_P98088-1
PACIAGER	188	873.425	2	| nxp:NX_P59666-1 | nxp:NX_P59665-1
NFPPSQDASGDLYTTSSQLTLPATQCPDGK	188	3196.47	1	| nxp:NX_P01877-1
MCFNYEIR	188	1132.49	1	| nxp:NX_Q9HC84-1
EQLKAVM(+15.994900)DDFAAFVEK	187	1856.91	3	| nxp:NX_P02768-3 | nxp:NX_P02768-2 | nxp:NX_P02768-1
KDLQNFLK	187	1005.57	1	| nxp:NX_P06702-1
SPVGVQPILNEHTFCAGM(+15.994900)SK	186	2188.05	2	| nxp:NX_P00738-2 | nxp:NX_P00738-1
GPPVSCIK	186	857.455	1	| nxp:NX_P02788-1
MGVAAHK	186	713.376	1	| nxp:NX_P05109-1
MDTSASGPTR	186	1022.46	1	| nxp:NX_Q8TDL5-1
TLLGPAFAECHALVDSTAYLAACAQDLCR	186	3194.51	1	| nxp:NX_Q9HC84-1
QSNNKYAASSYLSLTPEQWK	185	2315.13	6	| nxp:NX_A0M8Q6-1 | nxp:NX_P0DOY2-1 | nxp:NX_P0DOY3-1 | nxp:NX_P0CF74-1 | nxp:NX_B9A064-1 | contaminant_NRL_1MCOL
IICDNTGITTVSK	185	1421.73	2	| nxp:NX_P05164-1 | nxp:NX_P05164-3
DVTVLQNTDGNNNEAWAK	184	1988.93	1	| nxp:NX_P02788-1
LLGNVLVCVLAHHFGK	184	1776.99	1	| nxp:NX_P68871-1
TLNQPDSQLQLTTGNGLFLSEGLK	183	2574.34	2	| nxp:NX_P01009-2 | nxp:NX_P01009-1
NQDQQGPFK	183	1061.5	1	| nxp:NX_P98088-1
RNDEELNKLLGK	181	1428.78	7	| nxp:NX_Q99878-1 | nxp:NX_Q16777-1 | nxp:NX_Q9BTM1-1 | nxp:NX_P0C0S8-1 | nxp:NX_P20671-1 | nxp:NX_Q6FI13-1 | nxp:NX_Q9BTM1-2
SCVSPVKA	181	847.434	1	| nxp:NX_P03973-1
KVPQVSTPTLVEV	180	1396.8	4	| nxp:NX_P02768-3 | nxp:NX_P02768-2 | contaminant_INT-STD1 | nxp:NX_P02768-1
VFSNGADLSGVTEEAPLKLSK	180	2162.13	2	| nxp:NX_P01009-2 | nxp:NX_P01009-1
SCHLAMAPNHAVVSR	180	1649.8	1	| nxp:NX_P02788-1
ILLNPQDKDGSFSVVITGLR	179	2172.2	2	| contaminant_PIGR_HUMAN | nxp:NX_P01833-1
FQLFGSPSGQK	179	1195.61	1	| nxp:NX_P02788-1
M(+15.994900)CFNYEIR	178	1148.49	1	| nxp:NX_Q9HC84-1
LVRPEVDVMCTAFHDNEETFLK	177	2650.26	2	| nxp:NX_P02768-3 | nxp:NX_P02768-1
TEGDGVYTLNNEK	176	1439.66	2	| nxp:NX_P00738-2 | nxp:NX_P00738-1
VDTLPQKPR	176	1053.61	1	| nxp:NX_P11684-1
GFYPSDIAVEWESNGQPENNYK	175	2544.13	3	| nxp:NX_P01861-1 | nxp:NX_P01857-1 | contaminant_NRL_1MCOH
AAGGHLCQQPK	175	1166.57	1	| nxp:NX_Q9HC84-1
EQLSLLDR	174	973.531	2	| nxp:NX_P01011-2 | nxp:NX_P01011-1
AEFAEVSKLVTDLTK	173	1650.89	2	| nxp:NX_P02768-2 | nxp:NX_P02768-1
LVSLTLNLVTR	172	1228.76	2	| contaminant_PIGR_HUMAN | nxp:NX_P01833-1
VFSSNGQSITFDAIQEACAR	172	2201.03	2	| nxp:NX_Q8IWL1-1 | nxp:NX_Q8IWL2-2
ESTVFEDLSDEAERDEYELLCPDNTR	172	3132.36	1	| nxp:NX_P02788-1
VIEHIMEDLDTNADK	172	1742.83	1	| nxp:NX_P06702-1
RAPAFEGR	171	903.48	2	| contaminant_PIGR_HUMAN | nxp:NX_P01833-1
IECVSAETTEDCIAK	171	1725.77	1	| nxp:NX_P02787-1
SVVGDALEFGNSWK	171	1508.74	1	| nxp:NX_Q9HC84-1
RLLLPGELAK	170	1109.7	16	| nxp:NX_A0A2R8Y619-1 | nxp:NX_Q99879-1 | nxp:NX_Q99880-1 | nxp:NX_Q16778-1 | nxp:NX_P33778-1 | nxp:NX_P23527-1 | nxp:NX_O60814-1 | nxp:NX_P58876-1 | nxp:NX_P57053-1 | nxp:NX_Q93079-1 | nxp:NX_P06899-1 | nxp:NX_Q8N257-1 | nxp:NX_P62807-1 | nxp:NX_Q99877-1 | nxp:NX_Q96A08-1 | nxp:NX_Q5QNW6-2
HQGVMVGMGQK	170	1171.57	7	| nxp:NX_P60709-1 | nxp:NX_P63261-1 | nxp:NX_Q562R1-1 | nxp:NX_P63267-1 | nxp:NX_P62736-1 | nxp:NX_P68133-1 | nxp:NX_P68032-1
VVLEGGIDPILR	170	1280.76	2	| nxp:NX_P05164-1 | nxp:NX_P05164-3
NFPSPVDAAFR	170	1220.61	1	| nxp:NX_P02790-1
GALQNIIPASTGAAK	170	1411.79	1	| nxp:NX_P04406-1
CQVAGWGSQR	170	1148.53	1	| nxp:NX_P20160-1
VLGAFSDGLAHLDNLK	169	1669.89	2	| nxp:NX_P02042-1 | nxp:NX_P68871-1
LRPVAAEVYGTERQPR	169	1842	1	| nxp:NX_P02788-1
SNLCALCIGDEQGENKCVPNSNER	169	2764.21	1	| nxp:NX_P02788-1
CCSAGCATFCSLPNDKEGSCPQVNINFPQLGLCR	169	3917.7	1	| nxp:NX_Q14508-1
DQCQVDSQCPGQM(+15.994900)K	168	1696.67	3	| nxp:NX_Q14508-2 | nxp:NX_Q14508-3 | nxp:NX_Q14508-1
ANPTVTLFPPSSEELQANK	168	2043.04	2	| nxp:NX_B9A064-1 | contaminant_NRL_1MCOL
DYAEVGR	168	809.379	2	| nxp:NX_P00738-2 | nxp:NX_P00738-1
DSPIQCIQAIAENR	168	1614.79	1	| nxp:NX_P02788-1
FVYHLSDLCK	167	1281.63	1	| nxp:NX_P01591-1
GDTIQLYLGAK	166	1178.64	2	| nxp:NX_Q8TDL5-2 | nxp:NX_Q8TDL5-1
CYTAVVPLVYGGETK	166	1656.83	1	| nxp:NX_P01591-1
CFQWQR	166	924.414	1	| nxp:NX_P02788-1
IDSGLYLGSGYFTAIQNLR	166	2088.08	1	| nxp:NX_P02788-1
GNFHAVYRDDLKK	166	1562.81	1	| nxp:NX_P05109-1
IPLDMVAGFNTPLVK	166	1614.89	1	| nxp:NX_Q8TDL5-1
LCTVATLRETYGEMADCCAK	165	2349.03	2	| nxp:NX_P02768-3 | nxp:NX_P02768-1
YTACLCDDNPK	165	1356.56	1	| nxp:NX_P12273-1
KVFERCELAR	165	1307.69	1	| nxp:NX_P61626-1
AAQLPDMPLEELGQQVDCDR	165	2285.05	1	| nxp:NX_Q9HC84-1
VTIAQGGVLPNIQAV	164	1479.85	13	| nxp:NX_Q99878-1 | nxp:NX_Q16777-1 | nxp:NX_Q9BTM1-1 | nxp:NX_P0C0S8-1 | nxp:NX_P04908-1 | nxp:NX_Q93077-1 | nxp:NX_P20671-1 | nxp:NX_Q7L7L0-1 | nxp:NX_Q8IUE6-1 | nxp:NX_Q6FI13-1 | nxp:NX_Q96QV6-1 | nxp:NX_P16104-1 | nxp:NX_Q9BTM1-2
QDNIADAVACAK	164	1275.6	1	| nxp:NX_P61626-1
DTLM(+15.994900)ISR	163	851.429	5	| nxp:NX_P01859-1 | nxp:NX_P01861-1 | nxp:NX_P01857-1 | nxp:NX_P01860-1 | contaminant_NRL_1MCOH
ALASYVAACQAAGVVIEDWR	163	2150.07	1	| nxp:NX_Q9Y6R7-1
NDEELNK	162	861.395	13	| nxp:NX_Q99878-1 | nxp:NX_Q16777-1 | nxp:NX_Q9BTM1-1 | nxp:NX_P0C0S8-1 | nxp:NX_P04908-1 | nxp:NX_Q93077-1 | nxp:NX_P20671-1 | nxp:NX_Q7L7L0-1 | nxp:NX_Q8IUE6-1 | nxp:NX_Q6FI13-1 | nxp:NX_Q96QV6-1 | nxp:NX_P16104-1 | nxp:NX_Q9BTM1-2
LRTEGDGVYTLNDKK	162	1708.89	3	| nxp:NX_P00739-1 | nxp:NX_P00739-2 | nxp:NX_P00738-1
CLRDGAGDVAFIR	162	1449.73	1	| nxp:NX_P02788-1
CVPNSNER	162	975.431	1	| nxp:NX_P02788-1
KSPIFGPEEVNSVEGNSVSITCYYPPTSVNR	161	3427.65	2	| contaminant_PIGR_HUMAN | nxp:NX_P01833-1
ITPNLAEFAFSLYR	161	1641.86	2	| nxp:NX_P01009-2 | nxp:NX_P01009-1
VPLQQNFQDNQFQGK	161	1790.88	2	| nxp:NX_P80188-2 | nxp:NX_P80188-1
GSWGTVCDDSWDTSDANVVCR	160	2386.97	8	| nxp:NX_Q9UGM3-4 | nxp:NX_Q9UGM3-8 | nxp:NX_Q9UGM3-2 | nxp:NX_Q9UGM3-5 | nxp:NX_Q9UGM3-3 | nxp:NX_Q9UGM3-1 | nxp:NX_Q9UGM3-7 | nxp:NX_Q9UGM3-6
TTGIVMDSGDGVTHTVPIYEGYALPHAILR	160	3183.61	2	| nxp:NX_P60709-1 | nxp:NX_P63261-1
SSIGLINEK	160	960.536	2	| nxp:NX_Q8TDL5-2 | nxp:NX_Q8TDL5-1
EGTCPEAPTDECKPVK	160	1817.8	1	| nxp:NX_P02787-1
RCCPDTCGIK	159	1266.54	1	| nxp:NX_P03973-1
FFESFGDLSTPDAVM(+15.994900)GNPK	159	2074.94	1	| nxp:NX_P68871-1
LFVESYELILQEGTFK	159	1916.01	1	| nxp:NX_Q9HC84-1
PATGGVKKPHR	158	1147.67	4	| nxp:NX_Q71DI3-1 | nxp:NX_Q16695-1 | nxp:NX_P68431-1 | nxp:NX_Q5TEC6-1
LRTEGDGVYTLNNEKQWINK	158	2378.21	2	| nxp:NX_P00738-2 | nxp:NX_P00738-1
LRVDPVNFK	158	1087.63	2	| nxp:NX_P69905-1 | nxp:NX_P02008-1
QGFGNVATNTDGK	158	1308.62	1	| nxp:NX_P02675-1
DCYCRIPACIAGERR	158	1896.86	1	| nxp:NX_P59666-1
LGSTQIVK	158	845.509	1	| nxp:NX_Q8TDL5-1
QLGCGWAM(+15.994900)SAPGNAR	157	1591.71	8	| nxp:NX_Q9UGM3-4 | nxp:NX_Q9UGM3-8 | nxp:NX_Q9UGM3-2 | nxp:NX_Q9UGM3-5 | nxp:NX_Q9UGM3-3 | nxp:NX_Q9UGM3-1 | nxp:NX_Q9UGM3-7 | nxp:NX_Q9UGM3-6
TEDTIFLR	157	994.52	2	| nxp:NX_P02763-1 | nxp:NX_P19652-1
LVRPEVDVM(+15.994900)CTAFHDNEETFLKK	157	2794.35	2	| nxp:NX_P02768-3 | nxp:NX_P02768-1
KAPDAGGCLHADPDLGVLCPTGCQLQEALLQQERPIR	157	4084.02	1	| nxp:NX_P02675-1
NQADCIPFFR	156	1267.59	2	| nxp:NX_P05164-1 | nxp:NX_P05164-3
VFIFPPSDEQLK	156	1419.75	1	| nxp:NX_P01834-1
VPPPPPCCHPR	156	1313.62	1	| nxp:NX_P01877-1
VPPRIDSGLYLGSGYFTAIQNLR	156	2537.35	1	| nxp:NX_P02788-1
KLLETECPQYIR	156	1549.8	1	| nxp:NX_P05109-1
YAYVVDACQPTCR	156	1602.7	1	| nxp:NX_Q9HC84-1
SEDCLCAALSSYVHACAAK	154	2112.91	2	| nxp:NX_P98088-1 | nxp:NX_Q9HC84-1
AVGDKLPECEADDGCPKPPEIAHGYVEHSVR	154	3432.59	1	| nxp:NX_P00738-1
ADLSGITGAR	154	960.511	1	| nxp:NX_P01011-1
VVRDPQGIR	154	1039.6	1	| nxp:NX_P61626-1
DVFLGMFLYEYAR	153	1623.79	2	| nxp:NX_P02768-2 | nxp:NX_P02768-1
SYPGLTSYLVR	152	1255.67	2	| nxp:NX_P80188-2 | nxp:NX_P80188-1
EIVLTQSPGTLSLSPGER	152	1884.01	1	| nxp:NX_P01619-1
QDGSVDFGR	152	980.443	1	| nxp:NX_P02675-1
TPGAVNACHLSCSALLQDNIADAVACAKR	151	3083.48	1	| nxp:NX_P61626-1
DLTDYLMK	150	998.486	8	| nxp:NX_P63267-2 | nxp:NX_P60709-1 | nxp:NX_P63261-1 | nxp:NX_Q562R1-1 | nxp:NX_P63267-1 | nxp:NX_P62736-1 | nxp:NX_P68133-1 | nxp:NX_P68032-1
LVAASQAALGL	150	1013.6	3	| nxp:NX_P02768-3 | nxp:NX_P02768-2 | nxp:NX_P02768-1
AIHCPRPHDFENGEYWPR	150	2281.04	2	| nxp:NX_P00751-2 | nxp:NX_P00751-1
TPCTVSCNIPVVSGK	150	1618.79	1	| nxp:NX_P02675-1
SLGLPENHIVFPVPIDQCIDG	150	2320.16	1	| nxp:NX_P80188-1
DIAPTLTLYVGKK	149	1418.83	4	| nxp:NX_P00738-2 | nxp:NX_P00739-1 | nxp:NX_P00739-2 | nxp:NX_P00738-1
GTEAAGAM(+15.994900)FLEAIPM(+15.994900)SIPPEVK	149	2291.13	1	| nxp:NX_P01009-1
ACYCRIPACIAGERR	149	1852.87	1	| nxp:NX_P59665-1
CGLTDNENCLK	149	1323.57	1	| nxp:NX_Q9HC84-1
FCGLPQPETVGQLGTVLR	148	1972.03	2	| nxp:NX_P05164-1 | nxp:NX_P05164-3
GDQLILNLNNISSDR	148	1671.87	1	| nxp:NX_Q8TDL5-1
AQLCEDHCVDGCFCPPGTVLDDITHSGCLPLGQCPCTHGGR	147	4653.96	1	| nxp:NX_Q9HC84-1
NSPLDEENLTQENQDR	146	1901.85	3	| nxp:NX_P01011-3 | nxp:NX_P01011-2 | nxp:NX_P01011-1
ALEESNYELEGK	146	1381.65	2	| nxp:NX_P13645-1 | contaminant_KERATIN03
CYCRIPACIAGERR	146	1781.84	2	| nxp:NX_P59666-1 | nxp:NX_P59665-1
CCVECPPCPAPPVAGPSVFLFPPKPK	146	2908.4	1	| nxp:NX_P01859-1
LRPVAAEVYGTER	145	1460.79	1	| nxp:NX_P02788-1
DLQNFLKK	145	1005.57	1	| nxp:NX_P06702-1
GAYPLSIEPIGVR	144	1371.76	1	| nxp:NX_P00450-1
HKVYACEVTHQGLSSPVTK	144	2141.08	1	| nxp:NX_P01834-1
ADAVTLDGGFIYEAGLAPYK	144	2071.04	1	| nxp:NX_P02788-1
HPPPPPFQNQQRPPRR	144	1949.04	1	| nxp:NX_Q16378-1
IQEVAGSLIFR	144	1232.7	1	| nxp:NX_Q9HD89-1
HPNSPLDEENLTQENQDR	142	2135.96	3	| nxp:NX_P01011-3 | nxp:NX_P01011-2 | nxp:NX_P01011-1
SM(+15.994900)GGKEDLIWELLNQAQEHFGKDK	142	2789.36	1	| nxp:NX_P02787-1
AGVCPPKKSAQCLR	142	1571.81	1	| nxp:NX_P03973-1
SCYFIPNEGVPGDSTRK	142	1926.9	1	| nxp:NX_P08118-1
FPTDQLTPDQER	141	1446.69	2	| nxp:NX_P05164-1 | nxp:NX_P05164-3
RLGMDGYR	141	967.478	1	| nxp:NX_P61626-1
DETYVPKEFNAETFTFHADICTLSEK	140	3092.42	3	| nxp:NX_P02768-3 | nxp:NX_P02768-2 | nxp:NX_P02768-1
FQLFGSPSGQKDLLFKDSAIGFSR	140	2645.37	1	| nxp:NX_P02788-1
TFVNITPAEVGVLVGKDR	140	1915.06	1	| nxp:NX_P07737-1
NSFEDPCSLSVENENYAR	140	2130.9	1	| nxp:NX_Q9HC84-1
ADSSPVKAGVETTTPSK	139	1674.85	2	| nxp:NX_P0DOY2-1 | nxp:NX_P0DOY3-1
LFPDFFTR	139	1042.54	1	| nxp:NX_P24158-1
VNHVTLSQPK	139	1122.63	1	| nxp:NX_P61769-1
TVTAM(+15.994900)DVVYALKR	139	1482.8	1	| nxp:NX_P62805-1
GATGGLCDLTCPPTK	139	1547.72	1	| nxp:NX_Q9HC84-1
TFDGDVFRFPGLCNYVFSEHCR	139	2723.21	1	| nxp:NX_Q9HC84-1
RTVAAPSVFIFPPSDEQLK	138	2102.13	1	| nxp:NX_P01834-1
DASGATFTWTPSSGK	138	1512.7	1	| nxp:NX_P01877-1
MCLNYEVR	138	1084.49	1	| nxp:NX_P98088-1
YLQEIYNSNNQK	137	1513.73	2	| nxp:NX_P02679-2 | nxp:NX_P02679-1
ELDESLQVAER	136	1288.64	3	| nxp:NX_P10909-6 | nxp:NX_P10909-5 | nxp:NX_P10909-2
SASDLTWDNLK	136	1249.61	1	| nxp:NX_P02787-1
RAIRHPQYNQR	136	1438.78	1	| nxp:NX_P08311-1
QKWEAEPVYVQR	136	1532.79	1	| nxp:NX_P25311-1
NPSGHCLVDLPGLEGCYPK	136	2112.98	1	| nxp:NX_Q9HC84-1
LCYVALDFEQEMATAASSSSLEK	135	2550.17	3	| nxp:NX_P60709-1 | nxp:NX_P63261-1 | nxp:NX_Q6S8J3-1
WLQGSQELPREK	135	1470.77	2	| nxp:NX_P01877-1 | nxp:NX_P01876-1
RHPDYSVV	135	972.49	2	| nxp:NX_P02768-2 | nxp:NX_P02768-1
LSQRFPK	135	875.51	2	| nxp:NX_P02768-2 | nxp:NX_P02768-1
FLASVSTVLTSK	135	1252.71	1	| nxp:NX_P69905-1
LTDPNSAFSR	135	1107.54	1	| nxp:NX_Q9HC84-1
LVRPEVDVM	134	1057.57	2	| nxp:NX_P02768-3 | nxp:NX_P02768-1
VYALPEDLVEVNPK	134	1585.85	2	| nxp:NX_P13796-2 | nxp:NX_P13796-1
VRGPPVSCIKR	134	1268.73	1	| nxp:NX_P02788-1
FLEQQNQVLQTK	133	1475.79	5	| nxp:NX_Q7Z794-1 | nxp:NX_P35908-1 | contaminant_KERATIN13 | nxp:NX_P04264-1 | contaminant_KERATIN22
QNQIAVDEIR	133	1185.62	2	| nxp:NX_P05164-1 | nxp:NX_P05164-3
SLGECCDVEDSTTCFNAK	133	2092.83	1	| nxp:NX_P02774-3
AADKLGSTQIVK	133	1230.71	1	| nxp:NX_Q8TDL5-1
AVTLSLDGGDTAIR	133	1388.74	1	| nxp:NX_Q9HC84-1
VYTVDLGR	132	922.499	2	| contaminant_PIGR_HUMAN | nxp:NX_P01833-1
NVPLPVIAELPPK	132	1386.84	2	| nxp:NX_P01871-1 | nxp:NX_P01871-2
GGQEHFAHLLILR	132	1490.82	1	| nxp:NX_P02763-1
ASYLDCIR	132	997.477	1	| nxp:NX_P02787-1
CLAYDFYPGK	132	1233.56	1	| nxp:NX_P25311-1
VQCSPDVGLTCR	132	1391.64	1	| nxp:NX_P98088-1
FLENEDRR	131	1078.53	2	| nxp:NX_P01009-2 | nxp:NX_P01009-1
QGFFPQEPLSVTWSESGQGVTAR	131	2508.22	1	| nxp:NX_P01876-1
AHYGGFTVQNEANK	131	1535.72	1	| nxp:NX_P02675-1
CSTSSLLEACTFR	130	1531.69	1	| nxp:NX_P02787-1
DSAIGFSR	130	852.421	1	| nxp:NX_P02788-1
LQDAEIAR	129	915.489	1	| nxp:NX_P06703-1
SAVTALWGKVNVDEVGGEALGR	129	2228.17	1	| nxp:NX_P68871-1
SDISFQNTGFLAWYNSFPSDATLR	128	2737.29	9	| nxp:NX_Q9UGM3-9 | nxp:NX_Q9UGM3-4 | nxp:NX_Q9UGM3-8 | nxp:NX_Q9UGM3-2 | nxp:NX_Q9UGM3-5 | nxp:NX_Q9UGM3-3 | nxp:NX_Q9UGM3-1 | nxp:NX_Q9UGM3-7 | nxp:NX_Q9UGM3-6
RMPCAEDYLSVVLNQLCVLHEKTPVSDR	128	3329.64	3	| nxp:NX_P02768-3 | nxp:NX_P02768-2 | nxp:NX_P02768-1
LESDVSAQM(+15.994900)EYCR	128	1603.67	1	| nxp:NX_P02675-1
VLSGGTTMYPGIADR	127	1537.77	6	| nxp:NX_P63267-2 | nxp:NX_P60709-1 | nxp:NX_P63261-1 | nxp:NX_P63267-1 | nxp:NX_P62736-1 | nxp:NX_P68032-1
WYVVGLAGNAILR	127	1431.81	2	| nxp:NX_P80188-2 | nxp:NX_P80188-1
KAPDAGGCLHADPDLGVLCPTGCQLQEALLQQERPI	127	3927.91	1	| nxp:NX_P02675-1
VDCGYPHVTPK	127	1272.6	1	| nxp:NX_Q07654-1
VCGLCGNFDDNAINDFATR	127	2158.93	1	| nxp:NX_Q9HC84-1
HQGVM(+15.994900)VGM(+15.994900)GQK	126	1203.56	7	| nxp:NX_P60709-1 | nxp:NX_P63261-1 | nxp:NX_Q562R1-1 | nxp:NX_P63267-1 | nxp:NX_P62736-1 | nxp:NX_P68133-1 | nxp:NX_P68032-1
TTPPMLDSDGSFFLYSK	126	1905.89	2	| nxp:NX_P01859-1 | nxp:NX_P01860-1
NNIFM(+15.994900)SNSYPR	126	1358.62	2	| nxp:NX_P05164-1 | nxp:NX_P05164-3
SGSDEVQVGQQR	126	1289.61	1	| nxp:NX_P01024-1
LCAGTGENK	126	949.441	1	| nxp:NX_P02788-1
M(+15.994900)HEGDEGPGHHHKPGLGEGTP	126	2191.96	1	| nxp:NX_P06702-1
VVLGAHNLSR	126	1065.62	1	| nxp:NX_P08246-1
VCSTWGDFHYK	126	1399.61	1	| nxp:NX_Q9HC84-1
LSCLGASLQK	126	1076.58	1	| nxp:NX_Q9HC84-1
SASLHLPK	125	852.494	2	| nxp:NX_P01009-2 | nxp:NX_P01009-1
GLIDEVNQDFTNR	125	1520.73	2	| nxp:NX_P02671-2 | nxp:NX_P02671-1
QLEQVIAK	125	928.546	2	| nxp:NX_P02671-2 | nxp:NX_P02671-1
VTAAPQSVCALR	125	1272.67	1	| nxp:NX_P01023-1
AQYEEIAQR	124	1107.54	10	| contaminant_KERATIN21 | contaminant_KERATIN18 | nxp:NX_P02538-1 | nxp:NX_P48668-1 | nxp:NX_P04259-1 | nxp:NX_Q01546-1 | nxp:NX_P35908-1 | contaminant_KERATIN22 | nxp:NX_P19013-1 | contaminant_KERATIN16
CQGRVEVLYR	124	1279.66	9	| nxp:NX_Q9UGM3-9 | nxp:NX_Q9UGM3-4 | nxp:NX_Q9UGM3-8 | nxp:NX_Q9UGM3-2 | nxp:NX_Q9UGM3-5 | nxp:NX_Q9UGM3-3 | nxp:NX_Q9UGM3-1 | nxp:NX_Q9UGM3-7 | nxp:NX_Q9UGM3-6
SPTLGASNR	124	902.469	2	| nxp:NX_P05164-1 | nxp:NX_P05164-3
YKAAFTECCQAADK	124	1662.72	1	| nxp:NX_P02768-1
DSGFQMNQLR	124	1195.55	1	| nxp:NX_P02787-1
TLDGGFIYEAGLAPYK	124	1714.87	1	| nxp:NX_P02788-1
RGGICNGDGGTPLVCEGLAHGVASFSLGPCGR	124	3228.51	1	| nxp:NX_P20160-1
EIPAWVPFDPAAQITK	124	1782.94	1	| nxp:NX_P25311-1
IQCCETVNVCR	124	1438.62	1	| nxp:NX_P98088-1
LRTEGDGVYTLNNEK	123	1708.85	2	| nxp:NX_P00738-2 | nxp:NX_P00738-1
SPLFMGK	123	779.412	1	| nxp:NX_P01009-1
ALGHCLQEVWGHVGADDLCQECEDIVHILNK	123	3615.68	1	| nxp:NX_P07988-1
AYLEEECPATLR	123	1451.68	1	| nxp:NX_P25311-1
VLCCETPR	123	1034.48	1	| nxp:NX_P98088-1
GFSPKDVLVR	122	1117.64	3	| nxp:NX_P01877-1 | contaminant_I47175 | nxp:NX_P01876-1
TPVSDRVTK	122	1002.56	3	| nxp:NX_P02768-3 | nxp:NX_P02768-2 | nxp:NX_P02768-1
LICQATGFSPR	122	1249.64	2	| nxp:NX_P01871-1 | nxp:NX_P01871-2
GVAGGSVAVLCPYNR	122	1519.77	1	| nxp:NX_P01833-1
DGAGDVAFVK	122	978.489	1	| nxp:NX_P02787-1
EVGTPHGIILDSVDAAFICPGSSR	122	2498.23	1	| nxp:NX_P02790-1
TVQIAAVVDVIR	122	1283.77	1	| nxp:NX_P12273-1
KATGPPVSELITK	122	1340.78	1	| nxp:NX_P16401-1
CVWEIEVNSGYR	121	1511.69	9	| nxp:NX_Q9UGM3-9 | nxp:NX_Q9UGM3-4 | nxp:NX_Q9UGM3-8 | nxp:NX_Q9UGM3-2 | nxp:NX_Q9UGM3-5 | nxp:NX_Q9UGM3-3 | nxp:NX_Q9UGM3-1 | nxp:NX_Q9UGM3-7 | nxp:NX_Q9UGM3-6
DVCKNYAEAKDVFLGM(+15.994900)FLYEYAR	121	2818.32	2	| nxp:NX_P02768-2 | nxp:NX_P02768-1
HDNEETFLKK	121	1260.62	2	| nxp:NX_P02768-3 | nxp:NX_P02768-1
SAGWNIPIGLLYCDLPEPR	121	2171.1	1	| nxp:NX_P02787-1
EVQLVESGGGLVQPGGSLR	120	1882	9	| nxp:NX_P01766-1 | nxp:NX_A0A0C4DH35-1 | nxp:NX_A0A0C4DH30-1 | nxp:NX_A0A0J9YX35-1 | nxp:NX_P01780-1 | nxp:NX_A0A0B4J1X5-1 | nxp:NX_P01763-1 | nxp:NX_P01764-1 | nxp:NX_A0A0B4J1Y9-1
KGNYAER	120	837.421	9	| nxp:NX_Q99878-1 | nxp:NX_Q16777-1 | nxp:NX_Q9BTM1-1 | nxp:NX_P0C0S8-1 | nxp:NX_Q93077-1 | nxp:NX_Q8IUE6-1 | nxp:NX_Q6FI13-1 | nxp:NX_Q96QV6-1 | nxp:NX_Q9BTM1-2
CVWDIEVQNNYR	120	1595.73	9	| nxp:NX_Q9UGM3-9 | nxp:NX_Q9UGM3-4 | nxp:NX_Q9UGM3-8 | nxp:NX_Q9UGM3-2 | nxp:NX_Q9UGM3-5 | nxp:NX_Q9UGM3-3 | nxp:NX_Q9UGM3-1 | nxp:NX_Q9UGM3-7 | nxp:NX_Q9UGM3-6
LSPSCPDALAPK	120	1255.64	2	| nxp:NX_P98088-1 | nxp:NX_Q9HC84-1
KASYLDCIR	120	1125.57	1	| nxp:NX_P02787-1
GPDFFTR	120	839.405	1	| nxp:NX_P20160-1
TAM(+15.994900)DVVYALKR	120	1282.68	1	| nxp:NX_P62805-1
LLGNVLVCVLAHHFGKEFTPPVQAAYQK	120	3136.68	1	| nxp:NX_P68871-1
CPAPVGCPEGAR	120	1270.57	1	| nxp:NX_P98088-1
TGCCYSCEEDSCQVR	120	1910.68	1	| nxp:NX_Q9HC84-1
ADDKETCFAEEGK	119	1499.63	3	| nxp:NX_P02768-3 | nxp:NX_P02768-2 | nxp:NX_P02768-1
SVTWSESGQGVTAR	119	1464.71	1	| nxp:NX_P01876-1
CSTSPLLEACEFLR	119	1682.79	1	| nxp:NX_P02788-1
AMGIMNSFVNDIFER	118	1743.82	14	| nxp:NX_Q99879-1 | nxp:NX_Q99880-1 | nxp:NX_Q16778-1 | nxp:NX_P33778-1 | nxp:NX_P23527-1 | nxp:NX_O60814-1 | nxp:NX_P58876-1 | nxp:NX_P57053-1 | nxp:NX_Q93079-1 | nxp:NX_P06899-1 | nxp:NX_Q8N257-1 | nxp:NX_P62807-1 | nxp:NX_Q99877-1 | nxp:NX_Q5QNW6-2
YKAAFTECCQAADKAACLLPK	118	2416.15	1	| nxp:NX_P02768-1
HPYFYAPELLFFAK	118	1742.89	1	| nxp:NX_P02768-1
SVQWCAVSQPEATK	118	1590.76	1	| nxp:NX_P02788-1
TPGAVNACHLSC	118	1286.56	1	| nxp:NX_P61626-1
FISDHSITR	117	1075.55	9	| nxp:NX_Q9UGM3-9 | nxp:NX_Q9UGM3-4 | nxp:NX_Q9UGM3-8 | nxp:NX_Q9UGM3-2 | nxp:NX_Q9UGM3-5 | nxp:NX_Q9UGM3-3 | nxp:NX_Q9UGM3-1 | nxp:NX_Q9UGM3-7 | nxp:NX_Q9UGM3-6
QLGCGWAMLAPGNAR	117	1601.77	5	| nxp:NX_Q9UGM3-5 | nxp:NX_Q9UGM3-3 | nxp:NX_Q9UGM3-1 | nxp:NX_Q9UGM3-7 | nxp:NX_Q9UGM3-6
KASGPPVSELITK	117	1326.76	3	| nxp:NX_P16403-1 | nxp:NX_P10412-1 | nxp:NX_P16402-1
TCVADESAENCDKSLHTLFGDK	117	2497.1	2	| nxp:NX_P02768-3 | nxp:NX_P02768-1
VYKPCGPIQPATCNSR	117	1847.89	1	| nxp:NX_Q9HC84-1
MPCAEDYLSVVLNQLCVLHEK	116	2518.21	3	| nxp:NX_P02768-3 | nxp:NX_P02768-2 | nxp:NX_P02768-1
IPCFLAGDTR	116	1149.57	3	| nxp:NX_P11678-1 | nxp:NX_P05164-1 | nxp:NX_P05164-3
VQWKVDNALQSGNSQESVTEQDSKDSTYSLSSTLTLSK	116	4161.01	1	| nxp:NX_P01834-1
KGDTFSCM(+15.994900)VGHEALPLAFTQK	116	2353.13	1	| nxp:NX_P01876-1
WCAVSEHEATK	116	1317.59	1	| nxp:NX_P02787-1
TPAQFDADELR	116	1262.6	1	| nxp:NX_P04083-1
CQWTEWFDEDYPKSEQLGGDVESYDKIR	116	3480.53	1	| nxp:NX_Q9HC84-1
DDTYGPYSSPSLR	115	1457.65	9	| nxp:NX_Q9UGM3-9 | nxp:NX_Q9UGM3-4 | nxp:NX_Q9UGM3-8 | nxp:NX_Q9UGM3-2 | nxp:NX_Q9UGM3-5 | nxp:NX_Q9UGM3-3 | nxp:NX_Q9UGM3-1 | nxp:NX_Q9UGM3-7 | nxp:NX_Q9UGM3-6
TEGDGVYTLNDKK	115	1439.7	3	| nxp:NX_P00739-1 | nxp:NX_P00739-2 | nxp:NX_P00738-1
VTVLGQPK	115	841.514	2	| nxp:NX_B9A064-1 | contaminant_NRL_1MCOL
NTGIICTIGPASR	114	1359.7	2	| nxp:NX_P14618-2 | nxp:NX_P14618-1
THQGLSSPVTK	114	1154.62	1	| nxp:NX_P01834-1
SEEEVAAR	114	890.421	1	| nxp:NX_P02788-1
VIGSGCNLDSAR	113	1248.6	7	| nxp:NX_P00338-5 | nxp:NX_P00338-2 | nxp:NX_P00338-4 | nxp:NX_P07864-1 | nxp:NX_Q6ZMR3-1 | nxp:NX_P07195-1 | nxp:NX_P00338-3
SEDTAVYYCAR	113	1334.57	5	| nxp:NX_P01742-1 | nxp:NX_P01743-1 | nxp:NX_A0A0C4DH29-1 | nxp:NX_A0A0B4J2H0-1 | nxp:NX_P0DP01-1
GSVTFHCALGPEVANVAK	113	1856.93	2	| contaminant_PIGR_HUMAN | nxp:NX_P01833-1
HQSACKDSDWPFCSDEDWNYKCPSGCR	113	3392.32	2	| nxp:NX_P02671-2 | nxp:NX_P02671-1
NYCGLPGEYWLGNDK	113	1785.79	1	| nxp:NX_P02675-1
IMNGEADAMSLDGGFVYIAGK	113	2159.01	1	| nxp:NX_P02787-1
VPSHAVVAR	113	935.542	1	| nxp:NX_P02788-1
QCSILHGPTFAACR	113	1617.76	1	| nxp:NX_Q9HC84-1
GNYAER	112	709.326	9	| nxp:NX_Q99878-1 | nxp:NX_Q16777-1 | nxp:NX_Q9BTM1-1 | nxp:NX_P0C0S8-1 | nxp:NX_Q93077-1 | nxp:NX_Q8IUE6-1 | nxp:NX_Q6FI13-1 | nxp:NX_Q96QV6-1 | nxp:NX_Q9BTM1-2
ALAAAGYDVEK	112	1107.57	5	| nxp:NX_P22492-1 | nxp:NX_P16403-1 | nxp:NX_Q02539-1 | nxp:NX_P10412-1 | nxp:NX_P16402-1
FQDNGR	112	736.337	3	| nxp:NX_P11678-1 | nxp:NX_P05164-1 | nxp:NX_P05164-3
SVFPLAPSSK	112	1032.57	2	| nxp:NX_P01857-1 | contaminant_NRL_1MCOH
EVGPTNADPVCLAK	112	1470.73	1	| nxp:NX_P00450-1
ISSPTETER	112	1019.5	1	| nxp:NX_P31949-1
VLCCETPK	112	1006.47	1	| nxp:NX_P98088-1
LCAGTGENKCAFSSQEPYFSYSGAFK	111	2906.28	1	| nxp:NX_P02788-1
M(+15.994900)LNPPNFCEM(+15.994900)DGQCKR	111	2028.84	1	| nxp:NX_P03973-1
AQYEDIAQK	111	1065.52	1	| nxp:NX_P04264-1
LAHYNK	110	745.399	15	| nxp:NX_Q99879-1 | nxp:NX_Q99880-1 | nxp:NX_Q16778-1 | nxp:NX_P33778-1 | nxp:NX_P23527-1 | nxp:NX_O60814-1 | nxp:NX_P58876-1 | nxp:NX_Q93079-1 | nxp:NX_P06899-1 | nxp:NX_Q8N257-1 | nxp:NX_P62807-1 | nxp:NX_Q99877-1 | nxp:NX_Q5QNW6-2 | nxp:NX_Q6DRA6-1 | nxp:NX_Q6DN03-1
ESYSVYVYK	110	1137.55	9	| nxp:NX_Q99879-1 | nxp:NX_Q99880-1 | nxp:NX_O60814-1 | nxp:NX_P58876-1 | nxp:NX_P57053-1 | nxp:NX_Q93079-1 | nxp:NX_P62807-1 | nxp:NX_Q99877-1 | nxp:NX_Q5QNW6-2
TTPPM(+15.994900)LDSDGSFFLYSK	110	1921.89	2	| nxp:NX_P01859-1 | nxp:NX_P01860-1
TKELTSELKENFIR	110	1707.93	2	| nxp:NX_P80188-2 | nxp:NX_P80188-1
AEDAPGVPLR	110	1024.54	1	| nxp:NX_P98088-1
DIQMTQSPSSLSASVGDR	109	1878.89	6	| nxp:NX_P04430-1 | nxp:NX_P01597-1 | nxp:NX_P01601-1 | nxp:NX_P01599-1 | nxp:NX_A0A075B6S5-1 | nxp:NX_P01594-1
ILGGHLDAK	109	923.531	4	| nxp:NX_P00738-2 | nxp:NX_P00739-1 | nxp:NX_P00739-2 | nxp:NX_P00738-1
AATGECTATVGKR	109	1321.65	3	| nxp:NX_P01042-3 | nxp:NX_P01042-2 | nxp:NX_P01042-1
CDYWIR	109	912.403	2	| nxp:NX_P80188-2 | nxp:NX_P80188-1
NWEQEGVFK	109	1136.54	1	| nxp:NX_Q9HC84-1
QLGCGWAM(+15.994900)SAPGNAQFGQGSGPIVLDDVR	108	3004.4	9	| nxp:NX_Q9UGM3-9 | nxp:NX_Q9UGM3-4 | nxp:NX_Q9UGM3-8 | nxp:NX_Q9UGM3-2 | nxp:NX_Q9UGM3-5 | nxp:NX_Q9UGM3-3 | nxp:NX_Q9UGM3-1 | nxp:NX_Q9UGM3-7 | nxp:NX_Q9UGM3-6
VFDEFKPLVEEPQNLIKQNCELFEQLGEYK	108	3683.83	3	| nxp:NX_P02768-3 | nxp:NX_P02768-2 | nxp:NX_P02768-1
ETPAATEAPSSTPK	108	1386.67	2	| nxp:NX_P80723-2 | nxp:NX_P80723-1
TPLGDTTHTCPR	108	1355.64	1	| nxp:NX_P01860-1
SLDLDSIIAEVK	108	1302.72	1	| nxp:NX_P04264-1
VPTANVSVVDLTCR	108	1530.79	1	| nxp:NX_P04406-1
ALANSLACQGK	107	1132.58	1	| nxp:NX_P04075-2
CPTCPCATFVEYSR	107	1747.72	1	| nxp:NX_Q9HC84-1
QVGSGVTTDQVQAEAK	106	1617.81	2	| nxp:NX_P01871-1 | nxp:NX_P01871-2
PLEKQHEKER	106	1293.69	2	| nxp:NX_P02763-1 | nxp:NX_P19652-1
VCSQYAAYGEK	106	1275.57	1	| nxp:NX_P02774-3
LLETECPQYIRK	106	1549.8	1	| nxp:NX_P05109-1
NM(+15.994900)ACYCR	106	990.359	1	| nxp:NX_P59665-1
NQLPPICYNYEIR	106	1679.82	1	| nxp:NX_P98088-1
TPDTCPLFCDFYNPHGGCEWHYQPCGAPCLK	106	3784.55	1	| nxp:NX_Q9HC84-1
CVVVGDGAVGK	105	1060.55	10	| nxp:NX_P60953-1 | nxp:NX_P60953-2 | nxp:NX_P84095-1 | nxp:NX_P63000-1 | nxp:NX_P60763-1 | nxp:NX_P15153-1 | nxp:NX_Q9H4E5-2 | nxp:NX_P17081-1 | nxp:NX_P63000-2 | nxp:NX_Q9H4E5-1
SGCVRDDTYGPYSSPSLR	105	2016.91	9	| nxp:NX_Q9UGM3-9 | nxp:NX_Q9UGM3-4 | nxp:NX_Q9UGM3-8 | nxp:NX_Q9UGM3-2 | nxp:NX_Q9UGM3-5 | nxp:NX_Q9UGM3-3 | nxp:NX_Q9UGM3-1 | nxp:NX_Q9UGM3-7 | nxp:NX_Q9UGM3-6
DAQYAPGYDK	105	1127.5	1	| nxp:NX_P00751-1
YVGGQEHFAHLLILRDT	105	1969.03	1	| nxp:NX_P02763-1
HQTVPQNTGGKNPDPWAK	105	1974.98	1	| nxp:NX_P02787-1
LTWASHEK	105	971.495	1	| nxp:NX_P06702-1
TCPLNMQHQECGSPCTDTCSNPQR	105	2878.14	1	| nxp:NX_Q9HC84-1
LTPLQFGNLQK	105	1258.72	1	| nxp:NX_Q9HC84-1
YSAEAQAMQHQCTCCQER	105	2257.88	1	| nxp:NX_Q9HC84-1
VDCNTCTCR	105	1185.44	1	| nxp:NX_Q9HC84-1
TEAPLNPK	104	869.473	12	| nxp:NX_P63267-2 | nxp:NX_Q9BYX7-1 | nxp:NX_P60709-1 | nxp:NX_P63261-1 | nxp:NX_Q562R1-1 | nxp:NX_P63267-1 | nxp:NX_P62736-1 | nxp:NX_P68133-1 | nxp:NX_P68032-1 | nxp:NX_P0CG39-1 | nxp:NX_P0CG38-1 | nxp:NX_Q6S8J3-1
TEGDGVYTLNDK	104	1311.61	3	| nxp:NX_P00739-1 | nxp:NX_P00739-2 | nxp:NX_P00738-1
ATKEQLKAVMDDFAAFVEK	104	2141.09	3	| nxp:NX_P02768-3 | nxp:NX_P02768-2 | nxp:NX_P02768-1
TLLEGEESR	104	1033.52	2	| contaminant_KERATIN13 | nxp:NX_P04264-1
CCM(+15.994900)GMCGK	104	1019.32	1	| nxp:NX_P03973-1
VFDKDGNGYISAAELR	104	1754.87	1	| nxp:NX_P0DP23-1
NILDRQDPPSVVVTSHQAPGEK	104	2387.23	1	| nxp:NX_P25311-1
GQPREPQVYTLPPSREEMTK	103	2343.18	3	| nxp:NX_P01859-1 | nxp:NX_P01860-1 | contaminant_NRL_1MCOH
STSESTAALGCLVK	103	1423.71	2	| nxp:NX_P01859-1 | nxp:NX_P01861-1
NSLFEYQK	103	1028.5	2	| nxp:NX_P02671-2 | nxp:NX_P02671-1
CGGFLVR	103	808.413	1	| nxp:NX_P08311-1
LLTEAPLNPK	102	1095.64	12	| nxp:NX_P63267-2 | nxp:NX_Q9BYX7-1 | nxp:NX_P60709-1 | nxp:NX_P63261-1 | nxp:NX_Q562R1-1 | nxp:NX_P63267-1 | nxp:NX_P62736-1 | nxp:NX_P68133-1 | nxp:NX_P68032-1 | nxp:NX_P0CG39-1 | nxp:NX_P0CG38-1 | nxp:NX_Q6S8J3-1
DDKETCFAEEGKK	102	1556.69	3	| nxp:NX_P02768-3 | nxp:NX_P02768-2 | nxp:NX_P02768-1
DSPIQCIQAIAENRADAV	102	1970.96	1	| nxp:NX_P02788-1
YYCFQGNQFLR	102	1495.68	1	| nxp:NX_P02790-1
MLNPPNFCEMDGQCKR	102	1996.85	1	| nxp:NX_P03973-1
VIEHIMEDLDTNADKQLSFEEFI	102	2736.31	1	| nxp:NX_P06702-1
MDTPSSYEAAMELFSPDQDMR	102	2421	1	| nxp:NX_P11684-1
DTLPQKPR	102	954.537	1	| nxp:NX_P11684-1
DEGYTFCESPR	102	1360.55	1	| nxp:NX_P98088-1
DGTTAASCKDMAK	102	1355.59	1	| nxp:NX_Q9HC84-1
TVTINCPFKTENAQK	101	1750.88	2	| contaminant_PIGR_HUMAN | nxp:NX_P01833-1
GLEGCYPK	101	923.429	2	| nxp:NX_P98088-1 | nxp:NX_Q9HC84-1
CVAELGPQAVGAVK	101	1398.74	1	| nxp:NX_Q96QR1-1
ASQHGSDVVIETDFGLR	101	1830.9	1	| nxp:NX_Q9Y6R7-1
QLGCGWAMSAPGNAWFGQGSGPIALDDVR	100	3018.4	9	| nxp:NX_Q9UGM3-9 | nxp:NX_Q9UGM3-4 | nxp:NX_Q9UGM3-8 | nxp:NX_Q9UGM3-2 | nxp:NX_Q9UGM3-5 | nxp:NX_Q9UGM3-3 | nxp:NX_Q9UGM3-1 | nxp:NX_Q9UGM3-7 | nxp:NX_Q9UGM3-6
QGHFYGETAAVYVAVEERK	100	2154.06	2	| contaminant_PIGR_HUMAN | nxp:NX_P01833-1
TDTSHHDQDHPTFNK	100	1779.77	2	| nxp:NX_P01009-2 | nxp:NX_P01009-1
IGLDLPALNMQR	100	1340.74	2	| nxp:NX_P05164-1 | nxp:NX_P05164-3
AVLTIDEKGTEAAGAM(+15.994900)FLEAIPM(+15.994900)SIPPEVK	100	3160.62	1	| nxp:NX_P01009-1
MEEVEAM(+15.994900)LLPETLK	100	1648.82	1	| nxp:NX_P01011-1
EDPQGDAAQKTDTSHHDQDHPTFNK	99	2819.23	2	| nxp:NX_P01009-2 | nxp:NX_P01009-1
ATEHLSTLSEK	99	1215.62	1	| nxp:NX_P02647-1
NACHLSCSALLQDNIADAVACAK	99	2502.15	1	| nxp:NX_P61626-1
GLMCANSQQSPPLCHDYELR	99	2376.05	1	| nxp:NX_Q9HC84-1
SCHLAM(+15.994900)APN	98	1016.43	1	| nxp:NX_P02788-1
SCVSPVK	98	776.397	1	| nxp:NX_P03973-1
VVPLVAGGICQCLAER	98	1741.91	1	| nxp:NX_P07988-1
QICVGDR	98	847.409	1	| nxp:NX_P08311-1
DALVLTPASLWKPSSPVSQ	98	1996.08	1	| nxp:NX_Q8TDL5-1
SCHLAM(+15.994900)APNHAVVSRM(+15.994900)DKVER	97	2440.16	1	| nxp:NX_P02788-1
TGLLVEQSGDYIK	97	1422.75	1	| nxp:NX_Q9HC84-1
EELPYSR	97	893.436	1	| nxp:NX_Q9HC84-1
EIAQDFKTDLR	96	1335.69	4	| nxp:NX_Q71DI3-1 | nxp:NX_Q16695-1 | nxp:NX_P68431-1 | nxp:NX_P84243-1
VTLTSEEEAR	96	1134.56	2	| nxp:NX_P00338-4 | nxp:NX_P00338-3
HQSACKDSDWPFCSDEDWNYK	96	2675.06	2	| nxp:NX_P02671-2 | nxp:NX_P02671-1
ERGPEEEHLGILGPVIWAEVGDTIR	96	2772.43	1	| nxp:NX_P00450-1
LESDVSAQMEYCR	96	1587.68	1	| nxp:NX_P02675-1
VIETLLMDTPSSYEAAMELFSPDQDMREAGAQLKK	96	3914.89	1	| nxp:NX_P11684-1
VHTECCHGDLLECADDR	95	2086.84	2	| nxp:NX_P02768-2 | nxp:NX_P02768-1
IKNQADCIPFFR	95	1508.77	2	| nxp:NX_P05164-1 | nxp:NX_P05164-3
DPCTANPFR	95	1077.48	2	| nxp:NX_P98088-1 | nxp:NX_Q9HC84-1
VNVDAVGGEALGR	95	1256.66	1	| nxp:NX_P02042-1
FDEFFSEGCAPGSK	95	1577.66	1	| nxp:NX_P02787-1
YSLTYIYTGLSK	95	1408.74	1	| nxp:NX_P25311-1
LLVDSEGWVK	94	1145.62	2	| contaminant_PIGR_HUMAN | nxp:NX_P01833-1
VFAIPPSFASIFLTK	94	1637.93	2	| nxp:NX_P01871-1 | nxp:NX_P01871-2
EVDLKDYEDQQK	94	1509.71	2	| nxp:NX_P02671-2 | nxp:NX_P02671-1
TGDEITYQCR	94	1242.54	2	| nxp:NX_P08603-2 | nxp:NX_P08603-1
HQTVPQNTGGK	94	1166.59	1	| nxp:NX_P02787-1
KCSTSPLLEACEFLRK	94	1938.98	1	| nxp:NX_P02788-1
M(+15.994900)HEGDEGPGHHHKPGL	94	1750.77	1	| nxp:NX_P06702-1
SNVSDAVAQSTR	94	1234.6	1	| nxp:NX_P60174-3
AGALNSNDAFVLK	93	1319.7	3	| nxp:NX_P06396-4 | nxp:NX_P06396-3 | nxp:NX_P06396-1
EILSVDCSTNNPSQAK	93	1762.83	3	| nxp:NX_P10909-6 | nxp:NX_P10909-5 | nxp:NX_P10909-2
AHDQKVEGCFNQLLYDIR	93	2206.07	1	| nxp:NX_O60635-1
KGGETSEMYLIQPDSSVKPYR	93	2385.18	1	| nxp:NX_P02675-1
LQELHLSSNGLESLSPEFLRPVPQLR	93	2959.6	1	| nxp:NX_P02750-1
SCESNSPFPVHPGTAECCTK	93	2264.94	1	| nxp:NX_P02774-3
FGRNGSDCPDKFCLFQSETK	93	2393.06	1	| nxp:NX_P02788-1
LVDTLPQKPRESIIK	93	1737.03	1	| nxp:NX_P11684-1
GHFDTLSK	93	904.452	1	| nxp:NX_P80511-1
VTMQNLNDR	92	1090.53	10	| nxp:NX_Q7Z3Z0-1 | nxp:NX_Q7Z3Y8-1 | nxp:NX_Q7Z3Y7-1 | nxp:NX_Q7Z3Y9-1 | contaminant_KERATIN08 | contaminant_KERATIN05 | nxp:NX_P02533-1 | nxp:NX_P08779-1 | nxp:NX_P13645-1 | contaminant_KERATIN03
ATLVCLISDFYPGAVTVAWK	92	2211.15	3	| nxp:NX_P0DOY2-1 | nxp:NX_P0DOY3-1 | nxp:NX_B9A064-1
THNLEPYFESFINNLR	92	1993.98	2	| contaminant_KERATIN13 | nxp:NX_P04264-1
YLGEEYVK	92	1000.5	1	| nxp:NX_P02787-1
WCALSHHER	92	1195.54	1	| nxp:NX_P02787-1
CCPDTCGIKCLDPVDTPNPTR	92	2476.07	1	| nxp:NX_P03973-1
SVTEQGAELSNEER	92	1548.71	1	| nxp:NX_P63104-1
ADDGCPKPPEIAHGYVEHSVR	91	2334.09	2	| nxp:NX_P00738-2 | nxp:NX_P00738-1
GLTEGLHGFHVHEFGDNTAGCTSAGPHFNPLSR	91	3519.62	1	| nxp:NX_P00441-1
NLNEKDYELLCLDGTR	91	1952.94	1	| nxp:NX_P02787-1
TVLQNTDGNNNEAWAK	91	1774.84	1	| nxp:NX_P02788-1
LGNGVQCLAMGWGLLGR	91	1801.92	1	| nxp:NX_P08246-1
AGEVQEPELR	91	1127.57	1	| nxp:NX_P25311-1
CGLTDSETCLK	91	1283.56	1	| nxp:NX_P98088-1
WFDVDFPSPGPHGGDKETYNNIIR	91	2761.3	1	| nxp:NX_P98088-1
ELSEALGQIFDSQR	91	1592.79	1	| nxp:NX_Q08380-1
MCYNYR	91	906.36	1	| nxp:NX_Q9HC84-1
ALEEANADLEVK	90	1301.66	11	| nxp:NX_P13646-2 | nxp:NX_P13646-3 | contaminant_KERATIN06 | nxp:NX_P19012-1 | nxp:NX_P13646-1 | contaminant_KERATIN04 | contaminant_KERATIN08 | contaminant_KERATIN05 | nxp:NX_P02533-1 | contaminant_KERATIN07 | nxp:NX_P08779-1
ILLNPQDKDGSFSVVITGLRK	90	2300.3	2	| contaminant_PIGR_HUMAN | nxp:NX_P01833-1
TITGM(+15.994900)CNNR	90	1082.47	2	| nxp:NX_P05164-1 | nxp:NX_P05164-3
ITLLSALVETR	90	1215.73	1	| nxp:NX_P01011-1
DYFMPCPGR	90	1142.48	1	| nxp:NX_P02790-1
ELGICPDDAAVIPIKNNR	90	1995.03	1	| nxp:NX_P12273-1
YYYDGKDYIEFNKEIPAWVPFDPAAQITK	90	3481.7	1	| nxp:NX_P25311-1
QLDSIVGER	89	1016.54	6	| contaminant_KERATIN21 | contaminant_KERATIN18 | nxp:NX_P02538-1 | nxp:NX_P48668-1 | contaminant_KERATIN17 | nxp:NX_P13647-1
LAPITSDPTEATAVGAVEASFK	89	2175.12	2	| nxp:NX_P14618-3 | nxp:NX_P14618-1
QYTDSTFR	89	1017.46	1	| nxp:NX_P00450-1
EQLGEFYEALDCLCIPR	89	2112.97	1	| nxp:NX_P19652-1
YYYDGKDYIEFNK	89	1717.77	1	| nxp:NX_P25311-1
WSSWYNGHRPEPGLGGGDFETFENLR	89	3008.37	1	| nxp:NX_Q9HC84-1
ESYSIYVYK	88	1151.56	7	| nxp:NX_Q16778-1 | nxp:NX_P33778-1 | nxp:NX_P23527-1 | nxp:NX_P06899-1 | nxp:NX_Q8N257-1 | nxp:NX_Q6DRA6-1 | nxp:NX_Q6DN03-1
LRTEGDGVYTLNDK	88	1580.79	3	| nxp:NX_P00739-1 | nxp:NX_P00739-2 | nxp:NX_P00738-1
GLIDEVNQDFTNRINK	88	1875.96	2	| nxp:NX_P02671-2 | nxp:NX_P02671-1
EYTDASFTNR	88	1203.53	1	| nxp:NX_P00450-1
HQQTVTIPPK	88	1148.64	1	| nxp:NX_P01024-1
VDGALCMEK	88	1022.46	1	| nxp:NX_P02790-1
HFCGGALIHAR	88	1238.62	1	| nxp:NX_P20160-1
TIVEFHMTTEAQATIR	88	1847.93	1	| nxp:NX_Q8TDL5-1
TWLVPDSR	88	973.51	1	| nxp:NX_Q9HC84-1
GSFTSSSNFMSIR	87	1420.65	9	| nxp:NX_Q9UGM3-9 | nxp:NX_Q9UGM3-4 | nxp:NX_Q9UGM3-8 | nxp:NX_Q9UGM3-2 | nxp:NX_Q9UGM3-5 | nxp:NX_Q9UGM3-3 | nxp:NX_Q9UGM3-1 | nxp:NX_Q9UGM3-7 | nxp:NX_Q9UGM3-6
FSGSGSGTDFTLK	87	1303.62	7	| nxp:NX_A0A075B6S2-1 | nxp:NX_A0A0A0MRZ7-1 | nxp:NX_P01615-1 | nxp:NX_A0A075B6S6-1 | nxp:NX_P06310-1 | nxp:NX_A2NJV5-1 | nxp:NX_P01614-1
QEYDESGPSIVHRK	87	1644.8	7	| nxp:NX_Q9BYX7-1 | nxp:NX_P60709-1 | nxp:NX_P63261-1 | nxp:NX_P0CG39-1 | nxp:NX_P0CG38-1 | nxp:NX_Q6S8J3-1 | nxp:NX_A5A3E0-1
MDDFAAFVEK	87	1172.53	3	| nxp:NX_P02768-3 | nxp:NX_P02768-2 | nxp:NX_P02768-1
TVTINCPFKTENAQKR	87	1906.98	2	| contaminant_PIGR_HUMAN | nxp:NX_P01833-1
LSPSCPDALAPKDPCTANPFRK	87	2442.19	2	| nxp:NX_P98088-1 | nxp:NX_Q9HC84-1
FVYHLSDLCKK	87	1409.72	1	| nxp:NX_P01591-1
EGYYGYTGAFR	87	1283.57	1	| nxp:NX_P02787-1
ALAAGGYDVEK	87	1093.55	1	| nxp:NX_P16401-1
TAMDVVYALKR	87	1266.69	1	| nxp:NX_P62805-1
TCRNPSGHCLVDLPGLEGCYPK	87	2530.16	1	| nxp:NX_Q9HC84-1
CLPSKDYAEVGR	86	1394.67	2	| nxp:NX_P00738-2 | nxp:NX_P00738-1
LYHSEAFTVNFGDTEEAKK	86	2186.04	2	| nxp:NX_P01009-2 | nxp:NX_P01009-1
YAATSQVLLPSK	86	1277.71	2	| nxp:NX_P01871-1 | nxp:NX_P01871-2
AGVANALAHKYH	86	1251.66	2	| nxp:NX_P02042-1 | nxp:NX_P68871-1
CCESASEDCMAK	86	1447.5	1	| nxp:NX_P02774-3
VRGPPVSCIK	86	1112.62	1	| nxp:NX_P02788-1
ALYEAGER	86	908.447	1	| nxp:NX_P04083-1
GNFHAVYRDDLK	86	1434.71	1	| nxp:NX_P05109-1
TYLISSIPLQGAFNYK	86	1814.97	1	| nxp:NX_P12273-1
AWVAWR	86	788.42	1	| nxp:NX_P61626-1
TNQELQEINR	85	1244.62	2	| nxp:NX_A6NMY6-1 | nxp:NX_P07355-2
SQYEQLAEQNR	85	1365.64	2	| nxp:NX_P13645-1 | contaminant_KERATIN03
CLVEKGDVAFVK	85	1364.72	1	| nxp:NX_P02787-1
TIAPALVSK	85	899.556	1	| nxp:NX_P06733-1
CIESLIAVFQK	85	1307.7	1	| nxp:NX_P31949-1
YWCNDGKTPGAV	85	1367.6	1	| nxp:NX_P61626-1
KQCPCDHFK	85	1219.53	1	| nxp:NX_Q6UXB2-1
EITALAPSTM(+15.994900)K	84	1177.61	7	| nxp:NX_P63267-2 | nxp:NX_P60709-1 | nxp:NX_P63261-1 | nxp:NX_P63267-1 | nxp:NX_P62736-1 | nxp:NX_P68133-1 | nxp:NX_P68032-1
TGGVKKPHR	84	979.58	5	| nxp:NX_Q71DI3-1 | nxp:NX_Q16695-1 | nxp:NX_P68431-1 | nxp:NX_P84243-1 | nxp:NX_Q5TEC6-1
ILLNPQDK	84	940.546	2	| contaminant_PIGR_HUMAN | nxp:NX_P01833-1
VSVFVPPR	84	900.53	2	| nxp:NX_P01871-1 | nxp:NX_P01871-2
GVAGGSVAVLCPYNRK	84	1647.86	1	| nxp:NX_P01833-1
M(+15.994900)HEGDEGPGHHHKPGLGEG	84	1993.86	1	| nxp:NX_P06702-1
AVLCPQPTR	84	1041.55	1	| nxp:NX_P15153-1
EDVPAFQALGSLNDLQFFR	84	2167.08	1	| nxp:NX_P25311-1
CM(+15.994900)GTVTLNQAR	84	1266.59	1	| nxp:NX_P49913-1
NCQSCLCTER	84	1327.52	1	| nxp:NX_P98088-1
GQWGTVCDNLWDLTDASVVCR	84	2452.1	1	| nxp:NX_Q08380-1
AAYEDFNVQLRR	84	1481.75	1	| nxp:NX_Q9HC84-1
NWYVDGVEVHNAK	83	1530.73	3	| nxp:NX_P01859-1 | nxp:NX_P01861-1 | nxp:NX_P01857-1
VYCDMNTENGGWTVIQNR	83	2156.95	1	| nxp:NX_P02675-1
CLKDGAGDVAFVK	83	1379.7	1	| nxp:NX_P02787-1
TAGWNIPMGLLYNK	83	1577.81	1	| nxp:NX_P02787-1
VIEHIM(+15.994900)EDLDTNADKQLSFEEFIMLMAR	83	3354.61	1	| nxp:NX_P06702-1
YEGGREHVAHLLFLR	83	1796.96	1	| nxp:NX_P19652-1
QVEGMEDWKQDSQLQK	83	1948.91	1	| nxp:NX_P25311-1
EEGLVCR	83	862.409	1	| nxp:NX_P98088-1
IKIIAPPERK	82	1164.75	8	| nxp:NX_P63267-2 | nxp:NX_P60709-1 | nxp:NX_P63261-1 | nxp:NX_Q562R1-1 | nxp:NX_P63267-1 | nxp:NX_P62736-1 | nxp:NX_P68133-1 | nxp:NX_P68032-1
TAVCDIPPR	82	1028.52	7	| nxp:NX_P07437-1 | nxp:NX_P04350-1 | nxp:NX_Q3ZCM7-1 | nxp:NX_A6NNZ2-1 | nxp:NX_P68371-1 | nxp:NX_Q13885-1 | nxp:NX_Q9BVA1-1
VLNQLCVLHEK	82	1352.74	3	| nxp:NX_P02768-3 | nxp:NX_P02768-2 | nxp:NX_P02768-1
SGGGGGGGLGSGGSIR	82	1232.6	2	| contaminant_KERATIN02 | nxp:NX_P35527-1
SLNNQFASFIDKVR	82	1638.86	2	| contaminant_KERATIN13 | nxp:NX_P04264-1
VSEADSSNADWVTK	82	1508.69	2	| nxp:NX_P00751-2 | nxp:NX_P00751-1
DCQDIANK	82	963.42	2	| nxp:NX_P02679-2 | nxp:NX_P02679-1
SLMFMQWGQLLDHDLDFTPEPAAR	82	2818.33	2	| nxp:NX_P05164-1 | nxp:NX_P05164-3
LLDNWDSVTSTFSK	82	1612.79	1	| nxp:NX_P02647-1
DELRDEGK	82	961.458	1	| nxp:NX_P02768-1
AAEVYGTERQPR	82	1376.69	1	| nxp:NX_P02788-1
GLGTDEDTLIEILASR	82	1702.89	1	| nxp:NX_P04083-1
VIETLLM(+15.994900)DTPSSYEAAM(+15.994900)ELFSPDQDMR	82	3121.41	1	| nxp:NX_P11684-1
FYTIEILKVE	82	1254.7	1	| nxp:NX_P12273-1
ADLSGMSGAR	82	964.452	1	| nxp:NX_P30740-1
QLGCGWAM(+15.994900)SAPGNAWFGQGSGPIALDDVR	81	3034.39	9	| nxp:NX_Q9UGM3-9 | nxp:NX_Q9UGM3-4 | nxp:NX_Q9UGM3-8 | nxp:NX_Q9UGM3-2 | nxp:NX_Q9UGM3-5 | nxp:NX_Q9UGM3-3 | nxp:NX_Q9UGM3-1 | nxp:NX_Q9UGM3-7 | nxp:NX_Q9UGM3-6
SRCPDGSTCCELPSGK	81	1810.75	2	| nxp:NX_P28799-2 | nxp:NX_P28799-1
ELTSELKENFIR	81	1478.78	2	| nxp:NX_P80188-2 | nxp:NX_P80188-1
FNKPFVFLMIEQNTK	81	1855.98	1	| nxp:NX_P01009-1
TYGQCLMLNPPNFCEMDGQCKR	81	2719.16	1	| nxp:NX_P03973-1
M(+15.994900)LNPPNFCEMDGQCKR	81	2012.84	1	| nxp:NX_P03973-1
VLGAFSDGLAHLDNLKGTFATLSELHCDKLHVDPENFR	81	4237.11	1	| nxp:NX_P68871-1
TKLEEHLEGIVNIFHQYSVR	81	2412.27	1	| nxp:NX_P80511-1
QLGCGWAMSAPGNAQFGQGSGPIVLDDVR	80	2988.41	9	| nxp:NX_Q9UGM3-9 | nxp:NX_Q9UGM3-4 | nxp:NX_Q9UGM3-8 | nxp:NX_Q9UGM3-2 | nxp:NX_Q9UGM3-5 | nxp:NX_Q9UGM3-3 | nxp:NX_Q9UGM3-1 | nxp:NX_Q9UGM3-7 | nxp:NX_Q9UGM3-6
DKETCFAEEGKK	80	1441.66	3	| nxp:NX_P02768-3 | nxp:NX_P02768-2 | nxp:NX_P02768-1
KECCEKPLLEK	80	1433.71	2	| nxp:NX_P02768-2 | nxp:NX_P02768-1
TNLESILSYPK	80	1264.68	2	| nxp:NX_P05155-1 | nxp:NX_P05155-3
AKWEMPFDPQDTHQSR	80	1972.9	1	| nxp:NX_P01011-1
DIQMTQSPSTLSASVGDR	80	1892.9	1	| nxp:NX_P01602-1
SSVLPGCAEPWNHGK	80	1638.77	1	| nxp:NX_P01876-1
THYYAVAVVKK	80	1278.72	1	| nxp:NX_P02788-1
CLAENAGDVAFVKDVTVLQNTDGNNNEAWAK	80	3363.59	1	| nxp:NX_P02788-1
AYLEEECPATLRK	80	1579.78	1	| nxp:NX_P25311-1
AAYEDFNVQLR	80	1325.65	1	| nxp:NX_Q9HC84-1
FSALEVDETYVPK	79	1497.75	3	| nxp:NX_P02768-3 | nxp:NX_P02768-2 | nxp:NX_P02768-1
STGSWSTLK	79	966.489	2	| nxp:NX_P00751-2 | nxp:NX_P00751-1
ALVLIAFAQYLQQCPFEDHVKLVNEVTEFAK	79	3620.88	2	| nxp:NX_P02768-3 | nxp:NX_P02768-1
LTGMAFR	79	795.418	2	| nxp:NX_P04406-1 | nxp:NX_O14556-1
AVSNEIVRFPTDQLTPDQER	79	2315.16	2	| nxp:NX_P05164-1 | nxp:NX_P05164-3
HGSPVDICTAKPR	79	1437.73	1	| nxp:NX_P01008-1
AKWEM(+15.994900)PFDPQDTHQSR	79	1988.89	1	| nxp:NX_P01011-1
TKKQELSEAEQATR	79	1618.84	1	| nxp:NX_P01024-1
KGDTFSCMVGHEALPL	79	1761.83	1	| nxp:NX_P01876-1
VQPYLDDFQKK	79	1380.72	1	| nxp:NX_P02647-1
KFPSGTFEQVSQLVK	79	1694.91	1	| nxp:NX_P02774-3
LKCDEWSVNSVGKIECVSAETTEDCIAK	79	3228.49	1	| nxp:NX_P02787-1
NSIIDVYHK	79	1088.57	1	| nxp:NX_P05109-1
RAWVAWR	79	944.521	1	| nxp:NX_P61626-1
VFLENVIR	79	989.578	1	| nxp:NX_P62805-1
ASSYLSLTPEQWK	78	1509.76	6	| nxp:NX_A0M8Q6-1 | nxp:NX_P0DOY2-1 | nxp:NX_P0DOY3-1 | nxp:NX_P0CF74-1 | nxp:NX_B9A064-1 | contaminant_NRL_1MCOL
MVGDVTGAQAYASTAK	78	1569.76	3	| nxp:NX_P13164-1 | nxp:NX_Q01629-1 | nxp:NX_Q01628-1
EAIPM(+15.994900)SIPPEVK	78	1326.7	1	| nxp:NX_P01009-1
TFTCTAAYPESKTPLTATLSK	78	2288.15	1	| nxp:NX_P01876-1
SVIPSDGPSVACVKK	78	1543.81	1	| nxp:NX_P02787-1
LVNANGEAVYCK	78	1337.65	1	| nxp:NX_P04040-1
SLVNLGGSK	78	874.499	1	| nxp:NX_P04264-1
QDVDNASLAR	78	1088.53	1	| nxp:NX_P08670-1
KAEEEHLGILGPQLHADVGDKVK	77	2483.33	1	| nxp:NX_P00450-1
SCHLAM(+15.994900)APNHAVV	77	1422.66	1	| nxp:NX_P02788-1
VIEHIM(+15.994900)EDLDTNADKQLSFEEF	77	2639.22	1	| nxp:NX_P06702-1
QFPFLASIQNQGR	77	1505.79	1	| nxp:NX_P20160-1
AGQAVDDFIEK	77	1192.58	1	| nxp:NX_P52209-1
VVRDPQGI	77	883.5	1	| nxp:NX_P61626-1
TLQALEFHTVPFQLLAR	77	1984.1	1	| nxp:NX_Q08380-1
FKM(+15.994900)CFNYEIR	77	1423.65	1	| nxp:NX_Q9HC84-1
LAADDFR	76	807.399	26	| nxp:NX_P13646-2 | nxp:NX_P08727-1 | contaminant_KERATIN10 | nxp:NX_Q14525-1 | nxp:NX_Q15323-1 | nxp:NX_O76013-2 | nxp:NX_P13646-3 | nxp:NX_P05783-1 | nxp:NX_Q04695-1 | nxp:NX_Q14532-1 | nxp:NX_O76014-1 | nxp:NX_Q92764-1 | nxp:NX_O76015-1 | contaminant_KERATIN06 | nxp:NX_P19012-1 | nxp:NX_P13646-1 | nxp:NX_Q7Z3Y7-1 | nxp:NX_O76013-1 | contaminant_KERATIN08 | contaminant_KERATIN05 | nxp:NX_P02533…
EPQVYTLPPSREEM(+15.994900)TK	76	1920.94	3	| nxp:NX_P01859-1 | nxp:NX_P01860-1 | contaminant_NRL_1MCOH
FSSSSGYGGGSSR	76	1235.53	2	| contaminant_KERATIN02 | nxp:NX_P35527-1
NYAEAKDVFLGMFLYEYAR	76	2300.11	2	| nxp:NX_P02768-2 | nxp:NX_P02768-1
SLHTLFGDKLCTVATLRETYGEMADCCAK	76	3347.55	2	| nxp:NX_P02768-3 | nxp:NX_P02768-1
LQCYNCPNPTADCK	76	1740.71	2	| nxp:NX_P13987-1 | nxp:NX_P13987-2
PVDTPNPTR	76	996.511	1	| nxp:NX_P03973-1
CCMGM(+15.994900)CGK	76	1019.32	1	| nxp:NX_P03973-1
NIETIINTFHQYS	76	1579.78	1	| nxp:NX_P06702-1
VIETLLMDTPSSYEAAMELFSPDQDMREAGAQLK	76	3786.79	1	| nxp:NX_P11684-1
AKAYLEEECPATLR	76	1650.82	1	| nxp:NX_P25311-1
LGVQDLFNSSK	76	1207.63	1	| nxp:NX_P30740-1
AAPEASGTPSSDAVSR	76	1502.71	1	| nxp:NX_P31146-1
NQKDPGVLDR	76	1141.6	1	| nxp:NX_P31949-1
LGMDGYRGISLANWMCLAK	76	2156.04	1	| nxp:NX_P61626-1
AEACVCTYNGQR	76	1428.6	1	| nxp:NX_P98088-1
AVSALGNAYFGSGSGPITLDDVECSGTESTLWQCR	75	3705.68	9	| nxp:NX_Q9UGM3-9 | nxp:NX_Q9UGM3-4 | nxp:NX_Q9UGM3-8 | nxp:NX_Q9UGM3-2 | nxp:NX_Q9UGM3-5 | nxp:NX_Q9UGM3-3 | nxp:NX_Q9UGM3-1 | nxp:NX_Q9UGM3-7 | nxp:NX_Q9UGM3-6
YGLVTYATYPK	75	1275.66	2	| nxp:NX_P00751-2 | nxp:NX_P00751-1
TSTADYAM(+15.994900)FK	75	1150.51	2	| nxp:NX_P02679-2 | nxp:NX_P02679-1
HYYIGIIETTWDYASDHGEK	75	2398.1	1	| nxp:NX_P00450-1
TGLQEVEVK	75	1002.55	1	| nxp:NX_P01024-1
VKSPELQAEAK	75	1199.66	1	| nxp:NX_P02652-1
NDEKNWGLSVYADKPETTK	75	2195.06	1	| nxp:NX_P02763-1
CSPHLVLSALTSDNHGATYAFSGTHYWR	75	3148.47	1	| nxp:NX_P02790-1
ILLAELEQLKGQGK	75	1539.91	1	| nxp:NX_P08670-1
SQESAAPTLSR	75	1146.57	1	| nxp:NX_P98088-1
DRPARHPQEQP	75	1330.66	1	| nxp:NX_Q16378-1
RPCFSALEVDETYVPKEFNAETFTFHADICTLSEK	74	4151.94	3	| nxp:NX_P02768-3 | nxp:NX_P02768-2 | nxp:NX_P02768-1
LFDSDPITVTVPVEVSR	74	1873.99	3	| nxp:NX_P10909-6 | nxp:NX_P10909-5 | nxp:NX_P10909-2
TFDGDVFR	74	956.447	3	| nxp:NX_Q02817-1 | nxp:NX_P98088-1 | nxp:NX_Q9HC84-1
NANFKFTDHLK	74	1334.69	2	| nxp:NX_P00738-2 | nxp:NX_P00738-1
LEDSVTYHCSR	74	1366.61	2	| nxp:NX_P00751-2 | nxp:NX_P00751-1
PACIAGERR	74	1029.53	2	| nxp:NX_P59666-1 | nxp:NX_P59665-1
DNENVVNEYSSELEK	74	1768.79	1	| nxp:NX_P02675-1
GLLYCDLPEPR	74	1332.66	1	| nxp:NX_P02787-1
TTYEKYLGPQYVAGITNLKK	74	2287.23	1	| nxp:NX_P02788-1
PSHAVVAR	74	836.474	1	| nxp:NX_P02788-1
FNTANDDNVTQVR	74	1493.7	1	| nxp:NX_P04040-1
GSGGGSSGGSIGGR	74	1092.5	1	| nxp:NX_P04264-1
EHVAHLLFLR	74	1234.71	1	| nxp:NX_P19652-1
ADQCYEDVR	74	1155.47	1	| nxp:NX_P31146-1
VVTENVPCGTTGTTCSK	74	1810.83	1	| nxp:NX_P98088-1
DRVDCGYPHVTPK	74	1543.73	1	| nxp:NX_Q07654-1
IPLDM(+15.994900)VAGFNTPLVK	74	1630.89	1	| nxp:NX_Q8TDL5-1
CVAQCGCYDKDGNYYDVGAR	74	2370.95	1	| nxp:NX_Q9HC84-1
TLSDYNIQK	73	1081.55	4	| nxp:NX_P62987-1 | nxp:NX_P62979-1 | nxp:NX_P0CG47-1 | nxp:NX_P0CG48-1
AEAQAQYSAAVAK	73	1307.66	4	| nxp:NX_Q14624-4 | nxp:NX_Q14624-3 | nxp:NX_Q14624-2 | nxp:NX_Q14624-1
DGGFCEVCKK	73	1199.52	3	| nxp:NX_P07602-1 | nxp:NX_P07602-2 | nxp:NX_P07602-3
SHCIAEVENDEMPADLPSLAADFVESKDVCKNYAEAK	73	4152.88	2	| nxp:NX_P02768-2 | nxp:NX_P02768-1
RTHLPEVFLSK	73	1326.75	1	| nxp:NX_P02774-3
DDTVCLAK	73	921.435	1	| nxp:NX_P02787-1
GILAADESTGSIAK	73	1332.7	1	| nxp:NX_P04075-2
KACPPLSCSLDEAR	73	1603.76	1	| nxp:NX_P98088-1
VCGLCGNFDDIAVNDFATR	73	2143.95	1	| nxp:NX_P98088-1
LLPPPKNER	73	1063.63	1	| nxp:NX_Q6P5S2-1
CPEPCPPPK	72	1081.48	6	| nxp:NX_Q96RM1-1 | nxp:NX_P22531-1 | nxp:NX_P22532-1 | nxp:NX_P35326-1 | nxp:NX_P35325-1 | nxp:NX_Q9BYE4-1
GGPSVFLFPPKPK	72	1370.78	4	| nxp:NX_P01861-1 | nxp:NX_P01857-1 | nxp:NX_P01860-1 | contaminant_NRL_1MCOH
ATGGVKKPHR	72	1050.62	4	| nxp:NX_Q71DI3-1 | nxp:NX_Q16695-1 | nxp:NX_P68431-1 | nxp:NX_Q5TEC6-1
AQPVQVAEGSEPDGFWEALGGK	72	2272.09	3	| nxp:NX_P06396-4 | nxp:NX_P06396-3 | nxp:NX_P06396-1
SIKYWCLWEGAQNGR	72	1867.89	2	| contaminant_PIGR_HUMAN | nxp:NX_P01833-1
VSEDLR	72	718.373	2	| nxp:NX_P02671-2 | nxp:NX_P02671-1
CAEENCFIQK	72	1298.55	1	| nxp:NX_P01024-1
YVGGQEHFAHLLILRDTK	72	2097.12	1	| nxp:NX_P02763-1
KDSGFQMNQLR	72	1323.65	1	| nxp:NX_P02787-1
CDEWSVNSVGK	72	1280.56	1	| nxp:NX_P02787-1
MYLGYEYVTAIR	72	1478.73	1	| nxp:NX_P02787-1
CLAENAGDVAFVKDV	72	1607.77	1	| nxp:NX_P02788-1
DAGPLLISLK	72	1026.62	1	| nxp:NX_P31146-1
AESFPNTPLADLGQDVICSHTEGLICLNK	72	3199.54	1	| nxp:NX_P98088-1
VGCNTCTCDSR	72	1329.5	1	| nxp:NX_P98088-1
GLM(+15.994900)CANSQQSPPLCHDYELR	72	2392.05	1	| nxp:NX_Q9HC84-1
VTTVASHTSDSDVPSGVTEVVVK	71	2314.18	3	| nxp:NX_P10909-6 | nxp:NX_P10909-5 | nxp:NX_P10909-2
VM(+15.994900)PICLPSKDYAEVGR	71	1850.91	2	| nxp:NX_P00738-2 | nxp:NX_P00738-1
GVDEATIIDILTKR	71	1543.87	1	| nxp:NX_P04083-1
QAGVCFGDSGSPLVCNGLIHGIASFVR	71	2818.38	1	| nxp:NX_P08246-1
LAPITYPQGLALAK	71	1455.86	1	| nxp:NX_P15153-1
TEFLSFMNTELAAFTK	71	1849.9	1	| nxp:NX_P31949-1
FESFGDLSTPDAVMGNPK	71	1911.88	1	| nxp:NX_P68871-1
GNPAVSYVR	71	962.505	1	| nxp:NX_Q9Y6R7-1
FSGSNSGNTATLTISR	70	1612.79	2	| nxp:NX_A0A075B6K5-1 | nxp:NX_P80748-1
FTDHLK	70	760.399	2	| nxp:NX_P00738-2 | nxp:NX_P00738-1
AEDTAVYYCAK	70	1290.57	2	| nxp:NX_P01768-1 | nxp:NX_P01764-1
EGFGHLSPTGTTEFWLGNEK	70	2207.04	2	| nxp:NX_P02679-2 | nxp:NX_P02679-1
VHTECCHGDLLECADDRADLAKYICENQDSISSK	70	4009.74	2	| nxp:NX_P02768-2 | nxp:NX_P02768-1
FICPLTGLWPINTLK	70	1772.98	1	| nxp:NX_P02749-1
TLDLGENQLETLPPDLLR	70	2037.09	1	| nxp:NX_P02750-1
GPPVSCIKR	70	1013.56	1	| nxp:NX_P02788-1
GEADAM(+15.994900)SLDGGYVYTAGK	70	1820.8	1	| nxp:NX_P02788-1
DWHGVPGQVDAAMAGR	70	1666.78	1	| nxp:NX_P04004-1
AIRHPQYNQR	70	1282.68	1	| nxp:NX_P08311-1
CFEGFGIDGPAIAK	70	1481.71	1	| nxp:NX_P08603-1
SLGPALLLLQK	70	1152.74	1	| nxp:NX_P14780-1
YFSTTEDYDHEITGLR	70	1946.88	1	| nxp:NX_Q96DA0-1
AGCVAESTAVCR	70	1280.57	1	| nxp:NX_Q9Y6R7-1
HQGVMVGM(+15.994900)GQK	69	1187.57	7	| nxp:NX_P60709-1 | nxp:NX_P63261-1 | nxp:NX_Q562R1-1 | nxp:NX_P63267-1 | nxp:NX_P62736-1 | nxp:NX_P68133-1 | nxp:NX_P68032-1
LGGHLDAK	69	810.447	4	| nxp:NX_P00738-2 | nxp:NX_P00739-1 | nxp:NX_P00739-2 | nxp:NX_P00738-1
IGFPWSEIR	69	1104.58	4	| nxp:NX_P35241-4 | nxp:NX_P26038-1 | nxp:NX_P15311-1 | nxp:NX_P35241-5
GVALHRPDVYLLPPAR	69	1774.01	2	| nxp:NX_P01871-1 | nxp:NX_P01871-2
YVTSAPM(+15.994900)PEPQAPGR	69	1616.77	2	| nxp:NX_P01871-1 | nxp:NX_P01871-2
LENEIQTYR	69	1165.58	2	| nxp:NX_P13645-1 | contaminant_KERATIN03
GALSLQGSIMTVGEK	69	1490.79	2	| nxp:NX_Q8IWL1-1 | nxp:NX_Q8IWL2-2
AAVYHHFISDGVRK	69	1599.84	1	| nxp:NX_P01024-1
ALDFAVGEYNK	69	1226.61	1	| nxp:NX_P01034-1
QEPSQGTTTYAVTSILR	69	1851.94	1	| nxp:NX_P01877-1
AAEVYGTER	69	995.479	1	| nxp:NX_P02788-1
MHEGDEGPGHHHKPGLGEGTP	69	2175.96	1	| nxp:NX_P06702-1
GIGTDEFTLNR	69	1222.61	1	| nxp:NX_P12429-1
SDVMYTDWKK	69	1272.59	1	| nxp:NX_P19652-1
NYTPQLSEAEVER	69	1535.73	1	| nxp:NX_P22894-1
NMMAACDPR	68	1065.43	9	| nxp:NX_P07437-1 | nxp:NX_P04350-1 | nxp:NX_Q3ZCM7-1 | nxp:NX_P68371-1 | nxp:NX_Q13885-1 | nxp:NX_Q9BVA1-1 | nxp:NX_A6NNZ2-1 | nxp:NX_Q9BUF5-1 | nxp:NX_Q13509-1
M(+15.994900)VGDVTGAQAYASTAK	68	1585.75	3	| nxp:NX_P13164-1 | nxp:NX_Q01629-1 | nxp:NX_Q01628-1
RLDGSVDFKK	68	1164.64	2	| nxp:NX_P02679-2 | nxp:NX_P02679-1
NECFLQHKDDNPNLPR	68	1996.93	2	| nxp:NX_P02768-3 | nxp:NX_P02768-1
QNQIAVDEIRER	68	1470.77	2	| nxp:NX_P05164-1 | nxp:NX_P05164-3
SLLEGEGSSGGGGR	68	1262.6	2	| nxp:NX_P13645-1 | contaminant_KERATIN03
TPENFPCK	68	992.451	1	| nxp:NX_P00747-1
LPPNVVEESAR	68	1210.64	1	| nxp:NX_P01023-1
VQLSNDFDEYIMAIEQTIK	68	2257.11	1	| nxp:NX_P01024-1
KCCVECPPCPAPPVAGPSVFLFPPKPK	68	3036.5	1	| nxp:NX_P01859-1
EVVSLTEACCAEGADPDCYDTR	68	2518.02	1	| nxp:NX_P02774-3
DSAHGFLKVPPR	68	1323.72	1	| nxp:NX_P02787-1
SETKDLLFRDDTVCLAK	68	2011.02	1	| nxp:NX_P02787-1
NDNTECLAR	68	1092.47	1	| nxp:NX_P02788-1
DSPIQCIQAIAENRADAVTLDGGFIYEAGLAPYK	68	3666.81	1	| nxp:NX_P02788-1
VGVNGFGR	68	805.432	1	| nxp:NX_P04406-1
IISNASCTTNCLAPLAK	68	1833.92	1	| nxp:NX_P04406-1
ADAGKEGNNPAENGDAKTDQAQK	68	2329.07	1	| nxp:NX_P05204-1
DQVANSAFVER	68	1235.6	1	| nxp:NX_P07900-2
VSSFLPWIR	68	1104.62	1	| nxp:NX_P08311-1
VFEPCHTVIPPLLFYEGCVFDR	68	2695.3	1	| nxp:NX_P98088-1
CPPSQPFFNEDQMK	68	1724.74	1	| nxp:NX_Q9HC84-1
VAGVANALAHKYH	67	1350.73	2	| nxp:NX_P02042-1 | nxp:NX_P68871-1
SHCIAEVENDEM(+15.994900)PADLPSLAADFVESKDVCKNYAEAK	67	4168.88	2	| nxp:NX_P02768-2 | nxp:NX_P02768-1
NSLDCEIVSAK	67	1235.59	2	| nxp:NX_Q01518-2 | nxp:NX_Q01518-1
IPIEDGSGEVVLSR	67	1470.78	1	| nxp:NX_P01024-1
ATFGCHDGYSLDGPEEIECTK	67	2386	1	| nxp:NX_P02749-1
FDEFFSEGCAPGSKK	67	1705.75	1	| nxp:NX_P02787-1
VRGPPVSCI	67	984.529	1	| nxp:NX_P02788-1
EDAIWNLLR	67	1129.6	1	| nxp:NX_P02788-1
GQYCYELDEK	67	1304.55	1	| nxp:NX_P04004-1
ETIINTFHQYSVK	67	1579.81	1	| nxp:NX_P06702-1
IFGSYDPR	67	954.468	1	| nxp:NX_P08311-1
GLDYASQQGTAALQK	67	1550.78	1	| nxp:NX_P17213-1
CLKDTDCPGIKK	67	1434.71	1	| nxp:NX_P19957-1
FHPGDVIYHTTDGTGGCISAR	67	2261.04	1	| nxp:NX_P98088-1
AESHPEVSIEHLGQVVQCSR	67	2262.09	1	| nxp:NX_P98088-1
SDLAVPSELALLK	67	1355.78	1	| nxp:NX_Q08380-1
YQKEEFCGLLSSPTGPLSSCHK	67	2525.18	1	| nxp:NX_Q9Y6R7-1
M(+15.994900)NSFVNDIFER	66	1387.63	14	| nxp:NX_Q99879-1 | nxp:NX_Q99880-1 | nxp:NX_Q16778-1 | nxp:NX_P33778-1 | nxp:NX_P23527-1 | nxp:NX_O60814-1 | nxp:NX_P58876-1 | nxp:NX_P57053-1 | nxp:NX_Q93079-1 | nxp:NX_P06899-1 | nxp:NX_Q8N257-1 | nxp:NX_P62807-1 | nxp:NX_Q99877-1 | nxp:NX_Q5QNW6-2
ADLINNLGTIAK	66	1242.71	4	| nxp:NX_Q14568-1 | nxp:NX_Q58FF8-1 | nxp:NX_P08238-1 | nxp:NX_P07900-2
TFHADICTLSEKER	66	1706.82	3	| nxp:NX_P02768-3 | nxp:NX_P02768-2 | nxp:NX_P02768-1
RNDEELNKLLGR	66	1456.79	3	| nxp:NX_P04908-1 | nxp:NX_Q93077-1 | nxp:NX_Q7L7L0-1
IPPNDPR	66	808.431	3	| nxp:NX_P11678-1 | nxp:NX_P05164-1 | nxp:NX_P05164-3
IGGIGTVPVGR	66	1025.61	3	| nxp:NX_P68104-1 | nxp:NX_Q5VTE0-1 | nxp:NX_Q05639-1
EVQLVESGGGLVKPGGSLR	66	1882.04	2	| nxp:NX_A0A0B4J1V1-1 | nxp:NX_A0A0B4J1V0-1
PICLPSKDYAEVGR	66	1604.81	2	| nxp:NX_P00738-2 | nxp:NX_P00738-1
KVLGAFSDGLAHLDNLK	66	1797.99	2	| nxp:NX_P02042-1 | nxp:NX_P68871-1
YALYDATYETK	66	1337.63	2	| nxp:NX_P23528-1 | nxp:NX_Q9Y281-1
VSNKGLPAPIEK	66	1252.73	1	| nxp:NX_P01859-1
IEEELGSK	66	904.462	1	| nxp:NX_P06733-1
SSFYVNGLTLGGQK	66	1470.76	1	| nxp:NX_P07737-1
SLGDDISSETSGDFRK	66	1713.79	1	| nxp:NX_P12429-1
APNVVVTR	66	855.505	1	| nxp:NX_P52566-1
DCYCRIPACIAGER	66	1740.76	1	| nxp:NX_P59666-1
IQVYSR	66	765.425	1	| nxp:NX_P61769-1
ACPPLSCSLDEAR	66	1475.66	1	| nxp:NX_P98088-1
SEQLGGDVESYDK	66	1426.63	1	| nxp:NX_Q9HC84-1
VNGVLTALPVSVADGR	66	1567.88	1	| nxp:NX_Q9Y6R7-1
DTNDANVVCR	65	1163.51	9	| nxp:NX_Q9UGM3-9 | nxp:NX_Q9UGM3-4 | nxp:NX_Q9UGM3-8 | nxp:NX_Q9UGM3-2 | nxp:NX_Q9UGM3-5 | nxp:NX_Q9UGM3-3 | nxp:NX_Q9UGM3-1 | nxp:NX_Q9UGM3-7 | nxp:NX_Q9UGM3-6
HQGVM(+15.994900)VGMGQK	65	1187.57	7	| nxp:NX_P60709-1 | nxp:NX_P63261-1 | nxp:NX_Q562R1-1 | nxp:NX_P63267-1 | nxp:NX_P62736-1 | nxp:NX_P68133-1 | nxp:NX_P68032-1
SYELTQPPSVSVSPGQTAR	65	2004	2	| nxp:NX_P01717-1 | nxp:NX_A0A075B6K4-1
LHVDPENFR	65	1126.56	2	| nxp:NX_P02042-1 | nxp:NX_P68871-1
SLHTLFGDK	65	1017.54	2	| nxp:NX_P02768-3 | nxp:NX_P02768-1
GFSSGSAVVSGGSR	65	1254.61	2	| nxp:NX_P35908-1 | contaminant_KERATIN22
VPVAVQGEDTVQSLTQGDGVAK	65	2198.13	1	| nxp:NX_P01024-1
ECEEIIR	65	948.446	1	| nxp:NX_P02675-1
EDGGGWWYNR	65	1239.52	1	| nxp:NX_P02675-1
ATVVYQGER	65	1022.53	1	| nxp:NX_P02749-1
EQLGEFYEALDCLRIPK	65	2081.04	1	| nxp:NX_P02763-1
KKGADVWFK	65	1078.6	1	| nxp:NX_P05109-1
YISPDQLADLYK	65	1425.73	1	| nxp:NX_P06733-1
VIETLLM(+15.994900)DTPSSYEAAMELFSPDQDMREAGAQLKK	65	3930.88	1	| nxp:NX_P11684-1
LDRQDPPSVVVTSHQAPGEK	65	2160.1	1	| nxp:NX_P25311-1
AKAYLEEECPATLRK	65	1778.91	1	| nxp:NX_P25311-1
TATPQQAQEVHEK	65	1466.72	1	| nxp:NX_P60174-3
VLDELTLAR	64	1029.59	11	| nxp:NX_P19012-2 | nxp:NX_P08727-1 | contaminant_KERATIN10 | nxp:NX_Q04695-1 | contaminant_KERATIN06 | nxp:NX_P19012-1 | contaminant_KERATIN08 | contaminant_KERATIN05 | nxp:NX_P02533-1 | contaminant_KERATIN07 | nxp:NX_P08779-1
DVQLEGGCNYDYIEVFDGPYR	64	2509.1	9	| nxp:NX_Q9UGM3-9 | nxp:NX_Q9UGM3-4 | nxp:NX_Q9UGM3-8 | nxp:NX_Q9UGM3-2 | nxp:NX_Q9UGM3-5 | nxp:NX_Q9UGM3-3 | nxp:NX_Q9UGM3-1 | nxp:NX_Q9UGM3-7 | nxp:NX_Q9UGM3-6
SAPATGGVKKPHR	64	1305.74	4	| nxp:NX_Q71DI3-1 | nxp:NX_Q16695-1 | nxp:NX_P68431-1 | nxp:NX_Q5TEC6-1
CDVDIRK	64	905.451	3	| nxp:NX_P60709-1 | nxp:NX_P63261-1 | nxp:NX_Q562R1-1
ESDTSYVSLK	64	1128.54	2	| nxp:NX_P02741-2 | nxp:NX_P02741-1
LVRPEVDVMCT	64	1318.65	2	| nxp:NX_P02768-3 | nxp:NX_P02768-1
LCTVATLRETYGEM(+15.994900)ADCCAK	64	2365.03	2	| nxp:NX_P02768-3 | nxp:NX_P02768-1
KTCVADESAENCDK	64	1626.67	2	| nxp:NX_P02768-3 | nxp:NX_P02768-1
YLQTLTTIAAEK	64	1351.75	2	| nxp:NX_P27105-2 | nxp:NX_P27105-1
WRDSLEFR	64	1108.55	1	| nxp:NX_P01011-1
SNLDEDIIAEENIVSR	64	1816.89	1	| nxp:NX_P01024-1
IVLVDNK	64	800.488	1	| nxp:NX_P01591-1
LLIYGASSR	64	979.557	1	| nxp:NX_P01619-1
HSTIFENLANKADRDQYELLCLDNTR	64	3136.51	1	| nxp:NX_P02787-1
GGYTLVSGYPK	64	1141.59	1	| nxp:NX_P02790-1
QLAEEYLYR	64	1184.59	1	| nxp:NX_P14780-1
RKEDEVEEWQHR	64	1640.78	1	| nxp:NX_P15311-1
EICEVSEENYIR	64	1540.69	1	| nxp:NX_P20061-1
SAVENCQDSWR	64	1351.57	1	| nxp:NX_P52209-1
TVTAMDVVYALK	64	1310.7	1	| nxp:NX_P62805-1
VNVDEVGGEALGRL	64	1427.75	1	| nxp:NX_P68871-1
DGPQQRPPKPGGHHR	64	1663.85	1	| nxp:NX_Q16378-1
GCSFLPDPYQK	63	1311.6	3	| nxp:NX_P07602-1 | nxp:NX_P07602-2 | nxp:NX_P07602-3
GLMATPAK	63	788.433	3	| nxp:NX_P11678-1 | nxp:NX_P05164-1 | nxp:NX_P05164-3
LYGSEAFATDFQDSAAAKK	63	2019.97	2	| nxp:NX_P01011-2 | nxp:NX_P01011-1
SLHTLFGDKLCTVATL	63	1775.94	2	| nxp:NX_P02768-3 | nxp:NX_P02768-1
LFEQVM(+15.994900)R	63	938.476	2	| nxp:NX_P05164-1 | nxp:NX_P05164-3
NSNPALNDNLEK	63	1328.64	1	| nxp:NX_O00299-1
VMDKYTFELSR	63	1388.69	1	| nxp:NX_P02774-3
DLLFKDSAIGFSR	63	1468.78	1	| nxp:NX_P02788-1
LADFALLCLDGKR	63	1491.8	1	| nxp:NX_P02788-1
KDSAIGFSR	63	980.516	1	| nxp:NX_P02788-1
SEIDMNDIK	63	1064.49	1	| nxp:NX_P04083-1
DIVMTQSPDSLAVSLGER	63	1917.96	1	| nxp:NX_P06312-1
AKFYPEDVAEELIQDITQK	63	2237.13	1	| nxp:NX_P15311-1
GNPGSHFCGGTLIHPSFVLTAAHCLR	63	2806.37	1	| nxp:NX_P24158-1
SNFLNCYVSGFHPSDIEVDLLK	63	2554.23	1	| nxp:NX_P61769-1
LASYLDKVR	62	1064.61	13	| nxp:NX_P08727-1 | contaminant_KERATIN10 | nxp:NX_Q04695-1 | contaminant_KERATIN06 | nxp:NX_P19012-1 | contaminant_KERATIN08 | contaminant_KERATIN05 | nxp:NX_P02533-1 | contaminant_KERATIN07 | nxp:NX_P08779-1 | nxp:NX_Q99456-1 | nxp:NX_P13645-1 | contaminant_KERATIN03
QIKKQTALVELVK	62	1497.94	3	| nxp:NX_P02768-3 | nxp:NX_P02768-2 | nxp:NX_P02768-1
TNAENEFVTIK	62	1265.64	2	| contaminant_KERATIN13 | nxp:NX_P04264-1
LLQEGQALEYVCPSGFYPYPVQTR	62	2815.38	2	| nxp:NX_P00751-2 | nxp:NX_P00751-1
EVQLVESGGGLVQPGR	62	1624.87	2	| nxp:NX_P01782-1 | nxp:NX_A0A0A0MS15-1
KVEGTAFVIFGIQDGEQR	62	1994.03	1	| nxp:NX_P01024-1
M(+15.994900)VETALTPDACYPD	62	1598.67	1	| nxp:NX_P01591-1
FTECCQAADK	62	1229.49	1	| nxp:NX_P02768-1
LCM(+15.994900)GSGLNLCEPNNK	62	1722.76	1	| nxp:NX_P02787-1
VPPRIDSGLYLGSGYFT	62	1841.94	1	| nxp:NX_P02788-1
RGPPVSCIKR	62	1169.66	1	| nxp:NX_P02788-1
SEDFGVNEDLADSDAR	62	1739.74	1	| nxp:NX_P04083-1
GGPGSAVSPYPTFNPSSDVAALHK	62	2356.16	1	| nxp:NX_P04083-1
M(+15.994900)LTELEKALNSIIDVYHK	62	2133.13	1	| nxp:NX_P05109-1
CSMDDSAGPR	62	1095.42	1	| nxp:NX_P07988-1
ELGICPDDAAVIPIK	62	1610.85	1	| nxp:NX_P12273-1
KSQPMGLWR	62	1102.58	1	| nxp:NX_P25311-1
TETQEKNPLPSK	62	1371.71	1	| nxp:NX_P62328-1
SLEACTCTYEDR	62	1504.6	1	| nxp:NX_Q9HC84-1
NLDLDSIIAEVK	61	1329.73	11	| contaminant_KERATIN21 | nxp:NX_Q5XKE5-1 | nxp:NX_O95678-1 | contaminant_KERATIN18 | nxp:NX_P02538-1 | nxp:NX_P48668-1 | nxp:NX_P04259-1 | contaminant_KERATIN17 | nxp:NX_P13647-1 | nxp:NX_P35908-1 | contaminant_KERATIN22
VEVLYQGSWGTVCDDSWDTNDANVVCR	61	3145.36	7	| nxp:NX_Q9UGM3-8 | nxp:NX_Q9UGM3-2 | nxp:NX_Q9UGM3-5 | nxp:NX_Q9UGM3-3 | nxp:NX_Q9UGM3-1 | nxp:NX_Q9UGM3-7 | nxp:NX_Q9UGM3-6
GLEWVGR	61	816.436	3	| nxp:NX_A0A0B4J1Y9-1 | nxp:NX_A0A0B4J1V0-1 | nxp:NX_A0A0B4J1V6-1
LLIYGASTR	61	993.573	3	| nxp:NX_P01624-1 | nxp:NX_A0A075B6H7-1 | nxp:NX_A0A0C4DH55-1
EIQNAVNGVK	61	1071.58	3	| nxp:NX_P10909-6 | nxp:NX_P10909-5 | nxp:NX_P10909-2
LGM(+15.994900)FNIQHCK	61	1263.6	2	| nxp:NX_P01009-2 | nxp:NX_P01009-1
CTSTGWIPAPR	61	1245.6	2	| nxp:NX_P08603-2 | nxp:NX_P08603-1
AENRADAVTLDGGFIYEAGLAPYK	61	2541.26	1	| nxp:NX_P02788-1
KCLDPVDTPNPTR	61	1512.75	1	| nxp:NX_P03973-1
DSLLQDGEFSMDLR	61	1625.75	1	| nxp:NX_P07737-1
QLSLPETGELDSATLK	61	1701.89	1	| nxp:NX_P14780-1
YSGSEGSTQTLTK	61	1358.64	1	| nxp:NX_P25815-1
AMAAEAEASR	61	1006.46	1	| nxp:NX_P27105-1
SVVGDVLEFGNSWK	61	1536.77	1	| nxp:NX_P98088-1
KQCPCDHFKGNVK	61	1617.76	1	| nxp:NX_Q6UXB2-1
LYDLHGDCSYVLSK	61	1669.79	1	| nxp:NX_Q9HC84-1
GPGGDPPYK	61	887.426	1	| nxp:NX_Q9HC84-1
MNSFVNDIFER	60	1371.64	14	| nxp:NX_Q99879-1 | nxp:NX_Q99880-1 | nxp:NX_Q16778-1 | nxp:NX_P33778-1 | nxp:NX_P23527-1 | nxp:NX_O60814-1 | nxp:NX_P58876-1 | nxp:NX_P57053-1 | nxp:NX_Q93079-1 | nxp:NX_P06899-1 | nxp:NX_Q8N257-1 | nxp:NX_P62807-1 | nxp:NX_Q99877-1 | nxp:NX_Q5QNW6-2
LFPPSSEELQANK	60	1459.74	7	| nxp:NX_A0M8Q6-1 | nxp:NX_P0DOY2-1 | nxp:NX_P0DOY3-1 | nxp:NX_P0CF74-1 | contaminant_I141_HUMAN | nxp:NX_B9A064-1 | contaminant_NRL_1MCOL
VMPICLPSK	60	1044.56	4	| nxp:NX_P00738-2 | nxp:NX_P00739-1 | nxp:NX_P00739-2 | nxp:NX_P00738-1
TLIEKTNEER	60	1232.65	3	| nxp:NX_P10909-6 | nxp:NX_P10909-5 | nxp:NX_P10909-2
ALENDPDCR	60	1089.46	3	| nxp:NX_P13797-2 | nxp:NX_P13796-1 | nxp:NX_P13797-1
QGARGGCITLISSEGYVSSK	60	2070.03	2	| contaminant_PIGR_HUMAN | nxp:NX_P01833-1
ESGPTTYK	60	882.42	2	| nxp:NX_P01871-1 | nxp:NX_P01871-2
M(+15.994900)LEEIM(+15.994900)KYEASILTHDSSIR	60	2398.16	2	| nxp:NX_P02679-2 | nxp:NX_P02679-1
ESEPQAAAEPAEAK	60	1427.66	2	| nxp:NX_P80723-2 | nxp:NX_P80723-1
TTIEKPVWLGFLGPIIK	60	1912.13	1	| nxp:NX_P00450-1
EYTDASFTNRK	60	1331.62	1	| nxp:NX_P00450-1
YYWGGQYTWDMAK	60	1668.72	1	| nxp:NX_P02675-1
DELRDEGKASSAK	60	1405.69	1	| nxp:NX_P02768-1
RESTVFEDLSDEAERDEYELLCPDNTR	60	3288.46	1	| nxp:NX_P02788-1
SYEPLEDPGVK	60	1233.6	1	| nxp:NX_P37837-1
VFERCELAR	60	1179.59	1	| nxp:NX_P61626-1
SHPEVSIEHLGQVVQCSR	60	2062.01	1	| nxp:NX_P98088-1
GPDFCPQK	60	948.424	1	| nxp:NX_P98088-1
ASHEEVEGLVEK	60	1326.65	1	| nxp:NX_Q08380-1
VAYDLVYYVR	60	1260.66	1	| nxp:NX_Q9Y6R7-1
KIIAPPERK	59	1051.66	8	| nxp:NX_P63267-2 | nxp:NX_P60709-1 | nxp:NX_P63261-1 | nxp:NX_Q562R1-1 | nxp:NX_P63267-1 | nxp:NX_P62736-1 | nxp:NX_P68133-1 | nxp:NX_P68032-1
DLTDYLM(+15.994900)K	59	1014.48	8	| nxp:NX_P63267-2 | nxp:NX_P60709-1 | nxp:NX_P63261-1 | nxp:NX_Q562R1-1 | nxp:NX_P63267-1 | nxp:NX_P62736-1 | nxp:NX_P68133-1 | nxp:NX_P68032-1
TINEVENQILTR	59	1429.76	7	| nxp:NX_O43707-3 | nxp:NX_O43707-2 | nxp:NX_P12814-2 | nxp:NX_P12814-1 | nxp:NX_O43707-1 | nxp:NX_P12814-3 | nxp:NX_P12814-4
LLVVYPWTQRF	59	1421.79	5	| nxp:NX_P02100-1 | nxp:NX_P69892-1 | nxp:NX_P69891-1 | nxp:NX_P02042-1 | nxp:NX_P68871-1
GTLVQTK	59	746.441	5	| nxp:NX_P16403-1 | nxp:NX_Q02539-1 | nxp:NX_P10412-1 | nxp:NX_P16402-1 | nxp:NX_P16401-1
FLEDVKK	59	878.498	2	| nxp:NX_P01009-2 | nxp:NX_P01009-1
ASTPNGYDNGIIWATWK	59	1893.91	2	| nxp:NX_P02679-2 | nxp:NX_P02679-1
TLYSSSPR	59	910.463	2	| nxp:NX_P05155-1 | nxp:NX_P05155-3
DGDRFWWENEGVFSM(+15.994900)QQR	59	2302.99	2	| nxp:NX_P05164-1 | nxp:NX_P05164-3
VHQYFNVELIQPGAVK	59	1841.99	1	| nxp:NX_P01024-1
AQM(+15.994900)TEDAVDAER	59	1351.58	1	| nxp:NX_P01024-1
TPEVTCVVVDVSHEDPEVQFK	59	2414.15	1	| nxp:NX_P01860-1
YGPPCPSCPAPEFLGGPSVFLFPPKPK	59	2943.46	1	| nxp:NX_P01861-1
DEPPQSPWDR	59	1226.54	1	| nxp:NX_P02647-1
SM(+15.994900)GGKEDLIWELLNQAQEHFGK	59	2546.23	1	| nxp:NX_P02787-1
SCVPGADKGQFPNLCR	59	1805.84	1	| nxp:NX_P02788-1
TGESVEFVCK	59	1155.54	1	| nxp:NX_P08603-1
LEGEACGVYTPR	59	1351.63	1	| nxp:NX_P18065-1
SDVM(+15.994900)YTDWKK	59	1288.59	1	| nxp:NX_P19652-1
GTFATLSELHCDK	59	1478.69	1	| nxp:NX_P68871-1
SIILEYHQDR	59	1273.65	1	| nxp:NX_P98088-1
KTGCCYSCEEDSCQVR	59	2038.77	1	| nxp:NX_Q9HC84-1
GTGASGSFKLNK	58	1166.62	5	| nxp:NX_P16403-1 | nxp:NX_Q02539-1 | nxp:NX_P10412-1 | nxp:NX_P16402-1 | nxp:NX_P16401-1
TITLEVEPSDTIENVK	58	1787.93	4	| nxp:NX_P62987-1 | nxp:NX_P62979-1 | nxp:NX_P0CG47-1 | nxp:NX_P0CG48-1
CCAAADPHECYAKVFDEFKPLVEEPQNLIK	58	3578.68	3	| nxp:NX_P02768-3 | nxp:NX_P02768-2 | nxp:NX_P02768-1
YIETDPANR	58	1078.52	3	| nxp:NX_P06396-4 | nxp:NX_P06396-3 | nxp:NX_P06396-1
SKAEAESLYQSKYEELQITAGR	58	2501.25	2	| contaminant_KERATIN13 | nxp:NX_P04264-1
HCALGPEVANVAK	58	1365.69	2	| contaminant_PIGR_HUMAN | nxp:NX_P01833-1
TEGDGVYTLNNEKQWINK	58	2109.02	2	| nxp:NX_P00738-2 | nxp:NX_P00738-1
YVTSAPMPEPQAPGR	58	1600.78	2	| nxp:NX_P01871-1 | nxp:NX_P01871-2
VHLTPEEK	58	952.51	2	| nxp:NX_P02042-1 | nxp:NX_P68871-1
IANVFTNAFR	58	1152.62	2	| nxp:NX_P05164-1 | nxp:NX_P05164-3
QSLEASLAETEGR	58	1390.68	2	| nxp:NX_P13645-1 | contaminant_KERATIN03
LSINTHPSQKPLSITVR	58	1891.08	1	| nxp:NX_P01024-1
TFISPIK	58	805.482	1	| nxp:NX_P01024-1
TQPNLDNCPFHDQPHLKR	58	2217.06	1	| nxp:NX_P01034-1
KGETFSCMVGHEALPLAFTQK	58	2351.15	1	| nxp:NX_P01877-1
NGKEDAIWNLLR	58	1428.76	1	| nxp:NX_P02788-1
RVDTVDPPYPR	58	1314.68	1	| nxp:NX_P04004-1
NIETIINTFHQY	58	1492.74	1	| nxp:NX_P06702-1
SPTGEWLPR	58	1042.53	1	| nxp:NX_P07988-1
APEPLELTLPVELLADTR	58	1977.09	1	| nxp:NX_Q8N4F0-1
AAQLPDM(+15.994900)PLEELGQQVDCDR	58	2301.05	1	| nxp:NX_Q9HC84-1
GRVEVLYR	57	991.568	9	| nxp:NX_Q9UGM3-9 | nxp:NX_Q9UGM3-4 | nxp:NX_Q9UGM3-8 | nxp:NX_Q9UGM3-2 | nxp:NX_Q9UGM3-5 | nxp:NX_Q9UGM3-3 | nxp:NX_Q9UGM3-1 | nxp:NX_Q9UGM3-7 | nxp:NX_Q9UGM3-6
DESGPSIVHRK	57	1224.63	7	| nxp:NX_Q9BYX7-1 | nxp:NX_P60709-1 | nxp:NX_P63261-1 | nxp:NX_P0CG39-1 | nxp:NX_P0CG38-1 | nxp:NX_Q6S8J3-1 | nxp:NX_A5A3E0-1
HQGVM(+15.994900)VGM(+15.994900)GQKDSYVGDEAQSKR	57	2539.17	6	| nxp:NX_P60709-1 | nxp:NX_P63261-1 | nxp:NX_P63267-1 | nxp:NX_P62736-1 | nxp:NX_P68133-1 | nxp:NX_P68032-1
WQQGNVFSCSVMHEALHNHYTQK	57	2801.27	3	| nxp:NX_P01859-1 | nxp:NX_P01857-1 | contaminant_NRL_1MCOH
KLVAASQAALGL	57	1141.69	3	| nxp:NX_P02768-3 | nxp:NX_P02768-2 | nxp:NX_P02768-1
DGGFCEVCK	57	1071.42	3	| nxp:NX_P07602-1 | nxp:NX_P07602-2 | nxp:NX_P07602-3
M(+15.994900)TLDDFR	57	913.408	2	| contaminant_KERATIN02 | nxp:NX_P35527-1
FTCTVTHTDLPSPLK	57	1716.86	2	| nxp:NX_P01871-1 | nxp:NX_P01871-2
CYCRIPACIAGER	57	1625.73	2	| nxp:NX_P59666-1 | nxp:NX_P59665-1
RVAPEEHPVLLTEAPLNPK	57	2110.17	2	| nxp:NX_P60709-1 | nxp:NX_P63261-1
ACEVTHQGLSSPVTK	57	1613.8	1	| nxp:NX_P01834-1
EEAPSLRPAPPPISGGGYR	57	1951	1	| nxp:NX_P02675-1
TVAACNLPIVR	57	1213.67	1	| nxp:NX_P02760-1
THLPEVFLSK	57	1170.65	1	| nxp:NX_P02774-3
DLLFRDDTVCLAK	57	1565.8	1	| nxp:NX_P02787-1
LLQDEFPGIPSPLDAAVECHR	57	2364.17	1	| nxp:NX_P02790-1
MLNPPNFCEM(+15.994900)DGQCKR	57	2012.84	1	| nxp:NX_P03973-1
KPECQSDWQCPGKK	57	1747.79	1	| nxp:NX_P03973-1
GNFHAVYR	57	963.48	1	| nxp:NX_P05109-1
GNPTVEVDLFTSK	57	1406.72	1	| nxp:NX_P06733-1
TFVNITPAEVGVLVGK	57	1643.94	1	| nxp:NX_P07737-1
SNSSMHITDCR	57	1307.55	1	| nxp:NX_P07998-1
AQFVNWIDSIIQR	57	1589.84	1	| nxp:NX_P08246-1
EAFSLFDKDGDGTITTK	57	1844.89	1	| nxp:NX_P0DP23-1
VIETLLM(+15.994900)DTPSSYEAAMELFSPDQDM(+15.994900)R	57	3121.41	1	| nxp:NX_P11684-1
YPVVPVHLDTTI	57	1353.74	1	| nxp:NX_P12724-1
AESHPEVSIEHLGQVVQCSREEGLVCR	57	3105.48	1	| nxp:NX_P98088-1
GPQQRPPKPGGHHR	57	1548.83	1	| nxp:NX_Q16378-1
FPGLCNYVFSEHCR	57	1785.78	1	| nxp:NX_Q9HC84-1
AISSIGLECQSVTSR	57	1607.81	1	| nxp:NX_Q9HD89-1
NLLSVAYK	56	907.525	8	| nxp:NX_P31947-2 | nxp:NX_P27348-1 | nxp:NX_P63104-1 | nxp:NX_P31946-1 | nxp:NX_P31947-1 | nxp:NX_P62258-1 | nxp:NX_Q04917-1 | nxp:NX_P61981-1
PEPAKSAPAPK	56	1092.6	5	| nxp:NX_Q16778-1 | nxp:NX_O60814-1 | nxp:NX_P57053-1 | nxp:NX_P06899-1 | nxp:NX_P62807-1
ADGSPVKAGVETTKPSK	56	1671.89	2	| nxp:NX_B9A064-1 | contaminant_NRL_1MCOL
SEAEIHQSFQHLLR	56	1694.86	2	| nxp:NX_P01011-2 | nxp:NX_P01011-1
CPAPELLGGPSVFLFPPKPK	56	2151.17	2	| nxp:NX_P01857-1 | nxp:NX_P01860-1
TVIGPDGHKEVTK	56	1380.75	2	| nxp:NX_P02671-2 | nxp:NX_P02671-1
NQINALTSFVDASM(+15.994900)VYGSEEPLAR	56	2628.26	2	| nxp:NX_P05164-1 | nxp:NX_P05164-3
SPDVINGSPISQK	56	1341.7	2	| nxp:NX_P08603-2 | nxp:NX_P08603-1
ADSSPVK	56	703.362	2	| nxp:NX_P0DOY2-1 | nxp:NX_P0DOY3-1
FRCPEALFQPSFLGMESCGIHETTFNSIMK	56	3534.63	2	| nxp:NX_P60709-1 | nxp:NX_P63261-1
SDGAPASDSKPGSSEAAPSSK	56	1932.88	2	| nxp:NX_P80723-2 | nxp:NX_P80723-1
QSEDSTFYLGER	56	1431.64	1	| nxp:NX_P00450-1
WEM(+15.994900)PFDPQDTHQSR	56	1789.76	1	| nxp:NX_P01011-1
KQELSEAEQATR	56	1389.7	1	| nxp:NX_P01024-1
FYHPEKEDGKLNK	56	1604.81	1	| nxp:NX_P01024-1
RIPIEDGSGEVVLSR	56	1626.88	1	| nxp:NX_P01024-1
TQPNLDNCPFHDQPHLK	56	2060.96	1	| nxp:NX_P01034-1
TTPPVLDSDGSFFLYSR	56	1901.93	1	| nxp:NX_P01861-1
AFKAWAVAR	56	1019.58	1	| nxp:NX_P02768-1
CPVTYGQCLMLNPPNFCEMDGQCKR	56	3075.31	1	| nxp:NX_P03973-1
QFVTATDVVR	56	1135.61	1	| nxp:NX_P13796-1
VRDPQGIR	56	940.532	1	| nxp:NX_P61626-1
SPADKTNVK	56	959.516	1	| nxp:NX_P69905-1
M(+15.994900)DTSASGPTR	56	1038.45	1	| nxp:NX_Q8TDL5-1
AENYPEVSIDQVGQVLTCSLETGLTCK	56	3011.43	1	| nxp:NX_Q9HC84-1
LEQEIATYR	55	1122.58	16	| nxp:NX_P19012-2 | nxp:NX_Q8N1A0-1 | nxp:NX_P08727-1 | contaminant_KERATIN10 | nxp:NX_P13646-3 | nxp:NX_P35900-1 | nxp:NX_Q04695-1 | contaminant_KERATIN06 | nxp:NX_P19012-1 | nxp:NX_P13646-1 | contaminant_KERATIN04 | contaminant_KERATIN08 | contaminant_KERATIN05 | nxp:NX_P02533-1 | contaminant_KERATIN07 | nxp:NX_P08779-1
ISKQEYDESGPSIVHRK	55	1973.01	7	| nxp:NX_Q9BYX7-1 | nxp:NX_P60709-1 | nxp:NX_P63261-1 | nxp:NX_P0CG39-1 | nxp:NX_P0CG38-1 | nxp:NX_Q6S8J3-1 | nxp:NX_A5A3E0-1
SCQVTHEGSTVEK	55	1461.66	5	| nxp:NX_P0DOY2-1 | nxp:NX_P0DOY3-1 | nxp:NX_P0CF74-1 | nxp:NX_B9A064-1 | contaminant_NRL_1MCOL
EIVLTQSPATLSLSPGER	55	1898.02	3	| nxp:NX_A0A0A0MRZ8-1 | nxp:NX_P04433-1 | nxp:NX_A0A0C4DH25-1
TEGDGVYTLNDKKQWINK	55	2109.06	3	| nxp:NX_P00739-1 | nxp:NX_P00739-2 | nxp:NX_P00738-1
FMETVAEK	55	954.46	3	| nxp:NX_P10909-6 | nxp:NX_P10909-5 | nxp:NX_P10909-2
QINDYVEKGTQGK	55	1479.74	2	| nxp:NX_P01009-2 | nxp:NX_P01009-1
AGLQVYNK	55	892.489	2	| nxp:NX_P13987-1 | nxp:NX_P13987-2
AVVHGILM(+15.994900)GVPVPFPIPEPDGCK	55	2445.27	2	| nxp:NX_P61916-2 | nxp:NX_P61916-1
TWSESGQGVTAR	55	1278.61	1	| nxp:NX_P01876-1
VCPFAGILENGAVR	55	1502.78	1	| nxp:NX_P02749-1
LCM(+15.994900)GSGLNLCEPNNKEGYYGYTGAFR	55	2987.31	1	| nxp:NX_P02787-1
NGSDCPDKFCLFQSETKNLLFNDNTECLAR	55	3593.61	1	| nxp:NX_P02788-1
GDKVWVYPPEKK	55	1445.78	1	| nxp:NX_P02790-1
HQFLLTGDTQGR	55	1372.7	1	| nxp:NX_P04217-1
VIEHIM(+15.994900)EDLDTNADK	55	1758.82	1	| nxp:NX_P06702-1
M(+15.994900)HEGDEGPGHHHKPGLG	55	1807.79	1	| nxp:NX_P06702-1
FFGHGAEDSLADQAANEWGR	55	2177.96	1	| nxp:NX_P0DJI8-1
VIETLLM(+15.994900)DTPSSYEAAMELFSPDQDMREAGAQLK	55	3802.79	1	| nxp:NX_P11684-1
KTETQEKNPLPSK	55	1499.81	1	| nxp:NX_P62328-1
KGHFDTLSKGELK	55	1459.79	1	| nxp:NX_P80511-1
SHPEVSIEHLGQVVQCSREEGLVCR	55	2905.4	1	| nxp:NX_P98088-1
TQAACPNIR	55	1030.51	1	| nxp:NX_P98088-1
IYTSPTWSAFVTDSSWSAR	55	2162.02	1	| nxp:NX_Q08380-1
KFCYDVSSCR	55	1321.57	1	| nxp:NX_Q6P5S2-1
AGALNLDITGQLR	55	1341.75	1	| nxp:NX_Q8N4F0-1
CADSSFTVLAELRK	55	1596.81	1	| nxp:NX_Q9HC84-1
VTIAQGGVLPNIQAVLLPK	54	1931.17	12	| nxp:NX_Q99878-1 | nxp:NX_Q16777-1 | nxp:NX_Q9BTM1-1 | nxp:NX_P0C0S8-1 | nxp:NX_P04908-1 | nxp:NX_Q93077-1 | nxp:NX_P20671-1 | nxp:NX_Q7L7L0-1 | nxp:NX_Q8IUE6-1 | nxp:NX_Q6FI13-1 | nxp:NX_Q96QV6-1 | nxp:NX_P16104-1
VTISVDTSK	54	949.52	7	| nxp:NX_P01825-1 | nxp:NX_P0DP08-1 | nxp:NX_P0DP06-1 | nxp:NX_P0DP07-1 | nxp:NX_A0A0C4DH41-1 | nxp:NX_P06331-1 | nxp:NX_P01824-1
YVDGVEVHNAK	54	1230.61	4	| nxp:NX_P01859-1 | nxp:NX_P01861-1 | nxp:NX_P01857-1 | nxp:NX_P01860-1
KTLLSNLEEAK	54	1245.7	3	| nxp:NX_P10909-6 | nxp:NX_P10909-5 | nxp:NX_P10909-2
LGMFNIQHCK	54	1247.6	2	| nxp:NX_P01009-2 | nxp:NX_P01009-1
LVDKFLEDVKK	54	1333.77	2	| nxp:NX_P01009-2 | nxp:NX_P01009-1
M(+15.994900)ADEAGSEADHEGTHSTK	54	1888.76	2	| nxp:NX_P02671-2 | nxp:NX_P02671-1
LKNSLFEYQK	54	1269.68	2	| nxp:NX_P02671-2 | nxp:NX_P02671-1
LVTDLTKVHTECCHGDLLECADDRADLAK	54	3355.57	2	| nxp:NX_P02768-2 | nxp:NX_P02768-1
AFHDNEETFLKK	54	1478.73	2	| nxp:NX_P02768-3 | nxp:NX_P02768-1
CTAFHDNEETFLKK	54	1739.81	2	| nxp:NX_P02768-3 | nxp:NX_P02768-1
DYLPLVLGPTAMR	54	1445.78	2	| nxp:NX_P05164-1 | nxp:NX_P05164-3
VFLDCCNYITELR	54	1702.79	1	| nxp:NX_P01024-1
VYTDWKK	54	939.493	1	| nxp:NX_P02763-1
FQLFGSPSGQKDLLF	54	1683.87	1	| nxp:NX_P02788-1
TPSCGDICNFPPK	54	1492.66	1	| nxp:NX_P04003-1
LETECPQYIR	54	1308.63	1	| nxp:NX_P05109-1
EAIFQDTMR	54	1110.52	1	| nxp:NX_P07988-1
RLGNGVQCLAMGWGLLGR	54	1958.02	1	| nxp:NX_P08246-1
AECMLQQAER	54	1235.55	1	| nxp:NX_P13796-1
SYSACTTDGR	54	1117.46	1	| nxp:NX_P14780-1
NAEENLIYDYHLIDKLENK	54	2334.16	1	| nxp:NX_P20061-1
RGGICNGDGGTPLVCEGLAHGVASFSLGPCGRGPDFFTR	54	4048.9	1	| nxp:NX_P20160-1
IDVHWTR	54	926.484	1	| nxp:NX_P25311-1
LSPQTLTTIVK	54	1200.72	1	| nxp:NX_P28676-1
TETQEKNPLPSKETIEQEK	54	2229.12	1	| nxp:NX_P62328-1
GHFDTLSKGELK	54	1331.7	1	| nxp:NX_P80511-1
AAFGQGSGPIMLDEVQCTGTEASLADCK	54	2913.31	1	| nxp:NX_Q08380-1
M(+15.994900)CWAPK	54	808.348	1	| nxp:NX_Q9HC84-1
NDEELNKLLGK	53	1272.68	7	| nxp:NX_Q99878-1 | nxp:NX_Q16777-1 | nxp:NX_Q9BTM1-1 | nxp:NX_P0C0S8-1 | nxp:NX_P20671-1 | nxp:NX_Q6FI13-1 | nxp:NX_Q9BTM1-2
AAVPSGASTGIYEALELR	53	1804.94	6	| nxp:NX_P13929-3 | nxp:NX_P09104-2 | nxp:NX_P13929-2 | nxp:NX_P09104-1 | nxp:NX_P13929-1 | nxp:NX_P06733-1
WQQGNVFSCSVM(+15.994900)HEALHNHYTQK	53	2817.26	3	| nxp:NX_P01859-1 | nxp:NX_P01857-1 | contaminant_NRL_1MCOH
ATKEQLKAVM(+15.994900)DDFAAFVEK	53	2157.09	3	| nxp:NX_P02768-3 | nxp:NX_P02768-2 | nxp:NX_P02768-1
FSSYEK	53	760.351	2	| contaminant_PIGR_HUMAN | nxp:NX_P01833-1
LLIYDASNR	53	1064.57	2	| nxp:NX_A0A0A0MRZ8-1 | nxp:NX_P04433-1
SHCIAEVENDEM(+15.994900)PADLPSLAADFV	53	2646.17	2	| nxp:NX_P02768-2 | nxp:NX_P02768-1
AVSNEIVR	53	887.495	2	| nxp:NX_P05164-1 | nxp:NX_P05164-3
FEHCNFNDVTTR	53	1539.66	2	| nxp:NX_P13987-1 | nxp:NX_P13987-2
EGVQKEDIPPADLSDQVPDTESETR	53	2755.29	1	| nxp:NX_P01024-1
VYAYYNLEESCTR	53	1667.74	1	| nxp:NX_P01024-1
CLDPVDTPNPTRR	53	1540.75	1	| nxp:NX_P03973-1
CTEGFNVDKK	53	1197.56	1	| nxp:NX_P04004-1
DSPSVWAAVPGK	53	1213.62	1	| nxp:NX_P07737-1
TTSSLACAQGPEFWCQSLEQALQCR	53	2928.31	1	| nxp:NX_P07988-1
GAGTNEDALIEILTTR	53	1673.87	1	| nxp:NX_P12429-1
SDTSGDYEITLLK	53	1441.71	1	| nxp:NX_P12429-1
VLVDNYFCGAEDGLSCPR	53	2071.92	1	| nxp:NX_P98088-1
ALAAAGYDVEKNNSR	52	1578.79	5	| nxp:NX_P22492-1 | nxp:NX_P16403-1 | nxp:NX_Q02539-1 | nxp:NX_P10412-1 | nxp:NX_P16402-1
DETYVPK	52	851.414	4	| nxp:NX_P02768-3 | nxp:NX_P02768-2 | contaminant_INT-STD1 | nxp:NX_P02768-1
RPHFFFPK	52	1075.58	3	| nxp:NX_P10909-6 | nxp:NX_P10909-5 | nxp:NX_P10909-2
KTLLSNLEEAKK	52	1373.8	3	| nxp:NX_P10909-6 | nxp:NX_P10909-5 | nxp:NX_P10909-2
HGVQELEIELQSQLSKK	52	1966.06	2	| contaminant_KERATIN02 | nxp:NX_P35527-1
CYYPPTSVNR	52	1256.57	2	| contaminant_PIGR_HUMAN | nxp:NX_P01833-1
HYEGSTVPEKKTPK	52	1600.83	2	| nxp:NX_P00738-2 | nxp:NX_P00738-1
AFAQYLQQCPFEDHVK	52	1980.93	2	| nxp:NX_P02768-3 | nxp:NX_P02768-1
TAQEGDHGSHVYTK	52	1529.7	1	| nxp:NX_P01023-1
CTEEGKWSPELPVCAPIICPPPSIPTFATLR	52	3523.74	1	| nxp:NX_P02749-1
CQSFRDHMK	52	1208.53	1	| nxp:NX_P02787-1
HLAM(+15.994900)APNHAVVSR	52	1418.73	1	| nxp:NX_P02788-1
RGEVPPRYPR	52	1226.68	1	| nxp:NX_P02790-1
DLKCCMGMCGK	52	1359.53	1	| nxp:NX_P03973-1
GVDEATIIDILTK	52	1387.77	1	| nxp:NX_P04083-1
LISWYDNEFGYSNR	52	1763.8	1	| nxp:NX_P04406-1
FQTFEGDLK	52	1084.53	1	| nxp:NX_P14780-1
AVIDDAFAR	52	977.505	1	| nxp:NX_P14780-1
RKATGPPVSELITK	52	1496.88	1	| nxp:NX_P16401-1
NMACYCR	52	974.364	1	| nxp:NX_P59665-1
AESHPEVNIEHLGQVVQCSR	52	2289.1	1	| nxp:NX_P98088-1
AVDTWSWGER	52	1206.55	1	| nxp:NX_Q08380-1
SDCATSHGSLR	52	1190.52	1	| nxp:NX_Q8TDL5-1
QLGCGWAM(+15.994900)LAPGNAR	51	1617.76	5	| nxp:NX_Q9UGM3-5 | nxp:NX_Q9UGM3-3 | nxp:NX_Q9UGM3-1 | nxp:NX_Q9UGM3-7 | nxp:NX_Q9UGM3-6
YTKKVPQVSTPTLVEVSR	51	2032.14	3	| nxp:NX_P02768-3 | nxp:NX_P02768-2 | nxp:NX_P02768-1
QTQVSVLPEGGETPLFK	51	1829.96	3	| nxp:NX_P06396-4 | nxp:NX_P06396-3 | nxp:NX_P06396-1
VSCVTPNF	51	923.429	3	| nxp:NX_Q14508-2 | nxp:NX_Q14508-3 | nxp:NX_Q14508-1
KYLYEIAR	51	1055.59	2	| contaminant_INT-STD1 | nxp:NX_P02768-1
IKGEHPGLSIGDVAK	51	1520.84	2	| nxp:NX_B2RPK0-1 | nxp:NX_P09429-1
TYTCNVDHKPSNTK	51	1664.77	2	| nxp:NX_P01859-1 | nxp:NX_P01861-1
DGFFGNPR	51	909.421	2	| nxp:NX_P01871-1 | nxp:NX_P01871-2
HPDYSVVLLLR	51	1311.74	2	| nxp:NX_P02768-2 | nxp:NX_P02768-1
QLEEAEEEAQR	51	1331.61	2	| nxp:NX_P35579-2 | nxp:NX_P35579-1
GALSLQGSIM(+15.994900)TVGEK	51	1506.78	2	| nxp:NX_Q8IWL1-1 | nxp:NX_Q8IWL2-2
AAVAAVLSPEEFM(+15.994900)VLLDSVLPESAHR	51	2767.43	2	| nxp:NX_Q8TDL5-2 | nxp:NX_Q8TDL5-1
TLCSMEEAINER	51	1452.65	2	| nxp:NX_Q9HD89-2 | nxp:NX_Q9HD89-1
VLLDGVQNPR	51	1110.63	1	| nxp:NX_P01024-1
SLTWNSVK	51	934.499	1	| nxp:NX_P02788-1
IGEHTPSALAIMENANVLAR	51	2107.1	1	| nxp:NX_P04075-2
AQEGLRPGTLCTV	51	1401.72	1	| nxp:NX_P08311-1
TIQNDIMLLQLSR	51	1544.85	1	| nxp:NX_P08311-1
VIETLLM(+15.994900)DTPSSYEAAMELFSPDQDM(+15.994900)REAGAQLKK	51	3946.88	1	| nxp:NX_P11684-1
VVSVLTVLHQDWLNGKEYK	50	2228.21	3	| nxp:NX_P01861-1 | nxp:NX_P01857-1 | nxp:NX_P01860-1
TNAENEFVTIKK	50	1393.73	2	| contaminant_KERATIN13 | nxp:NX_P04264-1
QSSGENCDVVVNTLGKR	50	1862.9	2	| contaminant_PIGR_HUMAN | nxp:NX_P01833-1
CPLLVDSEGWVK	50	1402.7	2	| contaminant_PIGR_HUMAN | nxp:NX_P01833-1
EKYLTWASR	50	1153.6	2	| nxp:NX_P01877-1 | nxp:NX_P01876-1
LAKTYETTLEK	50	1296.7	2	| nxp:NX_P02768-2 | nxp:NX_P02768-1
YQPMEPNPR	50	1131.53	2	| nxp:NX_P05164-1 | nxp:NX_P05164-3
AGVETTTPSKQSNNK	50	1561.78	2	| nxp:NX_P0DOY2-1 | nxp:NX_P0DOY3-1
SQYEQLAEQNRK	50	1493.73	2	| nxp:NX_P13645-1 | contaminant_KERATIN03
SDDTAVYYCAR	50	1320.55	2	| nxp:NX_P23083-1 | nxp:NX_A0A0C4DH31-1
KTEAPAAPAAQETK	50	1412.74	2	| nxp:NX_P80723-2 | nxp:NX_P80723-1
LSPSCPDALAPKDPCTANPFR	50	2314.1	2	| nxp:NX_P98088-1 | nxp:NX_Q9HC84-1
GVYSSDVFDIFPGTYQTLEMFPR	50	2669.26	1	| nxp:NX_P00450-1
LLIYDASNLETGVPSR	50	1747.92	1	| nxp:NX_P01594-1
DCQVFR	50	824.372	1	| nxp:NX_P02750-1
TYMLAFDVNDEKNWGLSVYADKPETTK	50	3135.5	1	| nxp:NX_P02763-1
RHPYFYAPELLF	50	1552.79	1	| nxp:NX_P02768-1
SGAQATWTELPWPHEK	50	1837.89	1	| nxp:NX_P02790-1
RLTWASHEK	50	1127.6	1	| nxp:NX_P06702-1
LGDLYEEEMR	50	1254.57	1	| nxp:NX_P08670-1
CGVPDLGR	50	873.425	1	| nxp:NX_P14780-1
KLQATVQELQK	50	1285.75	1	| nxp:NX_P31146-1
NM(+15.994900)DCYCRIPACIAGERR	50	2157.94	1	| nxp:NX_P59666-1
ALLQDNIADAVACAK	50	1572.81	1	| nxp:NX_P61626-1
RDPQGIR	50	841.464	1	| nxp:NX_P61626-1
LGMDGYRGI	50	981.482	1	| nxp:NX_P61626-1
DVSQEESPSVISGKPEGR	50	1900.92	1	| nxp:NX_Q04118-1
SFEDRYDYYSK	50	1472.63	1	| nxp:NX_Q6P5S2-1
FNM(+15.994900)CFNYNVR	50	1380.58	1	| nxp:NX_Q9HC84-1
SGHCLVDLPGLEGCYPK	50	1901.89	1	| nxp:NX_Q9HC84-1
SLAAYTAACQAAGVAVKPWR	50	2091.08	1	| nxp:NX_Q9Y6R7-1
SKQEYDESGPSIVHRK	49	1859.92	7	| nxp:NX_Q9BYX7-1 | nxp:NX_P60709-1 | nxp:NX_P63261-1 | nxp:NX_P0CG39-1 | nxp:NX_P0CG38-1 | nxp:NX_Q6S8J3-1 | nxp:NX_A5A3E0-1
SYSCQVTHEGSTVEKTVAPTECS	49	2557.12	4	| nxp:NX_P0DOY2-1 | nxp:NX_P0DOY3-1 | nxp:NX_B9A064-1 | contaminant_NRL_1MCOL
ITCSGDALPK	49	1061.53	2	| nxp:NX_P01717-1 | nxp:NX_A0A075B6K4-1
QSGLYFIKPLK	49	1293.76	2	| nxp:NX_P02679-2 | nxp:NX_P02679-1
ACEPGVDYVYK	49	1300.59	1	| nxp:NX_P01024-1
ITCQGDSLR	49	1049.5	1	| nxp:NX_P01714-1
SKEFQLFSSPHGK	49	1491.76	1	| nxp:NX_P02787-1
PNHAVVSR	49	879.48	1	| nxp:NX_P02788-1
CPVTYGQCLM(+15.994900)LNPPNFCEM(+15.994900)DGQCKR	49	3107.3	1	| nxp:NX_P03973-1
FLEQECNVLPLK	49	1489.77	1	| nxp:NX_P07988-1
AQEGLRPGTLCTVAGWGR	49	1928.98	1	| nxp:NX_P08311-1
TYWELLSGGEPLSQGAGSYVVR	49	2369.18	1	| nxp:NX_P20061-1
CNDGKTPGAVNACHLSCSALLQDNIADAVACAK	49	3501.6	1	| nxp:NX_P61626-1
KWESGYNTR	49	1140.54	1	| nxp:NX_P61626-1
KTVTAM(+15.994900)DVVYALKR	49	1610.89	1	| nxp:NX_P62805-1
SIYGEKFEDENFILK	49	1831.91	1	| nxp:NX_P62937-1
VKEGMNIVEAMER	49	1505.75	1	| nxp:NX_P62937-1
SLIIQQQGCSSSEPVR	49	1788.89	1	| nxp:NX_P98088-1
IIPGFMCQGGDFTR	48	1598.75	6	| nxp:NX_A0A0B4J2A2-1 | nxp:NX_F5H284-1 | nxp:NX_Q9Y536-1 | nxp:NX_A0A075B767-1 | nxp:NX_A0A075B759-1 | nxp:NX_P62937-1
YVM(+15.994900)LPVADQDQCIRHYEGSTVPEKK	48	2979.43	2	| nxp:NX_P00738-2 | nxp:NX_P00738-1
EQLSLLDRFTEDAKR	48	1820.95	2	| nxp:NX_P01011-2 | nxp:NX_P01011-1
QQCPFEDHVK	48	1287.58	2	| nxp:NX_P02768-3 | nxp:NX_P02768-1
YLPTYR	48	812.43	2	| nxp:NX_P05164-1 | nxp:NX_P05164-3
SMEAEMIQLQEELAAAER	48	2048.96	2	| nxp:NX_P35579-2 | nxp:NX_P35579-1
LKSSIGLINEK	48	1201.72	2	| nxp:NX_Q8TDL5-2 | nxp:NX_Q8TDL5-1
CPFPSRPDNGFVNYPAKPTLYYK	48	2731.33	1	| nxp:NX_P02749-1
NLREGTCPEAPTDECKPVK	48	2201.03	1	| nxp:NX_P02787-1
VPPRIDSGLYLGSGYFTAIQNLRK	48	2665.45	1	| nxp:NX_P02788-1
SGAQATWTELPWPHEKVDGALCMEK	48	2841.33	1	| nxp:NX_P02790-1
DVWGIEGPIDAAFTR	48	1646.82	1	| nxp:NX_P04004-1
ATWSGAVLAGR	48	1088.58	1	| nxp:NX_P04217-1
STGGAPTFNVTVTK	48	1379.72	1	| nxp:NX_P07737-1
KVESLQEEIAFLKK	48	1661.95	1	| nxp:NX_P08670-1
IGNFSTDIKDSK	48	1324.67	1	| nxp:NX_P13796-1
ATGPPVSELITK	48	1212.68	1	| nxp:NX_P16401-1
NSFEDPCSLSVENEK	48	1754.75	1	| nxp:NX_P98088-1
IQLMNSGIGWFQPDVLK	48	1946.02	1	| nxp:NX_Q8TDL5-1
FKMCFNYEIR	48	1407.65	1	| nxp:NX_Q9HC84-1
MCWAPK	48	792.353	1	| nxp:NX_Q9HC84-1
INLGFSNLK	47	1005.57	9	| nxp:NX_Q9UGM3-9 | nxp:NX_Q9UGM3-4 | nxp:NX_Q9UGM3-8 | nxp:NX_Q9UGM3-2 | nxp:NX_Q9UGM3-5 | nxp:NX_Q9UGM3-3 | nxp:NX_Q9UGM3-1 | nxp:NX_Q9UGM3-7 | nxp:NX_Q9UGM3-6
TLLSNLEEAKK	47	1245.7	3	| nxp:NX_P10909-6 | nxp:NX_P10909-5 | nxp:NX_P10909-2
ALGQNPTNAEVLK	47	1354.73	3	| nxp:NX_P60660-2 | nxp:NX_P60660-1 | nxp:NX_P14649-1
ADAAPDEKVLDSGFREIENK	47	2204.08	2	| contaminant_PIGR_HUMAN | nxp:NX_P01833-1
IHLISTQSAIPY	47	1342.74	2	| nxp:NX_P02679-2 | nxp:NX_P02679-1
VSDATGQMNLTK	47	1264.62	2	| nxp:NX_P40121-2 | nxp:NX_P40121-1
YNTYAYVGLTEGPSPGDFR	47	2106.98	2	| nxp:NX_Q8IWL1-1 | nxp:NX_Q8IWL2-2
GLEVTITAR	47	959.552	1	| nxp:NX_P01024-1
SPMYSIITPNILR	47	1504.82	1	| nxp:NX_P01024-1
GTFSQLSELHCDKLHVDPENFR	47	2629.25	1	| nxp:NX_P02042-1
M(+15.994900)GPTELLIEMEDWKGDKVK	47	2235.1	1	| nxp:NX_P02675-1
AGVCPPK	47	728.376	1	| nxp:NX_P03973-1
GDRSEDFGVNEDLADSDAR	47	2067.89	1	| nxp:NX_P04083-1
YNGQVCGGPGR	47	1164.52	1	| nxp:NX_P05107-1
KGADVWFK	47	950.509	1	| nxp:NX_P05109-1
NWIDSIIQR	47	1144.61	1	| nxp:NX_P08246-1
SHKSYSCQVTHEGSTVEK	47	2063.95	1	| nxp:NX_P0DOY3-1
VCNPIITK	47	944.523	1	| nxp:NX_P11142-1
VALFRDWIDGVLNNPGPG	47	1940	1	| nxp:NX_P20160-1
ACYCRIPACIAGER	47	1696.77	1	| nxp:NX_P59665-1
LGMDGYRGISLANWMCLAKWESGYNTR	47	3149.48	1	| nxp:NX_P61626-1
ALQVTVPHFLDWSGEALQPTR	47	2365.23	1	| nxp:NX_Q8N4F0-1
IQYQLVDISQDNALRDEMR	47	2307.14	1	| nxp:NX_Q9H299-1
SPANCPLSCPANSR	47	1530.68	1	| nxp:NX_Q9Y6R7-1
LTEAPLNPK	46	982.557	12	| nxp:NX_P63267-2 | nxp:NX_Q9BYX7-1 | nxp:NX_P60709-1 | nxp:NX_P63261-1 | nxp:NX_Q562R1-1 | nxp:NX_P63267-1 | nxp:NX_P62736-1 | nxp:NX_P68133-1 | nxp:NX_P68032-1 | nxp:NX_P0CG39-1 | nxp:NX_P0CG38-1 | nxp:NX_Q6S8J3-1
CQGRVEILYR	46	1293.67	9	| nxp:NX_Q9UGM3-9 | nxp:NX_Q9UGM3-4 | nxp:NX_Q9UGM3-8 | nxp:NX_Q9UGM3-2 | nxp:NX_Q9UGM3-5 | nxp:NX_Q9UGM3-3 | nxp:NX_Q9UGM3-1 | nxp:NX_Q9UGM3-7 | nxp:NX_Q9UGM3-6
QIFTSSYNR	46	1115.55	9	| nxp:NX_Q9UGM3-9 | nxp:NX_Q9UGM3-4 | nxp:NX_Q9UGM3-8 | nxp:NX_Q9UGM3-2 | nxp:NX_Q9UGM3-5 | nxp:NX_Q9UGM3-3 | nxp:NX_Q9UGM3-1 | nxp:NX_Q9UGM3-7 | nxp:NX_Q9UGM3-6
CDVDIR	46	777.356	4	| nxp:NX_P60709-1 | nxp:NX_P63261-1 | nxp:NX_Q562R1-1 | nxp:NX_O75616-1
EGIPPDQQR	46	1039.52	4	| nxp:NX_P62987-1 | nxp:NX_P62979-1 | nxp:NX_P0CG47-1 | nxp:NX_P0CG48-1
LGQYASPTAKR	46	1191.65	3	| nxp:NX_P0C0L4-2 | nxp:NX_P0C0L4-1 | nxp:NX_P0C0L5-1
SSGSLLNNAIK	46	1103.61	3	| nxp:NX_P20742-2 | nxp:NX_P01023-1 | nxp:NX_P20742-1
STMQELNSR	46	1065.5	2	| contaminant_KERATIN02 | nxp:NX_P35527-1
QVVESAYEVIK	46	1264.68	2	| nxp:NX_P00338-4 | nxp:NX_P00338-3
YCRIPACIAGERR	46	1621.81	2	| nxp:NX_P59666-1 | nxp:NX_P59665-1
DSLEFR	46	766.373	1	| nxp:NX_P01011-1
LGDTTHTCPR	46	1157.54	1	| nxp:NX_P01860-1
VFPLSLCSTQPDGNVVIACLV	46	2289.16	1	| nxp:NX_P01876-1
HGTDDGVVWMNWK	46	1544.7	1	| nxp:NX_P02675-1
DLLLPQPDLR	46	1179.67	1	| nxp:NX_P02750-1
ELSSFIDKGQELCADYSENTFTEYK	46	2974.33	1	| nxp:NX_P02774-3
KCSTSSLLEACTFR	46	1659.78	1	| nxp:NX_P02787-1
APNHAVVSR	46	950.517	1	| nxp:NX_P02788-1
KSEEEVAARR	46	1174.62	1	| nxp:NX_P02788-1
KQVLLHQQAK	46	1192.72	1	| nxp:NX_P02788-1
TYGQCLM(+15.994900)LNPPNFCEM(+15.994900)DGQCKR	46	2751.15	1	| nxp:NX_P03973-1
AAQKADVLTTGAGNPVGDKLNVITVGPR	46	2762.52	1	| nxp:NX_P04040-1
NKLNDLEDALQQAKEDLAR	46	2184.13	1	| nxp:NX_P04264-1
TTEGCLNPR	46	1047.49	1	| nxp:NX_P05107-1
VIEHIMEDLDTNADKQLSFEEFIM(+15.994900)LMAR	46	3354.61	1	| nxp:NX_P06702-1
KFLEQECNVLPLK	46	1617.87	1	| nxp:NX_P07988-1
GNKHPINSEWQTDNCETCTCYETEISCCTLVSTPVGYDKDNCQR	46	5327.22	1	| nxp:NX_P08118-1
RVVLGAHNLSR	46	1221.72	1	| nxp:NX_P08246-1
AAFKGDSGGPLLCNNVAHGIVSYGK	46	2532.27	1	| nxp:NX_P08311-1
SVRPNDEVTAVLAVQTELK	46	2069.12	1	| nxp:NX_P12273-1
AQM(+15.994900)VQEDLEK	46	1206.57	1	| nxp:NX_P26038-1
LQATVQELQK	46	1157.65	1	| nxp:NX_P31146-1
TTQQSPEDCDFKK	46	1583.7	1	| nxp:NX_P49913-1
NACHLSCSALLQDNIADAVACAKR	46	2658.25	1	| nxp:NX_P61626-1
LLQDNIADAVACAK	46	1501.77	1	| nxp:NX_P61626-1
VFLENVIRDAVTYTEHAK	46	2105.1	1	| nxp:NX_P62805-1
DAVTYTEH	46	935.41	1	| nxp:NX_P62805-1
TVTAMDVVYALKR	46	1466.8	1	| nxp:NX_P62805-1
SALSDLHAHK	46	1078.56	1	| nxp:NX_P69905-1
IPGVPWCFKPLQEAECTF	46	2179.04	1	| nxp:NX_Q07654-1
FAPDNEQNILWGLPLQYGWQYR	46	2708.33	1	| nxp:NX_Q6P5S2-1
QVMNLLVPSLPNLVK	46	1664.98	1	| nxp:NX_Q8TDL5-1
PSIVGRPR	45	881.532	11	| nxp:NX_P63267-2 | nxp:NX_Q9BYX7-1 | nxp:NX_P60709-1 | nxp:NX_P63261-1 | nxp:NX_P63267-1 | nxp:NX_P62736-1 | nxp:NX_P68133-1 | nxp:NX_P68032-1 | nxp:NX_P0CG38-1 | nxp:NX_Q6S8J3-1 | nxp:NX_A5A3E0-1
SGGTTMYPGIADR	45	1325.62	7	| nxp:NX_P63267-2 | nxp:NX_P60709-1 | nxp:NX_P63261-1 | nxp:NX_P63267-1 | nxp:NX_P62736-1 | nxp:NX_P68133-1 | nxp:NX_P68032-1
GGQVSVCPLPR	45	1169.61	4	| nxp:NX_P11215-1 | nxp:NX_P11215-2 | nxp:NX_Q13349-1 | nxp:NX_P20702-1
YPIEHGIITNWDDMEK	45	1960.91	4	| nxp:NX_P63267-1 | nxp:NX_P62736-1 | nxp:NX_P68133-1 | nxp:NX_P68032-1
YLYEIARR	45	1083.59	2	| contaminant_INT-STD1 | nxp:NX_P02768-1
SKLVTDLTK	45	1004.6	2	| nxp:NX_P02768-2 | nxp:NX_P02768-1
KYICENQDSISSK	45	1571.74	2	| nxp:NX_P02768-2 | nxp:NX_P02768-1
DVCKNYAEAK	45	1197.56	2	| nxp:NX_P02768-2 | nxp:NX_P02768-1
VGPLLACIIGTQFR	45	1544.86	2	| nxp:NX_P05164-1 | nxp:NX_P05164-3
LLDSQGKVTK	45	1088.63	2	| nxp:NX_Q8TDL5-2 | nxp:NX_Q8TDL5-1
SDDKVTLEER	45	1191.59	1	| nxp:NX_P01024-1
GYTQQLAFR	45	1083.56	1	| nxp:NX_P01024-1
AGDFLEANYMNLQR	45	1641.77	1	| nxp:NX_P01024-1
DLCGCYSVSSVLPGCAQPWNHGETFTCTAAHPELK	45	3949.74	1	| nxp:NX_P01877-1
IRPFFPQQ	45	1032.56	1	| nxp:NX_P02675-1
GPCRAFIQLWAFDAVK	45	1878.97	1	| nxp:NX_P02760-1
AACLLPKLDELRDEGK	45	1827.96	1	| nxp:NX_P02768-1
PPKPEPKPK	45	1017.61	1	| nxp:NX_P05204-1
GDSGGPLLCNNVAHGIVSYGK	45	2115.03	1	| nxp:NX_P08311-1
LSYTCEGGFR	45	1189.53	1	| nxp:NX_P08603-1
APSTYGGGLSVSSR	45	1338.66	1	| nxp:NX_P08779-1
VIETLLM(+15.994900)DTPSSYEAAMELFSPDQDM(+15.994900)REAGAQLK	45	3818.78	1	| nxp:NX_P11684-1
THLPGFVEQAEALK	45	1539.82	1	| nxp:NX_P30044-1
AKSHPEVSIEHLGQVVQCSREEGLVCR	45	3104.54	1	| nxp:NX_P98088-1
CTCNGATHQVTCR	45	1564.64	1	| nxp:NX_Q9Y6R7-1
FAGDDAPR	44	848.39	11	| nxp:NX_P63267-2 | nxp:NX_P60709-1 | nxp:NX_P63261-1 | nxp:NX_P63267-1 | nxp:NX_P62736-1 | nxp:NX_P68133-1 | nxp:NX_P68032-1 | nxp:NX_P0CG39-1 | nxp:NX_P0CG38-1 | nxp:NX_Q6S8J3-1 | nxp:NX_A5A3E0-1
GRVEVLYQGSWGTVCDDYWDTNDANVVCR	44	3434.52	9	| nxp:NX_Q9UGM3-9 | nxp:NX_Q9UGM3-4 | nxp:NX_Q9UGM3-8 | nxp:NX_Q9UGM3-2 | nxp:NX_Q9UGM3-5 | nxp:NX_Q9UGM3-3 | nxp:NX_Q9UGM3-1 | nxp:NX_Q9UGM3-7 | nxp:NX_Q9UGM3-6
TALAPSTMK	44	919.492	7	| nxp:NX_P63267-2 | nxp:NX_P60709-1 | nxp:NX_P63261-1 | nxp:NX_P63267-1 | nxp:NX_P62736-1 | nxp:NX_P68133-1 | nxp:NX_P68032-1
ASLENSLEETK	44	1220.6	5	| contaminant_KERATIN08 | contaminant_KERATIN05 | nxp:NX_P02533-1 | contaminant_KERATIN07 | nxp:NX_P08779-1
IQVLQQQADDAEERAER	44	1998.98	5	| nxp:NX_P06753-3 | nxp:NX_P06753-4 | nxp:NX_P06753-6 | nxp:NX_P06753-5 | nxp:NX_P06753-2
DYNVTANSK	44	1011.47	3	| nxp:NX_P00338-5 | nxp:NX_P00338-2 | nxp:NX_P00338-3
SVFPLAPCSR	44	1133.58	3	| nxp:NX_P01859-1 | nxp:NX_P01861-1 | nxp:NX_P01860-1
CAAADPHECYAK	44	1392.57	3	| nxp:NX_P02768-3 | nxp:NX_P02768-2 | nxp:NX_P02768-1
CCKADDKETCFAEEGK	44	1947.79	3	| nxp:NX_P02768-3 | nxp:NX_P02768-2 | nxp:NX_P02768-1
SFFPENWLWR	44	1381.67	3	| nxp:NX_P0C0L4-2 | nxp:NX_P0C0L4-1 | nxp:NX_P0C0L5-1
GGSGGSYGR	44	797.354	2	| contaminant_KERATIN02 | nxp:NX_P35527-1
THNLEPYFESFINNLRR	44	2150.08	2	| contaminant_KERATIN13 | nxp:NX_P04264-1
FVNEESTIPR	44	1191.6	2	| contaminant_PIGR_HUMAN | nxp:NX_P01833-1
SELHCDKLHVDPENFR	44	1995.93	2	| nxp:NX_P02042-1 | nxp:NX_P68871-1
CTKEEHLCTQR	44	1461.66	2	| nxp:NX_P06753-5 | nxp:NX_P06753-2
AAQGLLACGVAQGALR	44	1555.84	1	| nxp:NX_O75594-1
LHTEAQIQEEGTVVELTGR	44	2110.08	1	| nxp:NX_P01023-1
VTIKPAPETEK	44	1212.68	1	| nxp:NX_P01024-1
SELTQDPAVSVALGQTVR	44	1870.99	1	| nxp:NX_P01714-1
ADYEKHKVYACEVTHQGLSSPVTK	44	2747.35	1	| nxp:NX_P01834-1
THTCPPCPAPELLGGPSVF	44	2036.96	1	| nxp:NX_P01857-1
EFTPQMQAAYQK	44	1441.68	1	| nxp:NX_P02042-1
AHYGGFTVQNEANKYQISVNK	44	2368.17	1	| nxp:NX_P02675-1
QDGSVDFGRK	44	1108.54	1	| nxp:NX_P02675-1
DNDGWLTSDPR	44	1275.56	1	| nxp:NX_P02675-1
NWGLSVYADKPETTKEQLGEFYEALDCLR	44	3432.64	1	| nxp:NX_P02763-1
SAQCLR	44	734.361	1	| nxp:NX_P03973-1
CPVTYGQCLMLNPPNFCEM(+15.994900)DGQCKR	44	3091.3	1	| nxp:NX_P03973-1
INTFHQYSVK	44	1236.64	1	| nxp:NX_P06702-1
VIEHIMEDLDTNADKQLSFEE	44	2476.15	1	| nxp:NX_P06702-1
HIIVACEGSPYVPVHFDASVEDST	44	2629.22	1	| nxp:NX_P07998-1
EEAENTLQSFR	44	1323.62	1	| nxp:NX_P08670-1
CLAYDFYPGKIDVHWTR	44	2141.03	1	| nxp:NX_P25311-1
IKSEHPGLSIGDTAK	44	1552.83	1	| nxp:NX_P26583-1
VIADNVKDWSK	44	1274.67	1	| nxp:NX_P60174-3
LSPADKTNVK	44	1072.6	1	| nxp:NX_P69905-1
VADALTNAVAHVDDM(+15.994900)PNALSALSDLHAHK	44	3012.48	1	| nxp:NX_P69905-1
EEYVGLSANQCAVPAKDR	44	2006.96	1	| nxp:NX_Q07654-1
CHSIINPKPFHSNCMFDTCNCER	44	2924.22	1	| nxp:NX_Q9HC84-1
LDLAGRDLTDYLMK	43	1623.84	8	| nxp:NX_P63267-2 | nxp:NX_P60709-1 | nxp:NX_P63261-1 | nxp:NX_Q562R1-1 | nxp:NX_P63267-1 | nxp:NX_P62736-1 | nxp:NX_P68133-1 | nxp:NX_P68032-1
RDQALTEEHAR	43	1325.66	4	| nxp:NX_P12814-2 | nxp:NX_P12814-1 | nxp:NX_P12814-3 | nxp:NX_P12814-4
LNQLCVLHEK	43	1253.67	3	| nxp:NX_P02768-3 | nxp:NX_P02768-2 | nxp:NX_P02768-1
MINLSVPDTIDER	43	1502.75	3	| nxp:NX_P13797-2 | nxp:NX_P13796-1 | nxp:NX_P13797-1
GADFLVTEVENGGSLGSK	43	1779.88	3	| nxp:NX_P14618-3 | nxp:NX_P14618-2 | nxp:NX_P14618-1
PQGDAAQKTDTSHHDQDHPTFNK	43	2575.16	2	| nxp:NX_P01009-2 | nxp:NX_P01009-1
AQLVDMK	43	804.428	2	| nxp:NX_P02671-2 | nxp:NX_P02671-1
LVTSKGDKELR	43	1245.72	2	| nxp:NX_P02671-2 | nxp:NX_P02671-1
SLHTLFGDKLCTVATLRETYGEM(+15.994900)ADCCAK	43	3363.55	2	| nxp:NX_P02768-3 | nxp:NX_P02768-1
KGEWVALNPLRK	43	1410.82	2	| nxp:NX_P08603-2 | nxp:NX_P08603-1
ITLYGR	43	722.42	2	| nxp:NX_P80188-2 | nxp:NX_P80188-1
VEGCFNQLLYDIR	43	1626.79	1	| nxp:NX_O60635-1
MYYSAVDPTKDIFTGLIGPMK	43	2347.17	1	| nxp:NX_P00450-1
DIASGLIGPLIICK	43	1469.84	1	| nxp:NX_P00450-1
QKDVDKEFYLFPTVFDENESLLLEDNIR	43	3416.69	1	| nxp:NX_P00450-1
AIGYLNTGYQR	43	1255.64	1	| nxp:NX_P01023-1
KPVEEYANCHLAR	43	1586.77	1	| nxp:NX_P02787-1
ADRDQYELLCLDNTR	43	1881.88	1	| nxp:NX_P02787-1
DLKCCM(+15.994900)GMCGK	43	1375.53	1	| nxp:NX_P03973-1
TPGAAANLELIFVGPQHAGNYR	43	2296.18	1	| nxp:NX_P04217-1
QFVEQHTPQLLTLVPR	43	1906.05	1	| nxp:NX_P07988-1
IFGSYDPRR	43	1110.57	1	| nxp:NX_P08311-1
FRCPPCTPER	43	1319.6	1	| nxp:NX_P18065-1
CAMLNPPNR	43	1072.5	1	| nxp:NX_P19957-1
ATNYNAGDRSTDYGIFQI	43	2005.92	1	| nxp:NX_P61626-1
GISLANWMCLAKWESGYNTR	43	2357.12	1	| nxp:NX_P61626-1
YWCNDGKTPGAVNAC	43	1712.72	1	| nxp:NX_P61626-1
HTGPGILSMANAGPNTNGSQFFICTAK	43	2791.33	1	| nxp:NX_P62937-1
SYRPGAVVPSDKNCQSCLCTER	43	2584.17	1	| nxp:NX_P98088-1
CQCCQELR	43	1153.45	1	| nxp:NX_P98088-1
EVDEQMLNVQNK	42	1446.69	4	| nxp:NX_P07437-1 | nxp:NX_P68371-1 | nxp:NX_Q13885-1 | nxp:NX_Q9BVA1-1
SCMVGHEALPLAFTQK	42	1788.88	3	| nxp:NX_P01877-1 | contaminant_I47175 | nxp:NX_P01876-1
GDTFSCMVGHEALPLAFTQK	42	2209.04	2	| contaminant_I47175 | nxp:NX_P01876-1
WSGQTAICDNGAGYCSNPGIPIGTR	42	2652.19	2	| nxp:NX_P00751-2 | nxp:NX_P00751-1
QEPERNECFLQHK	42	1714.8	2	| nxp:NX_P02768-3 | nxp:NX_P02768-1
TFTTQETITNAETAK	42	1655.81	2	| nxp:NX_P06744-1 | nxp:NX_P06744-2
LRENELTYYCCKK	42	1776.84	2	| nxp:NX_P13987-1 | nxp:NX_P13987-2
NEDKDPAFTALLTTQTQVQR	42	2276.15	2	| nxp:NX_P54108-2 | nxp:NX_P54108-3
MYATIYELKEDK	42	1503.74	2	| nxp:NX_P80188-2 | nxp:NX_P80188-1
DPCTANPFRK	42	1205.57	2	| nxp:NX_P98088-1 | nxp:NX_Q9HC84-1
ALASECAQHLSLPLR	42	1665.87	1	| nxp:NX_O75594-1
HYYIGIIETTWDYASDHGEKK	42	2526.19	1	| nxp:NX_P00450-1
GTEAAGAMFLEAIPMSIPPEVK	42	2259.14	1	| nxp:NX_P01009-1
AVLTIDEKGTEAAGAMFLEAIPM(+15.994900)SIPPEVK	42	3144.62	1	| nxp:NX_P01009-1
KVLLDGVQNPR	42	1238.72	1	| nxp:NX_P01024-1
GFQALGDAADIR	42	1233.62	1	| nxp:NX_P01033-1
TRFVYHLSDLCK	42	1538.78	1	| nxp:NX_P01591-1
TPEVTCVVVDVSHEDPEVQFNWYVDGVEVHNAK	42	3797.78	1	| nxp:NX_P01859-1
YQISVNK	42	851.462	1	| nxp:NX_P02675-1
DKATFGCHDGYSLDGPEEIECTK	42	2629.12	1	| nxp:NX_P02749-1
VAAGAFQGLR	42	989.553	1	| nxp:NX_P02750-1
M(+15.994900)YLGYEYVTAIR	42	1494.73	1	| nxp:NX_P02787-1
FQLFGSPSGQKDLLFK	42	1811.97	1	| nxp:NX_P02788-1
SQQSSDPDPNCVDRPVEGYLAVAVVRR	42	3014.47	1	| nxp:NX_P02788-1
SLGPNSCSANGPGLYLIHGPNLYCYSDVEKLNAAK	42	3779.82	1	| nxp:NX_P02790-1
RLWWLDLK	42	1129.65	1	| nxp:NX_P02790-1
LSQEDPDYGIR	42	1292.61	1	| nxp:NX_P04040-1
LLIYWASTR	42	1122.63	1	| nxp:NX_P06312-1
NKKEFDHNSNIR	42	1501.75	1	| nxp:NX_P08603-1
TKEEYGHSEVVEYYCNPR	42	2260	1	| nxp:NX_P08603-1
VDTDGNGYISFNELNDLFK	42	2161.01	1	| nxp:NX_P13796-1
SGYLSSER	42	898.427	1	| nxp:NX_P15311-1
VQNATLAVANITNADSATR	42	1930	1	| nxp:NX_P27105-1
LVPVLSAK	42	826.54	1	| nxp:NX_P37837-1
SSDANLYR	42	925.437	1	| nxp:NX_P49913-1
FQSSAVM(+15.994900)ALQEACEAYLVGLFEDTNLCAIHAK	42	3602.7	1	| nxp:NX_P68431-1
VADALTNAVAHVDDMPNALSALSDLHAHKLR	42	3265.67	1	| nxp:NX_P69905-1
VDGVVIQLTK	42	1071.64	1	| nxp:NX_P98088-1
HPPPPPFQNQQRP	42	1539.78	1	| nxp:NX_Q16378-1
SKEEAFDAICQLVAGKEPANVGVTK	42	2661.36	1	| nxp:NX_Q9BW30-1
CADSSFTVLAELR	42	1468.71	1	| nxp:NX_Q9HC84-1
GVCSDWRGATGGLCDLTCPPTK	42	2408.08	1	| nxp:NX_Q9HC84-1
KCADSSFTVLAELRK	42	1724.9	1	| nxp:NX_Q9HC84-1
HLQLAIRNDEELNKLLGK	41	2104.19	7	| nxp:NX_Q99878-1 | nxp:NX_Q16777-1 | nxp:NX_Q9BTM1-1 | nxp:NX_P0C0S8-1 | nxp:NX_P20671-1 | nxp:NX_Q6FI13-1 | nxp:NX_Q9BTM1-2
HQGVMVGM(+15.994900)GQKDSYVGDEAQSKR	41	2523.17	6	| nxp:NX_P60709-1 | nxp:NX_P63261-1 | nxp:NX_P63267-1 | nxp:NX_P62736-1 | nxp:NX_P68133-1 | nxp:NX_P68032-1
VLSGGTTM(+15.994900)YPGIADR	41	1553.76	6	| nxp:NX_P63267-2 | nxp:NX_P60709-1 | nxp:NX_P63261-1 | nxp:NX_P63267-1 | nxp:NX_P62736-1 | nxp:NX_P68032-1
NLQEAEEWYK	41	1309.61	3	| nxp:NX_P08670-1 | nxp:NX_P41219-1 | nxp:NX_P41219-2
FM(+15.994900)ETVAEK	41	970.455	3	| nxp:NX_P10909-6 | nxp:NX_P10909-5 | nxp:NX_P10909-2
YGAATFTR	41	886.442	3	| nxp:NX_P20742-2 | nxp:NX_P01023-1 | nxp:NX_P20742-1
M(+15.994900)LPVADQDQCIR	41	1461.68	2	| nxp:NX_P00738-2 | nxp:NX_P00738-1
KVTSIQDWVQK	41	1331.73	2	| nxp:NX_P00738-2 | nxp:NX_P00738-1
TITGMCNNR	41	1066.48	2	| nxp:NX_P05164-1 | nxp:NX_P05164-3
VTCPEQDKYR	41	1295.6	2	| nxp:NX_P05164-1 | nxp:NX_P05164-3
TLAQLNPESSLFIIASK	41	1832.02	2	| nxp:NX_P06744-1 | nxp:NX_P06744-2
AVELAANTK	41	916.51	2	| nxp:NX_P29401-1 | nxp:NX_P29401-2
IAQLEEQLDNETKER	41	1815.91	2	| nxp:NX_P35579-2 | nxp:NX_P35579-1
INSITVDNCK	41	1163.57	2	| nxp:NX_Q01518-2 | nxp:NX_Q01518-1
KTLCSMEEAINER	41	1580.74	2	| nxp:NX_Q9HD89-2 | nxp:NX_Q9HD89-1
LISVDTEHSNIYLQNGPDR	41	2171.07	1	| nxp:NX_P00450-1
ACANPAAGSVILLENLR	41	1768.94	1	| nxp:NX_P00558-1
NPDPWAK	41	827.405	1	| nxp:NX_P02787-1
SMGGKEDLIWELLNQAQEHFGKDK	41	2773.36	1	| nxp:NX_P02787-1
EDLSDEAERDEYELLCPDNTR	41	2569.1	1	| nxp:NX_P02788-1
ARVVWCAVGEQELRK	41	1800.95	1	| nxp:NX_P02788-1
CLAPLEGAR	41	986.509	1	| nxp:NX_P04217-1
MHEGDEGPGHHHKPGLG	41	1791.8	1	| nxp:NX_P06702-1
CKPVNTFVHEPLVDVQNVCFQEK	41	2787.36	1	| nxp:NX_P07998-1
NSLESYAFNMK	41	1303.6	1	| nxp:NX_P11142-1
NQNTFLR	41	892.463	1	| nxp:NX_P12724-1
FGNADGAACHFPFIFEGR	41	2012.91	1	| nxp:NX_P14780-1
AVLFCLSEDKK	41	1309.68	1	| nxp:NX_P23528-1
AEPPKAPEQEQAAPGPAAGGEAPK	41	2298.14	1	| nxp:NX_P80723-1
NQDQQGPFKM(+15.994900)CLNYEVR	41	2142.97	1	| nxp:NX_P98088-1
AESSLTKDALVLTPASLWKPSSPVSQ	41	2712.45	1	| nxp:NX_Q8TDL5-1
VYSTSVTGSR	41	1056.53	1	| nxp:NX_Q9H299-1
AISGLTIDGHAVGAK	41	1409.77	1	| nxp:NX_Q9Y6R7-1
VAVIVSNDHAGK	41	1209.66	1	| nxp:NX_Q9Y6R7-1
NTDQASMPDNTAAQK	40	1591.7	6	| nxp:NX_P35579-2 | nxp:NX_P35749-4 | nxp:NX_P35749-3 | nxp:NX_P35579-1 | nxp:NX_P35749-1 | nxp:NX_P35749-2
IEISELNR	40	973.531	4	| nxp:NX_P35908-1 | contaminant_KERATIN13 | nxp:NX_P04264-1 | contaminant_KERATIN22
EDPQGDAAQK	40	1058.47	3	| nxp:NX_P01009-2 | nxp:NX_P01009-1 | nxp:NX_P20848-1
TPSAAYLWVGTGASEAEKTGAQELLR	40	2706.37	3	| nxp:NX_P06396-4 | nxp:NX_P06396-3 | nxp:NX_P06396-1
VQQPDCREPFLSCCQFAESLR	40	2627.18	3	| nxp:NX_P0C0L4-2 | nxp:NX_P0C0L4-1 | nxp:NX_P0C0L5-1
SKAEAESLYQSK	40	1340.67	2	| contaminant_KERATIN13 | nxp:NX_P04264-1
WELLQQVDTSTR	40	1475.75	2	| contaminant_KERATIN13 | nxp:NX_P04264-1
YEELQQTAGR	40	1194.57	2	| contaminant_KERATIN17 | nxp:NX_P13647-1
FSGSGSGTDFTLTISR	40	1632.79	2	| nxp:NX_A0A0C4DH25-1 | nxp:NX_P01619-1
VVLHPNYSQVDIGLIK	40	1795.01	2	| nxp:NX_P00738-2 | nxp:NX_P00738-1
VAQLEAQCQEPCKDTVQIHDITGK	40	2768.33	2	| nxp:NX_P02679-2 | nxp:NX_P02679-1
IAFAQYLQQCPFEDHVK	40	2094.01	2	| nxp:NX_P02768-3 | nxp:NX_P02768-1
ILATPPQEDAPSVDIANIR	40	2020.07	2	| nxp:NX_P29401-1 | nxp:NX_P29401-2
LQQNFQDNQFQGK	40	1594.76	2	| nxp:NX_P80188-2 | nxp:NX_P80188-1
MYATIYELK	40	1131.58	2	| nxp:NX_P80188-2 | nxp:NX_P80188-1
KYNTYAYVGLTEGPSPGDFR	40	2235.07	2	| nxp:NX_Q8IWL1-1 | nxp:NX_Q8IWL2-2
LPPTTTCQQQK	40	1301.65	1	| nxp:NX_P00751-1
FNRPFLMIIVPTDTQNIFFMSK	40	2659.38	1	| nxp:NX_P01011-1
DICEEQVNSLPGSITK	40	1789.86	1	| nxp:NX_P01024-1
TMQALPYSTVGNSNNYLHLSVLR	40	2578.31	1	| nxp:NX_P01024-1
SEETKENEGFTVTAEGK	40	1855.86	1	| nxp:NX_P01024-1
SEFPESWLWNVEDLKEPPKNGISTK	40	2930.46	1	| nxp:NX_P01024-1
IIVPLNNR	40	938.578	1	| nxp:NX_P01591-1
THTCPPCPAPELL	40	1492.69	1	| nxp:NX_P01857-1
YLTWASRQEPSQGTTTFAVTSILR	40	2713.39	1	| nxp:NX_P01876-1
LKCDEWSVNSVGK	40	1521.74	1	| nxp:NX_P02787-1
SSQEPYFSYSGAFK	40	1597.72	1	| nxp:NX_P02788-1
FSYSGAFK	40	906.436	1	| nxp:NX_P02788-1
FDPVRGEVPPR	40	1268.67	1	| nxp:NX_P02790-1
LLELTGPK	40	870.529	1	| nxp:NX_P04217-1
SGLSTGWTQLSK	40	1264.65	1	| nxp:NX_P04217-1
GLETSLAECTFTK	40	1456.7	1	| nxp:NX_P05156-1
DLQNFLKKENK	40	1376.75	1	| nxp:NX_P06702-1
KTCSVSEWII	40	1222.61	1	| nxp:NX_P08118-1
QVDQLTNDKAR	40	1287.67	1	| nxp:NX_P08670-1
EDVSQEESLFLISGKPEGR	40	2120.05	1	| nxp:NX_P10163-1
THNDIIHNENMR	40	1493.69	1	| nxp:NX_P15311-1
DGEEAGAYDGPR	40	1236.51	1	| nxp:NX_P30101-1
YLSEVASGDNK	40	1182.56	1	| nxp:NX_P31946-1
DGYNYTLSK	40	1060.49	1	| nxp:NX_P31949-1
TLLGDGPVVTDPK	40	1311.72	1	| nxp:NX_P52566-1
FPHFDLSHGSAQVK	40	1569.78	1	| nxp:NX_P69905-1
AEPEKTEGAAEAK	40	1330.65	1	| nxp:NX_P80723-1
LADGGATNQGRVEIFYR	40	1866.95	1	| nxp:NX_Q08380-1
LADGGATNQGR	40	1059.52	1	| nxp:NX_Q08380-1
QVM(+15.994900)NLLVPSLPNLVK	40	1680.97	1	| nxp:NX_Q8TDL5-1
FASFIDKVR	39	1082.6	30	| nxp:NX_Q86Y46-2 | contaminant_KERATIN19 | nxp:NX_P08729-1 | nxp:NX_Q14CN4-3 | contaminant_KERATIN20 | nxp:NX_Q14CN4-2 | nxp:NX_Q14CN4-1 | nxp:NX_P05787-2 | nxp:NX_Q8N1N4-1 | nxp:NX_Q3SY84-1 | nxp:NX_Q7RTS7-1 | nxp:NX_Q5XKE5-1 | nxp:NX_Q86Y46-1 | nxp:NX_O95678-1 | contaminant_KERATIN18 | nxp:NX_P02538-1 | nxp:NX_P48668-1 | nxp:NX_P04259-1 | nxp:NX_Q7Z794-1 | contaminant_KERATIN17 | nxp:NX_P13647…
VGWEQLLTTIAR	39	1386.77	7	| nxp:NX_O43707-3 | nxp:NX_O43707-2 | nxp:NX_P12814-2 | nxp:NX_P12814-1 | nxp:NX_O43707-1 | nxp:NX_P12814-3 | nxp:NX_P12814-4
AVGDKLPECEAV	39	1287.62	4	| nxp:NX_P00738-2 | nxp:NX_P00739-1 | nxp:NX_P00739-2 | nxp:NX_P00738-1
DEFKPLVEEPQNLIK	39	1798.96	3	| nxp:NX_P02768-3 | nxp:NX_P02768-2 | nxp:NX_P02768-1
CREMDEQIR	39	1236.55	3	| nxp:NX_P06753-3 | nxp:NX_P06753-6 | nxp:NX_P06753-2
NALESYAFNMK	39	1287.6	3	| nxp:NX_P0DMV8-2 | nxp:NX_P0DMV8-1 | nxp:NX_P34931-1
QGVDADINGLR	39	1157.59	2	| contaminant_KERATIN02 | nxp:NX_P35527-1
NADLQVLKPEPELV	39	1564.86	2	| contaminant_PIGR_HUMAN | nxp:NX_P01833-1
YWCLWEGAQNGRCPLLVDSEGWVK	39	2923.37	2	| contaminant_PIGR_HUMAN | nxp:NX_P01833-1
IADDGCPKPPEIAHGYVEHSVR	39	2447.18	2	| nxp:NX_P00738-2 | nxp:NX_P00738-1
IGEIKEETTSHLR	39	1512.8	2	| nxp:NX_P01042-3 | nxp:NX_P01042-2
AEDTALYYCAK	39	1304.58	2	| nxp:NX_P01782-1 | nxp:NX_P0DP04-1
LVIVGDGACGK	39	1088.58	2	| nxp:NX_P08134-1 | nxp:NX_P61586-1
NHEEEMKDLR	39	1300.6	2	| nxp:NX_P13645-1 | contaminant_KERATIN03
QKPITPETAEK	39	1241.67	2	| nxp:NX_P60953-1 | nxp:NX_P60953-2
ATEDEGSEQKIPEATNR	39	1874.87	1	| nxp:NX_P01008-1
TELRPGETLNVNFLLR	39	1872.03	1	| nxp:NX_P01024-1
TRFVYHLSDLCKK	39	1666.87	1	| nxp:NX_P01591-1
SAVQGPPERDLCGCYSVSSVLPGCAQPWNHGETFTCTAAHPELK	39	4871.21	1	| nxp:NX_P01877-1
YADKPETTKEQLGEFYEALDCLR	39	2776.31	1	| nxp:NX_P02763-1
NSKFEDCCQEK	39	1444.58	1	| nxp:NX_P02774-3
LCMGSGLNLCEPNNKEGYYGYTGAFR	39	2971.32	1	| nxp:NX_P02787-1
TVFEDLSDEAERDEYELLCPDNTR	39	2916.28	1	| nxp:NX_P02788-1
DGAGDVAFIRES	39	1236.59	1	| nxp:NX_P02788-1
RLEKEVGTPHGIILDSVDAAFICPGSSR	39	3024.56	1	| nxp:NX_P02790-1
LNPPNFCEMDGQCKR	39	1865.81	1	| nxp:NX_P03973-1
AGVCPPKKSAQCL	39	1415.71	1	| nxp:NX_P03973-1
IGAEVYHNLK	39	1143.62	1	| nxp:NX_P06733-1
FDGILGMAYPR	39	1239.62	1	| nxp:NX_P07339-1
KHLEINPDHSIIETLR	39	1915.04	1	| nxp:NX_P07900-2
EDCKYIVVEK	39	1282.63	1	| nxp:NX_P08118-1
GRQAGVCFGDSGSPLVCNGLIHGIASFVR	39	3031.5	1	| nxp:NX_P08246-1
AQWFAIQHISLNPPR	39	1777.95	1	| nxp:NX_P12724-1
GVQLSDWRDGVCTK	39	1620.78	1	| nxp:NX_Q9HC84-1
AIGYATAADCGR	39	1225.56	1	| nxp:NX_Q9Y6R7-1
GEVGFVLVDNQR	39	1332.69	1	| nxp:NX_Q9Y6R7-1
LLVSASQDGK	38	1017.56	6	| nxp:NX_P62873-2 | nxp:NX_Q9HAV0-1 | nxp:NX_P62873-1 | nxp:NX_P62879-1 | nxp:NX_P16520-2 | nxp:NX_P16520-1
KKELEEIVQPIISK	38	1653.98	5	| contaminant_GR78_HUMAN | contaminant_GR78_MESAU | contaminant_GR78_RAT | nxp:NX_P11021-1 | contaminant_GR78_MOUSE
YIFHNFMER	38	1256.59	4	| nxp:NX_Q14624-4 | nxp:NX_Q14624-3 | nxp:NX_Q14624-2 | nxp:NX_Q14624-1
GTHVDLGLASANVDFAFSLYK	38	2225.12	3	| nxp:NX_P01011-3 | nxp:NX_P01011-2 | nxp:NX_P01011-1
QNCELFEQLGEYKFQNA	38	2117.96	3	| nxp:NX_P02768-3 | nxp:NX_P02768-2 | nxp:NX_P02768-1
RM(+15.994900)PCAEDYLSV	38	1356.59	3	| nxp:NX_P02768-3 | nxp:NX_P02768-2 | nxp:NX_P02768-1
M(+15.994900)PCAEDYLSVVLNQLCVLHEK	38	2534.21	3	| nxp:NX_P02768-3 | nxp:NX_P02768-2 | nxp:NX_P02768-1
EIVMTQSPATLSVSPGER	38	1901.96	2	| nxp:NX_A0A087WSY6-1 | nxp:NX_P01624-1
SADTLWGIQK	38	1118.58	2	| nxp:NX_P00338-4 | nxp:NX_P00338-3
LQHLENELTHDIITK	38	1803.96	2	| nxp:NX_P01009-2 | nxp:NX_P01009-1
RLGMFNIQHCK	38	1403.7	2	| nxp:NX_P01009-2 | nxp:NX_P01009-1
DKCEPLEK	38	1018.49	2	| nxp:NX_P02763-1 | nxp:NX_P19652-1
TYETTLEKCCAAADPHECYAK	38	2518.07	2	| nxp:NX_P02768-2 | nxp:NX_P02768-1
DLPSLAADFVESK	38	1391.71	2	| nxp:NX_P02768-2 | nxp:NX_P02768-1
NEVTEFAK	38	937.462	2	| nxp:NX_P02768-3 | nxp:NX_P02768-1
LVRPEVDVM(+15.994900)CTAFHDNEETFLK	38	2666.26	2	| nxp:NX_P02768-3 | nxp:NX_P02768-1
PERNECFLQHKDDNPNLPR	38	2379.13	2	| nxp:NX_P02768-3 | nxp:NX_P02768-1
VTTSQDMLSIMEK	38	1482.72	2	| nxp:NX_P05155-1 | nxp:NX_P05155-3
DFVNCSTLPALNLASWR	38	1963.97	2	| nxp:NX_P05164-1 | nxp:NX_P05164-3
DDETMYVESK	38	1216.5	1	| nxp:NX_O15144-1
FCLDNGAK	38	924.424	1	| nxp:NX_P00558-1
DCVGPEVEK	38	1032.47	1	| nxp:NX_P00558-1
DISEVVTPR	38	1015.54	1	| nxp:NX_P00751-1
VAAEDWKKGDTFSCMVGHEALPLAFTQK	38	3136.52	1	| nxp:NX_P01876-1
KCSYTEDAQCIDGTIEVPK	38	2214.01	1	| nxp:NX_P02749-1
PVSCIKR	38	859.482	1	| nxp:NX_P02788-1
VWCAVGEQELRK	38	1474.75	1	| nxp:NX_P02788-1
VWVYPPEKK	38	1145.64	1	| nxp:NX_P02790-1
PQGPPQQGGHPRPPR	38	1605.84	1	| nxp:NX_P02810-1
GQCLMLNPPNFCEMDGQCKR	38	2455.04	1	| nxp:NX_P03973-1
RGEKELLVPR	38	1196.71	1	| nxp:NX_P04217-1
LETPDFQLFK	38	1237.65	1	| nxp:NX_P04217-1
TDKTLVLLMGK	38	1218.71	1	| nxp:NX_P07737-1
EGVHGGLINKK	38	1151.65	1	| nxp:NX_P07737-1
HLEINPDHSIIETLR	38	1786.94	1	| nxp:NX_P07900-2
NGENLEVR	38	930.464	1	| nxp:NX_P20061-1
VALYVDWIR	38	1134.63	1	| nxp:NX_P24158-1
ERQEAEEAKEALLQASR	38	1957.99	1	| nxp:NX_P26038-1
KNQKDPGVLDR	38	1269.69	1	| nxp:NX_P31949-1
VDDFLANEAK	38	1121.55	1	| nxp:NX_P52209-1
LPACVVDCGTGYTK	38	1540.71	1	| nxp:NX_P61158-1
TLSELHCDKLHVDPENFR	38	2210.07	1	| nxp:NX_P68871-1
AAWGKVGAHAGEYGAEALER	38	2043	1	| nxp:NX_P69905-1
CSLPNDKEGSCPQVNINFPQLGLCR	38	2903.36	1	| nxp:NX_Q14508-1
HVGTEGSMATVGLSQQLFDSALLLLQK	38	2843.5	1	| nxp:NX_Q8N4F0-1
QCPTCVQPLGTCSSGSPR	38	1991.87	1	| nxp:NX_Q8N6Q3-1
CPPSQPFFNEDQM(+15.994900)K	38	1740.74	1	| nxp:NX_Q9HC84-1
KCGLTDNENCLK	38	1451.66	1	| nxp:NX_Q9HC84-1
HLQLAIR	37	850.526	17	| nxp:NX_Q71UI9-3 | nxp:NX_Q71UI9-4 | nxp:NX_Q71UI9-2 | nxp:NX_Q99878-1 | nxp:NX_P0C0S5-1 | nxp:NX_Q71UI9-1 | nxp:NX_Q16777-1 | nxp:NX_Q9BTM1-1 | nxp:NX_P0C0S8-1 | nxp:NX_P04908-1 | nxp:NX_Q93077-1 | nxp:NX_P20671-1 | nxp:NX_Q7L7L0-1 | nxp:NX_Q6FI13-1 | nxp:NX_Q96QV6-1 | nxp:NX_P16104-1 | nxp:NX_Q9BTM1-2
KAGFAGDDAPR	37	1104.54	11	| nxp:NX_P63267-2 | nxp:NX_P60709-1 | nxp:NX_P63261-1 | nxp:NX_P63267-1 | nxp:NX_P62736-1 | nxp:NX_P68133-1 | nxp:NX_P68032-1 | nxp:NX_P0CG39-1 | nxp:NX_P0CG38-1 | nxp:NX_Q6S8J3-1 | nxp:NX_A5A3E0-1
AATGECTATVGK	37	1165.55	3	| nxp:NX_P01042-3 | nxp:NX_P01042-2 | nxp:NX_P01042-1
RMPCAEDYLSVV	37	1439.67	3	| nxp:NX_P02768-3 | nxp:NX_P02768-2 | nxp:NX_P02768-1
KDLGEENFK	37	1079.54	3	| nxp:NX_P02768-3 | nxp:NX_P02768-2 | nxp:NX_P02768-1
YEELQITAGR	37	1179.6	3	| nxp:NX_P04259-1 | contaminant_KERATIN13 | nxp:NX_P04264-1
GDVCQDCIQMVTDIQTAVR	37	2209	3	| nxp:NX_P07602-1 | nxp:NX_P07602-2 | nxp:NX_P07602-3
ASSIIDELFQDR	37	1393.7	3	| nxp:NX_P10909-6 | nxp:NX_P10909-5 | nxp:NX_P10909-2
ALDFEQEMATAASSSSLEK	37	2014.93	3	| nxp:NX_P60709-1 | nxp:NX_P63261-1 | nxp:NX_Q6S8J3-1
FSSYEKYWCK	37	1397.62	2	| contaminant_PIGR_HUMAN | nxp:NX_P01833-1
RLYGSEAFATDFQDSAAAK	37	2047.97	2	| nxp:NX_P01011-2 | nxp:NX_P01011-1
SSEMPELTSMHTLLLR	37	1844.92	2	| nxp:NX_P05164-1 | nxp:NX_P05164-3
LEAIPM(+15.994900)SIPPEVK	37	1439.78	1	| nxp:NX_P01009-1
LVAYYTLIGASGQR	37	1511.82	1	| nxp:NX_P01024-1
CTCVPPHPQTAFCNSDLVIR	37	2372.09	1	| nxp:NX_P01033-1
SKEQLTPLIK	37	1156.69	1	| nxp:NX_P02652-1
TPCTVSCNIPVVSGKECEEIIR	37	2548.22	1	| nxp:NX_P02675-1
ARVVWCAVGEQELR	37	1672.86	1	| nxp:NX_P02788-1
DLKCCMGM(+15.994900)CGK	37	1375.53	1	| nxp:NX_P03973-1
TYGQCLM(+15.994900)LNPPNFCEMDGQCKR	37	2735.15	1	| nxp:NX_P03973-1
LNPPNFCEM(+15.994900)DGQCKR	37	1881.8	1	| nxp:NX_P03973-1
SIAQYWLGCPAPGHL	37	1669.82	1	| nxp:NX_P04004-1
DITSDTSGDFR	37	1213.53	1	| nxp:NX_P04083-1
VIHDNFGIVEGLMTTVHAITATQK	37	2595.36	1	| nxp:NX_P04406-1
TIINTFHQYSVK	37	1450.77	1	| nxp:NX_P06702-1
DWIDGVLNNPGPG	37	1353.64	1	| nxp:NX_P20160-1
KTQEQLALEMAELTAR	37	1831.96	1	| nxp:NX_P26038-1
AAPEASGTPSSDAVSRLEEEMR	37	2290.06	1	| nxp:NX_P31146-1
NYNAGDRSTDYGIFQINSR	37	2191.02	1	| nxp:NX_P61626-1
RLGMDGYRGI	37	1137.58	1	| nxp:NX_P61626-1
PHFDLSHGSAQVK	37	1422.71	1	| nxp:NX_P69905-1
AESHPEVNIEHLGQVVQCSREEGLVCR	37	3132.49	1	| nxp:NX_P98088-1
CLGPHGEPVK	37	1093.55	1	| nxp:NX_P98088-1
HRDLAGHCYYALCSQDCQVVR	37	2608.16	1	| nxp:NX_P98088-1
PFQNQQRPPR	37	1267.67	1	| nxp:NX_Q16378-1
TPDGSLLVR	37	957.536	1	| nxp:NX_Q9Y6R7-1
AM(+15.994900)GIMNSFVNDIFER	36	1759.81	14	| nxp:NX_Q99879-1 | nxp:NX_Q99880-1 | nxp:NX_Q16778-1 | nxp:NX_P33778-1 | nxp:NX_P23527-1 | nxp:NX_O60814-1 | nxp:NX_P58876-1 | nxp:NX_P57053-1 | nxp:NX_Q93079-1 | nxp:NX_P06899-1 | nxp:NX_Q8N257-1 | nxp:NX_P62807-1 | nxp:NX_Q99877-1 | nxp:NX_Q5QNW6-2
LSVDYGK	36	781.409	6	| nxp:NX_P0DPH7-2 | nxp:NX_P68366-1 | nxp:NX_Q9BQE3-1 | nxp:NX_P0DPH7-1 | nxp:NX_Q71U36-1 | nxp:NX_P68363-1
HQGVMVGMGQKDSYVGDEAQSKR	36	2507.18	6	| nxp:NX_P60709-1 | nxp:NX_P63261-1 | nxp:NX_P63267-1 | nxp:NX_P62736-1 | nxp:NX_P68133-1 | nxp:NX_P68032-1
HQGVM(+15.994900)VGM(+15.994900)GQKDSYVGDEAQSK	36	2383.07	6	| nxp:NX_P60709-1 | nxp:NX_P63261-1 | nxp:NX_P63267-1 | nxp:NX_P62736-1 | nxp:NX_P68133-1 | nxp:NX_P68032-1
ADTLTDEINFLR	36	1407.71	5	| contaminant_KERATIN21 | contaminant_KERATIN18 | nxp:NX_P02538-1 | nxp:NX_P48668-1 | nxp:NX_P04259-1
GDKLPECEAVCGKPK	36	1687.81	4	| nxp:NX_P00738-2 | nxp:NX_P00739-1 | nxp:NX_P00739-2 | nxp:NX_P00738-1
SCSVM(+15.994900)HEALHNHYTQK	36	1957.86	4	| nxp:NX_P01859-1 | nxp:NX_P01861-1 | nxp:NX_P01857-1 | contaminant_NRL_1MCOH
DGETPDPEDPSR	36	1314.54	4	| nxp:NX_P09960-3 | nxp:NX_P09960-2 | nxp:NX_P09960-4 | nxp:NX_P09960-1
LHQDWLNGK	36	1110.57	3	| nxp:NX_P01861-1 | nxp:NX_P01857-1 | nxp:NX_P01860-1
EFNAETFTFHADIC	36	1701.72	3	| nxp:NX_P02768-3 | nxp:NX_P02768-2 | nxp:NX_P02768-1
AAADPHECYAK	36	1232.54	3	| nxp:NX_P02768-3 | nxp:NX_P02768-2 | nxp:NX_P02768-1
AADPHECYAK	36	1161.5	3	| nxp:NX_P02768-3 | nxp:NX_P02768-2 | nxp:NX_P02768-1
VLNQLCVLHEKTPVSDRVTK	36	2336.28	3	| nxp:NX_P02768-3 | nxp:NX_P02768-2 | nxp:NX_P02768-1
EGSCPQVNINFPQLGLCR	36	2089	3	| nxp:NX_Q14508-2 | nxp:NX_Q14508-3 | nxp:NX_Q14508-1
LGDVYVNDAFGTAHR	36	1634.79	2	| nxp:NX_P00558-1 | nxp:NX_P07205-1
MKGLIDEVNQDFTNR	36	1779.87	2	| nxp:NX_P02671-2 | nxp:NX_P02671-1
TSTADYAMFK	36	1134.51	2	| nxp:NX_P02679-2 | nxp:NX_P02679-1
FGSYCPTTCGIADFLSTY	36	2059.88	2	| nxp:NX_P02679-2 | nxp:NX_P02679-1
LQHKDDNPNLPR	36	1446.74	2	| nxp:NX_P02768-3 | nxp:NX_P02768-1
HRLEDMEQALSPSVFK	36	1886.94	2	| nxp:NX_P05155-1 | nxp:NX_P05155-3
ELEQVCNPIISGLYQGAGGPGPGGFGAQGPK	36	3055.49	2	| nxp:NX_P0DMV8-2 | nxp:NX_P0DMV8-1
HQPTAIIAK	36	978.573	2	| nxp:NX_P29401-1 | nxp:NX_P29401-2
YGTCIYQGRLWAFCC	36	1954.84	2	| nxp:NX_P59666-1 | nxp:NX_P59665-1
HQILQTR	36	895.511	2	| nxp:NX_Q8IWL1-1 | nxp:NX_Q8IWL2-2
TEDTAVYYCAR	36	1348.58	1	| nxp:NX_A0A0B4J1Y9-1
GPEEEHLGILGPVIWAEVGDTIR	36	2487.29	1	| nxp:NX_P00450-1
SGIECQLWR	36	1148.55	1	| nxp:NX_P00734-1
EELLPAQDIK	36	1155.63	1	| nxp:NX_P00751-1
AAQVTIQSSGTFSSK	36	1511.77	1	| nxp:NX_P01023-1
QKPDGVFQEDAPVIHQEMIGGLR	36	2564.29	1	| nxp:NX_P01024-1
AAVYHHFISDGVR	36	1471.74	1	| nxp:NX_P01024-1
MVETALTPDACYPD	36	1582.68	1	| nxp:NX_P01591-1
SGTSASLAISGLR	36	1219.66	1	| nxp:NX_P01700-1
RTVAAPSVFIFPPSDEQLKSGTASVVCLLNNFYPR	36	3881.01	1	| nxp:NX_P01834-1
TPEVTCVVVDVSHEDPEVKF	36	2286.1	1	| nxp:NX_P01857-1
PPPPPCCHPR	36	1214.56	1	| nxp:NX_P01877-1
THLAPYSDELR	36	1301.65	1	| nxp:NX_P02647-1
QKVEPLRAELQEGAR	36	1723.94	1	| nxp:NX_P02647-1
SPELQAEAK	36	972.5	1	| nxp:NX_P02652-1
SKEQLTPLIKK	36	1284.79	1	| nxp:NX_P02652-1
REEAPSLRPAPPPISGGGYR	36	2107.1	1	| nxp:NX_P02675-1
ALGHLDLSGNR	36	1152.61	1	| nxp:NX_P02750-1
LCDNLSTK	36	950.461	1	| nxp:NX_P02774-3
DKFKDCHLAR	36	1289.64	1	| nxp:NX_P02788-1
QAIAENRADAVTLDGGFIYEAGLAPYK	36	2853.44	1	| nxp:NX_P02788-1
VIEHIMEDLDTNADKQLSF	36	2218.07	1	| nxp:NX_P06702-1
SPDDPSR	36	773.342	1	| nxp:NX_P06733-1
LMIEMDGTENK	36	1280.59	1	| nxp:NX_P06733-1
TVIDYNGER	36	1066.52	1	| nxp:NX_P07237-1
WGHVGADDLCQECEDIVHILNK	36	2608.19	1	| nxp:NX_P07988-1
GLGTDEESILTLLTSR	36	1704.9	1	| nxp:NX_P08758-1
DQQEAALVDMVNDGVEDLR	36	2116.98	1	| nxp:NX_P09211-1
DYPDFSPSVDAEAIQK	36	1781.82	1	| nxp:NX_P12429-1
TTFANVVNVCGNQSIR	36	1779.88	1	| nxp:NX_P12724-1
EHVAHLLFLRDT	36	1450.78	1	| nxp:NX_P19652-1
ALAGCDFLTISPK	36	1392.72	1	| nxp:NX_P37837-1
AIDGINQR	36	886.474	1	| nxp:NX_P49913-1
SEYPSIK	36	823.42	1	| nxp:NX_P61916-1
RDNIQGITKPAIR	36	1481.85	1	| nxp:NX_P62805-1
VFLENVIRDAV	36	1274.71	1	| nxp:NX_P62805-1
YDDMAACMK	36	1104.42	1	| nxp:NX_P63104-1
VGAHAGEYGAEALERM	36	1660.77	1	| nxp:NX_P69905-1
HQDGLVVVTTK	36	1196.66	1	| nxp:NX_P98088-1
LNEDVSQEESPSVISGKPEGR	36	2257.09	1	| nxp:NX_Q04118-1
GCCFDSR	36	901.329	1	| nxp:NX_Q07654-1
GPPASSPAPAPK	36	1076.57	1	| nxp:NX_Q15942-1
AGGDM(+15.994900)ETFENIR	36	1355.59	1	| nxp:NX_Q9HC84-1
EEGLILFDQIPVSSGFSK	36	1966.02	1	| nxp:NX_Q9HC84-1
LDGPFAVCHDTLDPRPFLEQCVYDLCVVGGER	36	3734.74	1	| nxp:NX_Q9Y6R7-1
GATTSPGVYELSSR	36	1424.7	1	| nxp:NX_Q9Y6R7-1
YGFIEGHVVIPR	35	1386.75	17	| nxp:NX_P16070-15 | nxp:NX_P16070-18 | nxp:NX_P16070-12 | nxp:NX_P16070-14 | nxp:NX_P16070-13 | nxp:NX_P16070-11 | nxp:NX_P16070-10 | nxp:NX_P16070-16 | nxp:NX_P16070-8 | nxp:NX_P16070-9 | nxp:NX_P16070-17 | nxp:NX_P16070-4 | nxp:NX_P16070-6 | nxp:NX_P16070-3 | nxp:NX_P16070-7 | nxp:NX_P16070-5 | nxp:NX_P16070-1
AGFAGDDAPRAVFPSIVGRPR	35	2156.14	10	| nxp:NX_P63267-2 | nxp:NX_P60709-1 | nxp:NX_P63261-1 | nxp:NX_P63267-1 | nxp:NX_P62736-1 | nxp:NX_P68133-1 | nxp:NX_P68032-1 | nxp:NX_P0CG38-1 | nxp:NX_Q6S8J3-1 | nxp:NX_A5A3E0-1
IIAPPERK	35	923.567	8	| nxp:NX_P63267-2 | nxp:NX_P60709-1 | nxp:NX_P63261-1 | nxp:NX_Q562R1-1 | nxp:NX_P63267-1 | nxp:NX_P62736-1 | nxp:NX_P68133-1 | nxp:NX_P68032-1
VGDDLTVTNPK	35	1158.6	6	| nxp:NX_P13929-3 | nxp:NX_P09104-2 | nxp:NX_P13929-2 | nxp:NX_P09104-1 | nxp:NX_P13929-1 | nxp:NX_P06733-1
KALAAAGYDVEKNNSR	35	1706.88	5	| nxp:NX_P22492-1 | nxp:NX_P16403-1 | nxp:NX_Q02539-1 | nxp:NX_P10412-1 | nxp:NX_P16402-1
KVPQVSTPTLV	35	1168.69	4	| nxp:NX_P02768-3 | nxp:NX_P02768-2 | contaminant_INT-STD1 | nxp:NX_P02768-1
DIPTNSPELEETLTHTITK	35	2139.08	3	| nxp:NX_P01042-3 | nxp:NX_P01042-2 | nxp:NX_P01042-1
PDPAKSAPAPK	35	1078.59	3	| nxp:NX_P23527-1 | nxp:NX_Q93079-1 | nxp:NX_Q5QNW6-2
ASGVPDRFSGSGSGTDFTLK	35	1985.96	2	| nxp:NX_P01615-1 | nxp:NX_P01614-1
SGNTFRPEVHLLPPPSEELALNELV	35	2758.44	2	| nxp:NX_P01877-1 | nxp:NX_P01876-1
ALTDMPQMR	35	1062.51	2	| nxp:NX_P02671-2 | nxp:NX_P02671-1
LSQRFPKAEFAEVSK	35	1736.93	2	| nxp:NX_P02768-2 | nxp:NX_P02768-1
SHCIAEVENDEM(+15.994900)PA	35	1617.65	2	| nxp:NX_P02768-2 | nxp:NX_P02768-1
LQALKDTANR	35	1129.63	2	| nxp:NX_P29401-1 | nxp:NX_P29401-2
TTGIVM(+15.994900)DSGDGVTHTVPIYEGYALPHAILR	35	3199.61	2	| nxp:NX_P60709-1 | nxp:NX_P63261-1
SGINCPIQK	35	1016.52	2	| nxp:NX_P61916-2 | nxp:NX_P61916-1
AETTCHCQCAGM(+15.994900)DWTGAR	35	2127.81	2	| nxp:NX_Q9HD89-2 | nxp:NX_Q9HD89-1
LAALNPESNTAGLDIFAK	35	1844.98	1	| nxp:NX_O00299-1
KLISVDTEHSNIYLQNGPDR	35	2299.17	1	| nxp:NX_P00450-1
DLYSGLIGPLIVCR	35	1575.86	1	| nxp:NX_P00450-1
IYHSHIDAPKDIASGLIGPLIICKK	35	2759.53	1	| nxp:NX_P00450-1
ATTVTGTPCQDWAAQEPHR	35	2125.97	1	| nxp:NX_P00747-1
ALFVSEEEKK	35	1179.63	1	| nxp:NX_P00751-1
QGIPFFGQVR	35	1148.62	1	| nxp:NX_P01023-1
FISLGEACK	35	1024.51	1	| nxp:NX_P01024-1
NTMILEICTR	35	1250.62	1	| nxp:NX_P01024-1
DIVMTQSPLSLPVTPGEPASISCR	35	2555.28	1	| nxp:NX_P01615-1
FFESFGDLSSPDAVMGNPK	35	2044.93	1	| nxp:NX_P02042-1
KDVTVLQNTDGNNNEAWAK	35	2117.03	1	| nxp:NX_P02788-1
DLKLADFALLCLDGK	35	1691.9	1	| nxp:NX_P02788-1
LFAYPDTHR	35	1119.56	1	| nxp:NX_P04040-1
PYQYPALTPEQKK	35	1562.82	1	| nxp:NX_P04075-2
VIPELNGK	35	869.509	1	| nxp:NX_P04406-1
CHLEDNLYKR	35	1347.65	1	| nxp:NX_P05107-1
KKGADVWF	35	950.509	1	| nxp:NX_P05109-1
NITPAEVGVLVGKDR	35	1567.88	1	| nxp:NX_P07737-1
GGHFCGATLIAPNFVMSAAHCVANVNVR	35	2970.43	1	| nxp:NX_P08246-1
IPDYSDSFK	35	1071.5	1	| nxp:NX_P17213-1
GGICNGDGGTPLVCEGLAHGVASFSLGPCGR	35	3072.41	1	| nxp:NX_P20160-1
YYAFDLIAQR	35	1259.64	1	| nxp:NX_P22894-1
LGGSAVISLEGKPL	35	1340.78	1	| nxp:NX_P23528-1
NILDRQDPPSVVV	35	1451.79	1	| nxp:NX_P25311-1
SSGAFWK	35	782.383	1	| nxp:NX_P25311-1
ELPGFLQSGK	35	1075.58	1	| nxp:NX_P25815-1
NEFFEGFPDKQPR	35	1610.76	1	| nxp:NX_P26447-1
LAPEYEAAATR	35	1191.6	1	| nxp:NX_P30101-1
IIYGGSVTGATCK	35	1326.67	1	| nxp:NX_P60174-3
RVVRDPQGI	35	1039.6	1	| nxp:NX_P61626-1
ANWMCLAK	35	993.465	1	| nxp:NX_P61626-1
ACEDHCVAGCFCPEGTVLDDIGQTGCVPVSK	35	3438.45	1	| nxp:NX_P98088-1
VCSTWGSFHYK	35	1371.62	1	| nxp:NX_P98088-1
YSSDYFQAPSDYR	35	1598.68	1	| nxp:NX_Q08380-1
GLTCKNEDQTGR	35	1378.64	1	| nxp:NX_Q9HC84-1
GDLATCPR	35	889.42	1	| nxp:NX_Q9HD89-1
HHEEEIVHHKK	35	1422.72	1	| nxp:NX_Q9UII2-1
FAVLQENVAWGNGR	35	1560.79	1	| nxp:NX_Q9Y6R7-1
PHYHSFDGR	35	1115.5	1	| nxp:NX_Q9Y6R7-1
IQLVEEELDRAQER	34	1727.89	21	| nxp:NX_P09493-2 | nxp:NX_P09493-5 | nxp:NX_P06753-3 | nxp:NX_P06753-4 | nxp:NX_P06753-6 | nxp:NX_P06753-5 | nxp:NX_P06753-2 | nxp:NX_P07951-3 | nxp:NX_P67936-1 | nxp:NX_P09493-7 | nxp:NX_P07951-1 | nxp:NX_P67936-2 | nxp:NX_P09493-10 | nxp:NX_P09493-9 | nxp:NX_P09493-8 | nxp:NX_P09493-6 | nxp:NX_P07951-2 | nxp:NX_P09493-4 | nxp:NX_P09493-1 | nxp:NX_P09493-3 | nxp:NX_P06753-1
FPSIVGRPR	34	1028.6	11	| nxp:NX_P63267-2 | nxp:NX_Q9BYX7-1 | nxp:NX_P60709-1 | nxp:NX_P63261-1 | nxp:NX_P63267-1 | nxp:NX_P62736-1 | nxp:NX_P68133-1 | nxp:NX_P68032-1 | nxp:NX_P0CG38-1 | nxp:NX_Q6S8J3-1 | nxp:NX_A5A3E0-1
KIQVLQQQADDAEERAER	34	2127.08	5	| nxp:NX_P06753-3 | nxp:NX_P06753-4 | nxp:NX_P06753-6 | nxp:NX_P06753-5 | nxp:NX_P06753-2
GVPLYR	34	704.409	4	| nxp:NX_P13929-3 | nxp:NX_P13929-2 | nxp:NX_P13929-1 | nxp:NX_P06733-1
EDQTEYLEER	34	1311.57	4	| nxp:NX_Q58FF6-1 | nxp:NX_Q58FF7-1 | nxp:NX_P08238-1 | nxp:NX_P07900-2
DEENLTQENQDR	34	1490.64	3	| nxp:NX_P01011-3 | nxp:NX_P01011-2 | nxp:NX_P01011-1
CADDRADLAK	34	1134.52	3	| nxp:NX_P02768-2 | contaminant_INT-STD1 | nxp:NX_P02768-1
KKVPQVSTPTLVEVSR	34	1768.03	3	| nxp:NX_P02768-3 | nxp:NX_P02768-2 | nxp:NX_P02768-1
VLSLAQEQVGGSPEK	34	1541.82	3	| nxp:NX_P0C0L4-2 | nxp:NX_P0C0L4-1 | nxp:NX_P0C0L5-1
SPPGKPQGPPQ	34	1089.57	3	| nxp:NX_P10163-1 | nxp:NX_P04280-1 | nxp:NX_P02812-1
VQVEYKGETK	34	1180.62	3	| nxp:NX_P11142-2 | nxp:NX_P54652-1 | nxp:NX_P11142-1
IASEASR	34	733.384	3	| nxp:NX_Q99880-1 | nxp:NX_Q8N257-1 | nxp:NX_Q96A08-1
VQALEEANNDLENK	34	1586.77	2	| contaminant_KERATIN02 | nxp:NX_P35527-1
AQYEEIANR	34	1093.53	2	| contaminant_KERATIN17 | nxp:NX_P13647-1
AQYEGR	34	723.342	2	| contaminant_PIGR_HUMAN | nxp:NX_P01833-1
SFNRGEC	34	869.357	2	| nxp:NX_P01834-1 | contaminant_S68241
YAATSQVLLPSKDVM(+15.994900)QGTDEHVVCK	34	2792.36	2	| nxp:NX_P01871-1 | nxp:NX_P01871-2
DSDWPFCSDEDWNYK	34	1963.74	2	| nxp:NX_P02671-2 | nxp:NX_P02671-1
YTDWKK	34	840.425	2	| nxp:NX_P02763-1 | nxp:NX_P19652-1
DLPSLAADFVESKDVCK	34	1893.93	2	| nxp:NX_P02768-2 | nxp:NX_P02768-1
TCPEQDKYR	34	1196.54	2	| nxp:NX_P05164-1 | nxp:NX_P05164-3
WLPAEYEDGFSLPYGWTPGVKR	34	2568.26	2	| nxp:NX_P05164-1 | nxp:NX_P05164-3
FWWENEGVFSM(+15.994900)QQR	34	1859.82	2	| nxp:NX_P05164-1 | nxp:NX_P05164-3
HFCPNVPIILVGNKK	34	1735.97	2	| nxp:NX_P08134-1 | nxp:NX_P61586-1
SIDVACHPGYALPK	34	1527.76	2	| nxp:NX_P08603-2 | nxp:NX_P08603-1
ESKKEDLVFIFWAPESAPLK	34	2334.24	2	| nxp:NX_P23528-1 | nxp:NX_Q9Y281-1
QAQQERDELADEIANSSGK	34	2088.98	2	| nxp:NX_P35579-2 | nxp:NX_P35579-1
QKAHDQKVEGCFNQLLYDIR	34	2462.22	1	| nxp:NX_O60635-1
ADDLGKGGNEESTK	34	1420.65	1	| nxp:NX_P00441-1
IYHSHIDAPK	34	1180.61	1	| nxp:NX_P00450-1
DIPMNPMCIYR	34	1409.64	1	| nxp:NX_P01008-1
GTEAAGAMFLEAIPM(+15.994900)SIPPEVK	34	2275.13	1	| nxp:NX_P01009-1
YDVENCLANK	34	1225.55	1	| nxp:NX_P01023-1
VTGEGCVYLQTSLK	34	1554.78	1	| nxp:NX_P01023-1
VVLVAVDKGVFVLNKK	34	1728.08	1	| nxp:NX_P01024-1
HLACLPR	34	866.466	1	| nxp:NX_P01033-1
LQDGLLHITTCSFVAPWNSLSLAQR	34	2827.46	1	| nxp:NX_P01033-1
AAPSVFIFPPSDEQLK	34	1745.91	1	| nxp:NX_P01834-1
LEALKENGGAR	34	1157.63	1	| nxp:NX_P02647-1
THLAPYSDELRQR	34	1585.81	1	| nxp:NX_P02647-1
WQEEMELYR	34	1283.57	1	| nxp:NX_P02647-1
ADKPETTKEQLGEFYEALDCLR	34	2613.25	1	| nxp:NX_P02763-1
KPVDEYKDCHLAQVPSHTVVAR	34	2549.29	1	| nxp:NX_P02787-1
EGTCPEAPTDECKPVKWCALSHHER	34	2994.33	1	| nxp:NX_P02787-1
GPLLVQDVVFTDEMAHFDRER	34	2474.21	1	| nxp:NX_P04040-1
DLAKDITSDTSGDFR	34	1640.78	1	| nxp:NX_P04083-1
SSTSPDRIFFHLNAVALGDGGHYTCR	34	2878.37	1	| nxp:NX_P04217-1
LNSIIDVYHK	34	1201.66	1	| nxp:NX_P05109-1
IFKKEDCK	34	1067.56	1	| nxp:NX_P08118-1
VEVERDNLAEDIMR	34	1688.83	1	| nxp:NX_P08670-1
RQVDQLTNDKAR	34	1443.77	1	| nxp:NX_P08670-1
FADLSEAANR	34	1093.53	1	| nxp:NX_P08670-1
LALSSAESSSEDVSQEESLFLISGKPEGR	34	3052.5	1	| nxp:NX_P10163-1
ESIIKLMEK	34	1090.62	1	| nxp:NX_P11684-1
EYSTCTSEGR	34	1189.48	1	| nxp:NX_P14780-1
QSTLVLFPGDLR	34	1345.75	1	| nxp:NX_P14780-1
GEFYSENHHNPPPFAPPVMEFPAAHDR	34	3090.4	1	| nxp:NX_P17213-1
SDVM(+15.994900)YTDWK	34	1160.49	1	| nxp:NX_P19652-1
TGTLAFER	34	894.468	1	| nxp:NX_P20292-1
TISFDIPPQEILTK	34	1601.88	1	| nxp:NX_P27105-1
TCNHPVPQHGGPFCAGDATR	34	2178.96	1	| nxp:NX_P27918-1
SAVAGQDGEVDAEELQR	34	1773.83	1	| nxp:NX_P28676-1
GSFDISCDKDNKR	34	1541.7	1	| nxp:NX_P49913-1
HVFGESDELIGQK	34	1458.72	1	| nxp:NX_P60174-3
KITIADCGQLE	34	1247.63	1	| nxp:NX_P62937-1
DLAGHCYYALCSQDCQVVR	34	2315	1	| nxp:NX_P98088-1
[truncated: 18,699 more rows]
